# Supplementary material for: Scoping review of maternal and newborn health interventions and programmes in Nigeria
Source: PubMed Central journal article supplement — BMJ Open. 2022 Feb 15;12(2):e054784. doi: 10.1136/bmjopen-2021-054784 (PMC8852735; doi:10.1136/bmjopen-2021-054784), 2022-02-15
Supplement: bmjopen-2021-054784.draft_revisions.pdf [file bmjopen-2021-054784.draft_revisions.pdf]

# BMJ Open

BMJ Open is committed to open peer review. As part of this commitment we make the peer review history of every article we publish publicly available.

When an article is published we post the peer reviewers' comments and the authors' responses online. We also post the versions of the paper that were used during peer review. These are the versions that the peer review comments apply to.

The versions of the paper that follow are the versions that were submitted during the peer review process. They are not the versions of record or the final published versions. They should not be cited or distributed as the published version of this manuscript.

BMJ Open is an open access journal and the full, final, typeset and author-corrected version of record of the manuscript is available on our site with no access controls, subscription charges or pay-per-view fees (<http://bmjopen.bmj.com>).

If you have any questions on BMJ Open's open peer review process please email [info.bmjopen@bmj.com](mailto:info.bmjopen@bmj.com)

# BMJ Open

## A scoping review of maternal and newborn health interventions and programs in Nigeria.

|                               |                                                                                                                                                                                                                                                                                                                                                                                                                                                                                                                                                 |
|-------------------------------|-------------------------------------------------------------------------------------------------------------------------------------------------------------------------------------------------------------------------------------------------------------------------------------------------------------------------------------------------------------------------------------------------------------------------------------------------------------------------------------------------------------------------------------------------|
| Journal:                      | <i>BMJ Open</i>                                                                                                                                                                                                                                                                                                                                                                                                                                                                                                                                 |
| Manuscript ID                 | bmjopen-2021-054784                                                                                                                                                                                                                                                                                                                                                                                                                                                                                                                             |
| Article Type:                 | Original research                                                                                                                                                                                                                                                                                                                                                                                                                                                                                                                               |
| Date Submitted by the Author: | 24-Jun-2021                                                                                                                                                                                                                                                                                                                                                                                                                                                                                                                                     |
| Complete List of Authors:     | Nasir, Naima; Jos University Teaching Hospital, APIN Clinic; University of Oxford, Center for Tropical Medicine and Global Health, Nuffield Department of Medicine<br>Aderoba , Adeniyi K. ; Department of Obstetrics and Gynecology, Mother and Child Hospital, Akure, Dept of Obstetrics and Gynaecology; University of Oxford, Center for Tropical Medicine and Global Health, Nuffield Department of Medicine.<br>Ariana, Proochista; University of Oxford, Center for Tropical Medicine and Global Health, Nuffield Department of Medicine |
| Keywords:                     | PUBLIC HEALTH, Health policy < HEALTH SERVICES ADMINISTRATION & MANAGEMENT, OBSTETRICS, GYNAECOLOGY, NEONATOLOGY                                                                                                                                                                                                                                                                                                                                                                                                                                |
|                               |                                                                                                                                                                                                                                                                                                                                                                                                                                                                                                                                                 |

SCHOLARONE™  
Manuscripts

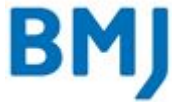

I, the Submitting Author has the right to grant and does grant on behalf of all authors of the Work (as defined in the below author licence), an exclusive licence and/or a non-exclusive licence for contributions from authors who are: i) UK Crown employees; ii) where BMJ has agreed a CC-BY licence shall apply, and/or iii) in accordance with the terms applicable for US Federal Government officers or employees acting as part of their official duties; on a worldwide, perpetual, irrevocable, royalty-free basis to BMJ Publishing Group Ltd ("BMJ") its licensees and where the relevant Journal is co-owned by BMJ to the co-owners of the Journal, to publish the Work in this journal and any other BMJ products and to exploit all rights, as set out in our [licence](#).

The Submitting Author accepts and understands that any supply made under these terms is made by BMJ to the Submitting Author unless you are acting as an employee on behalf of your employer or a postgraduate student of an affiliated institution which is paying any applicable article publishing charge ("APC") for Open Access articles. Where the Submitting Author wishes to make the Work available on an Open Access basis (and intends to pay the relevant APC), the terms of reuse of such Open Access shall be governed by a Creative Commons licence – details of these licences and which [Creative Commons](#) licence will apply to this Work are set out in our licence referred to above.

Other than as permitted in any relevant BMJ Author's Self Archiving Policies, I confirm this Work has not been accepted for publication elsewhere, is not being considered for publication elsewhere and does not duplicate material already published. I confirm all authors consent to publication of this Work and authorise the granting of this licence.

# A scoping review of maternal and newborn health interventions and programs in Nigeria.

## Authors

Naima Nasir<sup>1,2</sup>, Adeniyi Kolade Aderoba<sup>1,3,4</sup>, Proochista Ariana<sup>1</sup>.

Corresponding author: Naima Nasir. Email: [naima.nasir@ndm.ox.ac.uk](mailto:naima.nasir@ndm.ox.ac.uk), Center for Tropical Medicine and Global Health, Peter Medawar Building for Pathogen Research, South Parks Road, Oxford, OX1 3SY, UK.

## Affiliations:

1. Centre for Tropical Medicine and Global Health, Nuffield Department of Medicine, University of Oxford, Oxford, United Kingdom.
2. Infectious Disease Unit (APIN), Jos University Teaching Hospital, Jos, Nigeria.
3. National Perinatal Epidemiology Unit, University of Oxford, Oxford, United Kingdom.
4. Department of Obstetrics and Gynecology, Mother and Child Hospital, Akure, Nigeria

Word count: 3313.

Keywords: maternal health, newborn health, neonatal health, interventions, programs, MNH, RMNCAH, maternal morbidity and mortality, newborn morbidity and mortality, maternal and newborn health measurement, SDGs, Nigeria.

Competing interests: The authors declare that they have no competing interests.

Funding: This research received no specific grant from any funding agency in the public, commercial or not-for-profit sectors.

## Abstract

### Objective

To systematically scope and map research regarding interventions, programs, or strategies to improve maternal and newborn health (MNH) in Nigeria.

### Design: Scoping review

### Data sources and eligibility criteria

Systematic searches were conducted in PubMed, Embase, Scopus, together with a search of the grey literature. Publications presenting interventions and programs to improve maternal or newborn health or both in Nigeria were included.

### Data extraction and analysis

The data extracted included source and year of publication, geographical setting, study design, target population(s), type of intervention/program, duration of implementation, reported outcomes, and any reported facilitators or barriers. Data analysis involved descriptive numerical summaries and content analysis. We further summarised the evidence using a novel model combining the WHO recommendations for MNH, the continuum of care and the social determinants of health frameworks to identify gaps where further research and action may be needed.

### Results

A total of 80 publications were included in this review. Most interventions (71%) were aligned with WHO recommendations, and half (n=40) targeted the pregnancy and childbirth stages of the continuum of care. Most of the programs (n=74) examined the proximal social determinants of maternal health related to health system factors within health facilities, with only a few interventions aimed at distal social determinants such as socio-cultural norms. An integrated approach to intervention implementation and funding constraints were among factors reported as facilitators and barriers, respectively.

### Conclusion

Using a novel model, most MNH interventions in Nigeria were aligned with the WHO recommendations and focused on the proximal social determinants of health within health facilities. We determined a paucity of research on interventions targeting distal social determinants and community-based approaches, with limited attention to pre-pregnancy interventions. To accelerate progress towards the SDG MNH targets, greater focus on implementing interventions and measuring context-specific challenges beyond the health facility is required.

## Article summary

### Strengths and limitations of this study

- A comprehensive search strategy was used including three (3) large databases (PubMed, Embase and Scopus) and the grey literature.
- The review employed a unique approach to map the evidence and identify gaps in maternal and newborn health (MNH) research and action in Nigeria- using an integrated model combining the WHO recommendations for MNH, the continuum of care model for maternal health and the social determinants of health.
- We recognise there may be publication bias, as not all interventions/programs for MNH in Nigeria may have been published and captured in the study.

## Introduction

More women and newborns die in Nigeria than in most countries worldwide. The World Health Organisation (WHO) estimates the maternal mortality ratio (MMR) to be over 800 maternal deaths per 100,000 live births with a neonatal mortality rate of 33 per 1000 live births<sup>1,2</sup> in 2019. These figures contrast with corresponding figures from the UK and the USA which are around 10 to 18 deaths per 100,000 live births, respectively, with neonatal mortality rates below 12 deaths per 1000 live births<sup>2,3</sup>. Maternal and newborn health outcomes are intricately linked; hence, maternal deaths significantly affect newborn survival and development<sup>4-6</sup>. Thus, the Sustainable Development Goal (SDG) 3 calls for all countries to reduce maternal mortality ratios to less than 70 per 100 000 live births and neonatal mortality to less than 12 deaths per 1,000 live births by 2030<sup>2,7</sup>. However, if current trends continue, Nigeria will fall far short of these targets despite existing efforts and resource allocations<sup>8</sup>. Of note, the global maternal and newborn health community has recently intensified efforts on innovative indicators to measure progress in maternal and newborn health towards achieving the SDG targets<sup>9-11</sup>.

Most maternal deaths in Nigeria are reportedly due to preventable obstetric causes<sup>6</sup>. Furthermore, complications of preterm birth, intrapartum events, and infections account for over 80% of newborn deaths and stillbirths<sup>2,6,12</sup>. Underlying these conditions, socioeconomic, cultural, political, and environmental factors contribute to the persistently high and inequitable burden of maternal and neonatal mortality in Nigeria<sup>7</sup>. The highest rates of deaths and morbidity occur among the poor, rural communities, where many challenges to improve maternal and newborn health remain<sup>8,13</sup>. In addition, some religious and sociocultural norms adversely influence health-seeking behaviour and expose women to discriminatory practices which pose serious health risks<sup>8,13</sup>. Addressing these underlying social conditions and inequities will not only facilitate efforts to improve maternal and neonatal mortality and morbidity and perhaps improve other dimensions of health and well-being.

Beyond the clinical causes and social determinants that underpin maternal and newborn morbidity and mortality, evidence shows that coordinated strategies across the reproductive, maternal, newborn, child and adolescent health continuum of care improves the general well-being of young women and mothers and the development of newborns<sup>4,6</sup>. Thus, the WHO recommends the “essential packages of interventions for low and middle-income settings” should be provided across the continuum of care to improve maternal and newborn health<sup>5,14-16</sup>. Such interventions include family planning, appropriate antenatal care, immediate thermal

1  
2  
3 care for newborns and early initiation of exclusive breastfeeding amongst others. Furthermore,  
4 increasing evidence suggests that addressing maternal health inequities through action on the  
5 social determinants of health can significantly improve maternal and newborn health  
6 outcomes<sup>17</sup>.  
7  
8  
9

10 It is not entirely clear why, despite laudable efforts to improve the situation in Nigeria, the  
11 burden of maternal and newborn mortality and morbidity persists<sup>8</sup>. Understanding the evidence  
12 and gaps for maternal and neonatal health interventions and programs will help to identify areas  
13 to focus new MNH measurement tools and direct future resource allocations.  
14  
15  
16  
17

18 This study aims to systematically scope and map the published literature on interventions,  
19 programs, or strategies implemented to improve maternal and newborn health in Nigeria. By  
20 integrating and applying existing key frameworks in maternal and newborn health<sup>17-20</sup>, this  
21 study identifies evidence gaps that require further research and highlights areas where action  
22 is needed. The following objectives were formulated following an initial exploratory search:  
23  
24  
25  
26

- 27 a) Outline the types of interventions for maternal and newborn health in Nigeria and their  
28 characteristics.  
29  
30 b) Describe the nature and range of evidence.  
31  
32 c) Elaborate the study settings and target populations.  
33  
34 d) Examine reported evidence of outcomes or effectiveness or impact.  
35  
36 e) Identify reported facilitators and barriers of effective implementation of interventions.  
37  
38  
39  
40  
41  
42  
43

## 44 **Methods**

45  
46 The review was conducted according to the methodological guidance for scoping reviews  
47 provided by the Joanna Briggs Institute (JBI) manual for evidence synthesis<sup>21</sup>. The main  
48 research question guiding the review was: what is the evidence available for maternal and  
49 newborn health interventions in Nigeria? An intervention was defined as “a single or a  
50 combination of program elements or strategies designed to produce behavioural changes or  
51 improve health status, outcomes, or both among individuals or an entire population”<sup>22</sup>. We  
52 focused on research studies evaluating the effectiveness of interventions on outcomes related  
53 to maternal and newborn health.  
54  
55  
56  
57  
58  
59  
60



## Search strategy

A preliminary database search was undertaken to identify keywords and index terms for articles related to the review topic and refine the search strategy. Thereafter, the definitive search of PubMed, Embase (via OVID), and Scopus (via OVID) was conducted by NN between June and July 2020 to identify relevant publications. The searches were updated in May 2021 by rerunning the searches and through email alerts. The search expressions in PubMed including keywords and MeSH terms used were: “Maternal Health” OR “Infant, Newborn” OR “Infant Health” AND “Nigeria” AND (intervention OR program OR strategy). No filter was used to restrict results. Similar search terms were used for the other databases. This was supplemented by a web-based search of the grey literature, and a Google scholar search using similar terms, including a directed search of relevant key organisations websites. Cited references were examined by browsing the reference lists of studies to identify additional eligible studies.

## Eligibility criteria and selection of sources of evidence

Table 1 outlines the inclusion and exclusion criteria and the sources of evidence. The results from the searches were screened in an iterative process by two authors (NN and AKA). First, the sources were screened based on the information presented in the title and abstract. Next, full-text articles were assessed to determine their eligibility for inclusion using the criteria in Table 1. Discrepancies regarding eligibility were resolved by consensus and discussion with a third author (PA).

## Data charting and summary

The included literature was reviewed using a data extraction form developed through an iterative process to identify the data elements critical to answering the review question and objectives. The form was piloted with 10% of the included studies to ensure consistency and revised, as necessary.

The extracted data included authors, year of publication, geographical setting, study design, target population(s), type and description of intervention, duration of implementation, reported outcomes, and any facilitators or barriers.

The first author (NN) charted the data, and the second author (AKA) reviewed the data. Any disagreements between the reviewers were resolved by a consensus involving the third author (PA) whenever necessary. In line with the scoping review methodology, a formal assessment

of the methodological quality of the included studies was not undertaken, as the intention was to provide a broad overview of the existing literature related to the review question<sup>21</sup>. Data extracted across the included sources of evidence was summarised using figures, tables, and summaries.

To further map and summarize the evidence, we used an integrated model developed from the World Health Organisation (WHO) recommended interventions for maternal and newborn health<sup>4,18,20</sup>, the continuum of care approach for maternal health<sup>19</sup> and the social determinants of health framework<sup>17,23</sup>.

### Patient and public involvement

No patient was involved in this study.

**Table 1: Inclusion and Exclusion criteria**

| Criteria               | Inclusion                                                                                                        | Exclusion                                                                                                                                                                     |
|------------------------|------------------------------------------------------------------------------------------------------------------|-------------------------------------------------------------------------------------------------------------------------------------------------------------------------------|
| <b>Type of studies</b> | Any existing literature including journal articles, systematic reviews, grey literature, and evaluation reports. | conference proceedings, study protocols, editorials, cost effectiveness studies, modelling studies or commentaries on MNH interventions.                                      |
| <b>Setting</b>         | Nigeria; International/multi-country studies including Nigeria.                                                  | studies with topics not reporting on MNH interventions in Nigeria.                                                                                                            |
| <b>Time period</b>     | No time limits set                                                                                               |                                                                                                                                                                               |
| <b>Language</b>        | Studies in English                                                                                               | Studies not in English                                                                                                                                                        |
| <b>Focus of study</b>  | Studies focused on maternal and newborn health (MNH) interventions/programs.                                     | Studies without an intervention/program for MNH or outcomes not focused on MNH, Studies where intervention/program focused only on child health and did not include newborns. |

## Results

### Overview of the literature search

The systematic literature search resulted in 827 publications after removing the duplicates. A total of 79 full texts were assessed, of which 52 were included in the review. An additional 28 articles were retrieved from citations, and the full texts were assessed and included in the review. A total of 80 publications were included in the final review<sup>24-103</sup>. A PRISMA flow diagram in Figure 1 summarises the search results and screening processes for this study.

### Characteristics of included literature.

The characteristics of the included sources of evidence are summarised in Table 2, and the details of each publication are presented in Supplementary Table S1. Figures 2 and 3 show the integrated model developed to further map the MNH interventions and programs in the included studies and the results of mapping are summarised below.

### ***Intervention and programs along the continuum of care for maternal and newborn health.***

Half (n=40) of the interventions targeted pregnancy, childbirth, or both. Only four interventions were targeted at the pre-pregnancy stage and involved family planning or contraception services<sup>46,50-52</sup>. Nine interventions focused on the postpartum period for mothers, newborns, or both, and involved postpartum family planning<sup>44,79</sup>, promoting early breastfeeding<sup>38,39</sup>, neonatal resuscitation<sup>34</sup>, keeping the baby warm<sup>69</sup>, immunisation<sup>73,95</sup> and a combination of essential newborn interventions<sup>43</sup>. Just over one-third (34%, n=27) of the programs spanned all stages of the continuum of care.

### ***Alignment with WHO recommendations for improving maternal and newborn health.***

Most of the publications reviewed (71%, n=57) reported interventions aligned with the WHO recommendations. The rest studies (29%, n=23) aimed to improve quality or standard of maternal and newborn health services mainly through capacity building of health providers, improving access through community health insurance schemes, providing free MNH services, emergency loans, conditional cash transfers, and outreach services.

### ***Mapping interventions to the social determinants of health framework for maternal health***

Nearly all interventions (93%, n=74) focused on the proximal social determinants of health. These include health system factors such as demand, access, quality, and utilization of maternal and newborn health services (n=38), improving maternal health knowledge and behaviour

1  
2  
3 (n=18), and improving the health status of mothers and newborns by addressing obstetric  
4 and/or newborn complications and diseases (n=18). Only six studies had interventions targeted  
5 at distal social determinants of health, including public policies, gender dynamics, or socio-  
6 cultural norms<sup>45,75,78,92,97,99</sup>.

### 10 ***Types of studies, year of publication and lead author/institution.***

11  
12  
13 Of the literature included, 71 publications were journal articles, and nine were program  
14 evaluation reports. The publication year ranged from 1982 to 2020, with most sources (n =64)  
15 published between 2010 and 2018 (Figure 4). The publications included in this review  
16 employed many study types/designs. One-quarter of the reviewed studies involved a process,  
17 outcome, or impact evaluation (n=21), followed by quasi-experimental designs (n=16), pre-or  
18 post-intervention designs (n=15), and post-intervention analysis (n=13). Nearly one-third  
19 (30%, n=24) of the reviewed studies reported having a comparison group, including eight (8)  
20 randomized control trials. Only six (6) sources used qualitative methods, and the remaining 74  
21 were quantitative, two of which used a mixed-methods design<sup>79,83</sup>. Over half (60%, n=48) of  
22 the reviewed articles had the lead author or institution based in Nigeria. Study duration varied  
23 as follows: less than a year (n=10), one year to 5 years (n=53), and greater than five years  
24 (n=13).

### 25 ***Geographical region, setting and site of intervention.***

26  
27  
28 Based on Nigeria's six geopolitical regions, over half (51%, n=41) of the studies reported  
29 interventions in a single region, and 21 studies reported interventions across two or more  
30 regions. About a third (n=28) of the studies were conducted in the northern regions and 21  
31 studies in the southern regions. Thirteen studies (16%) involved settings in both the northern  
32 and southern regions. Six studies reported national coverage, including one study involving all  
33 36 states of Nigeria and the Federal Capital Territory (FCT)<sup>75</sup>. Two studies reported multi-  
34 country sites, including Nigeria<sup>88,100</sup>.

35  
36  
37 There were fewer community-based interventions or programs (39%, n=31) compared to those  
38 in health facilities (46%, n=37). The health facilities included ranged from primary care clinics  
39 to referral hospitals. A small portion (15%, n=12) of the studies reported both community and  
40 health facility program sites. More studies (47.5%, n=38) were conducted in a rural setting  
41 compared to an urban environment (34%, n=27), with approximately 19% (n=15) involving  
42 both rural and urban settings.

### ***Target populations.***

Most interventions in the literature reviewed (79%, n=63) were targeted mainly at pregnant women, mothers, and women of childbearing age, described as 15 to 49 years of age, with one specifically focused on young adolescent females<sup>42</sup>. Eleven interventions focused on health care providers, including community health workers and midwives<sup>25,34,35,58,60,87,88,91,97,100</sup>. Four interventions involved community members, including the male members of the community, husbands, or both<sup>45,89,92,99</sup>. Two interventions specifically targeted policymakers<sup>48,75</sup>.

### ***Reported outcomes, effectiveness, or impact.***

The interventions outlined in the reviewed literature sought to address a wide range of outcomes. Nearly half (45%, n=33) had outcomes related to improving the demand, access, coverage, quality, and utilisation of essential maternal and newborn health services, interventions, or both. Other outcomes include reducing maternal or newborn deaths or both<sup>24,26,68,69,72,78,102,27,32,34,49,60,62,64,67</sup>; improving knowledge of preventive practices and self-management<sup>30,38,93,95,39,50,51,55,65,71,73,74</sup>; improving community participation in maternal and newborn health including male members of the community<sup>28,45,92,99</sup>; capacity building of the health workforce<sup>44,77,79,86,88</sup>; and the prevention and management of pregnancy or newborn related diseases and complications, or both<sup>31,35,37,40,41,57,61,66,96,103</sup>.

### ***Reported barriers and facilitators.***

Not all included studies reported facilitators and/or barriers of implementing the interventions. Forty-six studies (n=46) reported factors that facilitate or positively influence the intervention or program. The most common facilitators reported were community engagement and participation (50%, n=23)<sup>24,25,53,54,63,65,77,85,91,92,98,100,27,101,102,28,31,39,41,42,45,51</sup>. Others included an integrated approach to implementation of interventions<sup>31,48,85,89,98</sup>; communication of adequate (and culturally appropriate) knowledge about the program or intervention<sup>54,65,69,103</sup> and demand creation activities<sup>52,53</sup>.

Forty-two studies (n=42) reported barriers, with funding limitations posing the main challenge to implementation reported in 11 studies<sup>25,27,94,33,53,78,80,82,86,91,92</sup>. Nine studies reported negative attitudes and perceptions regarding the intervention, the health system, or both as a barrier<sup>36,39,48,53,64,71,79,82,83</sup>.

Table 2: General characteristics of included sources of evidence.

| Characteristics                         | Number of studies (%),<br>n=80 | References                                                                                   |
|-----------------------------------------|--------------------------------|----------------------------------------------------------------------------------------------|
| <b>Study Design</b>                     |                                |                                                                                              |
| Systematic Review                       | 1 (1.25)                       | 45                                                                                           |
| RCT                                     | 8 (10)                         | 22,34,76,78,80,91,92,99                                                                      |
| Quasi-experimental                      | 16 (20)                        | 32,46,50,59–61,68,70–72,77,85,93,97,98                                                       |
| Cohort/longitudinal                     | 6 (7.5)                        | 33,47,49,53,57,65                                                                            |
| Post-intervention/program evaluation    | 13 (16.25)                     | 21,24,28–30,39,48,56,79,84,87,90,94                                                          |
| Pre-post/before after studies           | 15 (18.75)                     | 20,35,36,51,52,55,58,62,63,67,69,75,83,88,89                                                 |
| Process/outcome/impact evaluation       | 21 (26.25)                     | 23,26,27,31,37,38,40–42,44,54,64,66,73,74,81,82,86,95,96                                     |
| <b>Type of study</b>                    |                                |                                                                                              |
| Qualitative                             | 7 (8.75)                       | 21,24,44,81,87,88,90                                                                         |
| Quantitative                            | 71 (88.75)                     | 20,22,23,25–27,30–42,45–74,76–78,80,82–86,89,91–99                                           |
| Mixed Methods                           | 2 (2.5)                        | 75,79                                                                                        |
| <b>Control or Comparison group/unit</b> |                                |                                                                                              |
| Yes                                     | 24(30)                         | 22,25–27,32–36,57,72,76–78,80,81,83,85,91–93,97–99                                           |
| No                                      | 56(70)                         | 20,21,23,24,28–31,37–56,58–71,73–75,79,82,84,86–90,94–96                                     |
| <b>Setting</b>                          |                                |                                                                                              |
| rural                                   | 38(47.5)                       | 22,23,27,29,34,35,38–42,46,49,51,53,56,57,59,67,69,70,72–74,77,81,83,85,86,88,89,92,93,95–99 |
| urban                                   | 27(33.75)                      | 21,28,30–33,36,47,48,52,54,58,61–64,75,76,78,80,82,84,87,90,91,94                            |
| rural and urban                         | 15(18.75)                      | 20,24–26,37,43–45,50,55,60,65,66,71,79                                                       |
| <b>Site of Intervention</b>             |                                |                                                                                              |
| Community                               | 31(38.75)                      | 22,24–27,29,34,35,38,41,46,47,49,51,53,59,61,67,69–71,77,81,83,86,88,91,95–97                |
| Health facility                         | 37(46.25)                      | 21,23,28,30–33,36,37,39,40,42,48,50,52,54–58,60,62–64,66,68,74–76,78–80,82,84,88,90,92,99    |
| Community and health facility           | 12(15)                         | 20,43–45,65,73,85,87,89,93,94,98                                                             |
| <b>Geographical Region</b>              |                                |                                                                                              |
| North West                              | 22(27.5)                       | 20,21,24,26,27,29,32,34,43,44,60,61,66,67,74,81,87–89,93,99                                  |
| North Central                           | 5(6.25)                        | 33,52,80,85,90                                                                               |
| North East                              | 3(3.75)                        | 23,46,54                                                                                     |
| South West                              | 8(10)                          | 22,35,36,62,70,76,91,92                                                                      |
| South East                              | 4(5)                           | 28,53,56,64                                                                                  |
| South South                             | 9(11.25)                       | 51,57,59,69,78,79,94,95,97                                                                   |
| Multiple: Northern regions              | 8(10)                          | 25,38,41,42,50,72,75,98                                                                      |
| Multiple: North and South regions       | 9(11.25)                       | 31,39,40,47,49,58,73,82,86                                                                   |
| Country-wide: all geographic regions    | 10(12.5)                       | 30,37,45,48,55,63,65,71,77,83                                                                |
| Multi-country: Nigeria included         | 2(2.5)                         | 84,96                                                                                        |
| <b>Lead author/Institution base</b>     |                                |                                                                                              |
| Nigeria                                 | 48(60)                         | 21,23,26–28,30,33,35,36,38–43,45,46,49,50,53–56,58–60,62–64,66,67,69–71,74,77,79,81,87–95    |
| International                           | 32(40)                         | 20,22,24,25,29,31,34,37,44,47,48,51,65,68,72,73,75,76,78,80,82–86,96,98,99                   |

## Discussion

It is promising to see increasing research on maternal and neonatal health programs in Nigeria. Following a systematic search of literature on existing interventions and programs in Nigeria, this study used a novel approach to identify gaps for research and action on MNH interventions and programs in Nigeria. We developed an integrated model combining the WHO recommendations for maternal and newborn health with the continuum of care and the social determinants of health frameworks. This approach can provide researchers and policy makers a rigorous method to examine and assess gaps in MNH interventions and service delivery and identify country-specific priorities to focus attention.

Our findings show that the interventions in a large majority of studies in this review (71%), aligned with the WHO recommendations for maternal and newborn health. Most interventions targeted the pregnancy and childbirth stages of the continuum of care. This is likely related to evidence showing that the most important causes of maternal and newborn deaths occur during these periods<sup>7,104</sup>. Only a few studies focused on the pre-pregnancy stage and the provision of family planning services. This area requires further attention, as studies have shown that providing reproductive health services, mainly contraceptive services, can help with further reductions in maternal and newborn mortality<sup>7,17,104</sup>.

Accordingly, most studies examined the proximal social determinants of health, such as access to and availability of relevant health services within health facilities, with only a few investigating programmes aimed at the more distal social determinants of health, such as gender, cultural and religious norms, and public policies. Although these proximal social determinants remain essential and have not been adequately addressed, it is now understood that distal determinants significantly influence maternal health and its outcomes<sup>17,104</sup>. Furthermore, increasing evidence suggests actions to improve these distal social determinants can improve maternal and newborn health outcomes<sup>17</sup>. This highlights the need for further research on how social interventions affect maternal and neonatal health outcomes in Nigeria to inform program development and implementation.

Of the 80 publications reviewed, over 80% reported achieving the interventions' intended outcomes. Many of the programs investigated interventions related to WHO recommendations, with a focus on women and their engagement with health facilities. This study also highlights existing programs have focused on measuring coverage of evidence-based MNH interventions in health facilities, with limited attention to community-based interventions. Importantly, the

1  
2  
3 research does not clearly show whether these interventions were chosen to align with country-  
4 level priorities. Consequently, to accelerate progress towards the SDG goals of ending  
5 preventable maternal and newborn deaths, a broader lens to identify and measure critical and  
6 context-specific factors beyond the health facility is required. Country level researchers may  
7 be better posed to understand and highlight country-level priorities for MNH research. Of note,  
8 international collaborators led over a third of the research in this review. Going forward, we  
9 implore global health institutions to actively improve local research capacity and funding  
10 towards understanding country-level MNH priorities as articulated by the African Academy of  
11 Science<sup>105,106</sup>.

12  
13  
14  
15  
16  
17  
18  
19  
20  
21  
22  
23  
24  
25  
26  
27  
28  
29  
30  
31  
32  
33  
34  
35  
36  
37  
38  
39  
40  
41  
42  
43  
44  
45  
46  
47  
48  
49  
50  
51  
52  
53  
54  
55  
56  
57  
58  
59  
60  
Factors that facilitated achieving intended outcomes involved engagement with the  
communities and integration of multiple interventions. This result supports the call for the  
application of integrated packages of effective health interventions across the continuum of  
care, re-emphasized by the strategic plans to achieve SDG 3<sup>19,104</sup>. In addition, these findings  
highlight the role of participatory mechanisms to engage families (including men) and  
communities in improving maternal and newborn health<sup>17</sup>. Two key barriers to interventions  
achieving their intended health outcomes were funding limitations and negative attitudes and  
perceptions. This may be related to the need for public engagement to address participants'  
critical concerns and the need for more integrated interventions.

The search strategy was limited to PubMed, Embase and Scopus databases; thus, publications  
in excluded databases might be missing in this review. Nevertheless, we conducted a grey  
literature search alongside these databases to cover other relevant resources. Although we  
carefully considered the search terms used in our strategy, we recognize that there may be  
publication bias, as not all interventions/programs for maternal and newborn health will have  
been published.

A broad range of study designs were employed in the studies included in this review. However,  
most employed quantitative approaches with only a small fraction using qualitative and mixed  
methods approaches. Given the nature of MNH interventions and the complexity of the  
challenges facing women and newborns, multidisciplinary research and mixed methods  
approaches are needed to add depth to understanding the contextual nuances of maternal and  
newborn health. This helps to uncover unknown and emerging factors which potentially  
informs better use of limited resources. An important domain to consider within the spectrum  
of factors that can influence maternal and newborn health outcomes is the quality of services



1  
2  
3 received by women and children<sup>107</sup>, especially if they suffer mistreatment<sup>108,109</sup>. Country level  
4 researchers may be better posed to understand and highlight country-level priorities for MNH  
5 research. Of note, international collaborators led over a third of the research in this review.  
6  
7 Going forward, we implore global health institutions to actively improve local research  
8 capacity and funding towards understanding country-level MNH priorities as articulated by the  
9 African Academy of Science<sup>105,106</sup>.

## 14 **Conclusion**

16 Using a novel model combining WHO recommendations for maternal and newborn health, the  
17 continuum of care and the social determinants of health frameworks, most MNH interventions  
18 were aligned with the WHO recommendations and focused on the proximal social determinants  
19 of health. These were related largely to health system factors within health facilities. In  
20 addition, the model showed only a few programs targeted the more distal social determinants  
21 of maternal health such as religious and cultural barriers and MNH policies and highlights the  
22 relative neglect of non-facility-based interventions. The evidence evaluating MNH outcomes  
23 was mostly quantitative and with only a few benefiting from qualitative and mixed methods  
24 approaches, thus limiting the exploration of contextual factors that influence maternal and  
25 newborn health outcomes. Therefore, efforts to improve maternal and newborn health in  
26 Nigeria and other similar contexts may need to focus greater attention on implementing MNH  
27 interventions and measuring context-specific challenges beyond the health facility. This may  
28 help to accelerate progress towards the SDG goal of ending preventable maternal and newborn  
29 deaths.

## 41 **Author contributions:**

43 The conception and design of the research was by NN, AKA and PA. Data collection and  
44 analysis and interpretation of results were conducted by NN, AKA and PA. The first draft of  
45 the manuscript was written by NN, and all authors contributed to subsequent revisions. All  
46 authors read and approved the final manuscript.

## References

1. World Health Organization (WHO). Maternal health in Nigeria: generating information for action [Internet]. WHO. World Health Organization; 2019 [cited 2020 Nov 22]. Available from: <http://www.who.int/reproductivehealth/maternal-health-nigeria/en/>
2. United Nations Inter-agency Group for Child Mortality Estimation (UN IGME). Levels and trends in child mortality 2018 Report: estimates developed by the UN Inter-agency group for Child mortality estimation. New York; 2018.
3. World Health Organization (WHO). Trends in maternal mortality: 1990 to 2015. Estimates by WHO, UNICEF, UNFPA, World Bank Group and the United Nations Population Division. [Internet]. WHO. World Health Organization; 2015 [cited 2019 Aug 9]. Available from: [https://apps.who.int/iris/bitstream/handle/10665/193994/WHO\\_RHR\\_15.23\\_eng.pdf?sequence=1](https://apps.who.int/iris/bitstream/handle/10665/193994/WHO_RHR_15.23_eng.pdf?sequence=1)
4. The Partnership for Maternal Newborn and Child Health. Essential Interventions, Commodities and Guidelines for Reproductive, Maternal, Newborn and Child Health [Internet]. Geneva, Switzerland; 2011 [cited 2020 May 4]. Available from: [http://www.who.int/pmnch/topics/part\\_publications/essential\\_interventions\\_18\\_01\\_2012.pdf](http://www.who.int/pmnch/topics/part_publications/essential_interventions_18_01_2012.pdf)
5. United Nations. MDG Report 2015. In: Disease Control Priorities, Third Edition (Volume 2): Reproductive, Maternal, Newborn, and Child Health [Internet]. The World Bank; 2016 [cited 2020 May 11]. p. 1–23. Available from: [https://elibrary.worldbank.org/doi/full/10.1596/978-1-4648-0348-2\\_ch1](https://elibrary.worldbank.org/doi/full/10.1596/978-1-4648-0348-2_ch1)
6. Burchett HE, Mayhew SH. Maternal mortality in low-income countries: What interventions have been evaluated and how should the evidence base be developed further? *Int J Gynecol Obstet.* 2009;105(1):78–81.
7. Black RE, Levin C, Walker N, Chou D, Liu L, Temmerman M, et al. Reproductive , maternal , newborn , and child health : key messages from Disease Control Priorities 3rd Edition. *Lancet* [Internet]. 2015;388(10061):2811–24. Available from: [http://dx.doi.org/10.1016/S0140-6736\(16\)00738-8](http://dx.doi.org/10.1016/S0140-6736(16)00738-8)

- 1  
2  
3 8. Izugbara CO, Wekesah FM, Adedini SA. Maternal Health in Nigeria: A Situation  
4 Update. Nairobi, Kenya; 2016.
- 5  
6  
7 9. Marchant T, Boerma T, Diaz T, Huicho L, Kyobutungi C, Mershon CH, et al.  
8 Measurement and accountability for maternal, newborn and child health: Fit for 2030.  
9 BMJ Glob Heal [Internet]. 2020 Jul 5 [cited 2021 Apr 26];5(7):2697. Available from:  
10 [https://www.](https://www.bmj.com/lookup/doi/10.1136/bmjgh-2020-002697)  
11  
12  
13  
14
- 15 10. Grove J, Claeson M, Bryce J, Amouzou A, Boerma T, Waiswa P, et al. Maternal,  
16 newborn, and child health and the Sustainable Development Goals - A call for  
17 sustained and improved measurement [Internet]. Vol. 386, The Lancet. Lancet  
18 Publishing Group; 2015 [cited 2021 Apr 26]. p. 1511–4. Available from:  
19 <http://gaviprogressreport.org/2014/>  
20  
21  
22  
23
- 24 11. Maternal Health Taskforce. Who decides what matters in maternal and newborn health  
25 measurement? [Internet]. 2021 [cited 2021 Apr 26]. Available from:  
26 [https://www.mhtf.org/2021/02/24/who-decides-what-matters-in-maternal-and-](https://www.mhtf.org/2021/02/24/who-decides-what-matters-in-maternal-and-newborn-health-measurement/)  
27 [newborn-health-measurement/](https://www.mhtf.org/2021/02/24/who-decides-what-matters-in-maternal-and-newborn-health-measurement/)  
28  
29  
30
- 31 12. Ezeh OK, Agho KE, Dibley MJ, Hall J, Page AN. Determinants of neonatal mortality  
32 in Nigeria: Evidence from the 2008 demographic and health survey. BMC Public  
33 Health. 2014 May 29;14(1).
- 34  
35  
36  
37 13. Ujah IAO, Aisien OA, Mutahir JT, Vanderjagt DJ, Glew RH, Uguru VE. Factors  
38 Contributing to Maternal Mortality in North-Central Nigeria: A Seventeen-Year. Afr J  
39 Reprod Health. 2005;9(3):27–40.
- 40  
41  
42  
43 14. Lassi ZS, Mansoor T, Salam RA, Das JK, Bhutta ZA. Essential pre-pregnancy and  
44 pregnancy interventions for improved maternal, newborn and child health. Reprod  
45 Health [Internet]. 2014 [cited 2020 May 5];11. Available from:  
46 <http://www.reproductive-health-journal.com/content/11/S1/S2>  
47  
48  
49  
50
- 51 15. Lassi ZS, Middleton PF, Crowther C, Bhutta ZA. Interventions to Improve Neonatal  
52 Health and Later Survival: An Overview of Systematic Reviews. EBioMedicine. 2015  
53 Aug 1;2(8):985–1000.
- 54  
55  
56  
57 16. Salam RA, Mansoor T, Mallick D, Lassi ZS, Das JK, Bhutta ZA. Essential childbirth  
58 and postnatal interventions for improved maternal and neonatal health. Reprod Health  
59  
60

- [Internet]. 2014 [cited 2020 May 5];11. Available from: <http://www.reproductive-health-journal.com/content/11/S1/S3>
17. UNDP. Discussion Paper: A social determinants approach to maternal health. Roles for development actors. 2011.
  18. World Health Organization (WHO). WHO recommendations on newborn health: guidelines approved by the WHO Guidelines Review Committee [Internet]. Geneva; 2017 [cited 2020 May 4]. (Licence: CC BY-NC-SA 3.0 IGO.). Report No.: (WHO/MCA/17.10). Available from: [https://www.who.int/maternal\\_child\\_adolescent/documents/newborn-health-recommendations/en/](https://www.who.int/maternal_child_adolescent/documents/newborn-health-recommendations/en/)
  19. Kerber KJ, de Graft-Johnson JE, Bhutta ZA, Okong P, Starrs A, Lawn JE. Continuum of care for maternal, newborn, and child health: from slogan to service delivery [Internet]. Vol. 370, Lancet. 2007 [cited 2019 Mar 29]. p. 1358–69. Available from: [www.thelancet.com](http://www.thelancet.com)
  20. World Health Organization (WHO). WHO Recommendations on maternal health. Guidelines approved by the WHO guidelines review committee. 2017.
  21. Aromataris E, Munn Z, (Editors). JBI Manual for Evidence Synthesis. JBI Manual for Evidence Synthesis. 2020.
  22. Intervention MICA: Building Healthy Communities. What is an Intervention? [Internet]. 2017 [cited 2021 Apr 6]. Available from: <https://health.mo.gov/data/interventionmica/>
  23. Hamal M, Dieleman M, De Brouwere V, De Cock Buning T. Social determinants of maternal health: A scoping review of factors influencing maternal mortality and maternal health service use in India. Public Health Rev [Internet]. 2020 Jun 2 [cited 2020 Sep 16];41(1):13. Available from: <https://publichealthreviews.biomedcentral.com/articles/10.1186/s40985-020-00125-6>
  24. Sloan NL, Storey A, Fasawe O, Yakubu J, McCrystal K, Wiwa O, et al. Advancing Survival in Nigeria: A Pre-post Evaluation of an Integrated Maternal and Neonatal Health Program. Matern Child Health J [Internet]. 2018 Jul [cited 2020 Jun 10];22(7):986–97. Available from: <https://doi.org/10.1007/s10995-018-2476-3>

- 1  
2  
3 25. Oguntunde O, Surajo IM, Dauda DS, Salihu A, Anas-Kolo S, Sinai I, et al.  
4  
5 Overcoming barriers to access and utilization of maternal, newborn and child health  
6  
7 services in northern Nigeria: an evaluation of facility health committees. *BMC Health*  
8  
9 *Serv Res* [Internet]. 2018 Feb 9 [cited 2020 Jun 16];18(1):104. Available from:  
10  
11 <https://bmchealthservres.biomedcentral.com/articles/10.1186/s12913-018-2902-7>  
12
- 13 26. Alexander DA, Northcross A, Karrison T, Morhasson-Bello O, Wilson N, Atalabi OM,  
14  
15 et al. Pregnancy outcomes and ethanol cook stove intervention: A randomized-  
16  
17 controlled trial in Ibadan, Nigeria. *Environ Int*. 2018 Feb 1;111:152–63.  
18
- 19 27. Abegunde D, Orobato N, Sadauki H, Bassi A, Kabo IA, Abdulkarim M, et al.  
20  
21 Countdown to 2015: Tracking maternal and child health intervention targets using Lot  
22  
23 Quality Assurance Sampling in Bauchi State Nigeria. *PLoS One* [Internet]. 2015 [cited  
24  
25 2020 Jun 9];10(6):e0129129. Available from:  
26  
27 [http://www.plosone.org/article/fetchObject.action?uri=info:doi/10.1371/journal.pone.0](http://www.plosone.org/article/fetchObject.action?uri=info:doi/10.1371/journal.pone.0129129&representation=PDF)  
28  
29 [129129&representation=PDF](http://www.plosone.org/article/fetchObject.action?uri=info:doi/10.1371/journal.pone.0129129&representation=PDF)  
30
- 31 28. Cannon M, Charyeva Z, Oguntunde O, Sambisa W, Shoretire K, Orobato N, et al. A  
32  
33 case study of community-based distribution and use of Misoprostol and Chlorhexidine  
34  
35 in Sokoto State, Nigeria. *Glob Public Health* [Internet]. 2017 Dec;12(12):1553–67.  
36  
37 Available from: <http://www.tandf.co.uk/journals/titles/17441692.asp>  
38
- 39 29. Findley SE, Uwemedimo OT, Doctor H V, Green C, Adamu F, Afenyadu GY. Early  
40  
41 results of an integrated maternal, newborn, and child health program, Northern  
42  
43 Nigeria, 2009 to 2011. *BMC Public Health*. 2013 Oct 31;13(1):1034.  
44
- 45 30. Ishola G, Fayehun F, Isiugo-Abanihe U, Segun T, Yusuf S, Orji B, et al. Effect of  
46  
47 Volunteer Household Counseling in Improving Knowledge of Birth Preparedness and  
48  
49 Complication Readiness of Pregnant Women in Northwest Nigeria. *Afr J Reprod*  
50  
51 *Health*. 2017 Mar;21(1):39–48.  
52
- 53 31. Orobato N, Austin AM, Abegunde D, Ibrahim M, Mohammed Z, Abdul-Azeez J, et  
54  
55 al. Scaling-up the use of sulfadoxine-pyrimethamine for the preventive treatment of  
56  
57 malaria in pregnancy: results and lessons on scalability, costs and programme impact  
58  
59 from three local government areas in Sokoto State, Nigeria. *Malar J* [Internet]. 2016  
60  
Nov [cited 2020 Jun 10];15(1):1–24. Available from:  
<http://www.malariajournal.com/home/>

- 1  
2  
3 32. Ezugwu EC, Agu PU, Nwoke MO, Ezugwu FO. Reducing maternal deaths in a low  
4 resource setting in Nigeria. *Niger J Clin Pract* [Internet]. 2014 Jan [cited 2020 Jun  
5 10];17(1):62–6. Available from:  
6  
7 <http://www.njcponline.com/text.asp?2014/17/1/62/122842>  
8  
9
- 10  
11 33. Orobato N, Abegunde D, Shoretire K, Abdulazeez J, Fapohunda B, Lamiri G, et al. A  
12 report of at-scale distribution of chlorhexidine digluconate 7.1% gel for newborn cord  
13 care to 36,404 newborns in Sokoto State, Nigeria: Initial lessons learned. *PLoS One*  
14 [Internet]. 2015 [cited 2020 Jun 10];10(7):e0134040. Available from:  
15 [http://www.plosone.org/article/fetchObject.action?uri=info:doi/10.1371/journal.pone.0](http://www.plosone.org/article/fetchObject.action?uri=info:doi/10.1371/journal.pone.0134040&representation=PDF)  
16 [134040&representation=PDF](http://www.plosone.org/article/fetchObject.action?uri=info:doi/10.1371/journal.pone.0134040&representation=PDF)  
17  
18  
19
- 20  
21 34. Disu EA, Ferguson IC, Njokanma OF, Anga LA, Solarin AU, Olutekunbi AO, et al.  
22 National neonatal resuscitation training program in Nigeria (2008-2012): a preliminary  
23 report. *Niger J Clin Pract*. 2015 Jan 1;18(1):102–9.  
24  
25  
26
- 27  
28 35. Kwast BE. Reduction of maternal and perinatal mortality in rural and peri-urban  
29 settings: what works? *Eur J Obstet Gynecol Reprod Biol* [Internet]. 1996;69(1):47–53.  
30 Available from: <http://www.elsevier.com/locate/ejogrb>  
31  
32
- 33  
34 36. Eluwa GI, Adebajo SB, Torpey K, Shittu O, Abdu-Aguye S, Pearlman D, et al. The  
35 effects of centering pregnancy on maternal and fetal outcomes in northern Nigeria; a  
36 prospective cohort analysis. *BMC Pregnancy Childbirth* [Internet]. 2018 May 11 [cited  
37 2020 Jun 10];18(1):158. Available from: <https://doi.org/10.1186/s12884-018-1805-2>  
38  
39  
40
- 41  
42 37. Sam-Agudu NA, Ramadhani HO, Isah C, Ereka S, Fan-Osuala C, Anaba U, et al.  
43 The Impact of Structured Mentor Mother Programs on Presentation for Early Infant  
44 Diagnosis Testing in Rural North-Central Nigeria: A Prospective Paired Cohort Study.  
45 *J Acquir Immune Defic Syndr*. 2017 Jun;75 Suppl 2:S182–9.  
46  
47
- 48  
49 38. Qureshi AM, Oche OM, Sadiq UA, Kabiru S. Using community volunteers to promote  
50 exclusive breastfeeding in Sokoto State, Nigeria. *Pan Afr Med J*. 2011;10(8):8.  
51  
52
- 53  
54 39. Davies-Adetugbo AA, Adebawa HA. The Ife South Breastfeeding project: Training  
55 community health extension workers to promote and manage breastfeeding in rural  
56 communities. *Bull World Health Organ*. 1997;75(4):323–32.  
57  
58
- 59  
60 40. Ojofeitimi EO, Elegbe I, Babafemi J. Diet Restriction by pregnant women in Nigeria.

- 1  
2  
3 Int J Gynecol Obstet. 1982 Apr;20(2):99–103.  
4  
5  
6 41. Danmusa S, Coeytaux F, Potts J, Wells E. Expanding Use of Magnesium Sulfate for  
7 Treatment of Pre-eclampsia and Eclampsia Building Towards Scale in Nigeria  
8 [Internet]. 2014 [cited 2020 Jun 9]. Available from:  
9  
10 <https://www.macfound.org/media/files/MagSulfateFINAL.pdf>  
11  
12  
13 42. Maternal Newborn and Child Health Program (MNCH2). Case study No.4: Providing  
14 hard-to-reach communities in northern Nigeria with RMNCH services [Internet]. 2017  
15 [cited 2020 Jun 9]. Available from: [https://www.mnch2.com/wp-](https://www.mnch2.com/wp-content/uploads/2017/03/4-FINAL-SCREEN_Case_Study_Outreach_MNCH2_2017.pdf)  
16  
17 [content/uploads/2017/03/4-FINAL-](https://www.mnch2.com/wp-content/uploads/2017/03/4-FINAL-SCREEN_Case_Study_Outreach_MNCH2_2017.pdf)  
18  
19 [SCREEN\\_Case\\_Study\\_Outreach\\_MNCH2\\_2017.pdf](https://www.mnch2.com/wp-content/uploads/2017/03/4-FINAL-SCREEN_Case_Study_Outreach_MNCH2_2017.pdf)  
20  
21  
22 43. USAID/Maternal and Child Survival Program. Strengthening Newborn Care: Kogi and  
23 Ebonyi states, Nigeria [Internet]. 2018. Available from: <https://www.mcsprogram.org/>  
24  
25  
26 44. Maternal and Child Survival Program (MCSP). Increasing Family Planning Uptake  
27 Among Postpartum Women [Internet]. 2018. Available from:  
28  
29 <https://www.mcsprogram.org/>  
30  
31  
32 45. Maternal Newborn and Child Health Program (MNCH2). Case study No. 6: Male  
33 Motivators in Communities: Uniting Men on the Importance of Women’s Health  
34 [Internet]. 2017 [cited 2020 Jun 9]. Available from: <http://resources.jhpiego.org/>  
35  
36  
37 46. Maternal Newborn and Child Health Program (MNCH2). Case study No. 7: Increasing  
38 the Uptake of Long Acting Reversible Contraception Services in Primary Health  
39 Centres through Competency-based Training The [Internet]. 2016 [cited 2020 Jun 9].  
40 Available from: <http://resources.jhpiego.org/>  
41  
42  
43 47. Abegunde D, Orobato N, Shoretire K, Ibrahim M, Mohammed Z, Abdulazeez J, et al.  
44 Monitoring maternal, newborn, and child health interventions using lot quality  
45 assurance sampling in Sokoto State of northern Nigeria. *Glob Health Action*.  
46 2015;8(1):27526.  
47  
48  
49 48. Mckaig C, Charurat E, Sasser E, Yusuf S, Ishola G, Olorin E. An Assessment of  
50 Integration of Family Planning and Maternal, Newborn and Child Health in Kano,  
51 Nigeria [Internet]. Maryland; 2009 [cited 2020 Jun 9]. Available from:  
52  
53 [www.jhpiego.org](http://www.jhpiego.org)  
54  
55  
56  
57  
58  
59  
60

- 1  
2  
3 49. Kana MA, Doctor HV, Peleteiro B, Lunet N, Barros H, M.A. K, et al. Maternal and  
4 child health interventions in Nigeria: a systematic review of published studies from  
5 1990 to 2014. *BMC Public Health* [Internet]. 2015 Apr [cited 2020 Jun  
6 10];15(334):334. Available from:  
7  
8 <https://www.ncbi.nlm.nih.gov/pmc/articles/PMC4429684/#MOESM1>  
9  
10  
11
- 12 50. Abdul-Hadi RA, Abass MM, Aiyenigba BO, Oseni LO, Odafe S, Chabikuli ON, et al.  
13 The effectiveness of community based distribution of injectable contraceptives using  
14 community health extension workers in Gombe State, Northern Nigeria. *Afr J Reprod*  
15 *Health*. 2013;17(2):80–8.  
16  
17  
18
- 19 51. Speizer IS, Corroon M, Calhoun L, Lance P, Montana L, Nanda P, et al. Demand  
20 generation activities and modern contraceptive use in urban areas of four countries: A  
21 longitudinal evaluation. *Glob Heal Sci Pract* [Internet]. 2014 Dec 1 [cited 2020 Jul  
22 1];2(4):410–26. Available from: </pmc/articles/PMC4307858/?report=abstract>  
23  
24  
25  
26
- 27 52. Hotchkiss DR, Godha D, Do M. Effect of an expansion in private sector provision of  
28 contraceptive supplies on horizontal inequity in modern contraceptive use: Evidence  
29 from Africa and Asia. *Int J Equity Health* [Internet]. 2011 [cited 2020 Jul 1];10:33.  
30 Available from: </pmc/articles/PMC3171310/?report=abstract>  
31  
32  
33  
34
- 35 53. Fayemi M, Momoh G, Oduola O, Delano G, Ladipo O, Adebola O. Community based  
36 distribution agents' approach to provision of family planning information and services  
37 in five Nigerian states: A mirage or a reality? *African J Prim Heal Care Fam Med*  
38 [Internet]. 2011 [cited 2020 Jul 1];3(1). Available from:  
39 </pmc/articles/PMC4565418/?report=abstract>  
40  
41  
42  
43
- 44 54. Ogu R, Okonofua F, Hammed A, Okpokunu E, Mairiga A, Bako A, et al. Outcome of  
45 an intervention to improve the quality of private sector provision of postabortion care  
46 in northern Nigeria. *Int J Gynecol Obstet*. 2012;118(SUPPL. 2):2–7.  
47  
48  
49
- 50 55. Mens PF, Scheelbeek PF, Al Atabbi H, Enato EF. Peer education: The effects on  
51 knowledge of pregnancy related malaria and preventive practices in women of  
52 reproductive age in Edo State, Nigeria. *BMC Public Health* [Internet]. 2011 [cited  
53 2020 Jul 1];11:610. Available from: </pmc/articles/PMC3162527/?report=abstract>  
54  
55  
56
- 57 56. McNabb M, Chukwu E, Ojo O, Shekhar N, Gill CJ, Salami H, et al. Assessment of the  
58 quality of antenatal care services provided by health workers using a mobile phone  
59  
60



- 1  
2  
3 decision support application in northern Nigeria: A pre/post-intervention study. PLoS  
4 One [Internet]. 2015 May 5 [cited 2020 Jul 2];10(5). Available from:  
5  
6 /pmc/articles/PMC4420494/?report=abstract  
7  
8
- 9 57. Anyaehie U, Nwagha U, Aniebue P, Nwagha T. The effect of free distribution of  
10 insecticide-treated nets on asymptomatic Plasmodium parasitemia in pregnant and  
11 nursing mothers in a rural Nigerian community. Niger J Clin Pract [Internet]. 2011 Jan  
12 [cited 2020 Jul 2];14(1):19. Available from:  
13  
14 http://www.njconline.com/text.asp?2011/14/1/19/79234  
15  
16
- 17 58. Kabo I, Otolorin E, Williams E, Orobato N, Abdullahi H, Sadauki H, et al.  
18 Monitoring maternal and newborn health outcomes in Bauchi State, Nigeria: An  
19 evaluation of a standards-based quality improvement intervention. Int J Qual Heal  
20 Care. 2016 Oct;28(5):566–72.  
21  
22
- 23 59. Chabikuli NO, Awi DD, Chukwujekwu O, Abubakar Z, Gwarzo U, Ibrahim M, et al.  
24 The use of routine monitoring and evaluation systems to assess a referral model of  
25 family planning and HIV service integration in Nigeria. AIDS [Internet]. 2009 Nov  
26 [cited 2020 Jul 2];23(SUPPL. 1):S97–103. Available from:  
27  
28 http://journals.lww.com/00002030-200911001-00011  
29  
30
- 31 60. Kalu CA, Umeora O, Sunday-Adeoye I. Review of Post-Abortion Care in South-  
32 Eastern Nigeria. Afr J Reprod Health. 2012;16(1):105.  
33  
34
- 35 61. Joseph O, Biodun O, Michael E. Pregnancy outcome among HIV positive women  
36 receiving antenatal HAART versus untreated maternal HIV infection. J Coll  
37 Physicians Surg Pakistan [Internet]. 2011 [cited 2020 Jul 2];21(6):356–9. Available  
38 from: <https://pubmed.ncbi.nlm.nih.gov/21711992/>  
39  
40
- 41 62. Ojengbede OA, Morhason-Bello IO, Galadanci H, Meyer C, Nsima D, Camlin C, et al.  
42 Assessing the role of the non-pneumatic anti-shock garment in reducing mortality from  
43 postpartum hemorrhage in Nigeria. Gynecol Obstet Invest [Internet]. 2011 [cited 2020  
44 Jul 2];71(1):66–72. Available from: [www.karger.com](http://www.karger.com)  
45  
46
- 47 63. Chiwuzie J, Okojie O, Okolocha C, Omorogbe S, Oronsaye A, Akpala W, et al.  
48 Emergency loan funds to improve access to obstetric care in Ekpoma, Nigeria. Int J  
49 Gynecol Obstet. 1997;59(SUPPL. 2):0–5.  
50  
51  
52  
53  
54  
55  
56  
57  
58  
59  
60

- 1  
2  
3  
4  
5  
6  
7  
8  
9  
10  
11  
12  
13  
14  
15  
16  
17  
18  
19  
20  
21  
22  
23  
24  
25  
26  
27  
28  
29  
30  
31  
32  
33  
34  
35  
36  
37  
38  
39  
40  
41  
42  
43  
44  
45  
46  
47  
48  
49  
50  
51  
52  
53  
54  
55  
56  
57  
58  
59  
60
64. Tukur J, Ahonsi B, Mohammed Ishaku S, Araoyinbo I, Okereke E, Babatunde AO. Maternal and fetal outcomes after introduction of magnesium sulphate for treatment of preeclampsia and eclampsia in selected secondary facilities: A low-cost intervention. *Matern Child Health J.* 2013;17(7):1191–8.
  65. Prata N, Ejembi C, Fraser A, Shittu O, Minkler M. Community mobilization to reduce postpartum hemorrhage in home births in northern Nigeria. *Soc Sci Med [Internet].* 2012 Apr [cited 2020 Jul 27];74(8):1288–96. Available from: <https://pubmed.ncbi.nlm.nih.gov/22377106/>
  66. Hunyinbo K, Fawole A, Sotiloye O, Otolorin E. Evaluation of criteria-based clinical audit in improving quality of obstetric care in a developing country hospital. *Afr J Reprod Health [Internet].* 2008 [cited 2020 Jul 3];12(3):59-70 12p. Available from: <http://www.bioline.org.br/pdf?rh08038>
  67. Okonofua FE, Ogu RN, Fabamwo AO, Ujah IO, Chama CM, Archibong EI, et al. Training health workers for magnesium sulfate use reduces case fatality from eclampsia: Results from a multicenter trial. *Acta Obstet Gynecol Scand.* 2013;92(6):716–20.
  68. Igwegbe AO, Eleje GU, Ugboaja JO, Ofiaeli RO. Improving maternal mortality at a university teaching hospital in Nnewi, Nigeria. *Int J Gynecol Obstet [Internet].* 2012;116(3):197–200. Available from: <http://www.elsevier.com/locate/ijgo>
  69. Singh K, Khan SM, Carvajal-Aguirre L, Brodish P, Amouzou A, Moran A. The importance of skin-to-skin contact for early initiation of breastfeeding in Nigeria and Bangladesh. *J Glob Health [Internet].* 2017 Dec [cited 2020 Jun 10];7(2):20505. Available from: [www.jogh.org](http://www.jogh.org)
  70. Galadanci H, Künzel W, Shittu O, Zinser R, Gruhl M, Adams S. Obstetric quality assurance to reduce maternal and fetal mortality in Kano and Kaduna State hospitals in Nigeria. *Int J Gynecol Obstet.* 2011;114(1):23–8.
  71. Gummi BF, Hassan M, Shehu D, Audu L. Community education to encourage use of emergency obstetric services, Kebbi State, Nigeria. *Int J Gynecol Obstet.* 1997;59(SUPPL. 2):S191–200.
  72. Miller S, Ojengbede O, Turan JM, Morhason-Bello IO, Martin HB, Nsima D. A

- 1  
2  
3 comparative study of the non-pneumatic anti-shock garment for the treatment of  
4 obstetric hemorrhage in Nigeria. *Int J Gynecol Obstet*. 2009;107(2):121–5.  
5  
6  
7  
8 73. Odusanya OO, Alufohai JE, Meurice FP, Clemens R, Ahonkhai VI. Short term  
9 evaluation of a rural immunization program in Nigeria. *J Natl Med Assoc*. 2003  
10 Feb;95(2):175–9.  
11  
12  
13 74. Amoran O. Impact of health education intervention on malaria prevention practices  
14 among nursing mothers in rural communities in Nigeria. *Niger Med J [Internet]*. 2013  
15 [cited 2020 Jul 6];54(2):115. Available from:  
16 <https://www.ncbi.nlm.nih.gov/pmc/articles/PMC3687863/>  
17  
18  
19  
20 75. Okonofua F, Lambo E, Okeibunor J, Agholor K. Advocacy for free maternal and child  
21 health care in Nigeria-Results and outcomes. *Health Policy (New York)*. 2011 Feb  
22 1;99(2):131–8.  
23  
24  
25  
26 76. Findley SE, Uwemedimo OT, Doctor H V., Green C, Adamu F, Afenyadu GY.  
27 Comparison of high- versus low-intensity community health worker intervention to  
28 promote newborn and child health in Northern Nigeria. *Int J Womens Health*  
29 [Internet]. 2013 Oct 25 [cited 2020 Jul 6];5(1):717–28. Available from:  
30 <https://www.ncbi.nlm.nih.gov/pmc/articles/PMC3814931/>  
31  
32  
33  
34  
35 77. Pathfinder International. The Maternal Health Care Improvement Initiative : Nigeria  
36 [Internet]. 2011 [cited 2020 Jul 6]. Available from:  
37 [https://www.pathfinder.org/publications/maternal-health-care-improvement-initiative-](https://www.pathfinder.org/publications/maternal-health-care-improvement-initiative-nigeria/)  
38 [nigeria/](https://www.pathfinder.org/publications/maternal-health-care-improvement-initiative-nigeria/)  
39  
40  
41  
42  
43 78. Galadanci HS, Idris SA, Sadauki HM, Yakasai IA. Programs and policies for reducing  
44 maternal mortality in Kano State, Nigeria: a review: original research article. *Afr J*  
45 *Reprod Health [Internet]*. 2010;14(Special issue 3):31–6. Available from:  
46 <https://journals.co.za/content/ajrh/14/si-3/EJC123348>  
47  
48  
49  
50 79. Charurat E, Nasir B, Airede RL, Abdu-Aguye S, Emmanuel O, McKaig C. Postpartum  
51 Systematic Screening in Northern Nigeria : A Practical Application of Family Planning  
52 and Maternal Newborn and Child Health Integration [Internet]. USAID-ACCESS-FP  
53 Report. 2010 [cited 2020 Jul 7]. Available from:  
54 [http://resources.jhpiego.org/system/files/resources/ACCESS-](http://resources.jhpiego.org/system/files/resources/ACCESS-FP_Nigeria_PPSS_Report.pdf)  
55 [FP\\_Nigeria\\_PPSS\\_Report.pdf](http://resources.jhpiego.org/system/files/resources/ACCESS-FP_Nigeria_PPSS_Report.pdf)  
56  
57  
58  
59  
60

- 1  
2  
3  
4  
5  
6  
7  
8  
9  
10  
11  
12  
13  
14  
15  
16  
17  
18  
19  
20  
21  
22  
23  
24  
25  
26  
27  
28  
29  
30  
31  
32  
33  
34  
35  
36  
37  
38  
39  
40  
41  
42  
43  
44  
45  
46  
47  
48  
49  
50  
51  
52  
53  
54  
55  
56  
57  
58  
59  
60
80. Omole O, Ijadunola MY, Olotu E, Omotoso O, Bello B, Awoniran O, et al. The effect of mobile phone short message service on maternal health in south-west Nigeria. *Int J Health Plann Manage* [Internet]. 2018 Jan;33(1):155–70. Available from: <https://onlinelibrary.wiley.com/doi/full/10.1002/hpm.2404>
  81. Okoli U, Morris L, Oshin A, Pate MA, Aigbe C, Muhammad A, et al. Conditional cash transfer schemes in Nigeria: Potential gains for maternal and child health service uptake in a national pilot programme. *BMC Pregnancy Childbirth* [Internet]. 2014 Dec [cited 2020 Jun 10];14(1):408. Available from: <http://www.biomedcentral.com/1471-2393/14/408>
  82. Liu JX, Shen J, Wilson N, Janumpalli S, Stadler P, Padian N. Conditional cash transfers to prevent mother-to-child transmission in low facility-delivery settings: evidence from a randomised controlled trial in Nigeria. *BMC Pregnancy Childbirth*. 2019 Jan;19(1):32.
  83. Edu BC, Agan TU, Monjok E, Makowiecka K. Effect of free maternal health care program on health-seeking behavior of women during pregnancy, intra-partum and postpartum periods in Cross River State of Nigeria: A mixed method study. *Maced J Med Sci* [Internet]. 2017;5(3):370–82. Available from: <https://www.idpress.eu/mjms/article/download/oamjms.2017.075/1419>
  84. Noguchi L, Grenier L, Kabue M, Ugwa E, Oyetunji J, Suhowatsky S, et al. Effect of group versus individual antenatal care on uptake of intermittent prophylactic treatment of malaria in pregnancy and related malaria outcomes in Nigeria and Kenya: Analysis of data from a pragmatic cluster randomized trial. *Malar J* [Internet]. 2020;19(1):51. Available from: <http://www.malariajournal.com/home/>
  85. Oguntunde O, Yusuf FM, Nyenwa J, Dauda DS, Salihu A, Sinai I. Emergency transport for obstetric emergencies: Integrating community-level demand creation activities for improved access to maternal, newborn, and child health services in northern nigeria. *Int J Womens Health* [Internet]. 2018;10:773–82. Available from: <https://www.dovepress.com/getfile.php?fileID=46600>
  86. A.B. L, Lalonde AB, Grellier R. FIGO saving mothers and newborns initiative 2006-2011. *Int J Gynecol Obstet* [Internet]. 2012;119(SUPPL.1):S18–21. Available from: <http://www.elsevier.com/locate/ijgo>

- 1  
2  
3  
4  
5  
6  
7  
8  
9  
10  
11  
12  
13  
14  
15  
16  
17  
18  
19  
20  
21  
22  
23  
24  
25  
26  
27  
28  
29  
30  
31  
32  
33  
34  
35  
36  
37  
38  
39  
40  
41  
42  
43  
44  
45  
46  
47  
48  
49  
50  
51  
52  
53  
54  
55  
56  
57  
58  
59  
60
87. Okeke E, Glick P, Chari A, Abubakar IS, Pitchforth E, Exley J, et al. The effect of increasing the supply of skilled health providers on pregnancy and birth outcomes: evidence from the midwives service scheme in Nigeria. *BMC Health Serv Res*. 2016;16:425.
  88. Ameh CA, Kerr R, Madaj B, Mdegela M, Kana T, Jones S, et al. Knowledge and skills of healthcare providers in sub-Saharan Africa and Asia before and after competency-based training in emergency obstetric and early Newborn Care. *PLoS One* [Internet]. 2016;11(12):e0167270. Available from: <http://journals.plos.org/plosone/article/file?id=10.1371>
  89. Brals B, Aderibigbe S., Wit F., van Ophem JCM, van der List M, Osagbemi GK, et al. The effect of health insurance and health facility-upgrades on hospital deliveries in rural Nigeria: a controlled interrupted time-series study. *Health Policy Plan* [Internet]. 2017;32(7):990–1001. Available from: <https://www.ncbi.nlm.nih.gov/pmc/articles/PMC5886299/>
  90. Okeke EN, Pitchforth E, Exley J, Glick P, Abubakar IS, Chari AV, et al. Going to scale: design and implementation challenges of a program to increase access to skilled birth attendants in Nigeria. *BMC Health Serv Res* [Internet]. 2017;17(1):356. Available from: <https://bmchealthservres.biomedcentral.com/articles/10.1186/s12913-017-2284-2>
  91. Okereke E, Tukur J, Aminu A, Butera J, Mohammed B, Tanko M, et al. An innovation for improving maternal, newborn and child health (MNCH) service delivery in Jigawa State, northern Nigeria: a qualitative study of stakeholders' perceptions about clinical mentoring. *BMC Health Serv Res* [Internet]. 2015 Feb [cited 2020 Jun 10];15(64):64. Available from: <https://bmchealthservres.biomedcentral.com/articles/10.1186/s12913-015-0724-4>
  92. Oguntunde O, Nyenwa J, Yusuf FM, Dauda DS, Salihu A, Sinai I. The experience of men who participated in interventions to improve demand for and utilization of maternal and child health services in northern Nigeria: A qualitative comparative study. *Reprod Health* [Internet]. 2019;16(1):104. Available from: <http://www.reproductive-health-journal.com/home/>
  93. Adaji SE, Jimoh A, Bawa U, Ibrahim HI, Olorukooba AA, Adelaiye H, et al. Women's

- 1  
2  
3 experience with group prenatal care in a rural community in northern Nigeria. *Int J*  
4 *Gynecol Obstet* [Internet]. 2019;145(2):164–9. Available from:  
5 [http://obgyn.onlinelibrary.wiley.com/hub/journal/10.1002/\(ISSN\)1879-3479/](http://obgyn.onlinelibrary.wiley.com/hub/journal/10.1002/(ISSN)1879-3479/)  
6  
7  
8  
9 94. Onwujekwe O, Obi F, Ichoku H, N E, Okeke C, Ezenwaka U, et al. Assessment of a  
10 Free Maternal and Child Health Program and the Prospects for Program Re-Activation  
11 and Scale-Up using a New Health Fund in Nigeria. *Niger J Clin Pract* [Internet].  
12 2019;22(11):1516–29. Available from: [www.njcponline](http://www.njcponline)  
13  
14  
15  
16 95. Brown VB, Oluwatosin OA, Akinyemi JO, Adeyemo AA. Effects of Community  
17 Health Nurse-Led Intervention on Childhood Routine Immunization Completion in  
18 Primary Health Care Centers in Ibadan, Nigeria. *J Community Health*. 2016  
19 Apr;41(2):265–73.  
20  
21  
22  
23 96. Asa OO, Onayade AA, Fatusi AO, Ijadunola KT, Abiona TC. Efficacy of intermittent  
24 preventive treatment of malaria with sulphadoxine-pyrimethamine in preventing  
25 anaemia in pregnancy among Nigerian women. *Matern Child Health J*.  
26 2008;12(6):692–8.  
27  
28  
29  
30  
31 97. Walker JA, Hashim Y, Oranye N. Impact of Muslim opinion leaders' training of  
32 healthcare providers on the uptake of MNCH services in Northern Nigeria. *Glob*  
33 *Public Health* [Internet]. 2019;14(2):200–13. Available from:  
34 <http://www.tandf.co.uk/journals/titles/17441692.asp>  
35  
36  
37  
38 98. Ehigiegba A, Adibe N, Ekott M, Fakunle B, Fajola A. Making community and clinic-  
39 based PMTCT services more accessible: The role of a community health insurance  
40 scheme: A Nigerian Cottage hospital experience. *J Med Biomed Res* [Internet].  
41 2012;11(2):69–75. Available from:  
42 <http://www.ajol.info/index.php/jmbr/article/view/86098/75907>  
43  
44  
45  
46 99. Adeleye OA, Aldoory L, Parakoyi DB, Parakoyi BD. Using local culture and gender  
47 roles to improve male involvement in maternal health in Southern Nigeria. *J Health*  
48 *Commun* [Internet]. 2011 Nov 1 [cited 2020 Jul 6];16(10):1122–35. Available from:  
49 <https://www.tandfonline.com/doi/abs/10.1080/10810730.2011.571340>  
50  
51  
52  
53 100. Haver J, Brieger W, Zoungrana J, Ansari N, Kagoma J. Experiences engaging  
54 community health workers to provide maternal and newborn health services:  
55 Implementation of four programs. *Int J Gynecol Obstet* [Internet]. 2015;130(S2):S32–  
56  
57  
58  
59  
60

- 1  
2  
3 9. Available from: <http://www.elsevier.com/locate/ijgo>  
4  
5  
6 101. Okeibunor JC, Orji BC, Brieger W, Ishola G, Otolorin E, Rawlins B, et al. Preventing  
7 malaria in pregnancy through community-directed interventions: Evidence from Akwa  
8 Ibom State, Nigeria. *Malar J* [Internet]. 2011 [cited 2020 Jul 2];10:227. Available  
9 from: [/pmc/articles/PMC3161917/?report=abstract](https://pubmed.ncbi.nlm.nih.gov/25217416/)  
10  
11  
12  
13 102. Findley SE, Doctor H V, Ashir GM, Kana MA, Mani AS, Green C, et al.  
14 Reinvigorating health systems and community-based services to improve maternal  
15 health outcomes: case study from northern Nigeria. *J Prim Care Community Health*  
16 [Internet]. 2015 Apr 12 [cited 2020 Jun 10];6(2):88–99. Available from:  
17 <http://www.ncbi.nlm.nih.gov/pubmed/25217416>  
18  
19  
20  
21  
22 103. Leight J, Sharma V, Brown W, Costica L, Abdulaziz Sule F, Bjorkman Nyqvist M, et  
23 al. Associations between birth kit use and maternal and neonatal health outcomes in  
24 rural Jigawa state, Nigeria: A secondary analysis of data from a cluster randomized  
25 controlled trial. *PLoS One* [Internet]. 2018 [cited 2020 Jun 10];13(12):e0208885.  
26 Available from: <https://doi.org/10.1371/journal.pone.0208885>  
27  
28  
29  
30  
31 104. Chou D, Daelmans B, Jolivet RR, Kinney M, Say L. Ending preventable maternal and  
32 newborn mortality and stillbirths. *BMJ*. 2015 Sep 14;351:19–22.  
33  
34  
35  
36 105. The African Academy of Sciences, The Academy of Medical Sciences. From minding  
37 the gap to closing the gap: Science to transform maternal and newborn survival and  
38 stillbirths in sub-Saharan Africa in the Sustainable Development Goals era. Nairobi;  
39 2018.  
40  
41  
42  
43 106. Marincola E, Kariuki T. Quality Research in Africa and Why it is Important. *ACS*  
44 *Omega* [Internet]. 2020 [cited 2021 Jan 8];5(38):24155–7. Available from:  
45 [https://www.aasciences.africa/sites/default/files/Publications/Quality Research in](https://www.aasciences.africa/sites/default/files/Publications/Quality%20Research%20in%20Africa%20and%20Why%20It%20Is%20Important.pdf)  
46 [Africa and Why It Is Important.pdf](https://www.aasciences.africa/sites/default/files/Publications/Quality Research in)  
47  
48  
49  
50  
51 107. Tunçalp, Were WM, MacLennan C, Oladapo OT, Gülmezoglu AM, Bahl R, et al.  
52 Quality of care for pregnant women and newborns - The WHO vision. *BJOG An Int J*  
53 *Obstet Gynaecol*. 2015 Jul;122(8):1045–9.  
54  
55  
56  
57 108. Bohren MA, Mehrtash H, Fawole B, Maung TM, Balde MD, Maya E, et al. How  
58 women are treated during facility-based childbirth in four countries: a cross-sectional  
59  
60

1  
2  
3 study with labour observations and community-based surveys. Lancet. 2019  
4  
5 Nov;394(10210):1750–63.  
6

- 7  
8 109. Sacks E, Mehrtash H, Bohren M, Balde MD, Vogel JP, Adu-Bonsaffoh K, et al. The  
9 first 2 h after birth: prevalence and factors associated with neonatal care practices from  
10 a multicountry, facility-based, observational study. Lancet Glob Heal. 2021  
11 Jan;9(1):e72–80.  
12  
13  
14  
15  
16  
17  
18  
19  
20  
21  
22  
23  
24  
25  
26  
27  
28  
29  
30  
31  
32  
33  
34  
35  
36  
37  
38  
39  
40  
41  
42  
43  
44  
45  
46  
47  
48  
49  
50  
51  
52  
53  
54  
55  
56  
57  
58  
59  
60

For peer review only



1  
2  
3  
4  
5  
6  
7  
8  
9  
10  
11  
12  
13  
14  
15  
16  
17  
18  
19  
20  
21  
22  
23  
24  
25  
26  
27  
28  
29  
30  
31  
32  
33  
34  
35  
36  
37  
38  
39  
40  
41  
42  
43  
44  
45  
46  
47  
48  
49  
50  
51  
52  
53  
54  
55  
56  
57  
58  
59  
60

For peer review only

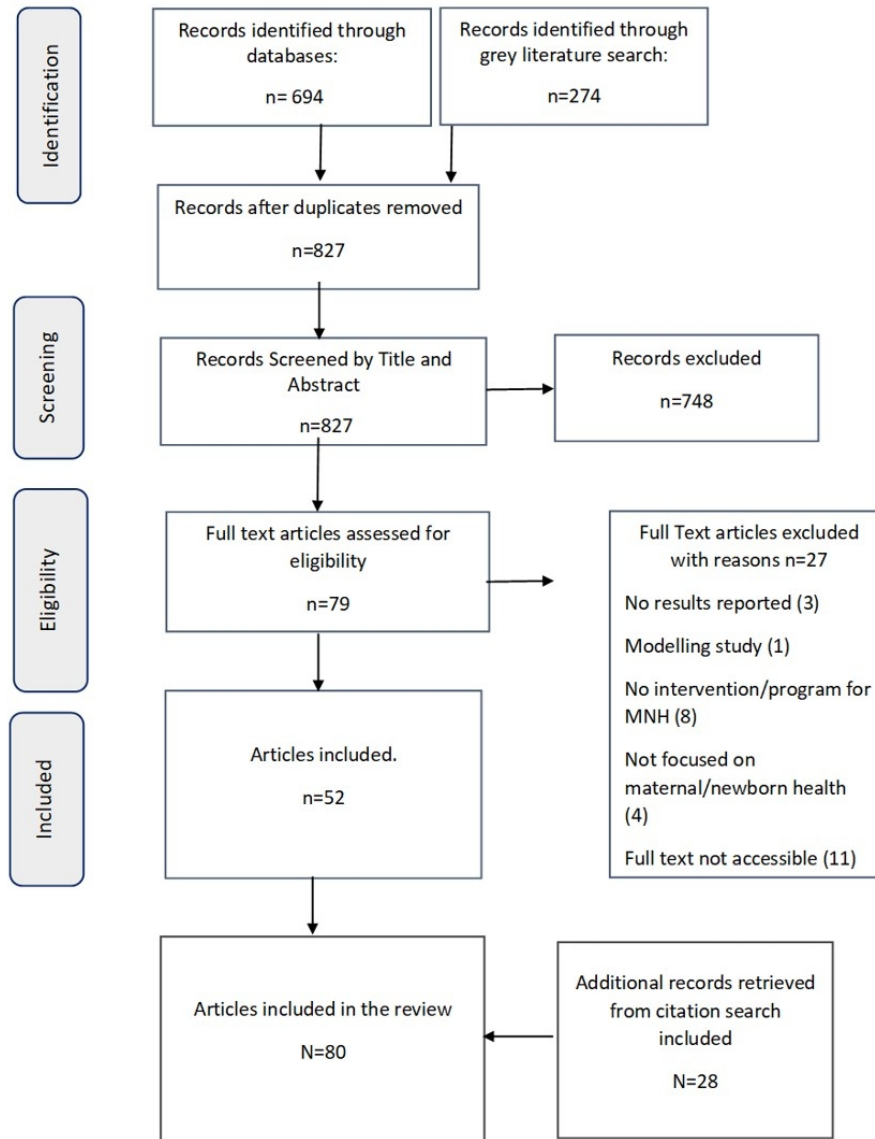

Flow chart of the selection process of sources of evidence.

145x190mm (149 x 149 DPI)

| WHO INTERVENTIONS FOR MATERNAL AND NEWBORN HEALTH |                                                                                                                                                                                                                                                                           |                                                                                                                                                                                                                                                                                                                                                                                                                                     |                                                                                                                                                                                         |                                                                                                                                                                                                                                                 |                                                                                                                                                                                                   |                                                                                                                                                                                                                                           |              |
|---------------------------------------------------|---------------------------------------------------------------------------------------------------------------------------------------------------------------------------------------------------------------------------------------------------------------------------|-------------------------------------------------------------------------------------------------------------------------------------------------------------------------------------------------------------------------------------------------------------------------------------------------------------------------------------------------------------------------------------------------------------------------------------|-----------------------------------------------------------------------------------------------------------------------------------------------------------------------------------------|-------------------------------------------------------------------------------------------------------------------------------------------------------------------------------------------------------------------------------------------------|---------------------------------------------------------------------------------------------------------------------------------------------------------------------------------------------------|-------------------------------------------------------------------------------------------------------------------------------------------------------------------------------------------------------------------------------------------|--------------|
| SOCIAL DETERMINANTS OF MATERNAL HEALTH            | INTERMEDIATE                                                                                                                                                                                                                                                              | <b>Health Systems:</b><br><i>Availability of services (FP, ANC, postnatal care, EMoC, blood, referral). Acceptability to community. Accessibility: distance, fees, related costs, medicines, and supplies. Quality of care: staff skills, technical competence.</i>                                                                                                                                                                 | Family Planning                                                                                                                                                                         | Management of unintended pregnancy. Maternal health screening. Tetanus immunization. External cephalic version. Induction of labour. Antibiotics for preterm labour. Corticosteroids for respiratory distress. Magnesium Sulphate for eclampsia | Induction of labour for prolonged pregnancy. PPH prevention. Active management of third stage of labour. Management of PPH. Caesarean section and prophylactic antibiotics                        | Family Planning. Immediate thermal care. Neonatal resuscitation by professional worker. Kangaroo Mother Care for preterm/small babies. CPAP. Presumptive antibiotic for newborns at risk. Extra support for feeding small/preterm babies. | Immunization |
|                                                   |                                                                                                                                                                                                                                                                           | <b>Community context:</b><br><i>Awareness of care. Perceived severity and cause, Rural/urban residence, Social capital.</i>                                                                                                                                                                                                                                                                                                         | Home Visits                                                                                                                                                                             |                                                                                                                                                                                                                                                 |                                                                                                                                                                                                   |                                                                                                                                                                                                                                           |              |
|                                                   |                                                                                                                                                                                                                                                                           | <b>Family and Peer Influence:</b><br><i>Family structure and decision making. Marital relationship/Spousal communication. Income/Access to resources. Support networks.</i>                                                                                                                                                                                                                                                         | Male involvement interventions for MNH<br>Companion of choice during labor and childbirth<br>Participatory learning/action with women's groups<br>Community organised transport schemes |                                                                                                                                                                                                                                                 |                                                                                                                                                                                                   |                                                                                                                                                                                                                                           |              |
|                                                   | <b>Biological context:</b><br><i>age, parity, health conditions, nutrition, pregnancy history. Behavioural: self-efficacy, knowledge, harmful practices, pre/intra/post care.</i>                                                                                         | Prevention and management of STI and HIV. Folic Acid supplementation                                                                                                                                                                                                                                                                                                                                                                | Birth and emergency preparedness<br>Counselling on FP<br>Prevent/manage HIV<br>Prevent/manage malaria<br>Prevent pre-eclampsia<br>Smoking cessation                                     |                                                                                                                                                                                                                                                 | Prevent/treat anaemia<br>Detect/manage sepsis<br>Screen/initiate/continue ARVs for HIV.<br>Hygiene cord and skin care<br>Initiation of exclusive breastfeeding.<br>Case management of infections. | Exclusive breastfeeding<br>Complimentary feeding after 6mths.<br>Vitamin A supplementation.<br>Prevent/manage infections.<br>Management of severe acute malnutrition.<br>Comprehensive care of infants exposed to HIV                     |              |
|                                                   | <b>Governance/Policies:</b><br><i>Education, health finance/infrastructure, Occupation, Laws (gender equity, anti-violence, Social protection).</i><br><b>Culture and social values:</b><br><i>Women's status, Gender Norms, Religion Health Beliefs, Social Cohesion</i> | Laws to expand access to family planning and safe abortion.<br>Policies to enhance access to education and lived opportunities.<br>Public policy to provide funding and infrastructure for maternal health.<br>Laws against marital rape, sexual and physical violence, FGM.<br>Prohibition of early or forced marriages.<br>Right to own and inherit property.<br>Social protection mechanisms, national health insurance schemes. |                                                                                                                                                                                         |                                                                                                                                                                                                                                                 |                                                                                                                                                                                                   |                                                                                                                                                                                                                                           |              |
|                                                   |                                                                                                                                                                                                                                                                           | Adolescent Pre-pregnancy                                                                                                                                                                                                                                                                                                                                                                                                            | Pregnancy                                                                                                                                                                               | Childbirth                                                                                                                                                                                                                                      | Postnatal (mother/newborn)                                                                                                                                                                        | Infancy/childhood                                                                                                                                                                                                                         |              |
| <b>CONTINUUM OF CARE APPROACH</b>                 |                                                                                                                                                                                                                                                                           |                                                                                                                                                                                                                                                                                                                                                                                                                                     |                                                                                                                                                                                         |                                                                                                                                                                                                                                                 |                                                                                                                                                                                                   |                                                                                                                                                                                                                                           |              |

Figure 2: Integrated model of the WHO recommendations, continuum of care approach and social determinants of maternal health.

648x410mm (72 x 72 DPI)

|                                        |              | WHO INTERVENTIONS FOR MATERNAL AND NEWBORN HEALTH                                                                                                                                                                                                                              |                                 |                                                                |                                |                                   |                          |                                                      |    |
|----------------------------------------|--------------|--------------------------------------------------------------------------------------------------------------------------------------------------------------------------------------------------------------------------------------------------------------------------------|---------------------------------|----------------------------------------------------------------|--------------------------------|-----------------------------------|--------------------------|------------------------------------------------------|----|
| SOCIAL DETERMINANTS OF MATERNAL HEALTH | INTERMEDIATE | <b>Health Systems:</b><br><i>Availability of services (FP, ANC, postnatal care, EMoC, blood, referral).<br/>Acceptability to community.<br/>Accessibility: distance, fees, related costs, medicines and supplies.<br/>Quality of care: staff skills, technical competence.</i> | 42,46-49,55                     | 20,28,32,37,4<br>9,50,52,56,60<br>,63,64,78,80,<br>83,86,96,97 | 24,31,58,61,6<br>2,68,81,83,86 | 24,30,31,39,75,78                 | 69,75,91                 | 21,23,77,82,84,<br>87,90,98,25,43-<br>45,54,66,72,73 |    |
|                                        |              | <b>Community context:</b><br><i>Awareness of care.<br/>Perceived severity and cause.<br/>Rural/urban residence.<br/>Social capital.</i>                                                                                                                                        |                                 |                                                                |                                |                                   |                          | 67                                                   |    |
|                                        |              | <b>Family and Peer Influence:</b><br><i>Family structure and decision making.<br/>Marital relationship/Spousal communication.<br/>Income/Access to resources.<br/>Support networks.</i>                                                                                        |                                 | 81                                                             | 81                             |                                   |                          |                                                      | 95 |
|                                        |              | <b>Biological context:</b><br><i>age, parity, health conditions, nutrition, pregnancy history.<br/>Behavioural: self-efficacy, knowledge, harmful practices, pre/intra/post care.</i>                                                                                          | 22,70                           | 26,36,51,53,7<br>6,80,89,92,99                                 |                                | 29,34,35,53,65                    | 33                       |                                                      |    |
|                                        |              | <b>Governance/Policies:</b><br><i>Education, health finance/infrastructure, Occupation, Laws (gender equity, anti-violence, Social protection.</i>                                                                                                                             | 71,74,79,85,94                  |                                                                |                                |                                   |                          |                                                      |    |
|                                        | STRUCTURAL   | <b>Culture and social values:</b><br><i>Women's status, Gender Norms, Religion Health Beliefs, Social Cohesion</i>                                                                                                                                                             | 41,88,93                        |                                                                |                                |                                   |                          |                                                      |    |
|                                        |              |                                                                                                                                                                                                                                                                                | <b>Adolescent Pre-pregnancy</b> | <b>Pregnancy</b>                                               | <b>Childbirth</b>              | <b>Postnatal (mother/newborn)</b> | <b>Infancy/childhood</b> | <b>Across the Continuum</b>                          |    |
|                                        |              | <b>CONTINUUM OF CARE APPROACH</b>                                                                                                                                                                                                                                              |                                 |                                                                |                                |                                   |                          |                                                      |    |

Figure 3: Mapping of interventions to the WHO recommendations, continuum of care approach and social determinants of health

571x403mm (72 x 72 DPI)

1  
2  
3  
4  
5  
6  
7  
8  
9  
10  
11  
12  
13  
14  
15  
16  
17  
18  
19  
20  
21  
22  
23  
24  
25  
26  
27  
28  
29  
30  
31  
32  
33  
34  
35  
36  
37  
38  
39  
40  
41  
42  
43  
44  
45  
46  
47  
48  
49  
50  
51  
52  
53  
54  
55  
56  
57  
58  
59  
60

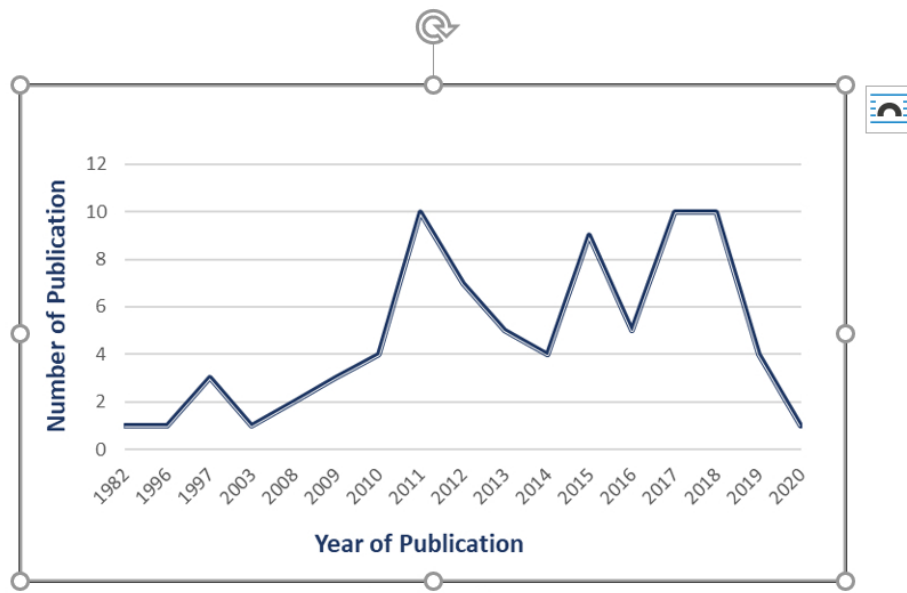

Figure 4: Number of publications per year

Figure 4: Number of publications per year  
390x284mm (57 x 57 DPI)

**Table S1: Data extraction tool and characteristics of included studies.**

| <b>Authors/<br/>Publication<br/>Year &amp;<br/>Lead author<br/>Institution</b> | <b>Geographical<br/>location/<br/>setting/site</b>                                         | <b>Study design<br/>and<br/>Objective(s)</b>                                                                                                                                                                                               | <b>Type of<br/>Intervention</b>                                                                                                                                                                          | <b>Stage in<br/>continuum of<br/>care &amp;<br/>Target<br/>Population(s)</b>                                                                                              | <b>Reported Outcomes<br/>(or<br/>effectiveness/impact)</b>                                                                                                                                                                        | <b>Intended<br/>outcomes<br/>achieved<br/>(Yes/No)</b>                                                                                                                            | <b>Barriers/challenges<br/>and/or Facilitators</b>                                                          |
|--------------------------------------------------------------------------------|--------------------------------------------------------------------------------------------|--------------------------------------------------------------------------------------------------------------------------------------------------------------------------------------------------------------------------------------------|----------------------------------------------------------------------------------------------------------------------------------------------------------------------------------------------------------|---------------------------------------------------------------------------------------------------------------------------------------------------------------------------|-----------------------------------------------------------------------------------------------------------------------------------------------------------------------------------------------------------------------------------|-----------------------------------------------------------------------------------------------------------------------------------------------------------------------------------|-------------------------------------------------------------------------------------------------------------|
| Sloan et al <sup>20</sup><br>(2018)<br><br>International                       | Kano, Katsina<br>and Kaduna<br>(NW)<br>urban and rural<br>community and<br>health facility | Program<br>evaluation<br>(before-after<br>analysis):<br>To evaluate the<br>MNH program<br>impact on<br>reducing<br>women's,<br>neonatal and<br>perinatal<br>mortality and<br>stillbirth                                                    | Integrated<br>maternal and<br>neonatal health<br>program: multiple<br>interventions to<br>address delays in<br>accessing care,<br>provide<br>emergency<br>obstetric care and<br>manage<br>complications. | Pregnancy and<br>childbirth<br><br>Pregnant<br>women and<br>newborns                                                                                                      | Statistically<br>significant declines in<br>Maternal mortality,<br>Stillbirth, Neonatal<br>mortality and<br>Perinatal mortality<br>rates.                                                                                         | Yes:<br>Improvements<br>in maternal<br>and newborn<br>survival<br>observed.                                                                                                       | Facilitators:<br>Promoting local<br>ownership                                                               |
| Oguntunde et<br>al <sup>21</sup> (2018)<br><br>Nigeria                         | Jigawa, Kaduna<br>and Kano (NW)<br>urban<br>health facility                                | Post<br>intervention<br>analysis<br>(qualitative<br>study):<br>To assess the<br>Facility Health<br>Committees<br>established in<br>three states in<br>northern<br>Nigeria as a<br>platform to<br>improve the<br>quality of<br>maternal and | Facility Health<br>committees                                                                                                                                                                            | Across the<br>continuum of<br>care<br><br>Facility health<br>committee<br>members:<br>facility health<br>providers<br>facility clients<br>including<br>pregnant<br>women. | Committee members,<br>health providers, and<br>facility clients all<br>agree that the<br>committees have a<br>tangible positive<br>effect on the<br>provision of maternal<br>and child health<br>services and quality<br>of care. | Yes: Facility<br>health<br>committees<br>appear to have<br>a positive<br>influence on<br>quality of<br>maternal and<br>child health<br>services in the<br>selected<br>facilities. | Barriers: Inadequate<br>funding.<br><br>Facilitators: Gaining<br>trust and support of<br>community members. |

|                                                    |                                                            |                                                                                                                                                                                                              |                                                        |                                                                                    |                                                                                                                                                                                                                                                                                                                                          |                                                                                                                     |                                                                                                     |
|----------------------------------------------------|------------------------------------------------------------|--------------------------------------------------------------------------------------------------------------------------------------------------------------------------------------------------------------|--------------------------------------------------------|------------------------------------------------------------------------------------|------------------------------------------------------------------------------------------------------------------------------------------------------------------------------------------------------------------------------------------------------------------------------------------------------------------------------------------|---------------------------------------------------------------------------------------------------------------------|-----------------------------------------------------------------------------------------------------|
|                                                    |                                                            | child health services.                                                                                                                                                                                       |                                                        |                                                                                    |                                                                                                                                                                                                                                                                                                                                          |                                                                                                                     |                                                                                                     |
| Eluwa et al <sup>32</sup> (2018)<br><br>Nigeria    | Kano (NW) urban health facility                            | Quasi-experimental design: To assess the effect of centering pregnancy group (CPG) antenatal care on the uptake of antenatal care (ANC), facility delivery and immunization rates for infants in Kano state. | Centering Pregnancy-group prenatal care program        | Pregnancy<br><br>Pregnant women 15–49 years of age and newborns.                   | Statistically significant improvement in proportion of women attending ANC at least once in the 2nd and 3rd trimester in intervention versus control group. More women in the intervention group had a health facility delivery, were more likely to immunize babies at 6 and 14 weeks and more likely to use postnatal health services. | Yes: Intervention had a positive effect on the use of antenatal services, facility delivery and postnatal services. | Barriers: lack of trust in health system, strong influence of socio-cultural beliefs and practices. |
| Abegunde et al <sup>43</sup> (2015)<br><br>Nigeria | Sokoto (NW). urban and rural community and health facility | Program evaluation-outcome: To assess the impact of interventions implemented between 2012 and 2013.                                                                                                         | Integrated management of (MNCH)/FP/reproductive health | Across the continuum of care<br><br>women, newborns and children under 5yrs of age | None of the nine indicators associated with the continuum of maternal, neonatal, and child care satisfied the recommended 90% coverage target for achieving MDGs 4 and 5.                                                                                                                                                                | No: The majority of the LGAs did not meet intended targets and require intensified program/intervention.            | Barriers: Low quality data for planning the program.                                                |

|                                                                    |                                                                                                                              |                                                                                                                                                                                                                                                                                 |                                                                               |                                                                              |                                                                                                                                                                                                                                                                                                                                                                                                                               |                                                                                                                                                                                                                                                                                                                         |                                                                                                                                                   |
|--------------------------------------------------------------------|------------------------------------------------------------------------------------------------------------------------------|---------------------------------------------------------------------------------------------------------------------------------------------------------------------------------------------------------------------------------------------------------------------------------|-------------------------------------------------------------------------------|------------------------------------------------------------------------------|-------------------------------------------------------------------------------------------------------------------------------------------------------------------------------------------------------------------------------------------------------------------------------------------------------------------------------------------------------------------------------------------------------------------------------|-------------------------------------------------------------------------------------------------------------------------------------------------------------------------------------------------------------------------------------------------------------------------------------------------------------------------|---------------------------------------------------------------------------------------------------------------------------------------------------|
| <p>Kabo et al<sup>54</sup><br/>(2016)<br/><br/>Nigeria</p>         | <p>Bauchi State<br/>(NE)<br/>urban<br/>health facility</p>                                                                   | <p>Program<br/>evaluation-<br/>process and<br/>outcome:<br/>To assess<br/>whether<br/>increased<br/>compliance<br/>with set<br/>performance<br/>standards was<br/>associated with<br/>improved<br/>maternal and<br/>neonatal<br/>outcomes</p>                                   | <p>Standards-Based<br/>Management and<br/>Recognition<br/>(SBM-R) program</p> | <p>Across the<br/>continuum of<br/>care<br/>Health service<br/>providers</p> | <p>An increase in the<br/>percentage of SBM-R<br/>standards for MNH<br/>achieved was<br/>observed for 3 years<br/>in succession after the<br/>implementation of<br/>SBM-R at all 23<br/>facilities. In addition,<br/>a decline in MMR and<br/>NMR observed, along<br/>with an increase in the<br/>active management of<br/>third stage of labor<br/>and a decline in the<br/>incidence of<br/>postpartum<br/>haemorrhage.</p> | <p>Yes:<br/>Intervention<br/>helped health<br/>facilities<br/>achieve more<br/>compliance<br/>with MNH<br/>quality of care<br/>performance<br/>standards, the<br/>use of<br/>evidence-<br/>based delivery<br/>practices<br/>increased,<br/>leading to<br/>decreases in<br/>maternal and<br/>neonatal<br/>mortality.</p> |                                                                                                                                                   |
| <p>Singh et al<sup>65</sup><br/>(2017).<br/><br/>International</p> | <p>All geopolitical<br/>zones (NE, NW,<br/>NC, SS, SE,<br/>SW)<br/>urban and rural<br/>community and<br/>health facility</p> | <p>Observational<br/>(Retrospective<br/>cohort<br/>analysis):<br/>To assess the<br/>level of practice<br/>of SSC in<br/>Nigeria and<br/>determine<br/>whether it is<br/>associated with<br/>early initiation<br/>of breastfeeding<br/>i.e within the<br/>first hour of life</p> | <p>skin to skin<br/>contact</p>                                               | <p>Postnatal<br/>(newborn)<br/><br/>newborns</p>                             | <p>Only about 10% of<br/>mothers reported<br/>babies receiving<br/>(skin-skin contact)<br/>SSC. Newborns who<br/>were perceived to be<br/>large at birth were<br/>significantly more<br/>likely to experience<br/>SSC than smaller<br/>newborns.</p>                                                                                                                                                                          | <p>No: Coverage<br/>of SSC<br/>remained low<br/>despite known<br/>benefits for<br/>newborns<br/>without<br/>complications.</p>                                                                                                                                                                                          | <p>Facilitators:<br/>availability of skilled<br/>workers are health<br/>facilities, equitable<br/>diffusion of maternal<br/>health knowledge.</p> |



|                                                                                                                                                                                                                                                                                                                |                                                                    |                                                                                                                                                                                                                                                                                                                  |                                                                    |                                                                                                      |                                                                                                                                                                                                                                                                                                                                                                                                                                                                            |                                                                                                                                                                                                                                                                                                                                             |                                                                                                                                                                                                           |
|----------------------------------------------------------------------------------------------------------------------------------------------------------------------------------------------------------------------------------------------------------------------------------------------------------------|--------------------------------------------------------------------|------------------------------------------------------------------------------------------------------------------------------------------------------------------------------------------------------------------------------------------------------------------------------------------------------------------|--------------------------------------------------------------------|------------------------------------------------------------------------------------------------------|----------------------------------------------------------------------------------------------------------------------------------------------------------------------------------------------------------------------------------------------------------------------------------------------------------------------------------------------------------------------------------------------------------------------------------------------------------------------------|---------------------------------------------------------------------------------------------------------------------------------------------------------------------------------------------------------------------------------------------------------------------------------------------------------------------------------------------|-----------------------------------------------------------------------------------------------------------------------------------------------------------------------------------------------------------|
| <p>1<br/>2<br/>3<br/>4<br/>5<br/>6<br/>7<br/>8<br/>9<br/>10<br/>11<br/>12<br/>13</p> <p>Omole et al<sup>76</sup><br/>(2018)<br/><br/>International</p>                                                                                                                                                         | <p>Osun (SW)<br/>urban<br/>health facility</p>                     | <p>RCT:<br/>To determine<br/>the impact of an<br/>SMS based<br/>intervention on<br/>maternal health<br/>seeking<br/>behaviour.</p>                                                                                                                                                                               | <p>mhealth/SMS<br/>based health<br/>promotion<br/>intervention</p> | <p>Pregnancy<br/><br/>Pregnant<br/>women</p>                                                         | <p>An increase in<br/>facility-based delivery<br/>seen in the<br/>intervention group.<br/>Most participants in<br/>the intervention group<br/>expressed support for<br/>the use of text<br/>message for maternal<br/>health promotion</p>                                                                                                                                                                                                                                  | <p>Yes: Positive<br/>impact of SMS<br/>intervention on<br/>facility-based<br/>delivery.</p>                                                                                                                                                                                                                                                 | <p>Barriers: financial<br/>constraints, low level<br/>of literacy among<br/>recipients.</p>                                                                                                               |
| <p>14<br/>15<br/>16<br/>17<br/>18<br/>19<br/>20<br/>21<br/>22<br/>23<br/>24<br/>25<br/>26<br/>27<br/>28<br/>29<br/>30<br/>31<br/>32<br/>33<br/>34<br/>35<br/>36<br/>37<br/>38<br/>39<br/>40<br/>41<br/>42<br/>43<br/>44<br/>45<br/>46<br/>47</p> <p>Okereke et<br/>al<sup>87</sup> (2015)<br/><br/>Nigeria</p> | <p>Jigawa (NW)<br/>urban<br/>community and<br/>health facility</p> | <p>Post<br/>intervention<br/>assessment<br/>(qualitative):<br/>To assess the<br/>potential of<br/>clinical<br/>mentoring to<br/>improve<br/>maternal,<br/>newborn and<br/>child health<br/>service<br/>delivery, as well<br/>as the<br/>successes/challe<br/>nges associated<br/>with the<br/>implementation</p> | <p>Clinical mentoring<br/>for health workers</p>                   | <p>Across the<br/>continuum of<br/>care<br/><br/>health workers<br/>health service<br/>providers</p> | <p>Clinical mentoring<br/>improved service<br/>delivery within the<br/>health facilities.<br/>Significant<br/>improvements in the<br/>professional capacity<br/>of mentored health<br/>workers were<br/>observed. Best<br/>practices were<br/>introduced with the<br/>support of the clinical<br/>mentors such as the<br/>use of magnesium<br/>sulphate and<br/>misoprostol for the<br/>management of<br/>eclampsia and post-<br/>partum haemorrhage<br/>respectively.</p> | <p>Yes:<br/>Stakeholders<br/>report that the<br/>introduction of<br/>clinical<br/>mentoring into<br/>the Jigawa<br/>State health<br/>system gave<br/>rise to an<br/>improved<br/>capacity of the<br/>mentored<br/>health care<br/>workers to<br/>deliver better<br/>quality<br/>maternal,<br/>newborn and<br/>child health<br/>services</p> | <p>Barriers: Financial<br/>costs of recruiting<br/>clinical mentors,<br/>insufficient time for<br/>health providers.<br/><br/>Facilitators:<br/>promoting local<br/>ownership and<br/>sustainability.</p> |

|                                                     |                                                                         |                                                                                                                                                                    |                                                                                        |                                                                           |                                                                                                                                                                                                                                                                                                                                         |                                                                                                                                                                                                                  |                                                                                                                                                                               |
|-----------------------------------------------------|-------------------------------------------------------------------------|--------------------------------------------------------------------------------------------------------------------------------------------------------------------|----------------------------------------------------------------------------------------|---------------------------------------------------------------------------|-----------------------------------------------------------------------------------------------------------------------------------------------------------------------------------------------------------------------------------------------------------------------------------------------------------------------------------------|------------------------------------------------------------------------------------------------------------------------------------------------------------------------------------------------------------------|-------------------------------------------------------------------------------------------------------------------------------------------------------------------------------|
| Findley et al <sup>98</sup> (2015)<br>International | Katsina, Zamfara (NW) and Yobe (NE) rural community and health facility | Quasi-experimental design:<br>To evaluate an integrated maternal, newborn, and child health (MNCH) program to improve maternal health outcomes in Northern Nigeria | Integrated Maternal, Newborn and Child Health (IMNCH) program                          | Across the continuum of care<br><br>Women of childbearing age 15-49 years | There was significant improvement in nearly all maternal health indicators assessed. These include women with standing permission from their husband to go to the health centre; health care utilization; delivery with a skilled birth attendant, knowledge of maternal danger signs and having at least 1 antenatal care (ANC) visit. | Yes: The improvements between 2009 and 2013 demonstrate the measurable impact on maternal health outcomes of the program through local communities and primary health care services.                             | Facilitators: Integration of interventions, improved quality of services at facilities, community engagement.                                                                 |
| Leight et al <sup>99</sup> (2018)<br>International  | Jigawa (NW) rural health facility                                       | Cluster randomized control trial:<br>To examine the association between birth care receipt and use on maternal and neonatal health outcomes in Jigawa, Nigeria.    | Community Resource Person (CoRP) led distribution of safe birth kits to pregnant women | Pregnancy<br>Women of childbearing age 15-49 yrs                          | Only about half of women who received the birth kits, used the kits. There were no significant associations between birth kit use and facility-based delivery, completion of 4 or more ANC visits, skilled birth attendance and postnatal care. Women more likely to report prolonged labour and postpartum bleeding.                   | No: Introduction and the use of birth kits was not associated with reductions in maternal or neonatal morbidity, which may have been shaped by the mechanisms through which women accessed and utilise the kits. | Barriers: low level of penetration of birth kits, challenges with insecurity, low level of use of birth kits.<br><br>Facilitators: adequate education about the intervention. |

|                                                                 |                                              |                                                                                                                                                                                                   |                                                                                                                    |                                                                                                  |                                                                                                                                                                                                                                               |                                                                                                                                        |                                                                                                                                                                                |
|-----------------------------------------------------------------|----------------------------------------------|---------------------------------------------------------------------------------------------------------------------------------------------------------------------------------------------------|--------------------------------------------------------------------------------------------------------------------|--------------------------------------------------------------------------------------------------|-----------------------------------------------------------------------------------------------------------------------------------------------------------------------------------------------------------------------------------------------|----------------------------------------------------------------------------------------------------------------------------------------|--------------------------------------------------------------------------------------------------------------------------------------------------------------------------------|
| <p>Alexander et al<sup>22</sup> (2018)</p> <p>International</p> | <p>Oyo (SW) rural community</p>              | <p>RCT:<br/>To compare pregnancy outcomes in women exposed to household air pollution from wood and kerosene fuel stoves to women who received ethanol CleanCook stoves.</p>                      | <p>CleanCook ethanol Stoves [plus training on how to use the stove and prevent the dangers of smoke exposure].</p> | <p>Pregnancy<br/><br/>Pregnant women</p>                                                         | <p>Improved birth outcomes (mean birth weight, average gestational age at birth) were higher in ethanol stove users. Perinatal mortality (stillbirths and neonatal deaths) was twice as high in controls compared to ethanol stove users.</p> | <p>Yes:<br/>Transition from traditional biomass/ kerosene fuel to ethanol among pregnant women reduced adverse pregnancy outcomes.</p> | <p>Facilitators:<br/>Adequate education on the use of intervention.</p>                                                                                                        |
| <p>Abegunde et al<sup>23</sup> (2015)</p> <p>Nigeria</p>        | <p>Bauchi (NE) rural health facility</p>     | <p>Program evaluation (outcome):<br/>To estimate the impact of the MNCH/FP/RH interventions implemented in Bauchi State and to evaluate the progress towards the achievement of MDGs 4 and 5.</p> | <p>Integrated MNCH/FP/RH program</p>                                                                               | <p>Across the continuum of care<br/><br/>Women of childbearing age 15-49 years</p>               | <p>Maternal, newborn and child health indicators in the continuum of care neither reached the national average nor attained the 90% globally recommended coverage level.</p>                                                                  | <p>No: For several of the indicators, a modest improvement from baseline was found following the program.</p>                          | <p>Barriers: Inadequate financing, inadequate essential human resources for implementation.<br/><br/>Facilitators:<br/>Involvement of community members in implementation.</p> |
| <p>Cannon et al<sup>24</sup> (2017)</p> <p>International</p>    | <p>Sokoto (NW) urban and rural community</p> | <p>Post intervention assessment (qualitative):<br/>To assess the perceived successes and benefits of</p>                                                                                          | <p>Drugs/medication:<br/>Use of Misoprostol and Chlorhexidine gel</p>                                              | <p>Childbirth/Post natal newborn<br/><br/>Mothers and husbands health workers health service</p> | <p>Community-based distribution of Misoprostol and Chlorhexidine intervention was successful with overwhelming support for the use of</p>                                                                                                     | <p>Yes.</p>                                                                                                                            | <p>Barriers: Stocks outs, shortage of staff, socio-cultural barriers, myths and fears about the medication.</p>                                                                |

|                                                     |                                                              |                                                                                                                                                                  |                                                        |                                                                           |                                                                                                                                                                                                                                                                                                                                                                        |                                                                                                                                                                                                                                                                               |                                                                                                                       |
|-----------------------------------------------------|--------------------------------------------------------------|------------------------------------------------------------------------------------------------------------------------------------------------------------------|--------------------------------------------------------|---------------------------------------------------------------------------|------------------------------------------------------------------------------------------------------------------------------------------------------------------------------------------------------------------------------------------------------------------------------------------------------------------------------------------------------------------------|-------------------------------------------------------------------------------------------------------------------------------------------------------------------------------------------------------------------------------------------------------------------------------|-----------------------------------------------------------------------------------------------------------------------|
|                                                     |                                                              | using Misoprostol and Chlorhexidine as reported by different types of key stakeholders.                                                                          |                                                        | providers policy makers                                                   | the two drugs among users, their spouses and members of drug distribution system                                                                                                                                                                                                                                                                                       |                                                                                                                                                                                                                                                                               | Facilitators: Early advocacy with government and broader stakeholder engagement.                                      |
| Findley et al <sup>25</sup> (2013)<br>International | Katsina, Yobe, Zamfara (NE and NW) urban and rural community | Program evaluation (quasi-experimental design): Examine the extent to which the intervention program has facilitated improvements in key behaviours and outcomes | Integrated maternal, newborn, and child health program | Across the continuum of care<br><br>Women of childbearing age 15-49 years | Between baseline and follow-up, the rates of anti-tetanus vaccination and early breast feeding increased. Also, more newborns were checked by trained health workers. Women were performing more of the critical newborn care activities at follow-up, relied less on TBAs for health advice, and more on trained health workers. Infant and child mortality declined. | Yes: In the context of ongoing improvements to the primary health care system, the participatory and community-based interventions focusing on improved newborn and infant care were effective at changing infant care practices and outcomes in the intervention communities | Facilitators: Integrated approach of program, quality improvement at facilities, community participation and support. |

|                                                             |                                                        |                                                                                                                                                                                             |                                                                    |                                            |                                                                                                                                                                                                                                                                                                                                                              |                                                                                                                                                                                                                    |                                                                                                                            |
|-------------------------------------------------------------|--------------------------------------------------------|---------------------------------------------------------------------------------------------------------------------------------------------------------------------------------------------|--------------------------------------------------------------------|--------------------------------------------|--------------------------------------------------------------------------------------------------------------------------------------------------------------------------------------------------------------------------------------------------------------------------------------------------------------------------------------------------------------|--------------------------------------------------------------------------------------------------------------------------------------------------------------------------------------------------------------------|----------------------------------------------------------------------------------------------------------------------------|
| <p>Ishola et al<sup>26</sup> (2017)<br/>Nigeria</p>         | <p>Kano and Zamfara (NW) urban and rural community</p> | <p>Program evaluation (outcome): To characterize the effects of volunteer household counsellors (VHCs) upon improving knowledge of birth preparedness and complication readiness (BPCR)</p> | <p>ACCESS/Maternal and Child Health Integrated Program (MCHIP)</p> | <p>Pregnancy<br/>Pregnant women/mother</p> | <p>Mothers who received counselling had better knowledge of BPCR compared to women who did not. Mothers who received counselling had greater odds of recognising danger signs during delivery and post-partum.</p>                                                                                                                                           | <p>Yes: VHCs have substantially increased knowledge of BPCR and danger signs among women.</p>                                                                                                                      |                                                                                                                            |
| <p>Orobaton et al<sup>27</sup> (2016)<br/>International</p> | <p>Sokoto state (NW) rural community</p>               | <p>Program evaluation (process and outcome): To evaluate the community distributed SP program.</p>                                                                                          | <p>Community distribution of SP for Malaria-In-Pregnancy</p>       | <p>Pregnancy<br/>Pregnant women</p>        | <p>Up to 95% coverage of SP1 doses in the intervention LGAs compared to 26% in the counterfactual LGAs. The mean number of SP doses in the intervention LGAs was 2.1; 0.4 in the counterfactual. Measurable SP3+ coverage was 45% in the intervention and 0% in the counterfactual. Increased doses of IPTp-SP were associated with increases in newborn</p> | <p>Yes: The intervention is a feasible, safe, and affordable way to scale up the delivery of high impact IPTp-SP interventions in low resource malaria endemic settings, where few women access facility-based</p> | <p>Facilitators: Authentic community ownership, integrated approach of program, community involvement, peer influence.</p> |

1  
2  
3  
4  
5  
6  
7  
8  
9  
10  
11  
12  
13  
14  
15  
16  
17  
18  
19  
20  
21  
22  
23  
24  
25  
26  
27  
28  
29  
30  
31  
32  
33  
34  
35  
36  
37  
38  
39  
40  
41  
42  
43  
44  
45  
46  
47

|                                                |                                  |                                                                                                                                                                               |                                                                               |                                                                 |                                                                                                                                                                                                                                                                                                                                      |                                                                                                                                                                        |                                                                                                                   |
|------------------------------------------------|----------------------------------|-------------------------------------------------------------------------------------------------------------------------------------------------------------------------------|-------------------------------------------------------------------------------|-----------------------------------------------------------------|--------------------------------------------------------------------------------------------------------------------------------------------------------------------------------------------------------------------------------------------------------------------------------------------------------------------------------------|------------------------------------------------------------------------------------------------------------------------------------------------------------------------|-------------------------------------------------------------------------------------------------------------------|
|                                                |                                  |                                                                                                                                                                               |                                                                               |                                                                 | head circumference and lower odds of stillbirth.                                                                                                                                                                                                                                                                                     | maternal health services                                                                                                                                               |                                                                                                                   |
| Ezugwu et al <sup>28</sup> (2014)<br>Nigeria   | Enugu (SE) urban health facility | Post intervention assessment (retrospective review of program data): Evaluating the impact of the adoption of this evidence-based guidelines on maternal mortality reduction. | Promotion of Evidence based management of obstetric complications             | Pregnancy and childbirth<br><br>Pregnant women                  | There was a significant reduction in case fatality rate for both eclampsia (15.8% vs. 2.7%; P = 0.024, odds ratio = 5.84 ) and Postpartum haemorrhage (13.6% vs. 2.5% P value = 0.023, odds ratio = 5.5). There was 43.5% reduction in the MMR with the intervention (488 vs. 864/100 000 live births P = 0.039, odds ratio = 1.77). | Yes: Implementation of evidence-based guidelines/ intervention is possible in low resource settings and contributes to a significant reduction in the maternal deaths. |                                                                                                                   |
| Orobaton et al <sup>29</sup> (2015)<br>Nigeria | Sokoto (NW) rural community      | Post program evaluation (retrospective analysis of program data): To evaluate the impact of scaling up the use of                                                             | Drugs/medication: Chlorhexidine digluconate 7.1% gel plus misoprostol tablets | Childbirth and Postnatal (newborn).<br><br>Mothers and newborns | Of newborns that received the intervention (gel), 99.97% survived past 28 days.                                                                                                                                                                                                                                                      | Yes: Community led efforts to scale up the use of a single dose application of chlorhexidine digluconate                                                               | Barriers: Inadequate financing/heavy reliance on donor funding, problems with supply/availability of commodities. |

|                                            |                                                  |                                                                                                                                                                         |                                 |                                       |                                                                                                                                                                                                                                                                                                                                                                                                                                                                       |                                                                                                                                             |                                                                                                                               |
|--------------------------------------------|--------------------------------------------------|-------------------------------------------------------------------------------------------------------------------------------------------------------------------------|---------------------------------|---------------------------------------|-----------------------------------------------------------------------------------------------------------------------------------------------------------------------------------------------------------------------------------------------------------------------------------------------------------------------------------------------------------------------------------------------------------------------------------------------------------------------|---------------------------------------------------------------------------------------------------------------------------------------------|-------------------------------------------------------------------------------------------------------------------------------|
|                                            |                                                  | chlorhexidine digluconate 7.1% gel using a community-based distribution system                                                                                          |                                 |                                       |                                                                                                                                                                                                                                                                                                                                                                                                                                                                       | 7.1% gel and instructions on the hygienic care of the cord after application led to high rates of newborn survival.                         | Facilitators: Community ownership and active involvement of men, evidence-based advocacy to government and community leaders. |
| Disu et al <sup>30</sup> (2015)<br>Nigeria | All six geopolitical zones urban health facility | Post intervention assessment (cross sectional study): To evaluate the post-training neonatal resuscitation activities among doctors, nurses and midwives across Nigeria | Neonatal Resuscitation training | Postnatal (newborn)<br>Health workers | Over a five-year period (2008 to 2012), a total of 727 health workers were trained. At baseline, delivery attendance rates were 11 per doctor and 9 per nurse/midwife. These rates increased to 30 per doctor and 47 per nurse in 2012. Over 90% of doctors and nurses successfully used bag and mask to help babies breathe in the post-training period. Over the years, most of the doctors and nurses/midwives trained other birth attendants in these techniques. | Yes: Neonatal resuscitation training in Nigeria is well-subscribed, successful and the frequency and scope of step-down trainings are good. |                                                                                                                               |

1  
2  
3  
4  
5  
6  
7  
8  
9  
10  
11  
12  
13  
14  
15  
16  
17  
18  
19  
20  
21  
22  
23  
24  
25  
26  
27  
28  
29  
30  
31  
32  
33  
34  
35  
36  
37  
38  
39  
40  
41  
42  
43  
44  
45  
46  
47

|                                                               |                                                                  |                                                                                                                                                                                                                                                       |                                                                                                                                                                   |                                                                                                      |                                                                                                                                                                                                                                                                                                                                                           |                                                                                                                                                                                                                                       |                                                                                                                          |
|---------------------------------------------------------------|------------------------------------------------------------------|-------------------------------------------------------------------------------------------------------------------------------------------------------------------------------------------------------------------------------------------------------|-------------------------------------------------------------------------------------------------------------------------------------------------------------------|------------------------------------------------------------------------------------------------------|-----------------------------------------------------------------------------------------------------------------------------------------------------------------------------------------------------------------------------------------------------------------------------------------------------------------------------------------------------------|---------------------------------------------------------------------------------------------------------------------------------------------------------------------------------------------------------------------------------------|--------------------------------------------------------------------------------------------------------------------------|
| <p>Kwast<sup>31</sup><br/>(1996)</p> <p>International</p>     | <p>Oyo and Bauchi<br/>(SW, NE)<br/>urban<br/>health facility</p> | <p>Program<br/>evaluation<br/>(outcome):<br/>To describe<br/>selected<br/>MotherCare<br/>demonstration<br/>projects in the<br/>first 5 years<br/>between 1989<br/>and 1993 in<br/>Bolivia,<br/>Guatemala,<br/>Indonesia and<br/>Nigeria</p>           | <p>Safe MotherHood<br/>Project: Life<br/>saving skills<br/>training for<br/>midwives and<br/>interpersonal<br/>communication<br/>skills for all<br/>providers</p> | <p>Childbirth and<br/>Postnatal<br/>(mother and<br/>newborn).<br/><br/>Professional<br/>midwives</p> | <p>Significant reductions<br/>in postpartum<br/>haemorrhage and in<br/>prolonged labour; and<br/>a decline in<br/>intrapartum stillbirths,<br/>postpartum sepsis and<br/>broken-down<br/>episiotomies was<br/>observed. Midwives<br/>performed more than<br/>half of all vacuum<br/>extractions. Some<br/>reductions in maternal<br/>death were seen.</p> | <p>Yes: The<br/>upgrading of<br/>skills together<br/>with provision<br/>of<br/>supplies and a<br/>supportive<br/>management<br/>policy<br/>ultimately<br/>saved lives<br/>through an<br/>enhanced<br/>delivery<br/>environment.</p>   |                                                                                                                          |
| <p>Sam-Agudu<br/>et al<sup>33</sup> (2017)</p> <p>Nigeria</p> | <p>Nassarawa and<br/>FCT (NC)<br/>urban<br/>health facility</p>  | <p>Prospective<br/>matched cohort<br/>study:<br/>Investigate the<br/>impact of a<br/>structured peer<br/>support<br/>intervention on<br/>EID<br/>presentation and<br/>secondarily on<br/>HIV-free<br/>survival among<br/>HIV-exposed<br/>infants.</p> | <p>Mentor Mothers<br/>program</p>                                                                                                                                 | <p>Postnatal<br/>(newborn)<br/><br/>Mothers and<br/>newborns</p>                                     | <p>Exposure to MM<br/>support was<br/>associated with higher<br/>odds of timely EID<br/>presentation among<br/>infants, compared<br/>with routine PS<br/>(adjusted odds ratios<br/>= 3.7, 95%<br/>confidence interval:<br/>2.8 to 5.0).</p>                                                                                                               | <p>Yes: Closely<br/>supervised,<br/>organized MM<br/>support<br/>significantly<br/>improved<br/>presentation<br/>for EID among<br/>HIV-exposed<br/>infants and<br/>uptake of EID<br/>testing in a<br/>rural Nigerian<br/>setting.</p> | <p>Facilitators:<br/>supportive<br/>supervision and<br/>quality of interactions<br/>between clients and<br/>mentors.</p> |



1  
2  
3  
4  
5  
6  
7  
8  
9  
10  
11  
12  
13  
14  
15  
16  
17  
18  
19  
20  
21  
22  
23  
24  
25  
26  
27  
28  
29  
30  
31  
32  
33  
34  
35  
36  
37  
38  
39  
40  
41  
42  
43  
44  
45  
46  
47

|                                                                   |                                    |                                                                                                                                                                                               |                                                                                  |                                                                  |                                                                                                                                                                                                                                                                                                                                                                                          |                                                                                                                                                                                                 |                                                                                                                                                      |
|-------------------------------------------------------------------|------------------------------------|-----------------------------------------------------------------------------------------------------------------------------------------------------------------------------------------------|----------------------------------------------------------------------------------|------------------------------------------------------------------|------------------------------------------------------------------------------------------------------------------------------------------------------------------------------------------------------------------------------------------------------------------------------------------------------------------------------------------------------------------------------------------|-------------------------------------------------------------------------------------------------------------------------------------------------------------------------------------------------|------------------------------------------------------------------------------------------------------------------------------------------------------|
| <p>Qureshi et al<sup>34</sup> (2011).<br/><br/>International</p>  | <p>Sokoto (NW) rural community</p> | <p>Randomised community trial:<br/>To assess the impact of community volunteers to promote exclusive breastfeeding.</p>                                                                       | <p>Counselling on EBF by community volunteers</p>                                | <p>Postnatal (mothers and newborn).<br/><br/>Nursing mothers</p> | <p>After counselling, the proportion of mothers with intention to EBF (a knowledge score &gt;50%) increased significantly and women who were exclusively breastfeeding increased. This increase was associated with maternal age, maternal education and women who were already exclusively breastfeeding. A significant proportion of women agreed EBF was beneficial to the child.</p> | <p>Yes: Counselling served as a useful strategy for promoting the duration of EBF for six months and for developing support systems for nursing mothers.</p>                                    |                                                                                                                                                      |
| <p>Davies-Adetugbo et al<sup>35</sup> (1997)<br/><br/>Nigeria</p> | <p>Osun (SW) rural community</p>   | <p>Pre/post intervention assessment:<br/>To evaluate the impact of training community extension health workers on breastfeeding knowledge and practice among mothers in rural communities</p> | <p>Training of community extension health workers on promoting breastfeeding</p> | <p>Postnatal (mothers and newborn)<br/><br/>Pregnant women</p>   | <p>Significant increase in early initiation of breastfeeding by mothers who delivered at perinatal facilities staffed by ISBFP-trained PHC workers. 32% of the deliveries in intervention area reported early initiation of breastfeeding (within 30min of delivery) compared with only 6% in the</p>                                                                                    | <p>Yes: The results suggest that the training enhanced the health workers' knowledge about EBF and attitudes towards breastfeeding, and that these workers have had a positive impact on at</p> | <p>Barriers: Negative attitudes towards EBF.<br/><br/>Facilitators: Community participation and linkages, trainings conducted in local language.</p> |

|                                                     |                                                            |                                                                                                                                                                           |                                                                     |                             |                                                                                                                                                                                                                                      |                                                                                                                                 |                                                                                                                                                                       |
|-----------------------------------------------------|------------------------------------------------------------|---------------------------------------------------------------------------------------------------------------------------------------------------------------------------|---------------------------------------------------------------------|-----------------------------|--------------------------------------------------------------------------------------------------------------------------------------------------------------------------------------------------------------------------------------|---------------------------------------------------------------------------------------------------------------------------------|-----------------------------------------------------------------------------------------------------------------------------------------------------------------------|
|                                                     |                                                            |                                                                                                                                                                           |                                                                     |                             | control area. In all instances, trained PHC workers had better knowledge of and attitudes towards breastfeeding and made the correct recommendations on all aspects of breastfeeding than untrained controls.                        | least one aspect of breastfeeding behaviour in the community: mothers' timely initiation of breastfeeding.                      |                                                                                                                                                                       |
| Ojofeitimi et al <sup>36</sup> (1982)<br>Nigeria    | Oyo (SW) urban health facility                             | Pre/post intervention assessment: To investigate the effect of regular nutritional counselling and fear mechanism techniques to motivate pregnant women to consume foods. | Nutritional counselling using fear-based mechanism/ techniques      | Pregnancy<br>Pregnant women | The experimental group had a significant pattern of monthly weight gain ( $P < 0.02$ ) and heavier babies ( $P < 0.01$ ) than the control group.                                                                                     | Yes: Nutritional counselling served to correct erroneous assumptions and aversions about food.                                  |                                                                                                                                                                       |
| Danmusa et al <sup>37</sup> (2014)<br>International | All six geopolitical zones urban and rural health facility | Program evaluation (process): To describe the findings of program evaluation, including the challenges encountered while                                                  | Magnesium sulphate for the treatment of pre-eclampsia and eclampsia | Pregnancy<br>Pregnant women | A significant drop in the case fatality rate due to eclampsia from 20.9% before the start of services to 2.3% after was observed in the lead state, Kano. A significant case fatality drop (from 15.1% to 2.7%) across the six state | Yes: Reductions in deaths due to eclampsia, and states have collectively made significant progress towards the full integration | Barriers: High frequency of home births, resistance to change from health providers, inadequate number of trained staff for implementation, poor quality of services. |

1  
2  
3  
4  
5  
6  
7  
8  
9  
10  
11  
12  
13  
14  
15  
16  
17  
18  
19  
20  
21  
22  
23  
24  
25  
26  
27  
28  
29  
30  
31  
32  
33  
34  
35  
36  
37  
38  
39  
40  
41  
42  
43  
44  
45  
46  
47

|                                                                                  |                                                                          |                                                                                                                                                                                                  |                                                                                                               |                                                                           |                                                                                               |                                                                                                                                                                                                                               |                                                                                                                          |
|----------------------------------------------------------------------------------|--------------------------------------------------------------------------|--------------------------------------------------------------------------------------------------------------------------------------------------------------------------------------------------|---------------------------------------------------------------------------------------------------------------|---------------------------------------------------------------------------|-----------------------------------------------------------------------------------------------|-------------------------------------------------------------------------------------------------------------------------------------------------------------------------------------------------------------------------------|--------------------------------------------------------------------------------------------------------------------------|
|                                                                                  |                                                                          | implementing the projects, the successes achieved, and existing opportunities for future scaling up of the services across the country.                                                          |                                                                                                               |                                                                           | hospitals lends local legitimacy to the use of the drug to treat pre-eclampsia and eclampsia. | of the use of magnesium sulfate into the Nigerian healthcare system.                                                                                                                                                          | Facilitators: Advocacy to stakeholders, community involvement, supportive national health policies, enhanced monitoring. |
| Maternal, Newborn and Child Health Programme <sup>38</sup> (2017)<br><br>Nigeria | Jigawa, Kaduna, Kano, Katsina, Yobe, Zamfara (NW and NE) rural community | Program process and outcome evaluation: Evaluation of a program to increase access and uptake to Reproductive, Maternal, Newborn and Child Health (RMNCH) services for hard-to-reach communities | Integrated MNCH outreach services: increasing demand and access to MNCH services in hard-to-reach communities | Across the continuum of care.<br><br>Women and young married adolescents. | 271 hard-to-reach communities accessed with integrated RMNCH outreach services.               | Yes: Prior to intervention, the outreach teams were not meeting the full needs for maternal and child health in communities. The program has ensured a continuum of care for MNCH services, even in the most rural locations. | Facilitators: Community engagement, community needs assessment, support from states and national governments.            |

|                                                                                                                                                    |                                                                         |                                                |                                                                                                                                                                |                                                                         |                                      |                                                                                                                                                                                                                                                                                                                                                                           |                                                                                                                                                                                                           |                                                                                                                       |
|----------------------------------------------------------------------------------------------------------------------------------------------------|-------------------------------------------------------------------------|------------------------------------------------|----------------------------------------------------------------------------------------------------------------------------------------------------------------|-------------------------------------------------------------------------|--------------------------------------|---------------------------------------------------------------------------------------------------------------------------------------------------------------------------------------------------------------------------------------------------------------------------------------------------------------------------------------------------------------------------|-----------------------------------------------------------------------------------------------------------------------------------------------------------------------------------------------------------|-----------------------------------------------------------------------------------------------------------------------|
| 1<br>2<br>3<br>4<br>5<br>6<br>7<br>8<br>9<br>10<br>11<br>12<br>13<br>14<br>15<br>16<br>17<br>18<br>19<br>20<br>21<br>22                            | Maternal and Child Survival Program <sup>39</sup> (2018)<br><br>Nigeria | Kogi, Ebonyi (NC and SE) rural health facility | Post program outcome evaluation: To reduce newborn mortality through the implementation of key newborn interventions.                                          | Provision of key newborn interventions: neonatal resuscitation, KMC etc | Postnatal (newborn) newborns         | ENC defined as provision of skin-to-skin contact after birth, clean cord care with or without CHX, and early initiation of breastfeeding -within 30 minutes of birth increased from about 26% to 92%. Over 90% of asphyxiated babies in intervention states received successful neonatal resuscitation. Uptake and use of CHX increased from 0% at baseline to about 92%. | Yes: MCSP's newborn health strategies have promoted the scale up of high impact interventions that address the three major causes of newborn morbidity and mortality in Nigeria.                          | Facilitators: Incorporation into local authority's strategy health plan, demand creation activities, staff retention. |
| 23<br>24<br>25<br>26<br>27<br>28<br>29<br>30<br>31<br>32<br>33<br>34<br>35<br>36<br>37<br>38<br>39<br>40<br>41<br>42<br>43<br>44<br>45<br>46<br>47 | Maternal and Child Survival Program <sup>40</sup> (2018)<br><br>Nigeria | Kogi, (NC and SE) rural health facility        | Post program outcome evaluation: To increase voluntary family planning uptake among postpartum women delivering in health facilities in Kogi and Ebonyi states | Integrated Post-Partum Family Planning Intervention                     | Postnatal (mothers) Postpartum women | PPFP services were initiated in 233 health facilities, with 637 health care workers empowered to provide PPFP services. This increased the pool of competent service providers for both post-partum FP and long-acting reversible contraceptives (LARC). There was improved strategic planning for family planning in both states.                                        | Yes: Trends show contraceptive access for voluntary post-partum family planning has increased in both states, despite initial low contraceptive use prevalence with an estimated 25k pregnancies averted. | Facilitators: Availability of competent health providers, effective provision of health information to women.         |

|                                                                                                    |                                                                                  |                                                                             |                                                                                                                                                                                                      |                                                        |                                                                                             |                                                                                                                                                             |                                                                                                                       |                                                                                                                                       |
|----------------------------------------------------------------------------------------------------|----------------------------------------------------------------------------------|-----------------------------------------------------------------------------|------------------------------------------------------------------------------------------------------------------------------------------------------------------------------------------------------|--------------------------------------------------------|---------------------------------------------------------------------------------------------|-------------------------------------------------------------------------------------------------------------------------------------------------------------|-----------------------------------------------------------------------------------------------------------------------|---------------------------------------------------------------------------------------------------------------------------------------|
| 1<br>2<br>3<br>4<br>5<br>6<br>7<br>8<br>9<br>10<br>11<br>12<br>13                                  | Maternal, Newborn and Child Health Programme <sup>41</sup> (2017)<br><br>Nigeria | Jigawa, Kano, Kaduna, Katsina, Yobe, Zamfara (NW, NE) rural community       | Program outcome evaluation: To improve health message delivery to men and encourage their active role in women and child health.                                                                     | Male Support Groups                                    | Across the continuum of care<br><br>Males in intervention states.                           | Over 1500 support groups established and supported. Over 4,000 interpersonal communication sessions held.                                                   | Yes.                                                                                                                  | Facilitators: Active community/stakeholder engagement, community ownership.                                                           |
| 14<br>15<br>16<br>17<br>18<br>19<br>20<br>21<br>22<br>23<br>24<br>25<br>26<br>27<br>28<br>29<br>30 | Maternal, Newborn and Child Health Programme <sup>42</sup> (2016)<br><br>Nigeria | Jigawa, Kano, Kaduna, Katsina, Yobe, Zamfara (NW, NE) rural health facility | Program outcome evaluation: To assess outcome of an intervention increasing the uptake of long-acting reversible contraception services in primary Health centres through Competency-based Training. | Integrated Competency Based Training for healthworkers | Pre-pregnancy<br><br>Women of childbearing age                                              | 851 health care providers have been trained in the integrated package of reproductive, maternal, newborn and child health (RMNCH), including LARC services. | Yes.                                                                                                                  | Facilitators: Demand creation activities, good commodity supply chain.                                                                |
| 31<br>32<br>33<br>34<br>35<br>36<br>37<br>38<br>39<br>40<br>41<br>42<br>43<br>44<br>45<br>46<br>47 | Mckaig et al <sup>44</sup> (2009)<br><br>International                           | Kano (NW) urban and rural community and health facility                     | Program outcome evaluation (qualitative study): To examine integrated MNCH/FP services as a means towards                                                                                            | Scale-up of postpartum family planning                 | Across the continuum of care<br><br>policymakers, health care providers, community members. | Significant increases in number of FP clients and method use per site following the implementation of the program.                                          | Yes: The approach systematically increases MNCH/FP integration and had a positive effect on service use, particularly | Barriers: Negative religious/community attitudes towards MNCH services.<br><br>Facilitators: Service integration, community linkages. |

|                                                  |                                                           |                                                                                                                                                                             |                                                                                                          |                                                                             |                                                                                                                                                                                                                               |                                                                                                                                                                       |  |
|--------------------------------------------------|-----------------------------------------------------------|-----------------------------------------------------------------------------------------------------------------------------------------------------------------------------|----------------------------------------------------------------------------------------------------------|-----------------------------------------------------------------------------|-------------------------------------------------------------------------------------------------------------------------------------------------------------------------------------------------------------------------------|-----------------------------------------------------------------------------------------------------------------------------------------------------------------------|--|
|                                                  |                                                           | meeting the family planning and reproductive health needs of women in the postpartum period.                                                                                |                                                                                                          |                                                                             |                                                                                                                                                                                                                               | FP, even in a very conservative environment.                                                                                                                          |  |
| Kana et al <sup>45</sup> (2015)<br>Nigeria       | countrywide urban and rural health facility and community | Systematic review:<br>To describe and indirectly measure the effect of the Maternal, Newborn and Child Health (MNCH) interventions implemented in Nigeria from 1990 to 2014 | Interventions for maternal and child health                                                              | Across the continuum of care<br><br>mothers, newborns, under-five children. | The national MMR shows a consistent reduction (Annual Percentage Change (APC) = -3.10%, 95% CI: -5.20 to -1.00 %) with marked decrease in the slope observed in the period with a cluster of published studies (2004–2014).   | Yes: The development of MNCH policies, implementation and publication of interventions corresponds with the downward trend of maternal and child mortality in Nigeria |  |
| Abdul-Hadi et al <sup>46</sup> (2013)<br>Nigeria | Gombe (NE) rural community                                | Intervention assessment (quasi-experimental design):<br>To demonstrate effectiveness of Community Based Distribution of Injectable Contraceptives Using                     | Community based distribution (CBD) of injectable contraceptives using community health extension workers | Pre-pregnancy                                                               | The CBD mean couple years of protection (CYP) for injectables-depomedroxy-progesterone acetate (DMPA) and norethisterone enantate was higher (27.72 & 18.16 respectively) than the facility CYP (7.21 & 5.08 respectively) (p | Yes: Community based distribution of contraceptives was successful.                                                                                                   |  |

|                                                         |                                                                           |                                                                                                                                                                                                                                                                                             |                                                                |                                                            |                                                                                                                                                                                                                                                                                                                                                                           |                                                                                                                                                                                                    |                                     |
|---------------------------------------------------------|---------------------------------------------------------------------------|---------------------------------------------------------------------------------------------------------------------------------------------------------------------------------------------------------------------------------------------------------------------------------------------|----------------------------------------------------------------|------------------------------------------------------------|---------------------------------------------------------------------------------------------------------------------------------------------------------------------------------------------------------------------------------------------------------------------------------------------------------------------------------------------------------------------------|----------------------------------------------------------------------------------------------------------------------------------------------------------------------------------------------------|-------------------------------------|
|                                                         |                                                                           | Community Health Extension Workers.                                                                                                                                                                                                                                                         |                                                                |                                                            | < 0.05) with no injection related complications. The CBD's mean CYP for all methods was also found to be four times higher (11.65) than that generated in health facilities (2.86) (p < 0.05)                                                                                                                                                                             |                                                                                                                                                                                                    |                                     |
| Speizer et al <sup>47</sup> (2014)<br><br>International | Kaduna, Abuja-FCT, Kwara, Oyo and Edo (NC, NW, SS and SW) urban community | Longitudinal evaluation of program/intervention: To examine the role of demand generation activities undertaken as part of the Urban RH Initiative programs-seeking to increase modern contraceptive use by 20 percentage points in targeted urban areas, particularly among the urban poor | Family planning demand creation and supply side interventions. | Pre-pregnancy<br><br>Women of childbearing age 15-49 years | Outreach by community health or family planning workers as well as local radio programs was significantly associated with increased use of modern contraceptive methods. Television programs had a significant effect on modern contraceptive use. Program slogans and materials distributed across the cities were also significantly associated with modern method use. | Yes: Multi-level targeted demand generation activities contributed to increasing modern contraceptive use in urban areas, leading to improved access to maternal and reproductive health services. | Facilitators: community engagement. |

1  
2  
3  
4  
5  
6  
7  
8  
9  
10  
11  
12  
13  
14  
15  
16  
17  
18  
19  
20  
21  
22  
23  
24  
25  
26  
27  
28  
29  
30  
31  
32  
33  
34  
35  
36  
37  
38  
39  
40  
41  
42  
43  
44  
45  
46  
47

|                                                                 |                                                                           |                                                                                                                                                                                                                                                             |                                                                                                                        |                                                                   |                                                                                                                                                                                                                                                                                                                                                                                                                                          |                                                                                                                                                                       |                                                                                                                                                                                                                                 |
|-----------------------------------------------------------------|---------------------------------------------------------------------------|-------------------------------------------------------------------------------------------------------------------------------------------------------------------------------------------------------------------------------------------------------------|------------------------------------------------------------------------------------------------------------------------|-------------------------------------------------------------------|------------------------------------------------------------------------------------------------------------------------------------------------------------------------------------------------------------------------------------------------------------------------------------------------------------------------------------------------------------------------------------------------------------------------------------------|-----------------------------------------------------------------------------------------------------------------------------------------------------------------------|---------------------------------------------------------------------------------------------------------------------------------------------------------------------------------------------------------------------------------|
| <p>Hotchkiss et al<sup>48</sup> (2011)</p> <p>International</p> | <p>Countrywide urban and rural health facility</p>                        | <p>Post program evaluation-cross sectional study: To investigate whether the expansion of the role of private providers in the provision of modern contraceptive supplies is associated with increased horizontal inequity in modern contraceptive use.</p> | <p>Expansion of the private commercial sector in the provision of contraceptive supplies</p>                           | <p>Pre-pregnancy</p> <p>Women of childbearing age 15-49 years</p> | <p>Proportion of women who report obtaining the contraceptive supplies from the commercial private sector increased by 69 percent over the 1999 to 2008 period. In Nigeria, the private commercial sector became the most important source of contraceptive supplies to women in poorest wealth quintile group. In addition, women in better off wealth quintiles also became increasingly reliant on the private commercial sector.</p> | <p>Yes: The expansion of the private commercial sector supply of contraceptives decreased inequities in the use of modern contraceptives in Nigeria.</p>              | <p>Facilitators: social marketing of intervention to create demand.</p>                                                                                                                                                         |
| <p>Fayemi et al<sup>49</sup> (2011)</p> <p>Nigeria</p>          | <p>Bauchi, Gombe, Plateau, Edo, Ogun (NC, NE, SS, SW) rural community</p> | <p>Longitudinal evaluation of program/intervention: To improve maternal mortality reduction through increasing contraceptive uptake in 10 rural local government areas (LGAs)in</p>                                                                         | <p>Community Based Delivery (CBD) of non-prescriptive family planning services and the treatment of minor ailments</p> | <p>Pregnancy</p> <p>Women of childbearing age 15-49 years</p>     | <p>Increase in the proportion of community members who had utilised FP commodities at all, from 28% at baseline to 49%, and an increase in the proportion of current contraceptive users from 16% at baseline to 37%. An increase in knowledge of common family planning methods,</p>                                                                                                                                                    | <p>Yes: A community-based distribution approach played a critical role in enhancing access to Reproductive Health and Family Planning information and services in</p> | <p>Barriers: Inadequate financial support for program, poor support from spouses of participating women, misconceptions of community members about family planning.</p> <p>Facilitators: Advocacy and community engagement,</p> |



1  
2  
3  
4  
5  
6  
7  
8  
9  
10  
11  
12  
13  
14  
15  
16  
17  
18  
19  
20  
21  
22  
23  
24  
25  
26  
27  
28  
29  
30  
31  
32  
33  
34  
35  
36  
37  
38  
39  
40  
41  
42  
43  
44  
45  
46  
47

|                                               |                                                                                                              |                                                                                                                                                                                                                                          |                                                                               |                                                        |                                                                                                                                                                                                                                                                                                                                                                                                                                                                                                   |                                                                                                                                                        |                                                                                                                   |
|-----------------------------------------------|--------------------------------------------------------------------------------------------------------------|------------------------------------------------------------------------------------------------------------------------------------------------------------------------------------------------------------------------------------------|-------------------------------------------------------------------------------|--------------------------------------------------------|---------------------------------------------------------------------------------------------------------------------------------------------------------------------------------------------------------------------------------------------------------------------------------------------------------------------------------------------------------------------------------------------------------------------------------------------------------------------------------------------------|--------------------------------------------------------------------------------------------------------------------------------------------------------|-------------------------------------------------------------------------------------------------------------------|
|                                               |                                                                                                              | five Nigerian states.                                                                                                                                                                                                                    |                                                                               |                                                        | including male and female condoms, injectables and pills.                                                                                                                                                                                                                                                                                                                                                                                                                                         | the project communities.                                                                                                                               | involvement of males in implementation, demand creation activities, regular monitoring and evaluation.            |
| Ogu et al <sup>50</sup> (2012)<br><br>Nigeria | Kaduna, Kano, Adamawa, Bauchi, Borno, Taraba, and Katsina, Niger (NC, NE,NW) rural and urban health facility | Pre/Post-intervention (quasi-experimental): To investigate the effectiveness of an intervention designed to improve the capacity of private medical doctors to offer quality abortion and postabortion care to women in northern Nigeria | Capacity-building workshops for health workers to improve post-abortion care. | Pregnancy<br><br>Women of childbearing age 15-49 years | 458 trained private medical doctors and 839 nurses and midwives across 430 private clinics treated a total of 17,009 women over the 10 years of the project (about 2,100 women annually). Not a single case of abortion-related maternal mortality was recorded, with only 33 women experiencing mild complications, while none suffered major complications of abortion care. At the same time, there was a reduction in treatment cost and a doubling of the contraceptive uptake by the women. | Yes: Building the capacity of private medical providers reduced maternal morbidity and mortality associated with induced abortion in northern Nigeria. | Facilitators: detailed community needs assessment, community engagement, culturally appropriate health education. |

|                                                              |                                                           |                                                                                                                                                                                                       |                                                                                                  |                                                               |                                                                                                                                                                                                                                                                                                                     |                                                                                                                                                                                                                     |  |
|--------------------------------------------------------------|-----------------------------------------------------------|-------------------------------------------------------------------------------------------------------------------------------------------------------------------------------------------------------|--------------------------------------------------------------------------------------------------|---------------------------------------------------------------|---------------------------------------------------------------------------------------------------------------------------------------------------------------------------------------------------------------------------------------------------------------------------------------------------------------------|---------------------------------------------------------------------------------------------------------------------------------------------------------------------------------------------------------------------|--|
| <p>Mens et al<sup>51</sup> (2011)</p> <p>International</p>   | <p>Edo (SS) rural community</p>                           | <p>Pre/Post-intervention evaluation: Explore peer to peer education as a tool in raising knowledge of MIP among women of childbearing age and preventive practices.</p>                               | <p>Peer led health education campaign to address malaria in pregnancy.</p>                       | <p>Pregnancy</p> <p>Women of childbearing age 15-49 years</p> | <p>The peer education campaign had a significant impact in raising the level of knowledge among the women.</p>                                                                                                                                                                                                      | <p>Yes: The knowledge of women of childbearing age on malaria in pregnancy and its preventive measures increased.</p>                                                                                               |  |
| <p>McNabb et al<sup>52</sup> (2015)</p> <p>International</p> | <p>Abuja-FCT and Nassarawa (NC) urban health facility</p> | <p>Pre/post intervention assessment: To determine if introducing the mobile app: 1) improved the quality of ANC services provided, and 2) improved client satisfaction with ANC services provided</p> | <p>An m-health technology intervention for CHEWs/HCWs to provide higher-quality ANC services</p> | <p>Pregnancy</p> <p>Pregnant women</p>                        | <p>Overall, the intervention was associated with higher quality of ANC scores, with these improvements observed in multiple domains of care, including health counselling, technical services provided, and quality of health education. A significant improvement in overall client satisfaction was observed.</p> | <p>Yes: Introduction of a low-cost mobile case management and decision support application led to behaviour changes and improved the quality of services provided by a lower-level cadre of healthcare workers.</p> |  |

1  
2  
3  
4  
5  
6  
7  
8  
9  
10  
11  
12  
13  
14  
15  
16  
17  
18  
19  
20  
21  
22  
23  
24  
25  
26  
27  
28  
29  
30  
31  
32  
33  
34  
35  
36  
37  
38  
39  
40  
41  
42  
43  
44  
45  
46  
47

|                                                         |                                 |                                                                                                                                                                                                                                                   |                                                                                                                                                                                   |                                                                                                        |                                                                                                                                                                                                                   |                                                                                                                                                                                                                                                                                                                                           |  |
|---------------------------------------------------------|---------------------------------|---------------------------------------------------------------------------------------------------------------------------------------------------------------------------------------------------------------------------------------------------|-----------------------------------------------------------------------------------------------------------------------------------------------------------------------------------|--------------------------------------------------------------------------------------------------------|-------------------------------------------------------------------------------------------------------------------------------------------------------------------------------------------------------------------|-------------------------------------------------------------------------------------------------------------------------------------------------------------------------------------------------------------------------------------------------------------------------------------------------------------------------------------------|--|
| <p>Anyaehe et al<sup>53</sup> (2011)</p> <p>Nigeria</p> | <p>Imo (SE) rural community</p> | <p>Longitudinal evaluation of program/intervention:<br/>To assess the impact of free distribution of ITN to pregnant and nursing mothers in a rural community in Nigeria, using asymptomatic malaria parasitaemia as the main outcome measure</p> | <p>Roll Back Malaria Campaign:<br/>increased availability of ITNs for free distribution to pregnant women and children under at antenatal, postnatal and immunization clinics</p> | <p>Pregnancy and postnatal (mother and newborn)</p> <p>pregnant women/nursing mothers and newborns</p> | <p>There was a sustained but insignificant rise in asymptomatic malaria parasitaemia post-distribution of ITNs. Out of the 990 subjects recruited, 470 tested positive with asymptomatic malaria parasitemia.</p> | <p>No: Although ITN has a capacity to reduce mosquito bites and malaria prevalence, our study showed a non-significant increase in prevalence of malaria after 6 months use in a rural agrarian Nigerian community. This suggests ITN intervention must be complemented with awareness campaigns and other vector control strategies.</p> |  |
|---------------------------------------------------------|---------------------------------|---------------------------------------------------------------------------------------------------------------------------------------------------------------------------------------------------------------------------------------------------|-----------------------------------------------------------------------------------------------------------------------------------------------------------------------------------|--------------------------------------------------------------------------------------------------------|-------------------------------------------------------------------------------------------------------------------------------------------------------------------------------------------------------------------|-------------------------------------------------------------------------------------------------------------------------------------------------------------------------------------------------------------------------------------------------------------------------------------------------------------------------------------------|--|

|                                                                                                                                                 |                                                     |                                                     |                                                                                                                                                                                                                                                                                           |                                                                                       |                                                        |                                                                                                                                                                                                                                                       |                                                                                                                                                                          |                                                                                                                                                             |
|-------------------------------------------------------------------------------------------------------------------------------------------------|-----------------------------------------------------|-----------------------------------------------------|-------------------------------------------------------------------------------------------------------------------------------------------------------------------------------------------------------------------------------------------------------------------------------------------|---------------------------------------------------------------------------------------|--------------------------------------------------------|-------------------------------------------------------------------------------------------------------------------------------------------------------------------------------------------------------------------------------------------------------|--------------------------------------------------------------------------------------------------------------------------------------------------------------------------|-------------------------------------------------------------------------------------------------------------------------------------------------------------|
| 1<br>2<br>3<br>4<br>5<br>6<br>7<br>8<br>9<br>10<br>11<br>12<br>13<br>14<br>15<br>16<br>17<br>18<br>19<br>20<br>21<br>22<br>23<br>24<br>25<br>26 | Chabikuli et al <sup>55</sup> (2009)<br><br>Nigeria | 71 health facilities across Nigeria urban and rural | Pre/post evaluation of program:<br>To measure changes in service utilization of a model integrating family planning with HIV counselling and testing (HCT), antiretroviral therapy (ART) and prevention of mother-to-child transmission (PMTCT) in the Nigerian public health facilities. | a referral-based, co-located family planning–HIV integration model                    | Pregnancy<br><br>Women of childbearing age 15-49 years | Attendance at family planning clinics and mean couple year of protection increased significantly following integration of services.<br>Attendance by men at family planning clinics was significantly higher among clients referred from HIV clinics. | Yes: Family planning–HIV integration using the referral model improved family planning service utilization by clients accessing HIV services due to increased referrals. | Barriers: Low utilisation of intervention due to user fees, long waiting times.<br><br>Facilitators: decentralisation of services, integration of programs. |
| 27<br>28<br>29<br>30<br>31<br>32<br>33<br>34<br>35<br>36<br>37<br>38<br>39<br>40<br>41<br>42<br>43<br>44<br>45<br>46<br>47                      | Kalu et al <sup>56</sup> (2012)<br><br>Nigeria      | Ebonyi (SE) urban health facility                   | Post-intervention evaluation:<br>To review the implementation of Post Abortion Care and effective linkage to other post abortion services in Ebonyi State University Teaching                                                                                                             | Provision of post-abortion care and effective linkage to other post abortion services | Pregnancy<br><br>Health service providers              | About a third of the PAC care providers had formal training for the implementation of the PAC services. The commonest intervention offered the patients was Manual Vacuum Aspiration (MVA). Only 15% of the caregivers were satisfied with the        | No: There is poor integration between emergency post abortion care and other reproductive health services in the centre, resulting in high rates of maternal mortality   |                                                                                                                                                             |

|                                                       |                                |                                                                                                                                                                                                         |                                                                                            |                             |                                                                                                                                                                                                                                                                        |                                                                                                                                                                    |                                                                                                                                   |
|-------------------------------------------------------|--------------------------------|---------------------------------------------------------------------------------------------------------------------------------------------------------------------------------------------------------|--------------------------------------------------------------------------------------------|-----------------------------|------------------------------------------------------------------------------------------------------------------------------------------------------------------------------------------------------------------------------------------------------------------------|--------------------------------------------------------------------------------------------------------------------------------------------------------------------|-----------------------------------------------------------------------------------------------------------------------------------|
|                                                       |                                | Hospital, Abakaliki, Nigeria                                                                                                                                                                            |                                                                                            |                             | linkage between PAC and the Family Planning services.                                                                                                                                                                                                                  | related to abortion complications.                                                                                                                                 |                                                                                                                                   |
| Joseph et al <sup>57</sup> (2011)<br>International    | Edo (SS) urban health facility | Cohort study: To assess adverse pregnancy outcomes in HIV infected women who received highly active antiretroviral therapy (HAART) from early pregnancy compared with untreated-maternal HIV infection. | Administration of highly active antiretroviral therapy (HAART) from early pregnancy        | Pregnancy<br>Pregnant women | Intrauterine growth restriction (IUGR), pre-term birth and caesarean delivery were significantly higher among women with untreated-HIV infection in pregnancy compared with women who received HAART from early pregnancy.                                             | Yes: Provision of HAART significantly reduces adverse pregnancy outcomes.                                                                                          |                                                                                                                                   |
| Okeibunor et al <sup>97</sup> (2011)<br>International | Akwa Ibom (SS) rural community | Before and After analysis (quasi-experimental design): To determine the degree to which community-directed interventions can improve access to malaria                                                  | A community directed intervention (CDI) to improve effective access to malaria prevention. | Pregnancy<br>Pregnant women | More women slept under an ITN during pregnancy in the treatment areas. The effects of the CDI programme were largest for IPTp adherence, increasing the fraction of pregnant women taking at least two SP doses during pregnancy by 35% relative to the control areas. | Yes: Inclusion of community-based programmes with supply-side interventions substantially increased effective access to malaria prevention, and increase access to | Barriers: Limited availability of intervention (ITNs). Facilitators: training and involvement of community members as volunteers. |

|                                                 |                                                   |                                                                                                                                                 |                                                               |                                                                                    |                                                                                                                                                                                                                                                |                                                                                                                                                                                                               |                                                                                |
|-------------------------------------------------|---------------------------------------------------|-------------------------------------------------------------------------------------------------------------------------------------------------|---------------------------------------------------------------|------------------------------------------------------------------------------------|------------------------------------------------------------------------------------------------------------------------------------------------------------------------------------------------------------------------------------------------|---------------------------------------------------------------------------------------------------------------------------------------------------------------------------------------------------------------|--------------------------------------------------------------------------------|
|                                                 |                                                   | prevention in pregnancy                                                                                                                         |                                                               |                                                                                    |                                                                                                                                                                                                                                                | formal health care access—particularly ANC.                                                                                                                                                                   |                                                                                |
| Ojengbede et al <sup>58</sup> (2010)<br>Nigeria | Kano, Katsina, Oyo (NW, SW) urban health facility | Pre/post intervention evaluation:<br>To examine the impact of the NASG on PPH at four referral facilities in Nigeria                            | Provision of non-pneumatic anti-shock garment (NASG) for PPH. | Childbirth<br><br>Pregnant women                                                   | Mean measured blood loss decreased by 80% between pre-intervention and post-intervention phases. Mortality decreased from 18% pre-intervention to 6% in the NASG phase (RR = 0.31, 95% CI 0.15–0.64, p = 0.0007).                              | Yes: The use of the NASG as part of standard management of PPH and hypovolemic shock at four referral facilities in Nigeria was associated with a significant reduction in blood loss and maternal mortality. | Facilitators: Frequent training, monitoring and evaluation.                    |
| Chiwuzie et al <sup>59</sup> (1997)<br>Nigeria  | Edo (SS) rural community                          | Program evaluation (quasi-experimental design):<br>To evaluate a community intervention designed to increase access to emergency obstetric care | Emergency loan funds to improve access to obstetric care      | Pregnancy<br><br>Women of childbearing age 15-49 years<br>community health workers | Of the 13 clans contacted, 12 successfully launched loan funds. In the 1st year of the operation, 83% of loans requested by women/families were granted and 93% loans were repaid in full. In addition to being used for transport, loans were | Yes: The loan fund improved access and reduced delay in reaching care.                                                                                                                                        | Facilitators: community involvement, quality improvement of health facilities. |

|                                                          |                                                 |                                                                                                                                                                                                                                                                        |                                                                                                                         |                                                |                                                                                                                                                                                                                                                                                           |                                                                                                                                                                                |                                                                                                                                                                                                                     |
|----------------------------------------------------------|-------------------------------------------------|------------------------------------------------------------------------------------------------------------------------------------------------------------------------------------------------------------------------------------------------------------------------|-------------------------------------------------------------------------------------------------------------------------|------------------------------------------------|-------------------------------------------------------------------------------------------------------------------------------------------------------------------------------------------------------------------------------------------------------------------------------------------|--------------------------------------------------------------------------------------------------------------------------------------------------------------------------------|---------------------------------------------------------------------------------------------------------------------------------------------------------------------------------------------------------------------|
|                                                          |                                                 | qualitative methods used                                                                                                                                                                                                                                               |                                                                                                                         |                                                | used to help pay for drugs, blood and hospital fees.                                                                                                                                                                                                                                      |                                                                                                                                                                                |                                                                                                                                                                                                                     |
| Tukur et al <sup>60</sup><br>(2012)<br><br>Nigeria       | Kano (NW)<br>urban and rural<br>health facility | Evaluation of program (quasi-experimental): To evaluate whether a new low-cost strategy for the introduction of magnesium sulphate (MgSO <sub>4</sub> ) for preeclampsia and eclampsia in low- resource areas will result in improved maternal and perinatal outcomes. | Training on the use of MgSO <sub>4</sub> for severe pre-eclampsia and eclampsia in low-resource settings                | Pregnancy<br><br>Pregnant women                | 1,045 patients with severe preeclampsia and eclampsia were treated. The case fatality rate for severe pre- eclampsia and eclampsia fell from 20.9 % (95 % CI 18.7–23.2) to 2.3 % (95 % CI 1.5–3.5). The perinatal mortality rate was 12.3% compared to 35.3 % in a centre using diazepam. | Yes:<br>Introduction of MgSO <sub>4</sub> in low-resource settings led to improved maternal and fetal outcomes in patients presenting with severe pre-eclampsia and eclampsia. | Barriers: health workers resistance to change.                                                                                                                                                                      |
| Prata et al <sup>61</sup><br>(2012)<br><br>International | Kaduna (NW)<br>urban<br>community               | Before -after analysis (quasi-experimental): To demonstrate the role of community mobilization efforts and examine the safety and feasibility of misoprostol distribution for                                                                                          | Birth preparedness and the prevention of postpartum haemorrhage through prophylactic use of misoprostol in home births. | Pregnancy/chil<br>dbirth<br><br>Pregnant women | Community mobilization efforts using TBAs and CORPs reached most women with information about postpartum haemorrhage and misoprostol (88%). Availability of misoprostol at the community level gave over 70% of enrolled                                                                  | Yes:<br>Community mobilization had a significant impact on the successful distribution and uptake of a potentially life-saving health intervention.                            | Barriers: poor diffusion/<br>understanding of health messages led to reluctance to participate in intervention.<br><br>Facilitators:<br>community participation, use of culturally appropriate terms to disseminate |

|                                                 |                                 |                                                                                                                                                                                                                       |                                                                                |                              |                                                                                                                                                                                                                                                                          |                                                                                                                                               |                                                                                  |
|-------------------------------------------------|---------------------------------|-----------------------------------------------------------------------------------------------------------------------------------------------------------------------------------------------------------------------|--------------------------------------------------------------------------------|------------------------------|--------------------------------------------------------------------------------------------------------------------------------------------------------------------------------------------------------------------------------------------------------------------------|-----------------------------------------------------------------------------------------------------------------------------------------------|----------------------------------------------------------------------------------|
|                                                 |                                 | use in home births in Nigeria                                                                                                                                                                                         |                                                                                |                              | women protection against postpartum haemorrhage. Many women demonstrated an understanding of the threshold for postpartum haemorrhage, the risk of death from this disease, and the role of misoprostol in preventing and treating it.                                   |                                                                                                                                               | information about intervention.                                                  |
| Hun Yinbo et al <sup>62</sup> (2008)<br>Nigeria | Ogun (SW) urban health facility | Pre/post evaluation of hospital-based intervention: To evaluate the use of criteria-based audits in improving the quality of hospital-based obstetric care services at the Federal Medical Centre, Abeokuta, Nigeria. | Clinical/practice guidelines for optimal management of obstetric complications | Childbirth<br>Pregnant women | Overall, management of complications such as obstetric haemorrhage, eclampsia, obstructed labour, and genital sepsis improved significantly. Clinical monitoring, drug use, and urgent attention by senior medical staff also improved significantly after intervention. | Yes: Criteria-based clinical audit was feasible and acceptable strategy for improving management of life-threatening obstetric complications. | Barriers: Insufficient supply of essential commodities, low morale of the staff. |



|                                                          |                                                                                                      |                                                                                                                                                                                                                           |                                                                      |                                          |                                                                                                                                                                                                                                                                                                                                                         |                                                                                                                                                                                                                                             |                                                                                                                                                                  |
|----------------------------------------------------------|------------------------------------------------------------------------------------------------------|---------------------------------------------------------------------------------------------------------------------------------------------------------------------------------------------------------------------------|----------------------------------------------------------------------|------------------------------------------|---------------------------------------------------------------------------------------------------------------------------------------------------------------------------------------------------------------------------------------------------------------------------------------------------------------------------------------------------------|---------------------------------------------------------------------------------------------------------------------------------------------------------------------------------------------------------------------------------------------|------------------------------------------------------------------------------------------------------------------------------------------------------------------|
| <p>Okonofua et al<sup>63</sup> (2013)</p> <p>Nigeria</p> | <p>Kano, Lagos, CrossRivers, Plateau, Borno and Enugu (NW, SW, SS, NE, SE) urban health facility</p> | <p>Pre/Post-intervention (Multi-center) study:<br/>To investigate the effectiveness of an intervention aimed at improving the case management of eclampsia</p>                                                            | <p>Health worker training to improve management of pre-eclampsia</p> | <p>Pregnancy<br/><br/>Pregnant women</p> | <p>The post intervention case fatality rate of 3.2 % was significantly less than the pre-intervention rate of 15.1 % (p &lt; 0.001). The overall maternal and perinatal mortality ratios and rates respectively in the hospitals declined from 1199.2 to 954 per 100,000 deliveries and 141.5 to 129.8 per 1000 births, respectively (p &gt; 0.05).</p> | <p>Yes: An intervention to build the capacity of care-providers to use an evidence-based protocol for the treatment of eclampsia in Nigeria was successful in reducing associated case fatality rate, maternal and perinatal mortality.</p> | <p>Barriers: Difficulties in supply of commodities.</p> <p>Facilitators: training and retraining of health providers, monitoring, advocacy to policy makers.</p> |
| <p>Igwegbe et al<sup>64</sup> (2012)</p> <p>Nigeria</p>  | <p>Anambra (SE) urban health facility</p>                                                            | <p>Impact evaluation:<br/>To evaluate the impact of the introduction of the Service Compact with all Nigerians (SERVICOM) contract on maternal health at Nnamdi Azikiwe University Teaching Hospital, Nnewi, Nigeria.</p> | <p>Improve quality of health services through SERVICOM.</p>          | <p>Pregnancy<br/><br/>Pregnant women</p> | <p>There was a progressive reduction in MMR and relative risk of maternal mortality, with a corresponding increase in live births. The presentation-intervention interval improved significantly from 2006. This measure significantly reduced type 3 delays from 2006, and consequently improved maternal</p>                                          | <p>Yes: The resolution by the staff and management to change attitudes and service delivery according to the tenets of SERVICOM led to a gradual and consistent improvement in all service points within</p>                                |                                                                                                                                                                  |

|                                                 |                                            |                                                                                                                                                                                                                                                                     |                                                                       |                                                    |                                                                                                                                                                                                                                                                |                                                                                                                                                                                                           |  |
|-------------------------------------------------|--------------------------------------------|---------------------------------------------------------------------------------------------------------------------------------------------------------------------------------------------------------------------------------------------------------------------|-----------------------------------------------------------------------|----------------------------------------------------|----------------------------------------------------------------------------------------------------------------------------------------------------------------------------------------------------------------------------------------------------------------|-----------------------------------------------------------------------------------------------------------------------------------------------------------------------------------------------------------|--|
|                                                 |                                            |                                                                                                                                                                                                                                                                     |                                                                       |                                                    | mortality. Overall, MMR of 1098 per 100 000 live births in 2004 declined to 691 per 100,000 in 2010.                                                                                                                                                           | the hospital. This measure significantly reduced the delays to treatment and led to reductions in maternal mortality.                                                                                     |  |
| Galadanci et al <sup>66</sup> (2011)<br>Nigeria | Kano and Kaduna (NW) rural health facility | Program evaluation (process and outcome): To assess the 2-year results of an ongoing total quality assurance project in 10 Nigerian hospitals in a rural setting, and their impact on the MMR and fetal mortality ratio (FMR) in these hospitals from 2008 to 2009. | Quality assurance project to improve maternal and neonatal mortality. | Across the continuum of care<br><br>Pregnant women | The mean maternal mortality ratio (MMR) was reduced from 1790 per 100,000 births in the first half of 2008 to 940 per 100 000 births in the second half of 2009. The average fetal mortality ratio (FMR) decreased slightly from 84.9 to 83.5 per 1000 births. | Yes: Continuous monitoring of quality assurance in maternity units raised the awareness of the quality of obstetric performance and improved the quality of care provided, thereby improving MMR and FMR. |  |

1  
2  
3  
4  
5  
6  
7  
8  
9  
10  
11  
12  
13  
14  
15  
16  
17  
18  
19  
20  
21  
22  
23  
24  
25  
26  
27  
28  
29  
30  
31  
32  
33  
34  
35  
36  
37  
38  
39  
40  
41  
42  
43  
44  
45  
46  
47

|                                  |                            |                                                                                                                                                           |                                                                                             |                                                                                          |                                                                                                                                                                                                                                                                                                                                                                                                                                                                                                                                                                                                       |                                                                                                                                                                                                                                  |                                                                                                      |
|----------------------------------|----------------------------|-----------------------------------------------------------------------------------------------------------------------------------------------------------|---------------------------------------------------------------------------------------------|------------------------------------------------------------------------------------------|-------------------------------------------------------------------------------------------------------------------------------------------------------------------------------------------------------------------------------------------------------------------------------------------------------------------------------------------------------------------------------------------------------------------------------------------------------------------------------------------------------------------------------------------------------------------------------------------------------|----------------------------------------------------------------------------------------------------------------------------------------------------------------------------------------------------------------------------------|------------------------------------------------------------------------------------------------------|
| Gummi et al <sup>67</sup> (1997) | Kebbi (NW) rural community | Pre-post intervention assessment:<br>To assess the effect of community education interventions to encourage utilization of emergency obstetric facilities | Community education intervention to increase knowledge and utilisation of health facilities | Across the continuum of care<br><br>Women of childbearing age husbands community leaders | A post-intervention mini survey showed knowledge gains of over 30% among women and men/community's awareness of the causes of maternal death, nature of obstructed labour, signs of pre-eclampsia, need for prompt treatment, and importance of delaying marriage. The increase was greatest on the need for prompt care for women with obstetric complications. The case fatality rate declined from 38 % in 1991 to 5% in 1995. However, utilization of emergency obstetric services did not increase, and a decline was seen in referrals and number of women treated for obstetric complications. | No: Increased awareness of the signs of obstetric complications and the need for prompt treatment among community women and men did not result in greater utilization of emergency obstetric services at the facilities studied. | Barriers: Needing husband's permission to participate, higher costs of emergency obstetric services. |
|----------------------------------|----------------------------|-----------------------------------------------------------------------------------------------------------------------------------------------------------|---------------------------------------------------------------------------------------------|------------------------------------------------------------------------------------------|-------------------------------------------------------------------------------------------------------------------------------------------------------------------------------------------------------------------------------------------------------------------------------------------------------------------------------------------------------------------------------------------------------------------------------------------------------------------------------------------------------------------------------------------------------------------------------------------------------|----------------------------------------------------------------------------------------------------------------------------------------------------------------------------------------------------------------------------------|------------------------------------------------------------------------------------------------------|

|                                                                                                                                                                            |                                                           |                                          |                                                                                                                                                                                    |                                                                                                                  |                                                                            |                                                                                                                                                                                                                                                                                                                                                             |                                                                                                                                                             |                                          |
|----------------------------------------------------------------------------------------------------------------------------------------------------------------------------|-----------------------------------------------------------|------------------------------------------|------------------------------------------------------------------------------------------------------------------------------------------------------------------------------------|------------------------------------------------------------------------------------------------------------------|----------------------------------------------------------------------------|-------------------------------------------------------------------------------------------------------------------------------------------------------------------------------------------------------------------------------------------------------------------------------------------------------------------------------------------------------------|-------------------------------------------------------------------------------------------------------------------------------------------------------------|------------------------------------------|
| 1<br>2<br>3<br>4<br>5<br>6<br>7<br>8<br>9<br>10<br>11<br>12<br>13<br>14<br>15<br>16<br>17<br>18                                                                            | Miller et al <sup>68</sup><br>(2009)<br><br>International | Katsina (NW)<br>urban<br>health facility | Intervention<br>assessment<br>(quasi-<br>experimental):<br>To determine<br>whether the<br>non-pneumatic<br>anti-shock<br>garment<br>(NASG) can<br>improve<br>maternal<br>outcomes. | Non-pneumatic<br>anti-shock<br>garment (NASG)<br>for obstetric<br>haemorrhage.                                   | Childbirth<br><br>Pregnant<br>women                                        | Mean measured blood<br>loss in the<br>intervention phase<br>was 73.5± 93.9mL,<br>compared with<br>340.4±248.2 mL pre-<br>intervention<br>(P<0.001). Maternal<br>mortality was lower<br>in the intervention<br>phase than in the pre-<br>intervention phase (7<br>[8.1%]) vs 21<br>[25.3%]) (RR 0.32;<br>95% CI, 0.14 –0.72).                                | Yes: The<br>NASG showed<br>potential for<br>reducing blood<br>loss and<br>maternal<br>mortality<br>caused by<br>obstetric<br>haemorrhage-<br>related shock. | Barriers: Limited<br>access to services. |
| 19<br>20<br>21<br>22<br>23<br>24<br>25<br>26<br>27<br>28<br>29<br>30<br>31<br>32<br>33<br>34<br>35<br>36<br>37<br>38<br>39<br>40<br>41<br>42<br>43<br>44<br>45<br>46<br>47 | Odusanya et<br>al <sup>69</sup> (2003)<br><br>Nigeria     | Edo (SS)<br>rural<br>community           | Pre-post<br>program<br>evaluation:<br>To compare<br>vaccination<br>coverage<br>obtained at the<br>baseline and<br>post-<br>intervention.                                           | Privately financed<br>immunization<br>program to<br>increase<br>immunization<br>coverage in a rural<br>community | Postnatal<br>(newborn)<br><br>newborns<br>children up to<br>2 years of age | Two years after the<br>program was started,<br>immunization<br>coverage<br>rates were 94% for<br>BCG, 88% for DTP<br>(third dose), and 82%<br>for measles.<br>84% percent of<br>children were fully<br>immunized against all<br>six diseases,<br>compared with 43%<br>at the commencement<br>(p<0.0001). Hepatitis-<br>B coverage (three<br>doses) was 58%. | Yes: The<br>vaccination<br>program has<br>significantly<br>improved<br>vaccination<br>coverage.                                                             |                                          |

|                                                          |                                                                    |                                                                                                                                                                                                                    |                                                                                                                 |                                                       |                                                                                                                                                                                                                                                                                                                                                                                                                                                                          |                                                                                                                                                                   |                                                                                                                                                                                                                                 |
|----------------------------------------------------------|--------------------------------------------------------------------|--------------------------------------------------------------------------------------------------------------------------------------------------------------------------------------------------------------------|-----------------------------------------------------------------------------------------------------------------|-------------------------------------------------------|--------------------------------------------------------------------------------------------------------------------------------------------------------------------------------------------------------------------------------------------------------------------------------------------------------------------------------------------------------------------------------------------------------------------------------------------------------------------------|-------------------------------------------------------------------------------------------------------------------------------------------------------------------|---------------------------------------------------------------------------------------------------------------------------------------------------------------------------------------------------------------------------------|
| <p>Amoran et al<sup>70</sup> (2013)</p> <p>Nigeria</p>   | <p>Ogun (SW) rural community</p>                                   | <p>Intervention evaluation (quasi-experimental): To determine the effect of malaria education programme on the uptake of insecticide-treated nets (ITN) among nursing mothers in rural communities in Nigeria.</p> | <p>Health education intervention on malaria prevention practices among nursing mothers in rural communities</p> | <p>Pregnancy<br/>Nursing mothers</p>                  | <p>Knowledge of indoor spraying increased from 14.7% to 58.2% (P &lt; 0.001) and use of window and door nets increased from 48.3% to 74.8% (P &lt; 0.001). The proportion of those with ITN use increased from 50.8% to 87.4% (P &lt; 0.001) while those with practice of maintaining clean environment also increased from 40.4% to 54.5% (P &lt; 0.001). There were no significant changes in all the practice of malaria prevention methods in the control group.</p> | <p>Yes: Malaria control significantly improved in rural areas, as the caregivers were adequately empowered through appropriate health education intervention.</p> |                                                                                                                                                                                                                                 |
| <p>Okonofua et al<sup>50</sup> (2011)</p> <p>Nigeria</p> | <p>Whole country: 36 states plus FCT rural and urban community</p> | <p>Intervention evaluation (quasi-experimental): To determine the outcome of an advocacy program aimed at implementing a policy of free maternal and child health</p>                                              | <p>Free maternal and child health (MCH) services in Nigeria</p>                                                 | <p>Across the continuum of care<br/>Policy makers</p> | <p>By December 2009, nine States (and FCT) (24.4%) were practicing comprehensive free maternal and child health policy in Nigeria, while 14 states (37.8%) offered partially free services. This represents an increase of eight states (53.3%) over</p>                                                                                                                                                                                                                 | <p>Yes: Advocacy has been successful in building the commitment of high-level government officials in addressing maternal and child health in Nigeria.</p>        | <p>Barriers: Challenges implementing free services, insufficient data to monitor and evaluate program.<br/><br/>Facilitators: commitment of policy makers to the issue, stakeholder engagement, demand creation activities,</p> |

|                                                     |                                                    |                                            |                                                                      |                                                                      |                                                                                                                                                                                                                                                                                                                                                                                                                                                                 |                                                                                                                                                                           |                                                                                        |
|-----------------------------------------------------|----------------------------------------------------|--------------------------------------------|----------------------------------------------------------------------|----------------------------------------------------------------------|-----------------------------------------------------------------------------------------------------------------------------------------------------------------------------------------------------------------------------------------------------------------------------------------------------------------------------------------------------------------------------------------------------------------------------------------------------------------|---------------------------------------------------------------------------------------------------------------------------------------------------------------------------|----------------------------------------------------------------------------------------|
|                                                     |                                                    | (MCH) services in Nigeria.                 |                                                                      |                                                                      | the 15 states that offered free services before the advocacy activities began. Data from one state indicated an increase in ANC utilisation and attendance for delivery and post-natal care.                                                                                                                                                                                                                                                                    |                                                                                                                                                                           | culture of accountability.                                                             |
| Findley et al <sup>72</sup> (2013)<br>International | Katsina, Zamfara and Yobe (NE, NW) rural community | Intervention evaluation quasi-experimental | Community Based Maternal, Newborn and Child Health Service Delivery. | Across the continuum of care<br>Women of childbearing age (15-49yrs) | Anti-tetanus vaccination rates and early breast-feeding rates increased. Compared to the control communities, more than twice as many women in intervention communities knew to watch for specific newborn danger signs and significantly fewer mothers did nothing when their child was sick. The largest changes in care for sick children were seen in the use of medications across intervention areas, leading to improved home care for fever and coughs. | Yes: The community-based approach to promoting improved newborn and sick childcare through community volunteers and CHWs resulted in improved newborn and sick childcare. | Facilitators: Group learning and communication model used as part of program strategy. |

|                                                                                                                                     |                                                                    |                                                                 |                                                                                                                                                                                                                                                                         |                                                                                                   |                                                                                        |                                                                                                                                                                                                                                                                  |                                                                                                                         |                                                                                                                                                                                                 |
|-------------------------------------------------------------------------------------------------------------------------------------|--------------------------------------------------------------------|-----------------------------------------------------------------|-------------------------------------------------------------------------------------------------------------------------------------------------------------------------------------------------------------------------------------------------------------------------|---------------------------------------------------------------------------------------------------|----------------------------------------------------------------------------------------|------------------------------------------------------------------------------------------------------------------------------------------------------------------------------------------------------------------------------------------------------------------|-------------------------------------------------------------------------------------------------------------------------|-------------------------------------------------------------------------------------------------------------------------------------------------------------------------------------------------|
| 1<br>2<br>3<br>4<br>5<br>6<br>7<br>8<br>9<br>10<br>11<br>12<br>13<br>14<br>15<br>16<br>17<br>18<br>19<br>20<br>21<br>22<br>23<br>24 | Pathfinder International <sup>73</sup> (2011)<br><br>International | Kano, Lagos, Borno (NW, SW) rural community and health facility | Intervention evaluation (process and outcome):<br>To improve health system and community structures to enable sustainable change in the quality and coordination of maternal health (MH) service delivery, and to shape MH care-seeking behavior among key populations. | Maternal Health Care Improvement Initiative:<br>Capacity building and Health system strengthening | Across the continuum of care<br><br>Health workers<br>Community and political leaders. | MCHIC members, facility health workers, male motivators, young mother peer educators, CHWs and TBAs were trained in various maternal health care concepts and advocacy. There was an observed increase in community service uptake for skilled birth attendants. | Yes                                                                                                                     | Barriers:<br>Political constraints, inadequate infrastructure, cultural and religious perceptions and practices, poor monitoring and evaluation.<br><br>Facilitators:<br>community involvement. |
| 25<br>26<br>27<br>28<br>29<br>30<br>31<br>32<br>33<br>34                                                                            | Galadanci et al <sup>74</sup> (2010)<br><br>Nigeria                | Kano (NW) rural and urban health facility                       | Impact evaluation:<br>To demonstrate the impact of introduction of free maternity services in Kano state                                                                                                                                                                | Free Maternity Health Service Policy at Secondary Facilities                                      | Across the continuum of care<br><br>Women of childbearing age (15-49yrs)               | Since the introduction of free maternity services in 2001, ANC attendance and facility deliveries. Only 50% of women in the State utilize antenatal clinic.                                                                                                      | No: Despite eight years of free maternity services in Kano State, there is still low utilization of maternity services. | Barriers: Inadequate funding, poor stock of commodities, inadequate infrastructure and staff retention.                                                                                         |
| 35<br>36<br>37<br>38<br>39<br>40<br>41<br>42<br>43<br>44<br>45<br>46<br>47                                                          | Charurat et al <sup>75</sup> (2010)<br><br>International           | Kano, Zamfara and Katsina (NW, NE) urban health facility        | Pre/Post intervention evaluation (mixed methodology):<br>To determine                                                                                                                                                                                                   | Postpartum Systematic Screening                                                                   | Postnatal (mothers and newborn)<br><br>Post-partum women                               | With this postpartum systematic screening checklist, clients attending immunization, newborn care and                                                                                                                                                            | No: The initiative increased screening for postpartum services and                                                      | Barriers: stock outs of commodities, needing husband's permission, long distances, women's                                                                                                      |

|                                             |                                                                                                  |                                                                                                                                             |                                                               |                                                                          |                                                                                                                                                                                                                                                                                                                                                                                                                                                                                                      |                                                                                                               |                                                                                                                                                                                  |
|---------------------------------------------|--------------------------------------------------------------------------------------------------|---------------------------------------------------------------------------------------------------------------------------------------------|---------------------------------------------------------------|--------------------------------------------------------------------------|------------------------------------------------------------------------------------------------------------------------------------------------------------------------------------------------------------------------------------------------------------------------------------------------------------------------------------------------------------------------------------------------------------------------------------------------------------------------------------------------------|---------------------------------------------------------------------------------------------------------------|----------------------------------------------------------------------------------------------------------------------------------------------------------------------------------|
|                                             |                                                                                                  | the effectiveness of systematic screening to increase the use of FP and PFP services in selected MCHIP-supported sites in Northern Nigeria. |                                                               |                                                                          | paediatric/sick baby services were more likely to be screened for FP, postnatal care and immunisation services. In response to high unmet need for FP, the majority (73%) of trained providers knew at least three family planning methods that are suitable for postpartum women, and all of them were providing family planning counselling to pregnant or postpartum women. While family planning referral increase dramatically, only few women (15%) said they would go for referrals same day. | overall quality of counselling/knowledge of providers. It however did not result in an increase in FP uptake. | lack of information about services.                                                                                                                                              |
| Okoli et al <sup>77</sup> (2014)<br>Nigeria | FCT, Nassarawa, Ogun, Kaduna, Zamfara, Bauchi, Anambra, Ebonyi, Bayelsa (NC, SW, NW, NE, SE, SS) | Program evaluation (quasi-experimental design): To describe the use and effect of a Conditional Cash Transfer (CCT)                         | Conditional Cash Transfer (CCT) for maternal and child health | Across the continuum of care<br><br>Women of childbearing age (15-49yrs) | The CCT intervention is associated with a statistically significant increase in the monthly number of women attending four or more ANC visits ( $p < 0.01$ ; 95% confidence interval 7.38 to 22.85). A                                                                                                                                                                                                                                                                                               | Yes: CCT intervention showed significant effects on service uptake, although results for several outcomes of  | Barriers: loss of CCT beneficiaries to follow up, limited capacity of facilities to meet additional work required.<br><br>Facilitators: Collaborations with other organisations, |



|                                                 |                                      |                                                                                                                                                                                      |                                                                                     |                                                                    |                                                                                                                                                                                                                                                                                                                                                                                                   |                                                                                                                                                                         |                                                                                                                                                                                                                                                                   |
|-------------------------------------------------|--------------------------------------|--------------------------------------------------------------------------------------------------------------------------------------------------------------------------------------|-------------------------------------------------------------------------------------|--------------------------------------------------------------------|---------------------------------------------------------------------------------------------------------------------------------------------------------------------------------------------------------------------------------------------------------------------------------------------------------------------------------------------------------------------------------------------------|-------------------------------------------------------------------------------------------------------------------------------------------------------------------------|-------------------------------------------------------------------------------------------------------------------------------------------------------------------------------------------------------------------------------------------------------------------|
|                                                 | rural community                      | programme to encourage use of critical MNCH services among rural women in Nigeria                                                                                                    |                                                                                     |                                                                    | statistically significant increase was also observed in the monthly number of women receiving two or more Tetanus toxoid doses during pregnancy (p < 0.01; 95% CI 9.23 to 34.08). Changes for other outcomes (number of women attending first ANC visit; number of deliveries with skilled attendance; number of neonates receiving OPV at birth) were not found to be statistically significant. | interest were inconclusive.                                                                                                                                             | building trust and promoting utilisation through prompt delivery of intervention.                                                                                                                                                                                 |
| Liu et al <sup>78</sup> (2019)<br>International | Akwa Ibom (SS) urban health facility | Pragmatic randomised control trial: To implement and evaluate a conditional cash transfer (CCT) programme for preventing mother-to-child transmission (PMTCT) in Akwa Ibom, Nigeria. | Conditional Cash Transfer (CCT) to improve utilisation of health services for PMTCT | Pregnancy and postnatal (mother and newborn)<br><br>Pregnant women | Women offered the CCT programme were more likely to give birth at the facility compared to women in standard care. For EID testing there was an absolute difference of 12.8% between those offered the CCT intervention and those in standard care. Over 86% of the facility-delivered newborns received nevirapine,                                                                              | Yes: CCTs improved the likelihood of HIV-positive women giving birth at a facility, of nevirapine being administered to their newborn, and of undergoing EID testing in | Barriers: Challenges with accessing funds/cash, needing to obtaining partner permission, lack of integrated information systems across facilities, requirements to participate and dealing with a new HIV diagnosis.<br><br>Facilitators: Positive encouragement, |

|                                                     |                                                   |                                                                                                                                                                                                      |                                                                              |                                                                      |                                                                                                                                                                                                                                                                                                                                                                   |                                                                                                              |                                                    |
|-----------------------------------------------------|---------------------------------------------------|------------------------------------------------------------------------------------------------------------------------------------------------------------------------------------------------------|------------------------------------------------------------------------------|----------------------------------------------------------------------|-------------------------------------------------------------------------------------------------------------------------------------------------------------------------------------------------------------------------------------------------------------------------------------------------------------------------------------------------------------------|--------------------------------------------------------------------------------------------------------------|----------------------------------------------------|
|                                                     |                                                   |                                                                                                                                                                                                      |                                                                              |                                                                      | and ITT and PP estimates were like those for facility deliveries.                                                                                                                                                                                                                                                                                                 | Akwa Ibom, Nigeria.                                                                                          | regular reminders and counselling of participants. |
| Edu et al <sup>79</sup> (2017)<br>Nigeria           | Cross Rivers (SS) rural and urban health facility | Program evaluation using a mixed method design: To evaluate the effect of a free maternal health care program on the health care-seeking behaviours of pregnant women in Cross River State, Nigeria. | Free Maternal Health Care Program at primary and secondary health facilities | Across the continuum of care<br>Women of childbearing age (15-49yrs) | Results of quantitative data show increase in the percentage of women accessing maternal health services. Qualitative results showed that women perceived that there have been increases in the number of women who utilize Antenatal care, delivery and Post-Partum Care at health facilities, following the removal of direct cost of maternal health services. | Yes: Intervention led to an increase in the number of women who utilise health facilities for their care.    |                                                    |
| Noguchi et al <sup>80</sup> (2020)<br>International | Nassarawa State (NC) urban health facility        | Pragmatic, cluster randomized, controlled trial: To investigate the impact of G-ANC on various maternal newborn health-related outcomes- IPTp                                                        | Grouped Antenatal Care for MIP interventions                                 | Pregnancy<br>Pregnant women                                          | Mean number of IPTp doses received was higher for intervention versus control arm. Reported use of ITN the previous night was similarly high in both arms for mothers in Nigeria (over 92%). Reported ITN use for                                                                                                                                                 | Yes: G-ANC may support uptake of important MIP interventions, particularly IPTp coverage and IPTp-SP uptake. |                                                    |

|                                                     |                                        |                                                                                                                                                                                                                                    |                                   |                                                                                                             |                                                                                                                                                                                                                                                                                                                                                                 |                                                                                                                                                                                           |                                                                                                                                                                                                                                                      |
|-----------------------------------------------------|----------------------------------------|------------------------------------------------------------------------------------------------------------------------------------------------------------------------------------------------------------------------------------|-----------------------------------|-------------------------------------------------------------------------------------------------------------|-----------------------------------------------------------------------------------------------------------------------------------------------------------------------------------------------------------------------------------------------------------------------------------------------------------------------------------------------------------------|-------------------------------------------------------------------------------------------------------------------------------------------------------------------------------------------|------------------------------------------------------------------------------------------------------------------------------------------------------------------------------------------------------------------------------------------------------|
|                                                     |                                        | uptake and insecticide-treated nets (ITN) use.                                                                                                                                                                                     |                                   |                                                                                                             | infants (but not mothers) was higher in the intervention versus control arm in Nigeria.                                                                                                                                                                                                                                                                         |                                                                                                                                                                                           |                                                                                                                                                                                                                                                      |
| Oguntunde et al <sup>81</sup> (2018)<br><br>Nigeria | Kaduna and Jigawa (NW) rural community | Program outcome evaluation: To assess the perceptions of stakeholders and beneficiaries of ETS in two states in northern Nigeria, comparing two models of ETS [stand alone or part of an integrated package of MNH interventions]. | Emergency Transport Schemes (ETS) | Pregnancy and childbirth. Pregnant women husbands community members health workers health service providers | Demand creation activities – especially working with traditional birth attendants and religious leaders – provided a strong linkage between the ETS and families of women in need of emergency transport services. Community members perceived the ETS model that included demand-generating activities as being more reliable and responsive to women’s needs. | Yes: ETS remained a key solution to lack of transport as a barrier to utilizing maternal and newborn health services in emergency situations in many rural and hard-to-reach communities. | Barriers: Security challenges, need for husband's permission, poor road conditions, driver's reluctance to attend to non-emergencies.<br><br>Facilitators: Dedication of drivers in the scheme, integrated approach of program, community awareness. |

1  
2  
3  
4  
5  
6  
7  
8  
9  
10  
11  
12  
13  
14  
15  
16  
17  
18  
19  
20  
21  
22  
23  
24  
25  
26  
27  
28  
29  
30  
31  
32  
33  
34  
35  
36  
37  
38  
39  
40  
41  
42  
43  
44  
45  
46  
47

|                                                                        |                                                                    |                                                                                                                            |                                                                                                              |                                                                        |                                                                                                                                                                                                                                                                                                            |                                                                                                                                     |                                                                                                                                                   |
|------------------------------------------------------------------------|--------------------------------------------------------------------|----------------------------------------------------------------------------------------------------------------------------|--------------------------------------------------------------------------------------------------------------|------------------------------------------------------------------------|------------------------------------------------------------------------------------------------------------------------------------------------------------------------------------------------------------------------------------------------------------------------------------------------------------|-------------------------------------------------------------------------------------------------------------------------------------|---------------------------------------------------------------------------------------------------------------------------------------------------|
| <p>Lalonde &amp; Grellier<sup>82</sup> (2012)</p> <p>International</p> | <p>Edo, Anambra, and Kaduna (SE, SS, NW) urban health facility</p> | <p>Program impact evaluation:<br/>An assessment of FIGO Saving Mothers and Newborns Initiative 2006–2011</p>               | <p>FIGO Saving Mothers and Newborns Initiative: training in emergency obstetric and newborn care (EmONC)</p> | <p>Across the continuum of care</p> <p>Mothers and newborns</p>        | <p>Magnesium sulfate supplied to all State hospitals by Kaduna State Government. Efforts led to the cost of magnesium sulfate reduced by manufacturers. And at least 4 obstetric protocols introduced. Significant reduction (approx. 28%) in maternal mortality due to eclampsia at the project site.</p> | <p>Yes.</p>                                                                                                                         | <p>Barriers: Limited financial resources, civil unrest.</p> <p>Facilitators: community participation and ownership.</p>                           |
| <p>Okeke et al<sup>86</sup> (2017)</p> <p>International</p>            | <p>Enugu, Kwara and Kano (SE, NC, NE) rural community</p>          | <p>Program evaluation-outcome:<br/>To assess the outcomes of the implementation of the Nigeria Midwives Service Scheme</p> | <p>Midwives Service Scheme (MSS)</p>                                                                         | <p>Pregnancy and childbirth.</p> <p>Pregnant women</p> <p>Midwives</p> | <p>A slight increase of the use of antenatal care was observed, with no measurable impact on skilled birth attendance. Findings report important design, implementation and operational challenges that likely contributed to the program's lack of impact.</p>                                            | <p>No: Program achieved only a modest impact on the use of antenatal care and no measurable impact on skilled birth attendance.</p> | <p>Barriers: Problems with the design of program, geographical challenges, limited awareness of clinic services and poor quality of services.</p> |

|                                                                |                                                                          |                                                                                                                                                                                                                                                             |                                                                                                            |                                                                             |                                                                                                                                                                                                                                                                                                                                                                                                                                                                      |                                                                                                                                                                                                                                                                                               |                                                                                                                                                   |
|----------------------------------------------------------------|--------------------------------------------------------------------------|-------------------------------------------------------------------------------------------------------------------------------------------------------------------------------------------------------------------------------------------------------------|------------------------------------------------------------------------------------------------------------|-----------------------------------------------------------------------------|----------------------------------------------------------------------------------------------------------------------------------------------------------------------------------------------------------------------------------------------------------------------------------------------------------------------------------------------------------------------------------------------------------------------------------------------------------------------|-----------------------------------------------------------------------------------------------------------------------------------------------------------------------------------------------------------------------------------------------------------------------------------------------|---------------------------------------------------------------------------------------------------------------------------------------------------|
| <p>Ameh et al<sup>84</sup><br/>(2016)</p> <p>International</p> | <p>Multi-country:<br/>Nigeria included<br/>urban<br/>health facility</p> | <p>Post program<br/>evaluation:<br/>To evaluate the<br/>effectiveness of<br/>Healthcare<br/>provider<br/>training in<br/>Emergency<br/>Obstetric and<br/>Newborn Care<br/>(EmOC&amp;NC)</p>                                                                 | <p>standardised<br/>EmONC training<br/>package</p>                                                         | <p>Across the<br/>continuum of<br/>care</p> <p>Healthcare<br/>providers</p> | <p>99.7% of healthcare<br/>providers improved<br/>their overall score for<br/>knowledge and for<br/>skill. There were<br/>significant<br/>improvements in<br/>knowledge and skills<br/>for each cadre of<br/>healthcare provider<br/>(p&lt;0.05), with the<br/>largest change seen<br/>for recognition and<br/>management of<br/>obstetric<br/>haemorrhage.</p>                                                                                                      | <p>Yes: Short in-<br/>service<br/>EmOC&amp;NC<br/>training was<br/>associated<br/>with improved<br/>knowledge and<br/>skills for<br/>all cadres of<br/>healthcare<br/>providers<br/>working in<br/>maternity<br/>wards.</p>                                                                   | <p>Barriers: Problems<br/>with intervention<br/>design.</p>                                                                                       |
| <p>Bral et al<sup>85</sup><br/>(2017)</p> <p>International</p> | <p>Kwara (NC)<br/>rural<br/>community and<br/>health facility</p>        | <p>Interrupted time<br/>series- (quasi-<br/>experimental<br/>design):<br/>To evaluate the<br/>effect of the<br/>introduction of<br/>a multifaceted<br/>voluntary health<br/>insurance<br/>programme on<br/>hospital<br/>deliveries in<br/>rural Nigeria</p> | <p>Kwara State<br/>Health Insurance<br/>program- a<br/>community-based<br/>health insurance<br/>scheme</p> | <p>Across the<br/>continuum of<br/>care</p> <p>Households</p>               | <p>Insurance coverage<br/>reached up to 70.2%<br/>in four years in the<br/>program area. An<br/>increase in hospital<br/>deliveries was<br/>observed in the<br/>program area during<br/>the 4-year follow-up<br/>period. Even women<br/>who did not enrol in<br/>health insurance but<br/>who could make use<br/>of the upgraded care,<br/>delivered more often<br/>in a hospital during<br/>the follow-up period<br/>than women living in<br/>the control area.</p> | <p>Yes:<br/>Voluntary<br/>health<br/>insurance<br/>combined with<br/>quality<br/>healthcare<br/>services was<br/>highly<br/>effective<br/>in increasing<br/>hospital<br/>deliveries in<br/>rural Nigeria,<br/>by improving<br/>access to<br/>healthcare for<br/>insured and<br/>uninsured</p> | <p>Barriers: Long<br/>distance from<br/>facilities.</p> <p>Facilitators:<br/>Integrated approach,<br/>improvement in<br/>quality of services.</p> |

|                                                          |                                                 |                                                                                                                                                                                                                                                                                     |                                  |                                                                    |                                                                                                                                                                                                                                                                                                                                                                                                                  |                                                                                                                                                                                                                         |                                                                                                                                                                                  |
|----------------------------------------------------------|-------------------------------------------------|-------------------------------------------------------------------------------------------------------------------------------------------------------------------------------------------------------------------------------------------------------------------------------------|----------------------------------|--------------------------------------------------------------------|------------------------------------------------------------------------------------------------------------------------------------------------------------------------------------------------------------------------------------------------------------------------------------------------------------------------------------------------------------------------------------------------------------------|-------------------------------------------------------------------------------------------------------------------------------------------------------------------------------------------------------------------------|----------------------------------------------------------------------------------------------------------------------------------------------------------------------------------|
|                                                          |                                                 |                                                                                                                                                                                                                                                                                     |                                  |                                                                    |                                                                                                                                                                                                                                                                                                                                                                                                                  | women in the program area.                                                                                                                                                                                              |                                                                                                                                                                                  |
| Okeke et al <sup>83</sup><br>(2016)<br><br>International | Whole country-<br>Nigeria<br>rural<br>community | Pre/post<br>program<br>evaluation:<br>To examine the<br>effects of the<br>Midwives<br>Service Scheme<br>(MSS), a public<br>sector program<br>in Nigeria that<br>increased the<br>supply of<br>skilled<br>midwives in<br>rural<br>communities on<br>pregnancy and<br>birth outcomes. | Midwives Service<br>Scheme (MSS) | Pregnancy and<br>childbirth<br><br>Women of<br>childbearing<br>age | The main measured<br>effect of the scheme<br>was a 7.3 percentage<br>point increase in<br>antenatal care use in<br>program clinics and a<br>5-percentage point<br>increase in overall use<br>of antenatal care, both<br>within the first year of<br>the program. We<br>found no statistically<br>significant effect of<br>the scheme on skilled<br>birth attendance or on<br>maternal delivery<br>complications. | No: Minimal<br>improvements<br>seen following<br>the program,<br>highlighting<br>that scaling up<br>supply of<br>midwives may<br>not be<br>sufficient on<br>its own to<br>improve<br>maternal and<br>newborn<br>health. | Barriers: Challenges<br>with retention of<br>midwives in scheme,<br>poor quality of<br>services, low<br>perceived need for<br>services, lack of<br>transportation<br>facilities. |

|                                                           |                                                        |                                                                                                                                                                                                                                                                                                           |                                                                                        |                                                         |                                                                                                                                                                                                                                                                                                                                                                                                                                                      |                                                                                                                                                                                                                                                                                                                            |                                                                                                                                                    |
|-----------------------------------------------------------|--------------------------------------------------------|-----------------------------------------------------------------------------------------------------------------------------------------------------------------------------------------------------------------------------------------------------------------------------------------------------------|----------------------------------------------------------------------------------------|---------------------------------------------------------|------------------------------------------------------------------------------------------------------------------------------------------------------------------------------------------------------------------------------------------------------------------------------------------------------------------------------------------------------------------------------------------------------------------------------------------------------|----------------------------------------------------------------------------------------------------------------------------------------------------------------------------------------------------------------------------------------------------------------------------------------------------------------------------|----------------------------------------------------------------------------------------------------------------------------------------------------|
| <p>Oguntunde et al<sup>88</sup> (2019)</p> <p>Nigeria</p> | <p>Kaduna and Katsina (NW) rural community</p>         | <p>Pre/post intervention evaluation (qualitative): To examine an intervention that educated married men in northern Nigeria about health issues related to pregnancy, labour, delivery, and the postpartum period, as well as newborn and child health, through participation in male support groups.</p> | <p>Men’s support group intervention to increase male involvement in women’s health</p> | <p>Across the continuum of care</p> <p>Married men.</p> | <p>Perceptions of the male support groups were overwhelmingly positive. Participants internalized important messages they learned, which influenced their decisions related to the health of their wives and children. Some take it upon themselves to educate others in their communities about what they learned, and many say they see changes at the community level, with more utilization of maternal, newborn, and child health services.</p> | <p>Yes: In the northern Nigeria context, educating men about danger signs of pregnancy, labour, delivery, newborn, and child health was crucial to improving maternal and newborn health outcomes. The intervention was successful such that the effect of the intervention went beyond participants to the community.</p> | <p>Barriers: Financial cost of associated services.</p> <p>Facilitators: Community of inclusion, positive perceived benefits of participation.</p> |
| <p>Adaji et al<sup>89</sup> (2019)</p> <p>Nigeria</p>     | <p>Kaduna (NW) rural community and health facility</p> | <p>Pre/post intervention assessment: To assess women’s experience of group prenatal care in a rural</p>                                                                                                                                                                                                   | <p>Centering Pregnancy Model- group prenatal care program</p>                          | <p>Pregnancy</p> <p>Pregnant women</p>                  | <p>Mothers who could mention at least five out of eight danger signs of pregnancy increased significantly. Commitment to birth preparedness plans was high. The</p>                                                                                                                                                                                                                                                                                  | <p>Yes: Group prenatal care was acceptable to women and utilised.</p>                                                                                                                                                                                                                                                      | <p>Barriers: Limited health service providers for implementation.</p> <p>Facilitators: positive peer group dynamics and social networks.</p>       |

|                                      |                                |                                                                                                                                                                                  |                                        |                                                    |                                                                                                                                                                                                                                                                                                                                                                                                          |                                                                                                                                                       |                                                                                                                                                                                                                                            |
|--------------------------------------|--------------------------------|----------------------------------------------------------------------------------------------------------------------------------------------------------------------------------|----------------------------------------|----------------------------------------------------|----------------------------------------------------------------------------------------------------------------------------------------------------------------------------------------------------------------------------------------------------------------------------------------------------------------------------------------------------------------------------------------------------------|-------------------------------------------------------------------------------------------------------------------------------------------------------|--------------------------------------------------------------------------------------------------------------------------------------------------------------------------------------------------------------------------------------------|
|                                      |                                | Nigerian community.                                                                                                                                                              |                                        |                                                    | mothers enjoyed the group sessions and shared the lessons they learned with others.                                                                                                                                                                                                                                                                                                                      |                                                                                                                                                       |                                                                                                                                                                                                                                            |
| Onwujekwe et al <sup>90</sup> (2019) | FCT (NC) urban health facility | Post program assessment (Qualitative): To examine the implementation of the NHIS-MCH project and identify barriers and facilitators for implementation, adaptation and scale up. | Free maternal and child health program | Across the continuum of care<br><br>Pregnant women | The program enrolled about 1.5 million pregnant women and children during the period of implementation in the country. The respondents perceived the program as pro-poor, efficient, and effective, and led to marked improvement in the functionality of the facilities, availability of services and reduced out-of-pocket expenditure, which led to increased demand and utilization of MCH services. | Yes: The NHIS-MDG FMCHP had positive impact on the target population though it was not sustained following the conclusion of the MDG program in 2015. | Barriers: Inadequate stakeholder consultation, alleged corrupt practices, human resources challenges, infrastructural challenges, issues with counterpart funding and public financing.<br><br>Facilitators: Problems with project design. |



|                                                                                                                                                                                                                                                    |                                                |                                                                                                                                                                                                                                                                                                    |                                                                                                                                                                            |                                                                 |                                                                                                                                                                                                                                                                                                                                     |                                                                                                                                                                                                                                                 |                                                                                          |
|----------------------------------------------------------------------------------------------------------------------------------------------------------------------------------------------------------------------------------------------------|------------------------------------------------|----------------------------------------------------------------------------------------------------------------------------------------------------------------------------------------------------------------------------------------------------------------------------------------------------|----------------------------------------------------------------------------------------------------------------------------------------------------------------------------|-----------------------------------------------------------------|-------------------------------------------------------------------------------------------------------------------------------------------------------------------------------------------------------------------------------------------------------------------------------------------------------------------------------------|-------------------------------------------------------------------------------------------------------------------------------------------------------------------------------------------------------------------------------------------------|------------------------------------------------------------------------------------------|
| <p>1<br/>2<br/>3<br/>4<br/>5<br/>6<br/>7<br/>8<br/>9<br/>10<br/>11<br/>12<br/>13<br/>14<br/>15<br/>16<br/>17<br/>18<br/>19<br/>20<br/>21</p> <p>Brown et al<sup>91</sup><br/>(2016)<br/><br/>Nigeria</p>                                           | <p>Oyo (SW)<br/>urban<br/>community</p>        | <p>Cluster<br/>randomized<br/>control trial:<br/>To evaluate the<br/>effect of<br/>reminder/recall<br/>system and<br/>Primary Health<br/>Care<br/>Immunization<br/>Providers'<br/>Training<br/>(PHCIPT)<br/>intervention on<br/>routine<br/>immunization<br/>completion<br/>among infants.</p>     | <p>Community Nurse<br/>led<br/>Reminder/Recall<br/>(R/R) system<br/>Alone and in<br/>combination with<br/>Primary Health<br/>care immunization<br/>providers' training</p> | <p>Postnatal<br/>(infant)<br/><br/>Mothers and<br/>infants.</p> | <p>Cell phone<br/>reminder/recall was<br/>associated with the<br/>highest immunization<br/>completion rates<br/>among the children in<br/>the study.</p>                                                                                                                                                                            | <p>Yes: cell<br/>phone<br/>reminder/recall<br/>was effective<br/>in improving<br/>immunization<br/>completion<br/>rates.</p>                                                                                                                    |                                                                                          |
| <p>22<br/>23<br/>24<br/>25<br/>26<br/>27<br/>28<br/>29<br/>30<br/>31<br/>32<br/>33<br/>34<br/>35<br/>36<br/>37<br/>38<br/>39<br/>40<br/>41<br/>42<br/>43<br/>44<br/>45<br/>46<br/>47</p> <p>Asa et al<sup>92</sup><br/>(2008)<br/><br/>Nigeria</p> | <p>Osun (SW)<br/>rural<br/>health facility</p> | <p>Open<br/>randomised<br/>control trial:<br/>To evaluate the<br/>efficacy of<br/>intermittent<br/>preventive<br/>treatment of<br/>malaria using<br/>sulphadoxine-<br/>pyrimethamine<br/>(SP) in the<br/>prevention of<br/>anaemia in<br/>women of low<br/>parity in a low<br/>socio-economic,</p> | <p>Intermittent<br/>Preventive<br/>Therapy in<br/>Pregnancy IPT-p<br/>for malaria using<br/>sulphadoxine-<br/>pyrimethamine<br/>(SP)</p>                                   | <p>Pregnancy<br/><br/>Pregnant<br/>women</p>                    | <p>33 (22.6%) and 52<br/>(37.1%) women in the<br/>study and control<br/>groups, respectively,<br/>had anaemia. With<br/>multivariate analysis,<br/>the difference in the<br/>incidence of anaemia<br/>in the two groups<br/>remained significant<br/>(p = 0.01; odds ratio =<br/>0.5; 95% confidence<br/>interval = 0.29–0.85).</p> | <p>Yes: The IPT<br/>regime with<br/>sulphadoxine-<br/>pyrimethamine<br/>is an effective,<br/>practicable<br/>strategy to<br/>decrease risk<br/>of anaemia in<br/>women of low<br/>parity residing<br/>in areas<br/>endemic for<br/>malaria.</p> | <p>Facilitators:<br/>acceptability of<br/>intervention among<br/>target populations.</p> |

|                                              |                                                  |                                                                                                                                                                                                  |                                                        |                                                          |                                                                                                                                                                                                                                                                                                                                                                                                                                                                                                        |                                                                                                                                                                                                                             |  |
|----------------------------------------------|--------------------------------------------------|--------------------------------------------------------------------------------------------------------------------------------------------------------------------------------------------------|--------------------------------------------------------|----------------------------------------------------------|--------------------------------------------------------------------------------------------------------------------------------------------------------------------------------------------------------------------------------------------------------------------------------------------------------------------------------------------------------------------------------------------------------------------------------------------------------------------------------------------------------|-----------------------------------------------------------------------------------------------------------------------------------------------------------------------------------------------------------------------------|--|
|                                              |                                                  | malaria endemic setting.                                                                                                                                                                         |                                                        |                                                          |                                                                                                                                                                                                                                                                                                                                                                                                                                                                                                        |                                                                                                                                                                                                                             |  |
| Walker et al <sup>93</sup> (2018)<br>Nigeria | Katsina (NW) rural community and health facility | Post intervention evaluation (quasi-experimental design):<br>To assess the impact of Muslim opinion leaders' training of healthcare providers on the uptake of MNCH services in Northern Nigeria | Muslim Opinion Leaders' led training of health workers | Across the continuum of care<br><br>Healthcare providers | The result indicates a significant difference both in perception and in practices between healthcare providers in intervention and control facilities, with respect to MNCH uptake. Access to services was higher in intervention facilities than in control facilities, with routine immunisation (including polio) recording highest hospital visits followed by other MNCH services related to pregnancy/child development. Family planning and hospital delivery were the least accessed services. | Yes: The healthcare providers who received trainings on Islamic precepts related to MNCH were able to spend greater amount of time with clients, providing counselling on Islam and MNCH. This led to improvements in MNCH. |  |

|                                                           |                                                        |                                                                                                                                                                                                               |                                                                                                                            |                                                                               |                                                                                                                                                                                                    |                                                                                                                                                                                                                   |                                                                                            |
|-----------------------------------------------------------|--------------------------------------------------------|---------------------------------------------------------------------------------------------------------------------------------------------------------------------------------------------------------------|----------------------------------------------------------------------------------------------------------------------------|-------------------------------------------------------------------------------|----------------------------------------------------------------------------------------------------------------------------------------------------------------------------------------------------|-------------------------------------------------------------------------------------------------------------------------------------------------------------------------------------------------------------------|--------------------------------------------------------------------------------------------|
| <p>Ehigiegba et al<sup>94</sup> (2012)</p> <p>Nigeria</p> | <p>Rivers (SS) urban community and health facility</p> | <p>Post program evaluation: To assess the implementation of a PMTCT program in a semi-urban cottage hospital, with a community health insurance scheme.</p>                                                   | <p>Community Health Insurance Scheme to promote the utilisation of MNCH services</p>                                       | <p>Across the continuum of care</p> <p>Pregnant women.</p>                    | <p>Service utilisation increased significantly. Average deliveries increased from about 20 to 120 per month. New infections were less than 2% in the period compared to 29% prior to the CHIS.</p> | <p>Yes: CHIS encouraged women to book early for ANC, which improved utilisation of VCT and other PMTCT services.</p>                                                                                              | <p>Facilitators: active community engagement, integration/ coordination of activities.</p> |
| <p>Adeleye et al<sup>95</sup> (2011)</p> <p>Nigeria</p>   | <p>Edo (SS) rural community</p>                        | <p>Program process and outcome evaluation: To describe the development and implementation process of the Ekiador safe motherhood program and to analyze how it improved maternal health in the community.</p> | <p>Ekiador safe motherhood program: communication intervention to increase positive male engagement in maternal health</p> | <p>Across the continuum of care</p> <p>Community elders young adult males</p> | <p>A useful communication intervention was developed that increased the possibility of positive male engagement in maternal health.</p>                                                            | <p>Yes: Through small-group health talks, the male leaders in Ekiador, Southern Nigeria, became motivated to act as change agents and encouraged other men to assist with maternal health in their community.</p> | <p>Facilitators: delivery of intervention in line with local governance and customs</p>    |

|                                                                 |                                               |                                                                                                                                                                                                                                                                                                                                                     |                                                                                                                                                                       |                                                        |                                                                                                                                                                                                                                                                                                                                                                                                                  |                                                                                                                                                                                                                                                                                                    |                                                                                                                                                                   |
|-----------------------------------------------------------------|-----------------------------------------------|-----------------------------------------------------------------------------------------------------------------------------------------------------------------------------------------------------------------------------------------------------------------------------------------------------------------------------------------------------|-----------------------------------------------------------------------------------------------------------------------------------------------------------------------|--------------------------------------------------------|------------------------------------------------------------------------------------------------------------------------------------------------------------------------------------------------------------------------------------------------------------------------------------------------------------------------------------------------------------------------------------------------------------------|----------------------------------------------------------------------------------------------------------------------------------------------------------------------------------------------------------------------------------------------------------------------------------------------------|-------------------------------------------------------------------------------------------------------------------------------------------------------------------|
| <p>Haver et al<sup>96</sup><br/>(2015)</p> <p>International</p> | <p>Akwa Ibom (SS)<br/>rural<br/>community</p> | <p>Program<br/>evaluation:<br/>To describe<br/>outcomes,<br/>commonalities<br/>and lessons<br/>learned from<br/>country<br/>programs in<br/>which tasks in<br/>health<br/>promotion and<br/>distribution of<br/>commodities<br/>were<br/>intentionally<br/>shifted from<br/>skilled<br/>providers to<br/>CHWs to<br/>advance MNH<br/>strategies</p> | <p>CHW-led IPTp<br/>provision,<br/>insecticide-treated<br/>net distribution as<br/>part of a<br/>community-<br/>directed<br/>intervention for<br/>malaria control</p> | <p>Pregnancy<br/><br/>Community<br/>health workers</p> | <p>The effects of the CDI<br/>program were largest<br/>for IPTp adherence,<br/>increasing the<br/>proportion of<br/>pregnant women<br/>taking at least two<br/>sulfadoxine-<br/>pyrimethamine doses<br/>during pregnancy by<br/>five times in the CDI<br/>communities<br/>compared with three<br/>times in the control<br/>group, for whom IPTp<br/>was available only at<br/>prenatal care<br/>(P&lt;0.001)</p> | <p>Yes: The<br/>health<br/>promotion and<br/>distribution of<br/>commodities<br/>afforded by<br/>these<br/>community<br/>based<br/>strategies<br/>yielded greater<br/>uptake of<br/>interventions<br/>than would<br/>have been<br/>achieved<br/>through<br/>facility-based<br/>services alone.</p> | <p>Barriers: poor access<br/>to underserved areas<br/>and absence of<br/>political will and<br/>commitment.</p> <p>Facilitators:<br/>community<br/>engagement</p> |
|-----------------------------------------------------------------|-----------------------------------------------|-----------------------------------------------------------------------------------------------------------------------------------------------------------------------------------------------------------------------------------------------------------------------------------------------------------------------------------------------------|-----------------------------------------------------------------------------------------------------------------------------------------------------------------------|--------------------------------------------------------|------------------------------------------------------------------------------------------------------------------------------------------------------------------------------------------------------------------------------------------------------------------------------------------------------------------------------------------------------------------------------------------------------------------|----------------------------------------------------------------------------------------------------------------------------------------------------------------------------------------------------------------------------------------------------------------------------------------------------|-------------------------------------------------------------------------------------------------------------------------------------------------------------------|

## Search strategy and terms

### PubMed search terms: 1<sup>st</sup> June, 2020.

((("Maternal Health"[Mesh]) OR "Infant, Newborn"[Mesh]) OR "Infant Health"[Mesh]) AND "Nigeria"[Mesh]) AND (("intervention" OR "program" OR "strategy"))

### Embase search strategy: 11<sup>th</sup> July, 2020

1. "Maternal Health".mp. or maternal welfare/
2. "Infant, newborn".mp. or newborn/
3. "infant health".mp. or child health/
4. newborn care/ or "Newborn Health".mp.
5. 1 or 2 or 3 or 4
6. Nigeria.mp. [mp=title, abstract, heading word, drug trade name, original title, device manufacturer, drug manufacturer, device trade name, keyword, floating subheading word, candidate term word]
7. ("intervention" or "program" or "strategy").mp. [mp=title, abstract, heading word, drug trade name, original title, device manufacturer, drug manufacturer, device trade name, keyword, floating subheading word, candidate term word]
8. 5 and 6 and 7

### Scopus search terms: 22<sup>nd</sup> July, 2020.

{maternal health} AND {newborn health} AND "Nigeria" AND "intervention" OR "program\*".

### Websites of key organisations searched on Google 22<sup>nd</sup> July 2020.

Jhpiego

USAID/Maternal and Child Survival Program

Maternal Newborn Child Health (MNCH2) program

World Health Organisation

United Nations Children's Fund

Bill and Melinda Gates Foundation

## Preferred Reporting Items for Systematic reviews and Meta-Analyses extension for Scoping Reviews (PRISMA-ScR) Checklist

| SECTION                           | ITEM | PRISMA-ScR CHECKLIST ITEM                                                                                                                                                                                                                                                                                  | REPORTED ON PAGE #   |
|-----------------------------------|------|------------------------------------------------------------------------------------------------------------------------------------------------------------------------------------------------------------------------------------------------------------------------------------------------------------|----------------------|
| <b>TITLE</b>                      |      |                                                                                                                                                                                                                                                                                                            |                      |
| Title                             | 1    | Identify the report as a scoping review.                                                                                                                                                                                                                                                                   | 1                    |
| <b>ABSTRACT</b>                   |      |                                                                                                                                                                                                                                                                                                            |                      |
| Structured summary                | 2    | Provide a structured summary that includes (as applicable): background, objectives, eligibility criteria, sources of evidence, charting methods, results, and conclusions that relate to the review questions and objectives.                                                                              | 2                    |
| <b>INTRODUCTION</b>               |      |                                                                                                                                                                                                                                                                                                            |                      |
| Rationale                         | 3    | Describe the rationale for the review in the context of what is already known. Explain why the review questions/objectives lend themselves to a scoping review approach.                                                                                                                                   | 4,5                  |
| Objectives                        | 4    | Provide an explicit statement of the questions and objectives being addressed with reference to their key elements (e.g., population or participants, concepts, and context) or other relevant key elements used to conceptualize the review questions and/or objectives.                                  | 5                    |
| <b>METHODS</b>                    |      |                                                                                                                                                                                                                                                                                                            |                      |
| Protocol and registration         | 5    | Indicate whether a review protocol exists; state if and where it can be accessed (e.g., a Web address); and if available, provide registration information, including the registration number.                                                                                                             | N/A                  |
| Eligibility criteria              | 6    | Specify characteristics of the sources of evidence used as eligibility criteria (e.g., years considered, language, and publication status), and provide a rationale.                                                                                                                                       | 6,7                  |
| Information sources*              | 7    | Describe all information sources in the search (e.g., databases with dates of coverage and contact with authors to identify additional sources), as well as the date the most recent search was executed.                                                                                                  | 6                    |
| Search                            | 8    | Present the full electronic search strategy for at least 1 database, including any limits used, such that it could be repeated.                                                                                                                                                                            | Supplementary file 2 |
| Selection of sources of evidence† | 9    | State the process for selecting sources of evidence (i.e., screening and eligibility) included in the scoping review.                                                                                                                                                                                      | 6                    |
| Data charting process‡            | 10   | Describe the methods of charting data from the included sources of evidence (e.g., calibrated forms or forms that have been tested by the team before their use, and whether data charting was done independently or in duplicate) and any processes for obtaining and confirming data from investigators. | 6,7                  |
| Data items                        | 11   | List and define all variables for which data were sought and any assumptions and simplifications made.                                                                                                                                                                                                     | 6                    |
| Critical appraisal of individual  | 12   | If done, provide a rationale for conducting a critical appraisal of included sources of evidence; describe                                                                                                                                                                                                 | N/A                  |

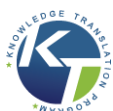

| SECTION                                       | ITEM | PRISMA-ScR CHECKLIST ITEM                                                                                                                                                                       | REPORTED ON PAGE #   |
|-----------------------------------------------|------|-------------------------------------------------------------------------------------------------------------------------------------------------------------------------------------------------|----------------------|
| sources of evidence§                          |      | the methods used and how this information was used in any data synthesis (if appropriate).                                                                                                      |                      |
| Synthesis of results                          | 13   | Describe the methods of handling and summarizing the data that were charted.                                                                                                                    | 6,7                  |
| <b>RESULTS</b>                                |      |                                                                                                                                                                                                 |                      |
| Selection of sources of evidence              | 14   | Give numbers of sources of evidence screened, assessed for eligibility, and included in the review, with reasons for exclusions at each stage, ideally using a flow diagram.                    | 8                    |
| Characteristics of sources of evidence        | 15   | For each source of evidence, present characteristics for which data were charted and provide the citations.                                                                                     | Table 2, 10          |
| Critical appraisal within sources of evidence | 16   | If done, present data on critical appraisal of included sources of evidence (see item 12).                                                                                                      | N/A                  |
| Results of individual sources of evidence     | 17   | For each included source of evidence, present the relevant data that were charted that relate to the review questions and objectives.                                                           | Supplementary file 1 |
| Synthesis of results                          | 18   | Summarize and/or present the charting results as they relate to the review questions and objectives.                                                                                            | 8-11                 |
| <b>DISCUSSION</b>                             |      |                                                                                                                                                                                                 |                      |
| Summary of evidence                           | 19   | Summarize the main results (including an overview of concepts, themes, and types of evidence available), link to the review questions and objectives, and consider the relevance to key groups. | 12, 13               |
| Limitations                                   | 20   | Discuss the limitations of the scoping review process.                                                                                                                                          | 13                   |
| Conclusions                                   | 21   | Provide a general interpretation of the results with respect to the review questions and objectives, as well as potential implications and/or next steps.                                       | 13                   |
| <b>FUNDING</b>                                |      |                                                                                                                                                                                                 |                      |
| Funding                                       | 22   | Describe sources of funding for the included sources of evidence, as well as sources of funding for the scoping review. Describe the role of the funders of the scoping review.                 | 1                    |

JB1 = Joanna Briggs Institute; PRISMA-ScR = Preferred Reporting Items for Systematic reviews and Meta-Analyses extension for Scoping Reviews.

\* Where *sources of evidence* (see second footnote) are compiled from, such as bibliographic databases, social media platforms, and Web sites.

† A more inclusive/heterogeneous term used to account for the different types of evidence or data sources (e.g., quantitative and/or qualitative research, expert opinion, and policy documents) that may be eligible in a scoping review as opposed to only studies. This is not to be confused with *information sources* (see first footnote).

‡ The frameworks by Arksey and O'Malley (6) and Levac and colleagues (7) and the JBI guidance (4, 5) refer to the process of data extraction in a scoping review as data charting.

§ The process of systematically examining research evidence to assess its validity, results, and relevance before using it to inform a decision. This term is used for items 12 and 19 instead of "risk of bias" (which is more applicable to systematic reviews of interventions) to include and acknowledge the various sources of evidence that may be used in a scoping review (e.g., quantitative and/or qualitative research, expert opinion, and policy document).

From: Tricco AC, Lillie E, Zarin W, O'Brien KK, Colquhoun H, Levac D, et al. PRISMA Extension for Scoping Reviews (PRISMA-ScR): Checklist and Explanation. *Ann Intern Med.* 2018;169:467–473. doi: 10.7326/M18-0850.

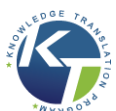

St. Michael's

Inspired Care.  
Inspiring Science.

For peer review only - <http://bmjopen.bmj.com/site/about/guidelines.xhtml>

# BMJ Open

## A scoping review of maternal and newborn health interventions and programs in Nigeria.

|                                 |                                                                                                                                                                                                                                                                                                                                                                                                                                                                                                                                            |
|---------------------------------|--------------------------------------------------------------------------------------------------------------------------------------------------------------------------------------------------------------------------------------------------------------------------------------------------------------------------------------------------------------------------------------------------------------------------------------------------------------------------------------------------------------------------------------------|
| Journal:                        | <i>BMJ Open</i>                                                                                                                                                                                                                                                                                                                                                                                                                                                                                                                            |
| Manuscript ID                   | bmjopen-2021-054784.R1                                                                                                                                                                                                                                                                                                                                                                                                                                                                                                                     |
| Article Type:                   | Original research                                                                                                                                                                                                                                                                                                                                                                                                                                                                                                                          |
| Date Submitted by the Author:   | 14-Nov-2021                                                                                                                                                                                                                                                                                                                                                                                                                                                                                                                                |
| Complete List of Authors:       | Nasir, Naima; Jos University Teaching Hospital, APIN Clinic; University of Oxford, Center for Tropical Medicine and Global Health, Nuffield Department of Medicine<br>Aderoba, Adeniyi; Department of Obstetrics and Gynecology, Mother and Child Hospital, Akure, Dept of Obstetrics and Gynaecology; University of Oxford, Center for Tropical Medicine and Global Health, Nuffield Department of Medicine.<br>Ariana, Proochista; University of Oxford, Center for Tropical Medicine and Global Health, Nuffield Department of Medicine |
| <b>Primary Subject Heading</b>: | Global health                                                                                                                                                                                                                                                                                                                                                                                                                                                                                                                              |
| Secondary Subject Heading:      | Obstetrics and gynaecology, Public health, Health policy                                                                                                                                                                                                                                                                                                                                                                                                                                                                                   |
| Keywords:                       | PUBLIC HEALTH, OBSTETRICS, Health policy < HEALTH SERVICES ADMINISTRATION & MANAGEMENT, Maternal medicine < OBSTETRICS, PERINATOLOGY                                                                                                                                                                                                                                                                                                                                                                                                       |
|                                 |                                                                                                                                                                                                                                                                                                                                                                                                                                                                                                                                            |

SCHOLARONE™  
Manuscripts





I, the Submitting Author has the right to grant and does grant on behalf of all authors of the Work (as defined in the below author licence), an exclusive licence and/or a non-exclusive licence for contributions from authors who are: i) UK Crown employees; ii) where BMJ has agreed a CC-BY licence shall apply, and/or iii) in accordance with the terms applicable for US Federal Government officers or employees acting as part of their official duties; on a worldwide, perpetual, irrevocable, royalty-free basis to BMJ Publishing Group Ltd ("BMJ") its licensees and where the relevant Journal is co-owned by BMJ to the co-owners of the Journal, to publish the Work in this journal and any other BMJ products and to exploit all rights, as set out in our [licence](#).

The Submitting Author accepts and understands that any supply made under these terms is made by BMJ to the Submitting Author unless you are acting as an employee on behalf of your employer or a postgraduate student of an affiliated institution which is paying any applicable article publishing charge ("APC") for Open Access articles. Where the Submitting Author wishes to make the Work available on an Open Access basis (and intends to pay the relevant APC), the terms of reuse of such Open Access shall be governed by a Creative Commons licence – details of these licences and which [Creative Commons](#) licence will apply to this Work are set out in our licence referred to above.

Other than as permitted in any relevant BMJ Author's Self Archiving Policies, I confirm this Work has not been accepted for publication elsewhere, is not being considered for publication elsewhere and does not duplicate material already published. I confirm all authors consent to publication of this Work and authorise the granting of this licence.

1  
2  
3 **A scoping review of maternal and newborn health interventions and**  
4  
5  
6 **programs in Nigeria.**  
7  
8

9 **Authors**

10  
11 Naima Nasir<sup>1,2</sup>, Adeniyi Kolade Aderoba<sup>1,3,4</sup>, Proochista Ariana<sup>1</sup>.  
12

13  
14 Corresponding author: Naima Nasir. Email: [naima.nasir@ndm.ox.ac.uk](mailto:naima.nasir@ndm.ox.ac.uk), Center for Tropical  
15  
16 Medicine and Global Health, Peter Medawar Building for Pathogen Research, South Parks  
17  
18 Road, Oxford, OX1 3SY, UK.  
19

20 **Affiliations:**

- 21  
22 1. Centre for Tropical Medicine and Global Health, Nuffield Department of Medicine,  
23 University of Oxford, Oxford, United Kingdom.  
24 2. Infectious Disease Unit (APIN), Jos University Teaching Hospital, Jos, Nigeria.  
25 3. National Perinatal Epidemiology Unit, University of Oxford, Oxford, United Kingdom.  
26 4. Department of Obstetrics and Gynecology, Mother and Child Hospital, Akure, Nigeria  
27

28  
29 Word count: 3,537.  
30

31  
32 **Keywords:** maternal health, newborn health, neonatal health, interventions, programs, MNH,  
33  
34 RMNCAH, maternal morbidity and mortality, newborn morbidity and mortality, maternal  
35  
36 and newborn health measurement, SDGs, Nigeria.  
37  
38  
39  
40  
41  
42  
43  
44  
45  
46  
47  
48  
49  
50  
51  
52  
53  
54  
55  
56  
57  
58  
59  
60

## Abstract

### Objective

To systematically scope and map research regarding interventions, programs, or strategies to improve maternal and newborn health (MNH) in Nigeria.

### Design: Scoping review

### Data sources and eligibility criteria

Systematic searches were conducted from 1<sup>st</sup> June to 22<sup>nd</sup> July 2020 in PubMed, Embase, Scopus, together with a search of the grey literature. Publications presenting interventions and programs to improve maternal or newborn health or both in Nigeria were included.

### Data extraction and analysis

The data extracted included source and year of publication, geographical setting, study design, target population(s), type of intervention/program, reported outcomes, and any reported facilitators or barriers. Data analysis involved descriptive numerical summaries and qualitative content analysis. We summarised the evidence using a framework combining WHO recommendations for MNH, the continuum of care, and the social determinants of health frameworks to identify gaps where further research and action may be needed.

### Results

A total of 80 publications were included in this review. Most interventions (71%) were aligned with WHO recommendations, and half (n=40) targeted the pregnancy and childbirth stages of the continuum of care. Most of the programs (n=74) examined the intermediate social determinants of maternal health related to health system factors within health facilities, with only a few interventions aimed at structural social determinants. An integrated approach to implementation and funding constraints were among factors reported as facilitators and barriers, respectively.

### Conclusion

Using an integrated framework, we found most MNH interventions in Nigeria were aligned with the WHO recommendations and focused on the intermediate social determinants of health within health facilities. We determined a paucity of research on interventions targeting the structural social determinants and community-based approaches, and limited attention to pre-pregnancy interventions. To accelerate progress towards the SDG MNH targets, greater focus on implementing interventions and measuring context-specific challenges beyond the health facility is required.

## Article summary

### Strengths and limitations of this study

- A comprehensive search strategy was used including three (3) large databases (PubMed, Embase and Scopus) as well as grey literature.
- The review employed a unique framework to map the evidence and identify gaps in maternal and newborn health (MNH) research and action in Nigeria- using an integrated framework combining the WHO recommendations for MNH, the continuum of care model for maternal health and the social determinants of health.
- We recognise there may be publication bias, as not all interventions/programs for MNH in Nigeria may have been published and captured in the study.

## Introduction

Nigeria has the second highest estimated maternal deaths globally, and accounts for one of the highest neonatal mortality rates in Africa<sup>1,2</sup>. The World Health Organisation (WHO) estimates the maternal mortality ratio (MMR) to be over 800 maternal deaths per 100,000 live births with a neonatal mortality rate of 33 per 1000 live births<sup>1,3</sup> in 2019. These figures contrast with corresponding figures from the UK and the USA which are around 10 to 18 deaths per 100,000 live births, respectively, with neonatal mortality rates below 4 deaths per 1000 live births<sup>1,2</sup>. Maternal and newborn health outcomes are intricately linked; maternal deaths significantly affect newborn survival and development<sup>4-6</sup>. The Sustainable Development Goal (SDG) 3 calls for all countries to reduce maternal mortality ratios to less than 70 per 100 000 live births and neonatal mortality to less than 12 deaths per 1,000 live births by 2030<sup>1,7</sup>. However, if current trends continue, Nigeria will fall far short of these targets despite existing efforts and resource allocations<sup>8</sup>. Of note, the global maternal and newborn health community has recently intensified efforts on innovative indicators to measure progress in maternal and newborn health towards achieving the SDG targets<sup>9-11</sup>.

Most maternal deaths in Nigeria are reportedly due to preventable obstetric causes<sup>6</sup>. Furthermore, complications of preterm birth, intrapartum events, and infections account for over 80% of newborn deaths and stillbirths<sup>1,6,12</sup>. Underlying these conditions, socioeconomic, cultural, political, and environmental factors contribute to the persistently high and inequitable burden of maternal and neonatal mortality in Nigeria<sup>7</sup>. The highest rates of deaths and morbidity occur among the poor, rural communities, where many challenges to improve maternal and newborn health remain<sup>8,13</sup>. In addition, some religious and sociocultural norms adversely influence health-seeking behaviour and expose women to discriminatory practices which pose serious health risks<sup>8,13</sup>. Addressing these underlying social conditions and inequities will not only facilitate efforts to improve maternal and neonatal mortality and morbidity but may improve other dimensions of health and well-being.

Beyond the clinical causes and social determinants that underpin maternal and newborn morbidity and mortality, evidence shows that coordinated strategies across the reproductive, maternal, newborn, child and adolescent health continuum of care improves the general well-being of young women and mothers and the development of newborns<sup>4,6</sup>. Thus, the WHO recommends the “essential packages of interventions for low and middle-income settings” should be provided across the continuum of care to improve maternal and newborn health<sup>5,14</sup>.

1  
2  
3  
4  
5  
6  
7  
8  
9  
10  
11  
12  
13  
14  
15  
16  
17  
18  
19  
20  
21  
22  
23  
24  
25  
26  
27  
28  
29  
30  
31  
32  
33  
34  
35  
36  
37  
38  
39  
40  
41  
42  
43  
44  
45  
46  
47  
48  
49  
50  
51  
52  
53  
54  
55  
56  
57  
58  
59  
60

16. Such interventions include family planning, appropriate antenatal care, immediate thermal care for newborns and early initiation of exclusive breastfeeding amongst others. Furthermore, increasing evidence suggests that addressing maternal health inequities through action on the social determinants of health can significantly improve maternal and newborn health outcomes<sup>17</sup>.

It is not entirely clear why, despite laudable efforts to improve the situation in Nigeria, the burden of maternal and newborn mortality and morbidity persists<sup>8</sup>. Understanding the evidence and gaps for maternal and neonatal health interventions and programs will help to identify areas to focus new MNH measurement tools and direct future resource allocations.

This study aims to systematically scope and map the published literature on interventions, programs, or strategies implemented to improve maternal and newborn health in Nigeria. By integrating and applying existing key frameworks in maternal and newborn health<sup>17–20</sup>, this study identifies evidence gaps that require further research and highlights areas where action is needed. The following objectives were formulated following an initial exploratory search:

- a) Outline the types of interventions for maternal and newborn health in Nigeria and their characteristics.
- b) Describe the nature and range of evidence.
- c) Elaborate the study settings and target populations.
- d) Examine reported evidence of outcomes or effectiveness or impact.
- e) Identify reported facilitators and barriers of effective implementation of interventions.

## Methods

The review was conducted according to the methodological guidance for scoping reviews provided by the Joanna Briggs Institute (JBI) manual for evidence synthesis<sup>21</sup>. The main research question guiding the review was: what is the evidence available for maternal and newborn health interventions in Nigeria? An intervention was defined as “a single or a combination of program elements or strategies designed to produce behavioural changes or improve health status, outcomes, or both among individuals or an entire population”<sup>22</sup>. We focused on research studies evaluating the effectiveness of interventions on outcomes related to maternal and newborn health.

## Search strategy

A preliminary database search was undertaken to identify keywords and index terms for articles related to the review topic and refine the search strategy. Thereafter, the definitive search of search of PubMed, Embase (via OVID), and Scopus (via OVID) was conducted by NN between June and July 2020 to identify relevant publications. The searches were updated in May 2021 by rerunning the searches and through email alerts. The search expressions in PubMed including keywords and MeSH terms used were: “Maternal Health” OR “Infant, Newborn” OR “Infant Health” AND “Nigeria” AND (intervention OR program OR strategy). No filter was used to restrict results. Similar search terms were used for the other databases. A summary of the search strategy for each database is provided (Supplementary File 1). This was supplemented by a web-based search of the grey literature, and a Google scholar search using similar terms, including a directed search of relevant key organisations websites. Cited references were examined by browsing the reference lists of studies to identify additional eligible studies.

## Eligibility criteria and selection of sources of evidence

Table 1 outlines the inclusion and exclusion criteria and the sources of evidence. The results from the searches were screened in an iterative process by two authors (NN and AKA). First, the sources were screened based on the information presented in the title and abstract. Next, full-text articles were assessed to determine their eligibility for inclusion using the criteria in Table 1. Discrepancies regarding eligibility were resolved by consensus and discussion with a third author (PA).

## Data charting and summary

The included literature was reviewed using a data extraction form developed through an iterative process to identify the data elements critical to answering the review question and objectives. The form was piloted with 10% of the included studies to ensure consistency and revised, as necessary.

The extracted data included authors, year of publication, geographical setting, study design, target population(s), type and description of intervention, duration of implementation, reported outcomes, and any facilitators or barriers.

The first author (NN) charted the data, and the second author (AKA) reviewed the data. Any disagreements between the reviewers were resolved by a consensus involving the third author

1  
2  
3 (PA) whenever necessary. In line with the scoping review methodology, a formal assessment  
4 of the methodological quality of the included studies was not undertaken, as the intention was  
5 to provide a broad overview of the existing literature related to the review question<sup>21</sup>. Data  
6 extracted across the included sources of evidence was summarised using figures, tables, and  
7 summaries.  
8  
9

10  
11  
12 To map and summarize the evidence, we used an integrated model developed from the World  
13 Health Organisation (WHO) recommended interventions for maternal and newborn  
14 health<sup>4,18,20</sup>, the continuum of care approach for maternal health<sup>19</sup> and the social determinants  
15 of health framework<sup>17,23</sup> (Figure 1). The model combines WHO's consensus  
16 recommendations of both clinical and non-clinical interventions for maternal and newborn  
17 health as outlined in the guidelines issued in 2011 and 2017 and presents these interventions  
18 across the continuum of care for maternal, newborn and child health. We assessed whether  
19 interventions described in the included studies were in line with any of the WHO  
20 recommended interventions outlined in the model. The model also adapts the social  
21 determinants of health framework to highlight interventions aimed at addressing structural  
22 factors (such as those related to the distribution of wealth and power) and intermediary  
23 factors (such as the ability of women to access health services) which influence maternal  
24 health.  
25  
26  
27  
28  
29  
30  
31  
32  
33  
34

### 35 **Patient and public involvement**

36  
37  
38 Patients and public were not involved in the design, conduct or reporting of this study.  
39

### 40 **Ethics approval statement**

41  
42  
43 Due to the nature of the study (scoping review), the study did not involve human participants.  
44  
45  
46  
47  
48  
49  
50  
51  
52  
53  
54  
55  
56  
57  
58  
59  
60



**Table 1: Inclusion and Exclusion criteria**

| Criteria               | Inclusion                                                                                                        | Exclusion                                                                                                                                                                     |
|------------------------|------------------------------------------------------------------------------------------------------------------|-------------------------------------------------------------------------------------------------------------------------------------------------------------------------------|
| <b>Type of studies</b> | Any existing literature including journal articles, systematic reviews, grey literature, and evaluation reports. | conference proceedings, study protocols, editorials, cost effectiveness studies, modelling studies or commentaries on MNH interventions.                                      |
| <b>Setting</b>         | Nigeria; International/multi-country studies including Nigeria.                                                  | studies with topics not reporting on MNH interventions in Nigeria.                                                                                                            |
| <b>Time period</b>     | No time limits set                                                                                               |                                                                                                                                                                               |
| <b>Language</b>        | Studies in English                                                                                               | Studies not in English                                                                                                                                                        |
| <b>Focus of study</b>  | Studies focused on maternal and newborn health (MNH) interventions/programs.                                     | Studies without an intervention/program for MNH or outcomes not focused on MNH, Studies where intervention/program focused only on child health and did not include newborns. |

## Results

### Overview of the literature search

The systematic literature search resulted in 827 publications after removing duplicates. A total of 79 full texts were assessed, of which 52 were included in the review. An additional 28 articles were retrieved from citations, and the full texts were assessed and included in the review. A total of 80 publications were included in the final review<sup>24–103</sup>. A PRISMA flow diagram in Figure 2 summarises the search results and screening processes for this study.

### Characteristics of included literature.

The characteristics of the included sources of evidence are summarised in Table 2, and the details of each publication are presented in Supplementary file 2: Table S2. Figure 3 shows the results of mapping the studies to the integrated framework developed in this study. The results are summarized below:

### ***Intervention and programs along the continuum of care for maternal and newborn health.***

Half (n=40) of the interventions targeted pregnancy, childbirth, or both. Only four interventions targeted the pre-pregnancy stage and involved family planning or contraception services<sup>46,50-52</sup>. Nine interventions focused on the postpartum period for mothers, newborns, or both, and involved postpartum family planning<sup>44,79</sup>, promoting early breastfeeding<sup>38,39</sup>, neonatal resuscitation<sup>34</sup>, keeping the baby warm<sup>69</sup>, immunisation<sup>73,95</sup> and a combination of essential newborn interventions<sup>43</sup>. Just over one-third (34%, n=27) of the programs spanned all stages of the continuum of care.

### ***Alignment with WHO recommendations for improving maternal and newborn health.***

Most of the publications reviewed (71%, n=57) reported interventions aligned with the recommendations outlined in Figure 2 based on the WHO 2011 and 2017 guidelines for maternal and newborn health. The remaining studies (29%, n=23) aimed to improve quality or standard of maternal and newborn health services mainly through capacity building of health providers, improving access through community health insurance schemes, providing free MNH services, emergency loans, conditional cash transfers, and outreach services. These were not specifically listed as priority interventions in 2011 and 2017 guidelines, albeit may be stated elsewhere in other WHO guidance.

### ***Mapping interventions to the social determinants of health framework for maternal health***

Nearly all interventions (93%, n=74) focused on the intermediate social determinants of health. These include health system factors such as demand, access, quality, and utilization of maternal and newborn health services (n=38), improving maternal health knowledge and behaviour (n=18), and improving the health status of mothers and newborns by addressing obstetric and/or newborn complications and diseases (n=18). Only six studies had interventions targeted at structural social determinants of health, including public policies, gender dynamics, or socio-cultural norms<sup>45,75,78,92,97,99</sup>.

### ***Types of studies, year of publication and lead author/institution.***

Of the literature included, 71 publications were journal articles, and nine were program evaluation reports. The publication year ranged from 1982 to 2020, with most sources (n=64) published between 2010 and 2018 (Figure 4). The publications included in this review employed many study types/designs. One-quarter of the reviewed studies involved a process, outcome, or impact evaluation (n=21), followed by quasi-experimental designs (n=16), pre-or

1  
2  
3 post-intervention designs (n=15), and post-intervention analysis (n=13). Nearly one-third  
4 (30%, n=24) of the reviewed studies reported having a comparison group, including eight (8)  
5 randomized control trials. Only six (6) sources used qualitative methods, and the remaining  
6 74 were quantitative, two of which used a mixed-methods design<sup>79,83</sup>. Over half (60%, n=48)  
7 of the reviewed articles had the lead author or institution based in Nigeria. Study duration  
8 varied as follows: less than a year (n=10), one year to 5 years (n=53), and greater than five  
9 years (n=13).

### 16 ***Geographical region, setting and site of intervention.***

17  
18 Based on Nigeria's six geopolitical regions, over half (51%, n=41) of the studies reported  
19 interventions in a single region, and 21 studies reported interventions across two or more  
20 regions. About a third (n=28) of the studies were conducted in the northern regions and 21  
21 studies in the southern regions. Thirteen studies (16%) involved settings in both the northern  
22 and southern regions. Six studies reported national coverage, including one study involving  
23 all 36 states of Nigeria and the Federal Capital Territory (FCT)<sup>75</sup>. Two studies reported multi-  
24 country sites, including Nigeria<sup>88,100</sup>.

25  
26 There were fewer community-based interventions or programs (39%, n=31) compared to  
27 those in health facilities (46%, n=37). The health facilities included ranged from primary care  
28 clinics to referral hospitals. A small portion (15%, n=12) of the studies reported both  
29 community and health facility program sites. More studies (47.5%, n=38) were conducted in  
30 a rural setting compared to an urban environment (34%, n=27), with approximately 19%  
31 (n=15) involving both rural and urban settings.

### 42 ***Target populations.***

43  
44 Most interventions in the literature reviewed (79%, n=63) were targeted mainly at pregnant  
45 women, mothers, and women of childbearing age, described as 15 to 49 years of age, with  
46 one specifically focused on young adolescent females<sup>42</sup>. Eleven interventions focused on  
47 health care providers, including community health workers and  
48 midwives<sup>25,34,35,58,60,87,88,91,97,100</sup>. Four interventions involved community members, including  
49 the male members of the community, husbands, or both<sup>45,89,92,99</sup>. Two interventions  
50 specifically targeted policymakers<sup>48,75</sup>.

### ***Reported outcomes, effectiveness, or impact.***

The interventions outlined in the reviewed literature sought to address a wide range of outcomes. Nearly half (45%, n=33) had outcomes related to improving the demand, access, coverage, quality, and utilisation of essential maternal and newborn health services, interventions, or both. Other outcomes include reducing maternal or newborn deaths or both<sup>24,26,27,32,34,49,60,62,64,67-69,72,78,102</sup>; improving knowledge of preventive practices and self-management<sup>30,38,39,50,51,55,65,71,73,74,93,95</sup>; improving community participation in maternal and newborn health including male members of the community<sup>28,45,92,99</sup>; capacity building of the health workforce<sup>44,77,79,86,88</sup>; and the prevention and management of pregnancy or newborn related diseases and complications, or both<sup>31,35,37,40,41,57,61,66,96,103</sup>.

### ***Reported barriers and facilitators.***

Not all included studies reported facilitators and/or barriers of implementing the interventions. Forty-six studies (n=46) reported factors that facilitate or positively influence the intervention or program. The most common facilitators reported were community engagement and participation (50%, n=23)<sup>24,25,27,28,31,39,41,42,45,51,53,54,63,65,77,85,91,92,98,100-102</sup>. Others included an integrated approach to implementation of interventions<sup>31,48,85,89,98</sup>; communication of adequate (and culturally appropriate) knowledge about the program or intervention<sup>54,65,69,103</sup> and demand creation activities<sup>52,53</sup>.

Forty-two studies (n=42) reported barriers, with funding limitations posing the main challenge to implementation reported in 11 studies<sup>25,27,33,53,78,80,82,86,91,92,94</sup>. Nine studies reported negative attitudes and perceptions regarding the intervention, the health system, or both as a barrier<sup>36,39,48,53,64,71,79,82,83</sup>.

**Table 2: General characteristics of included sources of evidence.**

| Characteristics                         | Number of studies (%),<br>n=80 | References                                                                                    |
|-----------------------------------------|--------------------------------|-----------------------------------------------------------------------------------------------|
| <b>Study Design</b>                     |                                |                                                                                               |
| Systematic Review                       | 1 (1.25)                       | 49                                                                                            |
| RCT                                     | 8 (10)                         | 26,38,80,82,84,95,96,103                                                                      |
| Quasi-experimental                      | 16 (20)                        | 36,50,54,63–65,72,74–76,81,89,97,101,102                                                      |
| Cohort/longitudinal                     | 6 (7.5)                        | 37,51,53,57,61,69                                                                             |
| Post-intervention/program evaluation    | 13 (16.25)                     | 25,28,32–34,43,52,60,83,88,91,94,98                                                           |
| Pre-post/before after studies           | 15 (18.75)                     | 24,39,40,55,56,59,62,66,67,71,73,79,87,92,93                                                  |
| Process/outcome/impact evaluation       | 21 (26.25)                     | 27,30,31,35,41,42,44–46,48,58,68,70,77,78,85,86,90,99,100                                     |
| <b>Type of study</b>                    |                                |                                                                                               |
| Qualitative                             | 7 (8.75)                       | 25,28,48,85,91,92,94                                                                          |
| Quantitative                            | 71 (88.75)                     | 24,26,27,29–31,34–46,49–78,80–82,84,86–90,93,95–103                                           |
| Mixed Methods                           | 2 (2.5)                        | 79,83                                                                                         |
| <b>Control or Comparison group/unit</b> |                                |                                                                                               |
| Yes                                     | 24(30)                         | 26,29–31,36–40,61,76,80–82,84,85,87,89,95–97,101–103                                          |
| No                                      | 56(70)                         | 24,25,27,28,32–35,41–60,62–75,77–79,83,86,88,90–94,98–100                                     |
| <b>Setting</b>                          |                                |                                                                                               |
| rural                                   | 38(47.5)                       | 26,27,31,33,38,39,42–46,50,53,55,57,60,61,63,71,73,74,76–78,81,85,87,89,90,92,93,96,97,99–103 |
| urban                                   | 27(33.75)                      | 25,32,34–37,40,51,52,56,58,62,65–68,79,80,82,84,86,88,91,94,95,98                             |
| rural and urban                         | 15(18.75)                      | 24,28–30,41,47–49,54,59,64,69,70,75,83                                                        |
| <b>Site of Intervention</b>             |                                |                                                                                               |
| Community                               | 31(38.75)                      | 26,28–31,33,38,39,42,45,50,51,53,55,57,63,65,71,73–75,81,85,87,90,92,95,99–101                |
| Health facility                         | 37(46.25)                      | 25,27,32,34–37,40,41,43,44,46,52,54,56,58–62,64,66–68,70,72,78–80,82–84,86,88,92,94,96,103    |
| Community and health facility           | 12(15)                         | 24,47–49,69,77,89,91,93,97,98,102                                                             |
| <b>Geographical Region</b>              |                                |                                                                                               |
| North West                              | 22(27.5)                       | 24,25,28,30,31,33,36,38,47,48,64,65,70,71,78,85,91–93,97,103                                  |
| North Central                           | 5(6.25)                        | 37,56,84,89,94                                                                                |
| North East                              | 3(3.75)                        | 27,50,58                                                                                      |
| South West                              | 8(10)                          | 26,39,40,66,74,80,95,96                                                                       |
| South East                              | 4(5)                           | 32,57,60,68                                                                                   |
| South South                             | 9(11.25)                       | 55,61,63,73,82,83,98,99,101                                                                   |
| Multiple: Northern regions              | 8(10)                          | 29,42,45,46,54,76,79,102                                                                      |
| Multiple: North and South regions       | 9(11.25)                       | 35,43,44,51,53,62,77,86,90                                                                    |
| Country-wide: all geographic regions    | 10(12.5)                       | 34,41,49,52,59,67,69,75,81,87                                                                 |
| Multi-country: Nigeria included         | 2(2.5)                         | 88,100                                                                                        |
| <b>Lead author/Institution base</b>     |                                |                                                                                               |
| Nigeria                                 | 48(60)                         | 25,27,30–32,34,37,39,40,42–47,49,50,53,54,57–60,62–64,66–68,70,71,73–75,78,81,83,85,91–99     |
| International                           | 32(40)                         | 24,26,28,29,33,35,38,41,48,51,52,55,69,72,76,77,79,80,82,84,86–90,100,102,103                 |

## Discussion

It is promising to see increasing research on maternal and neonatal health programs in Nigeria. Following a systematic search of literature on existing interventions and programs in Nigeria, this study used a novel framework to identify gaps for research and action on MNH interventions and programs in Nigeria. We developed an integrated model combining the WHO recommendations for maternal and newborn health with the continuum of care and the social determinants of health frameworks. This approach can provide researchers and policy makers a rigorous method to examine and assess gaps in MNH interventions and service delivery and identify country-specific priorities to focus attention.

Our findings show that the interventions in a large majority of studies in this review (71%), aligned with the WHO recommendations for maternal and newborn health. Most interventions targeted the pregnancy and childbirth stages of the continuum of care. This is likely related to evidence showing that the critical causes of maternal and newborn deaths occur during these periods<sup>7,104</sup>. Only a few studies focused on the pre-pregnancy stage and the provision of family planning services. This area requires further attention, as studies have shown that providing reproductive health services, mainly contraceptive services, can help with further reductions in maternal and newborn mortality<sup>7,17,104</sup>.

Accordingly, most studies examined the intermediate social determinants of health, such as access to and availability of relevant health services within health facilities, with only a few investigating programmes aimed at the more structural social determinants of health, such as gender, cultural and religious norms, and public policies. Although these proximal social determinants remain essential, growing evidence emphasises the significant role of distal determinants influencing maternal health and its outcomes<sup>17,104</sup>. Furthermore, increasing evidence suggests actions to improve these distal social determinants can improve maternal and newborn health outcomes<sup>17</sup>. This highlights the need for further research on how social interventions affect maternal and neonatal health outcomes in Nigeria to inform program development and implementation.

Of the 80 publications reviewed, over 80% reported achieving the interventions' intended outcomes. Many of the programs investigated interventions related to WHO recommendations, with a focus on women and their engagement with health facilities. Our review also highlights the focus of existing programs on measuring coverage of evidence-based MNH interventions in health facilities, with limited attention to community-based

1  
2  
3 interventions. Importantly, the research synthesised does not clearly show whether these  
4 interventions were chosen to align with country-level priorities. Consequently, to accelerate  
5 progress towards the SDG goals of ending preventable maternal and newborn deaths, a  
6 broader lens to identify and measure critical and context-specific factors beyond the health  
7 facility is required. Country level researchers may be better posed to understand and highlight  
8 country-level priorities for MNH research. Of note, international collaborators led over a  
9 third of the research in this review. Going forward, we implore global health institutions to  
10 actively improve local research capacity and funding as articulated by the African Academy  
11 of Science<sup>105,106</sup>.

12  
13  
14  
15  
16  
17  
18  
19  
20  
21  
22  
23  
24  
25  
26  
27  
28  
29  
30  
31  
32  
33  
34  
35  
36  
37  
38  
39  
40  
41  
42  
43  
44  
45  
46  
47  
48  
49  
50  
51  
52  
53  
54  
55  
56  
57  
58  
59  
60  
Factors that facilitated achieving intended outcomes involved engagement with the  
communities and integration of multiple interventions. This result supports the call for the  
application of integrated packages of effective health interventions across the continuum of  
care, re-emphasized by the strategic plans to achieve SDG 3<sup>19,104</sup>. In addition, these findings  
highlight the role of participatory mechanisms to engage families (including men) and  
communities in improving maternal and newborn health<sup>17</sup>. Two key barriers to interventions  
achieving their intended health outcomes were funding limitations and negative attitudes and  
perceptions. This may be related to the need for public engagement to address participants'  
critical concerns and the need for more integrated interventions.

The search strategy was limited to PubMed, Embase and Scopus databases; thus, publications  
in excluded databases might be missing in this review. Nevertheless, we conducted a grey  
literature search alongside these databases to cover other relevant resources. Although we  
carefully considered the search terms used in our strategy, we recognize that there may be  
publication bias, as not all interventions/programs for maternal and newborn health will have  
been published.

A broad range of study designs were employed in the studies included in this review.  
However, most employed quantitative approaches with only a small fraction using qualitative  
and mixed methods approaches. Given the nature of MNH interventions and the complexity  
of the challenges facing women and newborns, multidisciplinary research and mixed methods  
approaches are needed to add depth to understanding the contextual nuances of maternal and  
newborn health. This helps to uncover unknown and emerging factors which potentially  
informs better use of limited resources. An important domain to consider within the spectrum

1  
2  
3 of factors that can influence maternal and newborn health outcomes is the quality of services  
4 received by women and children<sup>107</sup>, especially if they suffer mistreatment<sup>108,109</sup>.

## 7 **Conclusion**

9  
10 Using a novel framework combining WHO recommendations for maternal and newborn  
11 health, the continuum of care and the social determinants of health frameworks, most MNH  
12 interventions were aligned with the WHO recommendations and focused on the proximal  
13 social determinants of health. These were related largely to health system factors within  
14 health facilities. In addition, our findings show only a few programs targeting the structural  
15 social determinants of maternal health such as religious and cultural barriers and MNH  
16 policies and highlights the relative neglect of non-facility-based interventions. The evidence  
17 evaluating MNH outcomes was mostly quantitative and with only a few benefiting from  
18 qualitative and mixed methods approaches, thus limiting the exploration of contextual factors  
19 that influence maternal and newborn health outcomes. Therefore, efforts to improve maternal  
20 and newborn health in Nigeria and other similar contexts may need to focus greater attention  
21 on implementing MNH interventions and measuring context-specific challenges beyond the  
22 health facility. This may help to accelerate progress towards the SDG goal of ending  
23 preventable maternal and newborn deaths.  
24  
25  
26  
27  
28  
29  
30  
31  
32  
33  
34  
35  
36

37 Figure 1: Integrated framework of the WHO recommendations, continuum of care approach  
38 and social determinants of maternal health.

39  
40 Figure 2: Flow chart of the selection process of sources of evidence.

41  
42 Figure 3: Mapping of interventions to the WHO recommendations, continuum of care  
43 approach and social determinants of health.  
44  
45

46  
47 Figure 4: Number of publications per year.  
48  
49

## 50 **Contributorship statement:**

51  
52 The conception and design of the research was by NN, AKA and PA. Data collection and  
53 analysis and interpretation of results were conducted by NN, AKA and PA. The first draft of  
54 the manuscript was written by NN, and all authors contributed to subsequent revisions. All  
55 authors read and approved the final manuscript.  
56  
57  
58  
59  
60



1  
2  
3 **Competing interests:** The authors declare that they have no competing interests.  
4  
5

6 **Funding:** This research received no specific grant from any funding agency in the public,  
7 commercial or not-for-profit sectors.  
8  
9

10  
11 **Data availability statement:** No additional data available.  
12  
13

## 14 15 16 17 **References**

- 18  
19 1. United Nations Inter-agency Group for Child Mortality Estimation (UN IGME).  
20 Levels and trends in child mortality 2018 Report: estimates developed by the UN  
21 Inter-agency group for Child mortality estimation. New York; 2018.  
22  
23
- 24  
25 2. World Health Organization (WHO). Trends in maternal mortality: 1990 to 2015.  
26 Estimates by WHO, UNICEF, UNFPA, World Bank Group and the United Nations  
27 Population Division. [Internet]. WHO. World Health Organization; 2015 [cited 2019  
28 Aug 9]. Available from:  
29 [https://apps.who.int/iris/bitstream/handle/10665/193994/WHO\\_RHR\\_15.23\\_eng.pdf?sequence=1](https://apps.who.int/iris/bitstream/handle/10665/193994/WHO_RHR_15.23_eng.pdf?sequence=1)  
30  
31
- 32  
33 3. World Health Organization (WHO). Maternal health in Nigeria: generating  
34 information for action [Internet]. WHO. World Health Organization; 2019 [cited 2020  
35 Nov 22]. Available from: <http://www.who.int/reproductivehealth/maternal-health-nigeria/en/>  
36  
37
- 38  
39 4. The Partnership for Maternal Newborn and Child Health. Essential Interventions,  
40 Commodities and Guidelines for Reproductive, Maternal, Newborn and Child Health  
41 [Internet]. Geneva, Switzerland; 2011 [cited 2020 May 4]. Available from:  
42 [http://www.who.int/pmnch/topics/part\\_publications/essential\\_interventions\\_18\\_01\\_2012.pdf](http://www.who.int/pmnch/topics/part_publications/essential_interventions_18_01_2012.pdf)  
43  
44
- 45  
46 5. United Nations. MDG Report 2015. In: Disease Control Priorities, Third Edition  
47 (Volume 2): Reproductive, Maternal, Newborn, and Child Health [Internet]. The  
48 World Bank; 2016 [cited 2020 May 11]. p. 1–23. Available from:  
49 [https://elibrary.worldbank.org/doi/full/10.1596/978-1-4648-0348-2\\_ch1](https://elibrary.worldbank.org/doi/full/10.1596/978-1-4648-0348-2_ch1)  
50  
51  
52  
53  
54  
55  
56  
57  
58  
59  
60

- 1  
2  
3 6. Burchett HE, Mayhew SH. Maternal mortality in low-income countries: What  
4 interventions have been evaluated and how should the evidence base be developed  
5 further? *Int J Gynecol Obstet*. 2009;105(1):78–81.  
6  
7
- 8  
9 7. Black RE, Levin C, Walker N, Chou D, Liu L, Temmerman M, et al. Reproductive ,  
10 maternal , newborn , and child health : key messages from Disease Control Priorities  
11 3rd Edition. *Lancet* [Internet]. 2015;388(10061):2811–24. Available from:  
12 [http://dx.doi.org/10.1016/S0140-6736\(16\)00738-8](http://dx.doi.org/10.1016/S0140-6736(16)00738-8)  
13  
14
- 15  
16 8. Izugbara CO, Wekesah FM, Adedini SA. *Maternal Health in Nigeria: A Situation*  
17 *Update*. Nairobi, Kenya; 2016.  
18  
19
- 20  
21 9. Marchant T, Boerma T, Diaz T, Huicho L, Kyobutungi C, Mershon CH, et al.  
22 *Measurement and accountability for maternal, newborn and child health: Fit for 2030*.  
23 *BMJ Glob Heal* [Internet]. 2020 Jul 5 [cited 2021 Apr 26];5(7):2697. Available from:  
24 <https://www>.  
25  
26
- 27  
28 10. Grove J, Claeson M, Bryce J, Amouzou A, Boerma T, Waiswa P, et al. Maternal,  
29 newborn, and child health and the Sustainable Development Goals - A call for  
30 sustained and improved measurement [Internet]. Vol. 386, *The Lancet*. Lancet  
31 Publishing Group; 2015 [cited 2021 Apr 26]. p. 1511–4. Available from:  
32 <http://gaviprogressreport.org/2014/>  
33  
34
- 35  
36 11. Maternal Health Taskforce. Who decides what matters in maternal and newborn health  
37 measurement? [Internet]. 2021 [cited 2021 Apr 26]. Available from:  
38 [https://www.mhtf.org/2021/02/24/who-decides-what-matters-in-maternal-and-](https://www.mhtf.org/2021/02/24/who-decides-what-matters-in-maternal-and-newborn-health-measurement/)  
39 [newborn-health-measurement/](https://www.mhtf.org/2021/02/24/who-decides-what-matters-in-maternal-and-newborn-health-measurement/)  
40  
41  
42  
43
- 44  
45 12. Ezeh OK, Agho KE, Dibley MJ, Hall J, Page AN. Determinants of neonatal mortality  
46 in Nigeria: Evidence from the 2008 demographic and health survey. *BMC Public*  
47 *Health*. 2014 May 29;14(1).  
48  
49
- 50  
51 13. Ujah IAO, Aisien OA, Mutahir JT, Vanderjagt DJ, Glew RH, Uguru VE. Factors  
52 Contributing to Maternal Mortality in North-Central Nigeria: A Seventeen-Year. *Afr J*  
53 *Reprod Health*. 2005;9(3):27–40.  
54  
55
- 56  
57 14. Lassi ZS, Mansoor T, Salam RA, Das JK, Bhutta ZA. Essential pre-pregnancy and  
58 pregnancy interventions for improved maternal, newborn and child health. *Reprod*  
59  
60

- 1  
2  
3 Health [Internet]. 2014 [cited 2020 May 5];11. Available from:  
4 <http://www.reproductive-health-journal.com/content/11/S1/S2>  
5  
6  
7  
8 15. Lassi ZS, Middleton PF, Crowther C, Bhutta ZA. Interventions to Improve Neonatal  
9 Health and Later Survival: An Overview of Systematic Reviews. *EBioMedicine*. 2015  
10 Aug 1;2(8):985–1000.  
11  
12  
13 16. Salam RA, Mansoor T, Mallick D, Lassi ZS, Das JK, Bhutta ZA. Essential childbirth  
14 and postnatal interventions for improved maternal and neonatal health. *Reprod Health*  
15 [Internet]. 2014 [cited 2020 May 5];11. Available from: [http://www.reproductive-](http://www.reproductive-health-journal.com/content/11/S1/S3)  
16 [health-journal.com/content/11/S1/S3](http://www.reproductive-health-journal.com/content/11/S1/S3)  
17  
18  
19  
20  
21 17. UNDP. Discussion Paper: A social determinants approach to maternal health. Roles  
22 for development actors. 2011.  
23  
24  
25 18. World Health Organization (WHO). WHO recommendations on newborn health:  
26 guidelines approved by the WHO Guidelines Review Committee [Internet]. Geneva;  
27 2017 [cited 2020 May 4]. (Licence: CC BY-NC-SA 3.0 IGO.). Report No.:  
28 (WHO/MCA/17.10). Available from:  
29 [https://www.who.int/maternal\\_child\\_adolescent/documents/newborn-health-](https://www.who.int/maternal_child_adolescent/documents/newborn-health-recommendations/en/)  
30 [recommendations/en/](https://www.who.int/maternal_child_adolescent/documents/newborn-health-recommendations/en/)  
31  
32  
33  
34  
35  
36 19. Kerber KJ, de Graft-Johnson JE, Bhutta ZA, Okong P, Starrs A, Lawn JE. Continuum  
37 of care for maternal, newborn, and child health: from slogan to service delivery  
38 [Internet]. Vol. 370, *Lancet*. 2007 [cited 2019 Mar 29]. p. 1358–69. Available from:  
39 [www.thelancet.com](http://www.thelancet.com)  
40  
41  
42  
43 20. World Health Organization (WHO). WHO Recommendations on maternal health.  
44 Guidelines approved by the WHO guidelines review committee. 2017.  
45  
46  
47 21. Peters M, Godfrey C, McInerney P, Munn Z, Tricco AC, Khalil H. JBI Manual for  
48 Evidence Synthesis. In: Aromataris E, Munn Z, editors. *JBI Manual for Evidence*  
49 *Synthesis* [Internet]. The Joanna Briggs Institute JBI; 2020. p. 487. Available from:  
50 <https://synthesismanual.jbi.global>  
51  
52  
53  
54  
55 22. Intervention MICA: Building Healthy Communities. What is an Intervention?  
56 [Internet]. 2017 [cited 2021 Apr 6]. Available from:  
57 <https://health.mo.gov/data/interventionmica/>  
58  
59  
60

- 1  
2  
3 23. Hamal M, Dieleman M, De Brouwere V, De Cock Buning T. Social determinants of  
4 maternal health: A scoping review of factors influencing maternal mortality and  
5 maternal health service use in India. *Public Health Rev* [Internet]. 2020 Jun 2 [cited  
6 2020 Sep 16];41(1):13. Available from:  
7  
8 <https://publichealthreviews.biomedcentral.com/articles/10.1186/s40985-020-00125-6>  
9  
10  
11
- 12 24. Sloan NL, Storey A, Fasawe O, Yakubu J, McCrystal K, Wiwa O, et al. Advancing  
13 Survival in Nigeria: A Pre-post Evaluation of an Integrated Maternal and Neonatal  
14 Health Program. *Matern Child Health J* [Internet]. 2018 Jul [cited 2020 Jun  
15 10];22(7):986–97. Available from: <https://doi.org/10.1007/s10995-018-2476-3>  
16  
17  
18
- 19 25. Oguntunde O, Surajo IM, Dauda DS, Salihu A, Anas-Kolo S, Sinai I, et al.  
20 Overcoming barriers to access and utilization of maternal, newborn and child health  
21 services in northern Nigeria: an evaluation of facility health committees. *BMC Health*  
22 *Serv Res* [Internet]. 2018 Feb 9 [cited 2020 Jun 16];18(1):104. Available from:  
23 <https://bmchealthservres.biomedcentral.com/articles/10.1186/s12913-018-2902-7>  
24  
25  
26
- 27 26. Alexander DA, Northcross A, Karrison T, Morhasson-Bello O, Wilson N, Atalabi OM,  
28 et al. Pregnancy outcomes and ethanol cook stove intervention: A randomized-  
29 controlled trial in Ibadan, Nigeria. *Environ Int*. 2018 Feb 1;111:152–63.  
30  
31  
32
- 33 27. Abegunde D, Orobato N, Sadauki H, Bassi A, Kabo IA, Abdulkarim M, et al.  
34 Countdown to 2015: Tracking maternal and child health intervention targets using Lot  
35 Quality Assurance Sampling in Bauchi State Nigeria. *PLoS One* [Internet]. 2015 [cited  
36 2020 Jun 9];10(6):e0129129. Available from:  
37 [http://www.plosone.org/article/fetchObject.action?uri=info:doi/10.1371/journal.pone.0](http://www.plosone.org/article/fetchObject.action?uri=info:doi/10.1371/journal.pone.0129129&representation=PDF)  
38 [129129&representation=PDF](http://www.plosone.org/article/fetchObject.action?uri=info:doi/10.1371/journal.pone.0129129&representation=PDF)  
39  
40  
41  
42  
43  
44
- 45 28. Cannon M, Charyeva Z, Oguntunde O, Sambisa W, Shoretire K, Orobato N, et al. A  
46 case study of community-based distribution and use of Misoprostol and Chlorhexidine  
47 in Sokoto State, Nigeria. *Glob Public Health* [Internet]. 2017 Dec;12(12):1553–67.  
48 Available from: <http://www.tandf.co.uk/journals/titles/17441692.asp>  
49  
50  
51  
52
- 53 29. Findley SE, Uwemedimo OT, Doctor H V, Green C, Adamu F, Afenyadu GY. Early  
54 results of an integrated maternal, newborn, and child health program, Northern  
55 Nigeria, 2009 to 2011. *BMC Public Health*. 2013 Oct 31;13(1):1034.  
56  
57  
58
- 59 30. Ishola G, Fayehun F, Isiugo-Abanihe U, Segun T, Yusuf S, Orji B, et al. Effect of  
60

- 1  
2  
3 Volunteer Household Counseling in Improving Knowledge of Birth Preparedness and  
4 Complication Readiness of Pregnant Women in Northwest Nigeria. *Afr J Reprod*  
5 *Health*. 2017 Mar;21(1):39–48.  
6  
7  
8  
9 31. Orobato N, Austin AM, Abegunde D, Ibrahim M, Mohammed Z, Abdul-Azeez J, et  
10 al. Scaling-up the use of sulfadoxine-pyrimethamine for the preventive treatment of  
11 malaria in pregnancy: results and lessons on scalability, costs and programme impact  
12 from three local government areas in Sokoto State, Nigeria. *Malar J* [Internet]. 2016  
13 Nov [cited 2020 Jun 10];15(1):1–24. Available from:  
14 <http://www.malariajournal.com/home/>  
15  
16  
17 32. Ezugwu EC, Agu PU, Nwoke MO, Ezugwu FO. Reducing maternal deaths in a low  
18 resource setting in Nigeria. *Niger J Clin Pract* [Internet]. 2014 Jan [cited 2020 Jun  
19 10];17(1):62–6. Available from:  
20 <http://www.njcponline.com/text.asp?2014/17/1/62/122842>  
21  
22  
23 33. Orobato N, Abegunde D, Shoretire K, Abdulazeez J, Fapohunda B, Lamiri G, et al. A  
24 report of at-scale distribution of chlorhexidine digluconate 7.1% gel for newborn cord  
25 care to 36,404 newborns in Sokoto State, Nigeria: Initial lessons learned. *PLoS One*  
26 [Internet]. 2015 [cited 2020 Jun 10];10(7):e0134040. Available from:  
27 [http://www.plosone.org/article/fetchObject.action?uri=info:doi/10.1371/journal.pone.0](http://www.plosone.org/article/fetchObject.action?uri=info:doi/10.1371/journal.pone.0134040&representation=PDF)  
28 [134040&representation=PDF](http://www.plosone.org/article/fetchObject.action?uri=info:doi/10.1371/journal.pone.0134040&representation=PDF)  
29  
30  
31 34. Disu EA, Ferguson IC, Njokanma OF, Anga LA, Solarin AU, Olutekunbi AO, et al.  
32 National neonatal resuscitation training program in Nigeria (2008-2012): a preliminary  
33 report. *Niger J Clin Pract*. 2015 Jan 1;18(1):102–9.  
34  
35  
36 35. Kwast BE. Reduction of maternal and perinatal mortality in rural and peri-urban  
37 settings: what works? *Eur J Obstet Gynecol Reprod Biol* [Internet]. 1996;69(1):47–53.  
38 Available from: <http://www.elsevier.com/locate/ejogrb>  
39  
40  
41 36. Eluwa GI, Adebajo SB, Torpey K, Shittu O, Abdu-Aguye S, Pearlman D, et al. The  
42 effects of centering pregnancy on maternal and fetal outcomes in northern Nigeria; a  
43 prospective cohort analysis. *BMC Pregnancy Childbirth* [Internet]. 2018 May 11 [cited  
44 2020 Jun 10];18(1):158. Available from: <https://doi.org/10.1186/s12884-018-1805-2>  
45  
46  
47 37. Sam-Agudu NA, Ramadhani HO, Isah C, Erekaha S, Fan-Osuala C, Anaba U, et al.  
48 The Impact of Structured Mentor Mother Programs on Presentation for Early Infant  
49  
50  
51  
52  
53  
54  
55  
56  
57  
58  
59  
60

- 1  
2  
3 Diagnosis Testing in Rural North-Central Nigeria: A Prospective Paired Cohort Study.  
4 J Acquir Immune Defic Syndr. 2017 Jun;75 Suppl 2:S182–9.  
5  
6  
7  
8 38. Qureshi AM, Oche OM, Sadiq UA, Kabiru S. Using community volunteers to promote  
9 exclusive breastfeeding in Sokoto State, Nigeria. Pan Afr Med J. 2011;10(8):8.  
10  
11 39. Davies-Adetugbo AA, Adebawa HA. The Ife South Breastfeeding project: Training  
12 community health extension workers to promote and manage breastfeeding in rural  
13 communities. Bull World Health Organ. 1997;75(4):323–32.  
14  
15 40. Ojofeitimi EO, Elegbe I, Babafemi J. Diet Restriction by pregnant women in Nigeria.  
16 Int J Gynecol Obstet. 1982 Apr;20(2):99–103.  
17  
18 41. Danmusa S, Coeytaux F, Potts J, Wells E. Expanding Use of Magnesium Sulfate for  
19 Treatment of Pre-eclampsia and Eclampsia Building Towards Scale in Nigeria  
20 [Internet]. 2014 [cited 2020 Jun 9]. Available from:  
21 <https://www.macfound.org/media/files/MagSulfateFINAL.pdf>  
22  
23 42. Maternal Newborn and Child Health Program (MNCH2). Case study No.4: Providing  
24 hard-to-reach communities in northern Nigeria with RMNCH services [Internet]. 2017  
25 [cited 2020 Jun 9]. Available from: [https://www.mnch2.com/wp-](https://www.mnch2.com/wp-content/uploads/2017/03/4-FINAL-SCREEN_Case_Study_Outreach_MNCH2_2017.pdf)  
26 [content/uploads/2017/03/4-FINAL-](https://www.mnch2.com/wp-content/uploads/2017/03/4-FINAL-SCREEN_Case_Study_Outreach_MNCH2_2017.pdf)  
27 [SCREEN\\_Case\\_Study\\_Outreach\\_MNCH2\\_2017.pdf](https://www.mnch2.com/wp-content/uploads/2017/03/4-FINAL-SCREEN_Case_Study_Outreach_MNCH2_2017.pdf)  
28  
29 43. USAID/Maternal and Child Survival Program. Strengthening Newborn Care: Kogi and  
30 Ebonyi states, Nigeria [Internet]. 2018. Available from: <https://www.mcsprogram.org/>  
31  
32 44. Maternal and Child Survival Program (MCSP). Increasing Family Planning Uptake  
33 Among Postpartum Women [Internet]. 2018. Available from:  
34 <https://www.mcsprogram.org/>  
35  
36 45. Maternal Newborn and Child Health Program (MNCH2). Case study No. 6: Male  
37 Motivators in Communities: Uniting Men on the Importance of Women’s Health  
38 [Internet]. 2017 [cited 2020 Jun 9]. Available from: <http://resources.jhpiego.org/>  
39  
40 46. Maternal Newborn and Child Health Program (MNCH2). Case study No. 7: Increasing  
41 the Uptake of Long Acting Reversible Contraception Services in Primary Health  
42 Centres through Competency-based Training The [Internet]. 2016 [cited 2020 Jun 9].  
43 Available from: <http://resources.jhpiego.org/>  
44  
45  
46  
47  
48  
49  
50  
51  
52  
53  
54  
55  
56  
57  
58  
59  
60

- 1  
2  
3  
4  
5  
6  
7  
8  
9  
10  
11  
12  
13  
14  
15  
16  
17  
18  
19  
20  
21  
22  
23  
24  
25  
26  
27  
28  
29  
30  
31  
32  
33  
34  
35  
36  
37  
38  
39  
40  
41  
42  
43  
44  
45  
46  
47  
48  
49  
50  
51  
52  
53  
54  
55  
56  
57  
58  
59  
60
47. Abegunde D, Orobato N, Shoretire K, Ibrahim M, Mohammed Z, Abdulazeez J, et al. Monitoring maternal, newborn, and child health interventions using lot quality assurance sampling in Sokoto State of northern Nigeria. *Glob Health Action*. 2015;8(1):27526.
  48. Mckaig C, Charurat E, Sasser E, Yusuf S, Ishola G, Otolorin E. An Assessment of Integration of Family Planning and Maternal, Newborn and Child Health in Kano, Nigeria [Internet]. Maryland; 2009 [cited 2020 Jun 9]. Available from: [www.jhpiego.org](http://www.jhpiego.org)
  49. Kana MA, Doctor HV, Peleteiro B, Lunet N, Barros H, M.A. K, et al. Maternal and child health interventions in Nigeria: a systematic review of published studies from 1990 to 2014. *BMC Public Health* [Internet]. 2015 Apr [cited 2020 Jun 10];15(334):334. Available from: <https://www.ncbi.nlm.nih.gov/pmc/articles/PMC4429684/#MOESM1>
  50. Abdul-Hadi RA, Abass MM, Aiyenigba BO, Oseni LO, Odafe S, Chabikuli ON, et al. The effectiveness of community based distribution of injectable contraceptives using community health extension workers in Gombe State, Northern Nigeria. *Afr J Reprod Health*. 2013;17(2):80–8.
  51. Speizer IS, Corroon M, Calhoun L, Lance P, Montana L, Nanda P, et al. Demand generation activities and modern contraceptive use in urban areas of four countries: A longitudinal evaluation. *Glob Heal Sci Pract* [Internet]. 2014 Dec 1 [cited 2020 Jul 1];2(4):410–26. Available from: [/pmc/articles/PMC4307858/?report=abstract](https://pubmed.ncbi.nlm.nih.gov/pmc/articles/PMC4307858/?report=abstract)
  52. Hotchkiss DR, Godha D, Do M. Effect of an expansion in private sector provision of contraceptive supplies on horizontal inequity in modern contraceptive use: Evidence from Africa and Asia. *Int J Equity Health* [Internet]. 2011 [cited 2020 Jul 1];10:33. Available from: [/pmc/articles/PMC3171310/?report=abstract](https://pubmed.ncbi.nlm.nih.gov/pmc/articles/PMC3171310/?report=abstract)
  53. Fayemi M, Momoh G, Oduola O, Delano G, Ladipo O, Adebola O. Community based distribution agents' approach to provision of family planning information and services in five Nigerian states: A mirage or a reality? *African J Prim Heal Care Fam Med* [Internet]. 2011 [cited 2020 Jul 1];3(1). Available from: [/pmc/articles/PMC4565418/?report=abstract](https://pubmed.ncbi.nlm.nih.gov/pmc/articles/PMC4565418/?report=abstract)
  54. Ogu R, Okonofua F, Hammed A, Okpokunu E, Mairiga A, Bako A, et al. Outcome of

- 1  
2  
3 an intervention to improve the quality of private sector provision of postabortion care  
4 in northern Nigeria. *Int J Gynecol Obstet*. 2012;118(SUPPL. 2):2–7.  
5  
6  
7  
8 55. Mens PF, Scheelbeek PF, Al Atabbi H, Enato EF. Peer education: The effects on  
9 knowledge of pregnancy related malaria and preventive practices in women of  
10 reproductive age in Edo State, Nigeria. *BMC Public Health* [Internet]. 2011 [cited  
11 2020 Jul 1];11:610. Available from: /pmc/articles/PMC3162527/?report=abstract  
12  
13  
14  
15 56. McNabb M, Chukwu E, Ojo O, Shekhar N, Gill CJ, Salami H, et al. Assessment of the  
16 quality of antenatal care services provided by health workers using a mobile phone  
17 decision support application in northern Nigeria: A pre/post-intervention study. *PLoS*  
18 *One* [Internet]. 2015 May 5 [cited 2020 Jul 2];10(5). Available from:  
19 /pmc/articles/PMC4420494/?report=abstract  
20  
21  
22  
23  
24 57. Anyaehie U, Nwagha U, Aniebue P, Nwagha T. The effect of free distribution of  
25 insecticide-treated nets on asymptomatic Plasmodium parasitemia in pregnant and  
26 nursing mothers in a rural Nigerian community. *Niger J Clin Pract* [Internet]. 2011 Jan  
27 [cited 2020 Jul 2];14(1):19. Available from:  
28 <http://www.njcponline.com/text.asp?2011/14/1/19/79234>  
29  
30  
31  
32  
33  
34 58. Kabo I, Otolorin E, Williams E, Orobato N, Abdullahi H, Sadauki H, et al.  
35 Monitoring maternal and newborn health outcomes in Bauchi State, Nigeria: An  
36 evaluation of a standards-based quality improvement intervention. *Int J Qual Heal*  
37 *Care*. 2016 Oct;28(5):566–72.  
38  
39  
40  
41 59. Chabikuli NO, Awi DD, Chukwujekwu O, Abubakar Z, Gwarzo U, Ibrahim M, et al.  
42 The use of routine monitoring and evaluation systems to assess a referral model of  
43 family planning and HIV service integration in Nigeria. *AIDS* [Internet]. 2009 Nov  
44 [cited 2020 Jul 2];23(SUPPL. 1):S97–103. Available from:  
45 <http://journals.lww.com/00002030-200911001-00011>  
46  
47  
48  
49  
50 60. Kalu CA, Umeora O, Sunday-Adeoye I. Review of Post-Abortion Care in South-  
51 Eastern Nigeria. *Afr J Reprod Health*. 2012;16(1):105.  
52  
53  
54 61. Joseph O, Biodun O, Michael E. Pregnancy outcome among HIV positive women  
55 receiving antenatal HAART versus untreated maternal HIV infection. *J Coll*  
56 *Physicians Surg Pakistan* [Internet]. 2011 [cited 2020 Jul 2];21(6):356–9. Available  
57 from: <https://pubmed.ncbi.nlm.nih.gov/21711992/>  
58  
59  
60



- 1  
2  
3  
4  
5  
6  
7  
8  
9  
10  
11  
12  
13  
14  
15  
16  
17  
18  
19  
20  
21  
22  
23  
24  
25  
26  
27  
28  
29  
30  
31  
32  
33  
34  
35  
36  
37  
38  
39  
40  
41  
42  
43  
44  
45  
46  
47  
48  
49  
50  
51  
52  
53  
54  
55  
56  
57  
58  
59  
60
62. Ojengbede OA, Morhason-Bello IO, Galadanci H, Meyer C, Nsima D, Camlin C, et al. Assessing the role of the non-pneumatic anti-shock garment in reducing mortality from postpartum hemorrhage in Nigeria. *Gynecol Obstet Invest* [Internet]. 2011 [cited 2020 Jul 2];71(1):66–72. Available from: [www.karger.com](http://www.karger.com)
  63. Chiwuzie J, Okojie O, Okolocha C, Omorogbe S, Oronsaye A, Akpala W, et al. Emergency loan funds to improve access to obstetric care in Ekpoma, Nigeria. *Int J Gynecol Obstet*. 1997;59(SUPPL. 2):0–5.
  64. Tukur J, Ahonsi B, Mohammed Ishaku S, Araoyinbo I, Okereke E, Babatunde AO. Maternal and fetal outcomes after introduction of magnesium sulphate for treatment of preeclampsia and eclampsia in selected secondary facilities: A low-cost intervention. *Matern Child Health J*. 2013;17(7):1191–8.
  65. Prata N, Ejembi C, Fraser A, Shittu O, Minkler M. Community mobilization to reduce postpartum hemorrhage in home births in northern Nigeria. *Soc Sci Med* [Internet]. 2012 Apr [cited 2020 Jul 27];74(8):1288–96. Available from: <https://pubmed.ncbi.nlm.nih.gov/22377106/>
  66. Hunyinbo K, Fawole A, Sotiloye O, Otolorin E. Evaluation of criteria-based clinical audit in improving quality of obstetric care in a developing country hospital. *Afr J Reprod Health* [Internet]. 2008 [cited 2020 Jul 3];12(3):59-70 12p. Available from: <http://www.bioline.org.br/pdf?rh08038>
  67. Okonofua FE, Ogu RN, Fabamwo AO, Ujah IO, Chama CM, Archibong EI, et al. Training health workers for magnesium sulfate use reduces case fatality from eclampsia: Results from a multicenter trial. *Acta Obstet Gynecol Scand*. 2013;92(6):716–20.
  68. Igwegbe AO, Eleje GU, Ugboaja JO, Ofiaeli RO. Improving maternal mortality at a university teaching hospital in Nnewi, Nigeria. *Int J Gynecol Obstet* [Internet]. 2012;116(3):197–200. Available from: <http://www.elsevier.com/locate/ijgo>
  69. Singh K, Khan SM, Carvajal-Aguirre L, Brodish P, Amouzou A, Moran A. The importance of skin-to-skin contact for early initiation of breastfeeding in Nigeria and Bangladesh. *J Glob Health* [Internet]. 2017 Dec [cited 2020 Jun 10];7(2):20505. Available from: [www.jogh.org](http://www.jogh.org)

- 1  
2  
3  
4  
5  
6  
7  
8  
9  
10  
11  
12  
13  
14  
15  
16  
17  
18  
19  
20  
21  
22  
23  
24  
25  
26  
27  
28  
29  
30  
31  
32  
33  
34  
35  
36  
37  
38  
39  
40  
41  
42  
43  
44  
45  
46  
47  
48  
49  
50  
51  
52  
53  
54  
55  
56  
57  
58  
59  
60
70. Galadanci H, Künzel W, Shittu O, Zinser R, Gruhl M, Adams S. Obstetric quality assurance to reduce maternal and fetal mortality in Kano and Kaduna State hospitals in Nigeria. *Int J Gynecol Obstet.* 2011;114(1):23–8.
  71. Gummi BF, Hassan M, Shehu D, Audu L. Community education to encourage use of emergency obstetric services, Kebbi State, Nigeria. *Int J Gynecol Obstet.* 1997;59(SUPPL. 2):S191–200.
  72. Miller S, Ojengbede O, Turan JM, Morhason-Bello IO, Martin HB, Nsima D. A comparative study of the non-pneumatic anti-shock garment for the treatment of obstetric hemorrhage in Nigeria. *Int J Gynecol Obstet.* 2009;107(2):121–5.
  73. Odusanya OO, Alufohai JE, Meurice FP, Clemens R, Ahonkhai VI. Short term evaluation of a rural immunization program in Nigeria. *J Natl Med Assoc.* 2003 Feb;95(2):175–9.
  74. Amoran O. Impact of health education intervention on malaria prevention practices among nursing mothers in rural communities in Nigeria. *Niger Med J [Internet].* 2013 [cited 2020 Jul 6];54(2):115. Available from: <https://www.ncbi.nlm.nih.gov/pmc/articles/PMC3687863/>
  75. Okonofua F, Lambo E, Okeibunor J, Agholor K. Advocacy for free maternal and child health care in Nigeria-Results and outcomes. *Health Policy (New York).* 2011 Feb 1;99(2):131–8.
  76. Findley SE, Uwemedimo OT, Doctor H V., Green C, Adamu F, Afenyadu GY. Comparison of high- versus low-intensity community health worker intervention to promote newborn and child health in Northern Nigeria. *Int J Womens Health [Internet].* 2013 Oct 25 [cited 2020 Jul 6];5(1):717–28. Available from: <https://www.ncbi.nlm.nih.gov/pmc/articles/PMC3814931/>
  77. Pathfinder International. The Maternal Health Care Improvement Initiative : Nigeria [Internet]. 2011 [cited 2020 Jul 6]. Available from: <https://www.pathfinder.org/publications/maternal-health-care-improvement-initiative-nigeria/>
  78. Galadanci HS, Idris SA, Sadauki HM, Yakasai IA. Programs and policies for reducing maternal mortality in Kano State, Nigeria: a review: original research article. *Afr J*

- 1  
2  
3  
4  
5  
6  
7  
8  
9  
10  
11  
12  
13  
14  
15  
16  
17  
18  
19  
20  
21  
22  
23  
24  
25  
26  
27  
28  
29  
30  
31  
32  
33  
34  
35  
36  
37  
38  
39  
40  
41  
42  
43  
44  
45  
46  
47  
48  
49  
50  
51  
52  
53  
54  
55  
56  
57  
58  
59  
60
- Reprod Health [Internet]. 2010;14(Special issue 3):31–6. Available from:  
<https://journals.co.za/content/ajrh/14/si-3/EJC123348>
79. Charurat E, Nasir B, Airede RL, Abdu-Aguye S, Emmanuel O, McKaig C. Postpartum Systematic Screening in Northern Nigeria : A Practical Application of Family Planning and Maternal Newborn and Child Health Integration [Internet]. USAID-ACCESS-FP Report. 2010 [cited 2020 Jul 7]. Available from:  
[http://resources.jhpiego.org/system/files/resources/ACCESS-FP\\_Nigeria\\_PPSS\\_Report.pdf](http://resources.jhpiego.org/system/files/resources/ACCESS-FP_Nigeria_PPSS_Report.pdf)
80. Omole O, Ijadunola MY, Olotu E, Omotoso O, Bello B, Awoniran O, et al. The effect of mobile phone short message service on maternal health in south-west Nigeria. *Int J Health Plann Manage* [Internet]. 2018 Jan;33(1):155–70. Available from:  
<https://onlinelibrary.wiley.com/doi/full/10.1002/hpm.2404>
81. Okoli U, Morris L, Oshin A, Pate MA, Aigbe C, Muhammad A, et al. Conditional cash transfer schemes in Nigeria: Potential gains for maternal and child health service uptake in a national pilot programme. *BMC Pregnancy Childbirth* [Internet]. 2014 Dec [cited 2020 Jun 10];14(1):408. Available from: <http://www.biomedcentral.com/1471-2393/14/408>
82. Liu JX, Shen J, Wilson N, Janumpalli S, Stadler P, Padian N. Conditional cash transfers to prevent mother-to-child transmission in low facility-delivery settings: evidence from a randomised controlled trial in Nigeria. *BMC Pregnancy Childbirth*. 2019 Jan;19(1):32.
83. Edu BC, Agan TU, Monjok E, Makowiecka K. Effect of free maternal health care program on health-seeking behavior of women during pregnancy, intra-partum and postpartum periods in Cross River State of Nigeria: A mixed method study. *Maced J Med Sci* [Internet]. 2017;5(3):370–82. Available from: <https://www.idpress.eu/mjms/article/download/oamjms.2017.075/1419>
84. Noguchi L, Grenier L, Kabue M, Ugwa E, Oyetunji J, Suhowatsky S, et al. Effect of group versus individual antenatal care on uptake of intermittent prophylactic treatment of malaria in pregnancy and related malaria outcomes in Nigeria and Kenya: Analysis of data from a pragmatic cluster randomized trial. *Malar J* [Internet]. 2020;19(1):51. Available from: <http://www.malariajournal.com/home/>

- 1  
2  
3  
4  
5  
6  
7  
8  
9  
10  
11  
12  
13  
14  
15  
16  
17  
18  
19  
20  
21  
22  
23  
24  
25  
26  
27  
28  
29  
30  
31  
32  
33  
34  
35  
36  
37  
38  
39  
40  
41  
42  
43  
44  
45  
46  
47  
48  
49  
50  
51  
52  
53  
54  
55  
56  
57  
58  
59  
60
85. Oguntunde O, Yusuf FM, Nyenwa J, Dauda DS, Salihu A, Sinai I. Emergency transport for obstetric emergencies: Integrating community-level demand creation activities for improved access to maternal, newborn, and child health services in northern Nigeria. *Int J Womens Health* [Internet]. 2018;10:773–82. Available from: <https://www.dovepress.com/getfile.php?fileID=46600>
  86. A.B. L, Lalonde AB, Grellier R. FIGO saving mothers and newborns initiative 2006-2011. *Int J Gynecol Obstet* [Internet]. 2012;119(SUPPL.1):S18–21. Available from: <http://www.elsevier.com/locate/ijgo>
  87. Okeke E, Glick P, Chari A, Abubakar IS, Pitchforth E, Exley J, et al. The effect of increasing the supply of skilled health providers on pregnancy and birth outcomes: evidence from the midwives service scheme in Nigeria. *BMC Health Serv Res*. 2016;16:425.
  88. Ameh CA, Kerr R, Madaj B, Mdegela M, Kana T, Jones S, et al. Knowledge and skills of healthcare providers in sub-Saharan Africa and Asia before and after competency-based training in emergency obstetric and early Newborn Care. *PLoS One* [Internet]. 2016;11(12):e0167270. Available from: <http://journals.plos.org/plosone/article/file?id=10.1371>
  89. Brals B, Aderibigbe S., Wit F., van Ophem JCM, van der List M, Osagbemi GK, et al. The effect of health insurance and health facility-upgrades on hospital deliveries in rural Nigeria: a controlled interrupted time-series study. *Health Policy Plan* [Internet]. 2017;32(7):990–1001. Available from: <https://www.ncbi.nlm.nih.gov/pmc/articles/PMC5886299/>
  90. Okeke EN, Pitchforth E, Exley J, Glick P, Abubakar IS, Chari AV, et al. Going to scale: design and implementation challenges of a program to increase access to skilled birth attendants in Nigeria. *BMC Health Serv Res* [Internet]. 2017;17(1):356. Available from: <https://bmchealthservres.biomedcentral.com/articles/10.1186/s12913-017-2284-2>
  91. Okereke E, Tukur J, Aminu A, Butera J, Mohammed B, Tanko M, et al. An innovation for improving maternal, newborn and child health (MNCH) service delivery in Jigawa State, northern Nigeria: a qualitative study of stakeholders' perceptions about clinical mentoring. *BMC Health Serv Res* [Internet]. 2015 Feb [cited 2020 Jun 10];15(64):64.

- 1  
2  
3 Available from: [https://bmchealthservres.biomedcentral.com/articles/10.1186/s12913-](https://bmchealthservres.biomedcentral.com/articles/10.1186/s12913-015-0724-4)  
4 015-0724-4  
5  
6  
7  
8 92. Oguntunde O, Nyenwa J, Yusuf FM, Dauda DS, Salihu A, Sinai I. The experience of  
9 men who participated in interventions to improve demand for and utilization of  
10 maternal and child health services in northern Nigeria: A qualitative comparative  
11 study. *Reprod Health* [Internet]. 2019;16(1):104. Available from:  
12 <http://www.reproductive-health-journal.com/home/>  
13  
14  
15  
16 93. Adaji SE, Jimoh A, Bawa U, Ibrahim HI, Olorukooba AA, Adelaiye H, et al. Women's  
17 experience with group prenatal care in a rural community in northern Nigeria. *Int J*  
18 *Gynecol Obstet* [Internet]. 2019;145(2):164–9. Available from:  
19 [http://obgyn.onlinelibrary.wiley.com/hub/journal/10.1002/\(ISSN\)1879-3479/](http://obgyn.onlinelibrary.wiley.com/hub/journal/10.1002/(ISSN)1879-3479/)  
20  
21  
22  
23 94. Onwujekwe O, Obi F, Ichoku H, N E, Okeke C, Ezenwaka U, et al. Assessment of a  
24 Free Maternal and Child Health Program and the Prospects for Program Re-Activation  
25 and Scale-Up using a New Health Fund in Nigeria. *Niger J Clin Pract* [Internet].  
26 2019;22(11):1516–29. Available from: [www.njcponline](http://www.njcponline)  
27  
28  
29  
30  
31 95. Brown VB, Oluwatosin OA, Akinyemi JO, Adeyemo AA. Effects of Community  
32 Health Nurse-Led Intervention on Childhood Routine Immunization Completion in  
33 Primary Health Care Centers in Ibadan, Nigeria. *J Community Health*. 2016  
34 Apr;41(2):265–73.  
35  
36  
37  
38 96. Asa OO, Onayade AA, Fatusi AO, Ijadunola KT, Abiona TC. Efficacy of intermittent  
39 preventive treatment of malaria with sulphadoxine-pyrimethamine in preventing  
40 anaemia in pregnancy among Nigerian women. *Matern Child Health J*.  
41 2008;12(6):692–8.  
42  
43  
44  
45 97. Walker JA, Hashim Y, Oranye N. Impact of Muslim opinion leaders' training of  
46 healthcare providers on the uptake of MNCH services in Northern Nigeria. *Glob*  
47 *Public Health* [Internet]. 2019;14(2):200–13. Available from:  
48 <http://www.tandf.co.uk/journals/titles/17441692.asp>  
49  
50  
51  
52 98. Ehigiegba A, Adibe N, Ekott M, Fakunle B, Fajola A. Making community and clinic-  
53 based PMTCT services more accessible: The role of a community health insurance  
54 scheme: A Nigerian Cottage hospital experience. *J Med Biomed Res* [Internet].  
55 2012;11(2):69–75. Available from:  
56  
57  
58  
59  
60

- 1  
2  
3 <http://www.ajol.info/index.php/jmbr/article/view/86098/75907>  
4  
5  
6 99. Adeleye OA, Aldoory L, Parakoyi DB, Parakoyi BD. Using local culture and gender  
7 roles to improve male involvement in maternal health in Southern Nigeria. *J Health*  
8 *Commun* [Internet]. 2011 Nov 1 [cited 2020 Jul 6];16(10):1122–35. Available from:  
9 <https://www.tandfonline.com/doi/abs/10.1080/10810730.2011.571340>  
10  
11  
12  
13 100. Haver J, Brieger W, Zoungrana J, Ansari N, Kagoma J. Experiences engaging  
14 community health workers to provide maternal and newborn health services:  
15 Implementation of four programs. *Int J Gynecol Obstet* [Internet]. 2015;130(S2):S32–  
16 9. Available from: <http://www.elsevier.com/locate/ijgo>  
17  
18  
19  
20 101. Okeibunor JC, Orji BC, Brieger W, Ishola G, Otolorin E, Rawlins B, et al. Preventing  
21 malaria in pregnancy through community-directed interventions: Evidence from Akwa  
22 Ibom State, Nigeria. *Malar J* [Internet]. 2011 [cited 2020 Jul 2];10:227. Available  
23 from: [/pmc/articles/PMC3161917/?report=abstract](http://www.ncbi.nlm.nih.gov/pmc/articles/PMC3161917/?report=abstract)  
24  
25  
26  
27 102. Findley SE, Doctor H V, Ashir GM, Kana MA, Mani AS, Green C, et al.  
28 Reinventing health systems and community-based services to improve maternal  
29 health outcomes: case study from northern Nigeria. *J Prim Care Community Health*  
30 [Internet]. 2015 Apr 12 [cited 2020 Jun 10];6(2):88–99. Available from:  
31 <http://www.ncbi.nlm.nih.gov/pubmed/25217416>  
32  
33  
34  
35  
36 103. Leight J, Sharma V, Brown W, Costica L, Abdulaziz Sule F, Bjorkman Nyqvist M, et  
37 al. Associations between birth kit use and maternal and neonatal health outcomes in  
38 rural Jigawa state, Nigeria: A secondary analysis of data from a cluster randomized  
39 controlled trial. *PLoS One* [Internet]. 2018 [cited 2020 Jun 10];13(12):e0208885.  
40 Available from: <https://doi.org/10.1371/journal.pone.0208885>  
41  
42  
43  
44  
45  
46 104. Chou D, Daelmans B, Jolivet RR, Kinney M, Say L. Ending preventable maternal and  
47 newborn mortality and stillbirths. *BMJ*. 2015 Sep 14;351:19–22.  
48  
49  
50 105. The African Academy of Sciences, The Academy of Medical Sciences. From minding  
51 the gap to closing the gap: Science to transform maternal and newborn survival and  
52 stillbirths in sub-Saharan Africa in the Sustainable Development Goals era. Nairobi;  
53 2018.  
54  
55  
56  
57 106. Marincola E, Kariuki T. Quality Research in Africa and Why it is Important. *ACS*  
58  
59  
60

- 1  
2  
3 Omega [Internet]. 2020 [cited 2021 Jan 8];5(38):24155–7. Available from:  
4 [https://www.aasciences.africa/sites/default/files/Publications/Quality Research in](https://www.aasciences.africa/sites/default/files/Publications/Quality%20Research%20in%20Africa%20and%20Why%20It%20Is%20Important.pdf)  
5 [Africa and Why It Is Important.pdf](https://www.aasciences.africa/sites/default/files/Publications/Quality Research in)  
6  
7  
8  
9 107. Tunçalp, Were WM, MacLennan C, Oladapo OT, Gülmezoglu AM, Bahl R, et al.  
10 Quality of care for pregnant women and newborns - The WHO vision. *BJOG An Int J*  
11 *Obstet Gynaecol*. 2015 Jul;122(8):1045–9.  
12  
13  
14 108. Bohren MA, Mehrtash H, Fawole B, Maung TM, Balde MD, Maya E, et al. How  
15 women are treated during facility-based childbirth in four countries: a cross-sectional  
16 study with labour observations and community-based surveys. *Lancet*. 2019  
17 Nov;394(10210):1750–63.  
18  
19  
20 109. Sacks E, Mehrtash H, Bohren M, Balde MD, Vogel JP, Adu-Bonsaffoh K, et al. The  
21 first 2 h after birth: prevalence and factors associated with neonatal care practices from  
22 a multicountry, facility-based, observational study. *Lancet Glob Heal*. 2021  
23 Jan;9(1):e72–80.  
24  
25  
26  
27  
28  
29  
30  
31  
32  
33  
34  
35  
36  
37  
38  
39  
40  
41  
42  
43  
44  
45  
46  
47  
48  
49  
50  
51  
52  
53  
54  
55  
56  
57  
58  
59  
60

1  
2  
3  
4  
5  
6  
7  
8  
9  
10  
11  
12  
13  
14  
15  
16  
17  
18  
19  
20  
21  
22  
23  
24  
25  
26  
27  
28  
29  
30  
31  
32  
33  
34  
35  
36  
37  
38  
39  
40  
41  
42  
43  
44  
45  
46  
47  
48  
49  
50  
51  
52  
53  
54  
55  
56  
57  
58  
59  
60

For peer review only



| WHO RECOMMENDED INTERVENTIONS FOR MATERNAL AND NEWBORN HEALTH |                                                                                                                                                                                   |                                                                                                                                                                                                                                                                              |                                                                                                                                                     |                                                                                                                                                                                                                                                                     |                                                                                                                                                                                                   |                                                                                                                                                                                                                                                            |              |
|---------------------------------------------------------------|-----------------------------------------------------------------------------------------------------------------------------------------------------------------------------------|------------------------------------------------------------------------------------------------------------------------------------------------------------------------------------------------------------------------------------------------------------------------------|-----------------------------------------------------------------------------------------------------------------------------------------------------|---------------------------------------------------------------------------------------------------------------------------------------------------------------------------------------------------------------------------------------------------------------------|---------------------------------------------------------------------------------------------------------------------------------------------------------------------------------------------------|------------------------------------------------------------------------------------------------------------------------------------------------------------------------------------------------------------------------------------------------------------|--------------|
| SOCIAL DETERMINANTS OF MATERNAL HEALTH                        | INTERMEDIATE                                                                                                                                                                      | <b>Health Systems:</b><br><i>Availability of services (FP, ANC, postnatal care, EMoC, blood, referral). Acceptability to community. Accessibility: distance, fees, related costs, medicines, and supplies. Quality of care: staff skills, technical competence.</i>          | Family Planning                                                                                                                                     | Management of unintended pregnancy.<br>Maternal health screening.<br>Tetanus immunization.<br>External cephalic version.<br>Induction of labour.<br>Antibiotics for preterm labour<br>Corticosteroids for respiratory distress.<br>Magnesium Sulphate for eclampsia | Induction of labour for prolonged pregnancy<br>PPH prevention<br>Active management of third stage of labour<br>Management of PPH<br>Caesarean section and prophylactic antibiotics                | Family Planning.<br>Immediate thermal care<br>Neonatal resuscitation by professional worker.<br>Kangaroo Mother Care for preterm/small babies.<br>CPAP.<br>Presumptive antibiotic for newborns at risk.<br>Extra support for feeding small/preterm babies. | Immunization |
|                                                               | <b>Community context:</b><br><i>Awareness of care. Perceived severity and cause, Rural/urban residence, Social capital.</i>                                                       | Home Visits                                                                                                                                                                                                                                                                  |                                                                                                                                                     |                                                                                                                                                                                                                                                                     |                                                                                                                                                                                                   |                                                                                                                                                                                                                                                            |              |
|                                                               | <b>Family and Peer Influence:</b><br><i>Family structure and decision making. Marital relationship/Spousal communication. Income/Access to resources. Support networks.</i>       | Male involvement interventions for MNH<br>Companion of choice during labor and childbirth<br>Participatory learning/action with women's groups<br>Community organised transport schemes                                                                                      |                                                                                                                                                     |                                                                                                                                                                                                                                                                     |                                                                                                                                                                                                   |                                                                                                                                                                                                                                                            |              |
|                                                               | <b>Biological context:</b><br><i>age, parity, health conditions, nutrition, pregnancy history. Behavioural: self-efficacy, knowledge, harmful practices, pre/intra/post care.</i> | Prevention and management of STI and HIV.<br>Folic Acid supplementation                                                                                                                                                                                                      | Birth and emergency preparedness<br>Counselling on FP<br>Prevent/manage HIV<br>Prevent/manage malaria<br>Prevent pre-eclampsia<br>Smoking cessation |                                                                                                                                                                                                                                                                     | Prevent/treat anaemia<br>Detect/manage sepsis<br>Screen/initiate/continue ARVs for HIV.<br>Hygiene cord and skin care<br>Initiation of exclusive breastfeeding.<br>Case management of infections. | Exclusive breastfeeding<br>Complimentary feeding after 6mths.<br>Vitamin A supplementation.<br>Prevent/manage infections.<br>Management of severe acute malnutrition.<br>Comprehensive care of infants exposed to HIV                                      |              |
| STRUCTURAL                                                    | <b>Governance/Policies:</b><br><i>Education, health finance/infrastructure, Occupation, Laws (gender equity, anti-violence, Social protection.</i>                                | Laws to expand access to family planning and safe abortion.<br>Policies to enhance access to education and lived opportunities.<br>Public policy to provide funding and infrastructure for maternal health.<br>Laws against marital rape, sexual and physical violence, FGM. |                                                                                                                                                     |                                                                                                                                                                                                                                                                     |                                                                                                                                                                                                   |                                                                                                                                                                                                                                                            |              |
|                                                               | <b>Culture and social values:</b><br><i>Women's status, Gender Norms, Religion Health Beliefs, Social Cohesion</i>                                                                | Prohibition of early or forced marriages.<br>Right to own and inherit property.<br>Social protection mechanisms, national health insurance schemes.                                                                                                                          |                                                                                                                                                     |                                                                                                                                                                                                                                                                     |                                                                                                                                                                                                   |                                                                                                                                                                                                                                                            |              |
|                                                               |                                                                                                                                                                                   | Adolescent Pre-pregnancy                                                                                                                                                                                                                                                     | Pregnancy                                                                                                                                           | Childbirth                                                                                                                                                                                                                                                          | Postnatal (mother/newborn)                                                                                                                                                                        | Infancy/childhood                                                                                                                                                                                                                                          |              |
| <b>CONTINUUM OF CARE APPROACH</b>                             |                                                                                                                                                                                   |                                                                                                                                                                                                                                                                              |                                                                                                                                                     |                                                                                                                                                                                                                                                                     |                                                                                                                                                                                                   |                                                                                                                                                                                                                                                            |              |

Figure 1: Integrated framework of the WHO recommendations, continuum of care approach and social determinants of maternal health.

244x153mm (300 x 300 DPI)

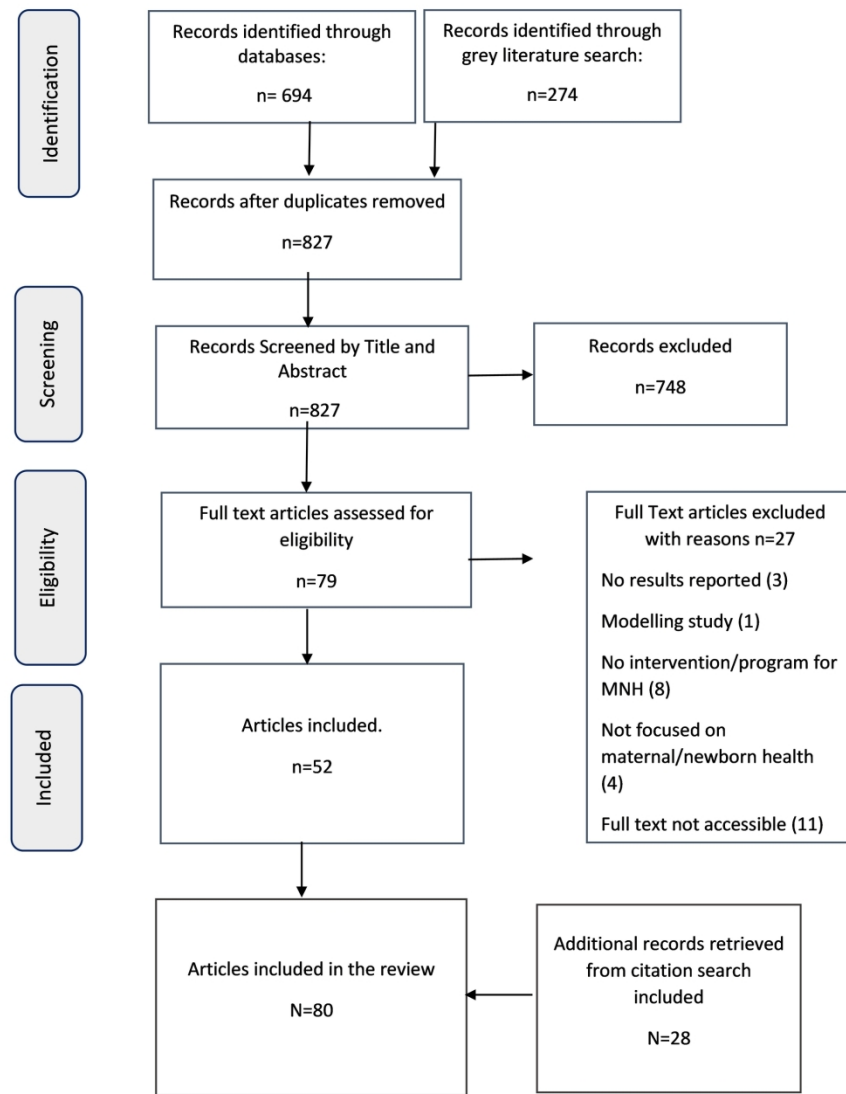

Figure 2: Flow chart of the selection process of sources of evidence.

169x230mm (300 x 300 DPI)

| WHO RECOMMENDED INTERVENTIONS FOR MATERNAL AND NEWBORN HEALTH |              |                                                                                                                                                                                                                                                                       |                          |                                                                |                                |                            |                   |                                                      |    |
|---------------------------------------------------------------|--------------|-----------------------------------------------------------------------------------------------------------------------------------------------------------------------------------------------------------------------------------------------------------------------|--------------------------|----------------------------------------------------------------|--------------------------------|----------------------------|-------------------|------------------------------------------------------|----|
| SOCIAL DETERMINANTS OF MATERNAL HEALTH                        | INTERMEDIATE | <b>Health Systems:</b><br>Availability of services (FP, ANC, postnatal care, EMoC, blood, referral).<br>Acceptability to community.<br>Accessibility: distance, fees, related costs, medicines, and supplies.<br>Quality of care: staff skills, technical competence. | 42,46-49,55              | 20,28,32,37,4<br>9,50,52,56,60<br>,63,64,78,80,<br>83,86,96,97 | 24,31,58,61,6<br>2,68,81,83,86 | 24,30,31,39,75,78          | 69,75,91          | 21,23,77,82,84,<br>87,90,98,25,43-<br>45,54,66,72,73 |    |
|                                                               |              | <b>Community context:</b><br>Awareness of care.<br>Perceived severity and cause.<br>Rural/urban residence.<br>Social capital.                                                                                                                                         |                          |                                                                |                                |                            |                   |                                                      | 67 |
|                                                               |              | <b>Family and Peer Influence:</b><br>Family structure and decision making.<br>Marital relationship/Spousal communication.<br>Income/Access to resources.<br>Support networks.                                                                                         |                          | 81                                                             | 81                             |                            |                   |                                                      | 95 |
|                                                               |              | <b>Biological context:</b><br>age, parity, health conditions, nutrition, pregnancy history.<br>Behavioural: self-efficacy, knowledge, harmful practices, pre/intra/post care.                                                                                         | 22,70                    | 26,36,51,53,7<br>6,80,89,92,99                                 |                                | 29,34,35,53,65             | 33                |                                                      |    |
| SOCIAL DETERMINANTS OF MATERNAL HEALTH                        | STRUCTURAL   | <b>Governance/Policies:</b><br>Education, health finance/infrastructure, Occupation, Laws (gender equity, anti-violence, Social protection.                                                                                                                           | 71,74,79,85,94           |                                                                |                                |                            |                   |                                                      |    |
|                                                               |              | <b>Culture and social values:</b><br>Women's status, Gender Norms, Religion Health Beliefs, Social Cohesion                                                                                                                                                           | 41,88,93                 |                                                                |                                |                            |                   |                                                      |    |
|                                                               |              |                                                                                                                                                                                                                                                                       | Adolescent Pre-pregnancy | Pregnancy                                                      | Childbirth                     | Postnatal (mother/newborn) | Infancy/childhood | Across the Continuum                                 |    |
| <b>CONTINUUM OF CARE APPROACH</b>                             |              |                                                                                                                                                                                                                                                                       |                          |                                                                |                                |                            |                   |                                                      |    |

Figure 3: Mapping of interventions to the WHO recommendations, continuum of care approach and social determinants of health.

246x166mm (300 x 300 DPI)

1  
2  
3  
4  
5  
6  
7  
8  
9  
10  
11  
12  
13  
14  
15  
16  
17  
18  
19  
20  
21  
22  
23  
24  
25  
26  
27  
28  
29  
30  
31  
32  
33  
34  
35  
36  
37  
38  
39  
40  
41  
42  
43  
44  
45  
46  
47  
48  
49  
50  
51  
52  
53  
54  
55  
56  
57  
58  
59  
60

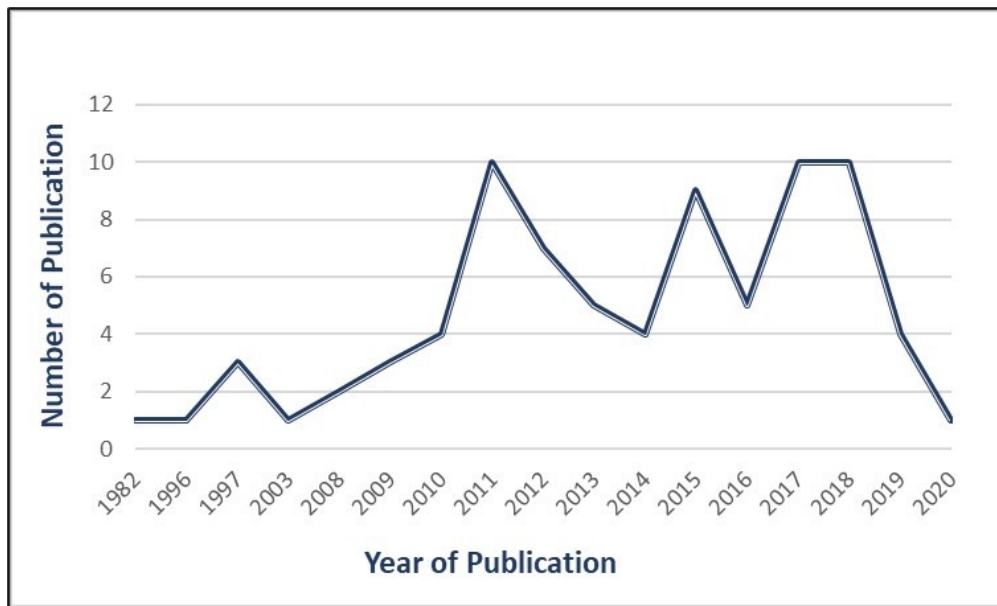

Figure 4: Number of publications per year.

64x38mm (300 x 300 DPI)

## Supplementary File 1: Search strategy and terms

### PubMed search terms: 1<sup>st</sup> June, 2020.

((("Maternal Health"[Mesh]) OR "Infant, Newborn"[Mesh]) OR "Infant Health"[Mesh]) AND "Nigeria"[Mesh]) AND (("intervention" OR "program" OR "strategy"))

### Embase search strategy: 11<sup>th</sup> July, 2020

1. "Maternal Health".mp. or maternal welfare/
2. "Infant, newborn".mp. or newborn/
3. "infant health".mp. or child health/
4. newborn care/ or "Newborn Health".mp.
5. 1 or 2 or 3 or 4
6. Nigeria.mp. [mp=title, abstract, heading word, drug trade name, original title, device manufacturer, drug manufacturer, device trade name, keyword, floating subheading word, candidate term word]
7. ("intervention" or "program" or "strategy").mp. [mp=title, abstract, heading word, drug trade name, original title, device manufacturer, drug manufacturer, device trade name, keyword, floating subheading word, candidate term word]
8. 5 and 6 and 7

### Scopus search terms: 22<sup>nd</sup> July, 2020.

{maternal health} AND {newborn health} AND "Nigeria" AND "intervention" OR "program\*".

### Websites of key organisations searched on Google 22<sup>nd</sup> July 2020.

Jhpiego

USAID/Maternal and Child Survival Program

Maternal Newborn Child Health (MNCH2) program

World Health Organisation

United Nations Children's Fund

Bill and Melinda Gates Foundation

Supplementary File 2: Table S2: Data extraction tool and characteristics of included studies.

| Authors/<br>Publication<br>Year &<br>Lead author<br>Institution | Geographical<br>location/<br>setting/site                                                  | Study design and<br>Objective(s)                                                                                                                                                                                                                                  | Type of<br>Intervention*                                                                                                                                                                                  | Stage in<br>continuum of<br>care &<br>Target<br>Population(s)                                                                                                             | Reported Outcomes<br>(or<br>effectiveness/impact)                                                                                                                                                                              | Intended<br>outcomes<br>achieved<br>(Yes/No)                                                                                                                             | Barriers/challenges<br>and/or Facilitators                                                                     |
|-----------------------------------------------------------------|--------------------------------------------------------------------------------------------|-------------------------------------------------------------------------------------------------------------------------------------------------------------------------------------------------------------------------------------------------------------------|-----------------------------------------------------------------------------------------------------------------------------------------------------------------------------------------------------------|---------------------------------------------------------------------------------------------------------------------------------------------------------------------------|--------------------------------------------------------------------------------------------------------------------------------------------------------------------------------------------------------------------------------|--------------------------------------------------------------------------------------------------------------------------------------------------------------------------|----------------------------------------------------------------------------------------------------------------|
| Sloan et al <sup>24</sup><br>(2018)<br><br>International        | Kano, Katsina<br>and Kaduna<br>(NW)<br>urban and rural<br>community and<br>health facility | Program<br>evaluation<br>(before-after<br>analysis):<br>To evaluate the<br>MNH program<br>impact on<br>reducing<br>women's,<br>neonatal and<br>perinatal<br>mortality, and<br>stillbirth                                                                          | Integrated<br>maternal and<br>neonatal health<br>program: multiple<br>interventions to<br>address delays in<br>accessing care,<br>provide<br>emergency<br>obstetric care and<br>manage<br>complications*. | Pregnancy and<br>childbirth<br><br>Pregnant<br>women and<br>newborns                                                                                                      | Statistically<br>significant declines in<br>Maternal mortality,<br>Stillbirth, Neonatal<br>mortality, and<br>Perinatal mortality<br>rates.                                                                                     | Yes:<br>Improvements in<br>maternal and<br>newborn survival<br>observed.                                                                                                 | Facilitators:<br>Promoting local<br>ownership                                                                  |
| Oguntunde et<br>al <sup>25</sup> (2018)<br><br>Nigeria          | Jigawa, Kaduna<br>and Kano (NW)<br>urban<br>health facility                                | Post intervention<br>analysis<br>(qualitative<br>study):<br>To assess the<br>Facility Health<br>Committees<br>established in<br>three states in<br>northern Nigeria<br>as a platform to<br>improve the<br>quality of<br>maternal and<br>child health<br>services. | Facility Health<br>committees.*                                                                                                                                                                           | Across the<br>continuum of<br>care<br><br>Facility health<br>committee<br>members:<br>facility health<br>providers<br>facility clients<br>including<br>pregnant<br>women. | Committee members,<br>health providers, and<br>facility clients all<br>agree that the<br>committees have a<br>tangible positive<br>effect on the provision<br>of maternal and child<br>health services and<br>quality of care. | Yes: Facility<br>health committees<br>appear to have a<br>positive influence<br>on quality of<br>maternal and<br>child health<br>services in the<br>selected facilities. | Barriers: Inadequate<br>funding.<br><br>Facilitators: Gaining<br>trust and support of<br>community<br>members. |

|                                                                 |                                              |                                                                                                                                                                                                   |                                                                                                                    |                                                                                                                          |                                                                                                                                                                                                                                               |                                                                                                                                    |                                                                                                                                                                            |
|-----------------------------------------------------------------|----------------------------------------------|---------------------------------------------------------------------------------------------------------------------------------------------------------------------------------------------------|--------------------------------------------------------------------------------------------------------------------|--------------------------------------------------------------------------------------------------------------------------|-----------------------------------------------------------------------------------------------------------------------------------------------------------------------------------------------------------------------------------------------|------------------------------------------------------------------------------------------------------------------------------------|----------------------------------------------------------------------------------------------------------------------------------------------------------------------------|
| <p>Alexander et al<sup>26</sup> (2018)</p> <p>International</p> | <p>Oyo (SW) rural community</p>              | <p>RCT:<br/>To compare pregnancy outcomes in women exposed to household air pollution from wood and kerosene fuel stoves to women who received ethanol CleanCook stoves.</p>                      | <p>CleanCook ethanol Stoves [plus training on how to use the stove and prevent the dangers of smoke exposure].</p> | <p>Pregnancy<br/><br/>Pregnant women</p>                                                                                 | <p>Improved birth outcomes (mean birth weight, average gestational age at birth) were higher in ethanol stove users. Perinatal mortality (stillbirths and neonatal deaths) was twice as high in controls compared to ethanol stove users.</p> | <p>Yes: Transition from traditional biomass/ kerosene fuel to ethanol among pregnant women reduced adverse pregnancy outcomes.</p> | <p>Facilitators:<br/>Adequate education on the use of intervention.</p>                                                                                                    |
| <p>Abegunde et al<sup>27</sup> (2015)</p> <p>Nigeria</p>        | <p>Bauchi (NE) rural health facility</p>     | <p>Program evaluation (outcome):<br/>To estimate the impact of the MNCH/FP/RH interventions implemented in Bauchi State and to evaluate the progress towards the achievement of MDGs 4 and 5.</p> | <p>Integrated MNCH/FP/RH program. *</p>                                                                            | <p>Across the continuum of care<br/><br/>Women of childbearing age (15-49 years).</p>                                    | <p>Maternal, newborn and child health indicators in the continuum of care neither reached the national average nor attained the 90% globally recommended coverage level.</p>                                                                  | <p>No: For several of the indicators, a modest improvement from baseline was found following the program.</p>                      | <p>Barriers: Inadequate financing, inadequate essential human resources for implementation.<br/><br/>Facilitators: Involvement of community members in implementation.</p> |
| <p>Cannon et al<sup>28</sup> (2017)</p> <p>International</p>    | <p>Sokoto (NW) urban and rural community</p> | <p>Post intervention assessment (qualitative):<br/>To assess the perceived successes and benefits of using Misoprostol and Chlorhexidine as</p>                                                   | <p>Drugs/medication<br/>Use of Misoprostol and Chlorhexidine gel. *</p>                                            | <p>Childbirth/Post natal newborn<br/><br/>Mothers and husbands health workers health service providers policy makers</p> | <p>Community-based distribution of Misoprostol and Chlorhexidine intervention was successful with overwhelming support for the use of the two drugs among users,</p>                                                                          | <p>Yes.</p>                                                                                                                        | <p>Barriers: Stocks outs, shortage of staff, socio-cultural barriers, myths, and fears about the medication.<br/><br/>Facilitators: Early advocacy with</p>                |

|                                                            |                                                                     |                                                                                                                                                                     |                                                              |                                                                            |                                                                                                                                                                                                                                                                                                                                                                        |                                                                                                                                                                                                                                                                               |                                                                                                                          |
|------------------------------------------------------------|---------------------------------------------------------------------|---------------------------------------------------------------------------------------------------------------------------------------------------------------------|--------------------------------------------------------------|----------------------------------------------------------------------------|------------------------------------------------------------------------------------------------------------------------------------------------------------------------------------------------------------------------------------------------------------------------------------------------------------------------------------------------------------------------|-------------------------------------------------------------------------------------------------------------------------------------------------------------------------------------------------------------------------------------------------------------------------------|--------------------------------------------------------------------------------------------------------------------------|
|                                                            |                                                                     | reported by different types of key stakeholders.                                                                                                                    |                                                              |                                                                            | their spouses, and members of drug distribution system                                                                                                                                                                                                                                                                                                                 |                                                                                                                                                                                                                                                                               | government and broader stakeholder engagement.                                                                           |
| Findley et al <sup>29</sup><br>(2013)<br><br>International | Katsina, Yobe, Zamfara (NE and NW)<br><br>urban and rural community | Program evaluation (quasi-experimental design):<br>Examine the extent to which the intervention program has facilitated improvements in key behaviours and outcomes | Integrated maternal, newborn, and child health program*      | Across the continuum of care<br><br>Women of childbearing age 15-49 years. | Between baseline and follow-up, the rates of anti-tetanus vaccination and early breast feeding increased. Also, more newborns were checked by trained health workers. Women were performing more of the critical newborn care activities at follow-up, relied less on TBAs for health advice, and more on trained health workers. Infant and child mortality declined. | Yes: In the context of ongoing improvements to the primary health care system, the participatory and community-based interventions focusing on improved newborn and infant care were effective at changing infant care practices and outcomes in the intervention communities | Facilitators:<br>Integrated approach of program, quality improvement at facilities, community participation and support. |
| Ishola et al <sup>30</sup><br>(2017)<br><br>Nigeria        | Kano and Zamfara (NW)<br><br>urban and rural community              | Program evaluation (outcome):<br>To characterize the effects of volunteer household counsellors (VHCs) upon improving                                               | ACCESS/Maternal and Child Health Integrated Program (MCHIP)* | Pregnancy<br><br>Pregnant women/mother                                     | Mothers who received counselling had better knowledge of BPCR compared to women who did not. Mothers who received counselling had greater odds of recognising danger                                                                                                                                                                                                   | Yes: VHCs have substantially increased knowledge of BPCR and danger signs among women.                                                                                                                                                                                        |                                                                                                                          |



|                                                         |                                   |                                                                                                                                                             |                                                                   |                                                |                                                                                                                                                                                                                                                                                                               |                                                                                                                                                                           |                                                                                                                        |
|---------------------------------------------------------|-----------------------------------|-------------------------------------------------------------------------------------------------------------------------------------------------------------|-------------------------------------------------------------------|------------------------------------------------|---------------------------------------------------------------------------------------------------------------------------------------------------------------------------------------------------------------------------------------------------------------------------------------------------------------|---------------------------------------------------------------------------------------------------------------------------------------------------------------------------|------------------------------------------------------------------------------------------------------------------------|
|                                                         |                                   | knowledge of birth preparedness and complication readiness (BPCR)                                                                                           |                                                                   |                                                | signs during delivery and post-partum.                                                                                                                                                                                                                                                                        |                                                                                                                                                                           |                                                                                                                        |
| Orobaton et al <sup>31</sup><br>(2016)<br>International | Sokoto state (NW) rural community | Program evaluation (process and outcome):<br>To evaluate the community distributed SP program.                                                              | Community distribution of SP for Malaria-In-Pregnancy*            | Pregnancy<br><br>Pregnant women                | Up to 95% coverage of SP1 doses in the intervention LGAs compared to 26% in the counterfactual LGAs. Measurable SP3+ coverage was 45% in the intervention and 0% in the counterfactual. Increased doses of IPTp-SP were associated with increases in newborn head circumference and lower odds of stillbirth. | Yes: Scale up and delivery of high impact IPTp-SP interventions in low resource malaria endemic settings, where few women access facility-based maternal health services  | Facilitators:<br>Authentic community ownership, integrated approach of program, community involvement, peer influence. |
| Ezugwu et al <sup>32</sup><br>(2014)<br>Nigeria         | Enugu (SE) urban health facility  | Post intervention assessment (retrospective review of program data):<br>Evaluating the impact of the adoption of this evidence-based guidelines on maternal | Promotion of Evidence based management of obstetric complications | Pregnancy and childbirth<br><br>Pregnant women | There was a significant reduction in case fatality rate for both eclampsia (15.8% vs. 2.7%; P = 0.024, odds ratio = 5.84) and Postpartum haemorrhage (13.6% vs. 2.5% P value = 0.023, odds ratio = 5.5). There was 43.5% reduction in the MMR                                                                 | Yes:<br>Implementation of evidence-based guidelines/ intervention is possible in low resource settings and contributes to a significant reduction in the maternal deaths. |                                                                                                                        |

|                                                |                                                  |                                                                                                                                                                                                  |                                                                                 |                                                                 |                                                                                                                                                                                                                                                                                                               |                                                                                                                                                                                                                              |                                                                                                                                                                                                                                                        |
|------------------------------------------------|--------------------------------------------------|--------------------------------------------------------------------------------------------------------------------------------------------------------------------------------------------------|---------------------------------------------------------------------------------|-----------------------------------------------------------------|---------------------------------------------------------------------------------------------------------------------------------------------------------------------------------------------------------------------------------------------------------------------------------------------------------------|------------------------------------------------------------------------------------------------------------------------------------------------------------------------------------------------------------------------------|--------------------------------------------------------------------------------------------------------------------------------------------------------------------------------------------------------------------------------------------------------|
|                                                |                                                  | mortality reduction.                                                                                                                                                                             |                                                                                 |                                                                 | with the intervention (488 vs. 864/100 000 live births P = 0.039, odds ratio = 1.77).                                                                                                                                                                                                                         |                                                                                                                                                                                                                              |                                                                                                                                                                                                                                                        |
| Orobaton et al <sup>33</sup> (2015)<br>Nigeria | Sokoto (NW) rural community                      | Post program evaluation (retrospective analysis of program data): To evaluate the impact of scaling up the use of chlorhexidine digluconate 7.1% gel using a community-based distribution system | Drugs/medication : Chlorhexidine digluconate 7.1% gel plus misoprostol tablets* | Childbirth and Postnatal (newborn).<br><br>Mothers and newborns | Of newborns that received the intervention (gel), 99.97% survived past 28 days.                                                                                                                                                                                                                               | Yes: Community led efforts to scale up the use of a single dose application of chlorhexidine digluconate 7.1% gel and instructions on the hygienic care of the cord after application led to high rates of newborn survival. | Barriers: Inadequate financing/heavy reliance on donor funding, problems with supply/availability of commodities.<br><br>Facilitators: Community ownership and active involvement of men, evidence-based advocacy to government and community leaders. |
| Disu et al <sup>34</sup> (2015)<br>Nigeria     | All six geopolitical zones urban health facility | Post intervention assessment (cross sectional study): To evaluate the post-training neonatal resuscitation activities among doctors, nurses, and midwives across Nigeria                         | Capacity Building: Neonatal Resuscitation training                              | Postnatal (newborn)<br><br>Health workers                       | Over a five-year period (2008 to 2012), a total of 727 health workers were trained. At baseline, delivery attendance rates were 11 per doctor and 9 per nurse/midwife. These rates increased to 30 per doctor and 47 per nurse in 2012. Over 90% of doctors and nurses successfully used bag and mask to help | Yes: Neonatal resuscitation training in Nigeria is well-subscribed, successful and the frequency and scope of step-down trainings are good.                                                                                  |                                                                                                                                                                                                                                                        |

|                                                 |                                               |                                                                                                                                                                                                              |                                                                                                                            |                                                                             |                                                                                                                                                                                                                                                                                                                                          |                                                                                                                                                                      |                                                                                                     |
|-------------------------------------------------|-----------------------------------------------|--------------------------------------------------------------------------------------------------------------------------------------------------------------------------------------------------------------|----------------------------------------------------------------------------------------------------------------------------|-----------------------------------------------------------------------------|------------------------------------------------------------------------------------------------------------------------------------------------------------------------------------------------------------------------------------------------------------------------------------------------------------------------------------------|----------------------------------------------------------------------------------------------------------------------------------------------------------------------|-----------------------------------------------------------------------------------------------------|
|                                                 |                                               |                                                                                                                                                                                                              |                                                                                                                            |                                                                             | babies breathe in the post-training period.                                                                                                                                                                                                                                                                                              |                                                                                                                                                                      |                                                                                                     |
| Kwast <sup>35</sup> (1996)<br><br>International | Oyo and Bauchi (SW, NE) urban health facility | Program evaluation (outcome): To describe selected MotherCare demonstration projects in the first 5 years between 1989 and 1993 in Bolivia, Guatemala, Indonesia, and Nigeria                                | Safe MotherHood Project: Lifesaving skills training for midwives and interpersonal communication skills for all providers* | Childbirth and Postnatal (mother and newborn).<br><br>Professional midwives | Significant reductions in postpartum haemorrhage and in prolonged labour; and a decline in intrapartum stillbirths, postpartum sepsis and broken-down episiotomies was observed. Midwives performed more than half of all vacuum extractions. Some reductions in maternal death were seen.                                               | Yes: The upgrading of skills together with provision of supplies and a supportive management policy ultimately saved lives through an enhanced delivery environment. |                                                                                                     |
| Eluwa et al <sup>36</sup> (2018)<br><br>Nigeria | Kano (NW) urban health facility               | Quasi-experimental design: To assess the effect of centering pregnancy group (CPG) antenatal care on the uptake of antenatal care (ANC), facility delivery and immunization rates for infants in Kano state. | Centering Pregnancy-group (CPG) prenatal care program                                                                      | Pregnancy Pregnant women 15–49 years of age and newborns.                   | Statistically significant improvement in proportion of women attending ANC at least once in the 2nd and 3rd trimester in intervention versus control group. More women in the intervention group had a health facility delivery, were more likely to immunize babies at 6 and 14 weeks and more likely to use postnatal health services. | Yes: Intervention had a positive effect on the use of antenatal services, facility delivery and postnatal services.                                                  | Barriers: lack of trust in health system, strong influence of socio-cultural beliefs and practices. |

|                                                                                           |                                                           |                                              |                                                                                                                                                                                           |                                                                            |                                                         |                                                                                                                                                                                                                                                        |                                                                                                                                                                            |                                                                                                                |
|-------------------------------------------------------------------------------------------|-----------------------------------------------------------|----------------------------------------------|-------------------------------------------------------------------------------------------------------------------------------------------------------------------------------------------|----------------------------------------------------------------------------|---------------------------------------------------------|--------------------------------------------------------------------------------------------------------------------------------------------------------------------------------------------------------------------------------------------------------|----------------------------------------------------------------------------------------------------------------------------------------------------------------------------|----------------------------------------------------------------------------------------------------------------|
| 1<br>2<br>3<br>4<br>5<br>6<br>7<br>8<br>9<br>10<br>11<br>12<br>13<br>14<br>15<br>16<br>17 | Sam-Agudu et al <sup>37</sup> (2017)<br><br>Nigeria       | Nassarawa and FCT (NC) urban health facility | Prospective matched cohort study:<br>Investigate the impact of a structured peer support intervention on EID presentation and secondarily on HIV-free survival among HIV-exposed infants. | Mentor Mothers program*                                                    | Postnatal (newborn)<br><br>Mothers and newborns         | Exposure to MM support was associated with higher odds of timely EID presentation among infants, compared with routine PS (adjusted odds ratios = 3.7, 95% confidence interval: 2.8 to 5.0).                                                           | Yes: Closely supervised, organized MM support significantly improved presentation for EID among HIV-exposed infants and uptake of EID testing in a rural Nigerian setting. | Facilitators: supportive supervision and quality of interactions between clients and mentors.                  |
| 18<br>19<br>20<br>21<br>22<br>23<br>24<br>25<br>26<br>27<br>28<br>29<br>30<br>31<br>32    | Qureshi et al <sup>38</sup> (2011).<br><br>International  | Sokoto (NW) rural community                  | Randomised community trial:<br>To assess the impact of community volunteers to promote exclusive breastfeeding.                                                                           | Counselling on EBF by community volunteers*                                | Postnatal (mothers and newborn).<br><br>Nursing mothers | After counselling, the proportion of mothers with intention to EBF (a knowledge score > 50%) increased significantly and women who were exclusively breastfeeding increased. A significant proportion of women agreed EBF was beneficial to the child. | Yes: Counselling served as a useful strategy for promoting the duration of EBF for six months and for developing support systems for nursing mothers.                      |                                                                                                                |
| 33<br>34<br>35<br>36<br>37<br>38<br>39<br>40<br>41<br>42<br>43<br>44<br>45<br>46<br>47    | Davies-Adetugbo et al <sup>39</sup> (1997)<br><br>Nigeria | Osun (SW) rural community                    | Pre/post intervention assessment:<br>To evaluate the impact of training community extension health workers on                                                                             | Training of community extension health workers on promoting breastfeeding* | Postnatal (mothers and newborn)<br><br>Pregnant women   | Significant increase in early initiation of breastfeeding by mothers who delivered at perinatal facilities staffed by ISBFP-trained PHC workers. 32% of the                                                                                            | Yes: The results suggest that the training enhanced the health workers' knowledge about EBF and attitudes towards                                                          | Barriers: Negative attitudes towards EBF.<br><br>Facilitators: Community participation and linkages, trainings |

|                                                         |                                                            |                                                                                                                                                                           |                                                                      |                                 |                                                                                                                                                                                                                                                                                                                                                  |                                                                                                                                                                                   |                                                                                                                   |
|---------------------------------------------------------|------------------------------------------------------------|---------------------------------------------------------------------------------------------------------------------------------------------------------------------------|----------------------------------------------------------------------|---------------------------------|--------------------------------------------------------------------------------------------------------------------------------------------------------------------------------------------------------------------------------------------------------------------------------------------------------------------------------------------------|-----------------------------------------------------------------------------------------------------------------------------------------------------------------------------------|-------------------------------------------------------------------------------------------------------------------|
|                                                         |                                                            | breastfeeding knowledge and practice among mothers in rural communities                                                                                                   |                                                                      |                                 | deliveries in intervention area reported early initiation of breastfeeding (within 30min of delivery) compared with only 6% in the control area. In all instances, trained PHC workers had better knowledge of and attitudes towards breastfeeding and made the correct recommendations on all aspects of breastfeeding than untrained controls. | breastfeeding, and that these workers have had a positive impact on at least one aspect of breastfeeding behaviour in the community: mothers' timely initiation of breastfeeding. | conducted in local language.                                                                                      |
| Ojofeitimi et al <sup>40</sup> (1982)<br><br>Nigeria    | Oyo (SW) urban health facility                             | Pre/post intervention assessment: To investigate the effect of regular nutritional counselling and fear mechanism techniques to motivate pregnant women to consume foods. | Nutritional counselling*                                             | Pregnancy<br><br>Pregnant women | The experimental group had a significant pattern of monthly weight gain (P < 0.02) and heavier babies (P < 0.01) than the control group.                                                                                                                                                                                                         | Yes: Nutritional counselling served to correct erroneous assumptions and aversions about food.                                                                                    |                                                                                                                   |
| Danmusa et al <sup>41</sup> (2014)<br><br>International | All six geopolitical zones urban and rural health facility | Program evaluation (process): To describe the findings of program                                                                                                         | Magnesium sulphate for the treatment of pre-eclampsia and eclampsia* | Pregnancy<br><br>Pregnant women | A significant drop in the case fatality rate due to eclampsia from 20.9% before the start of services to 2.3% after was observed in                                                                                                                                                                                                              | Yes: Reductions in deaths due to eclampsia, and states have collectively made significant                                                                                         | Barriers: High frequency of home births, resistance to change from health providers, inadequate number of trained |

|                                                                                  |                                                                          |                                                                                                                                                                                                  |                                                                                                                |                                                                           |                                                                                                                                                                                                |                                                                                                                                                                                                                               |                                                                                                                                                                                     |
|----------------------------------------------------------------------------------|--------------------------------------------------------------------------|--------------------------------------------------------------------------------------------------------------------------------------------------------------------------------------------------|----------------------------------------------------------------------------------------------------------------|---------------------------------------------------------------------------|------------------------------------------------------------------------------------------------------------------------------------------------------------------------------------------------|-------------------------------------------------------------------------------------------------------------------------------------------------------------------------------------------------------------------------------|-------------------------------------------------------------------------------------------------------------------------------------------------------------------------------------|
|                                                                                  |                                                                          | evaluation, including the challenges encountered while implementing the projects, the successes achieved, and existing opportunities for future scaling up of the services across the country.   |                                                                                                                |                                                                           | the lead state, Kano. A significant case fatality drop (from 15.1% to 2.7%) across the six state hospitals lends local legitimacy to the use of the drug to treat pre-eclampsia and eclampsia. | progress towards the full integration of the use of magnesium sulfate into the Nigerian healthcare system.                                                                                                                    | staff for implementation, poor quality of services.<br><br>Facilitators: Advocacy to stakeholders, community involvement, supportive national health policies, enhanced monitoring. |
| Maternal, Newborn and Child Health Programme <sup>42</sup> (2017)<br><br>Nigeria | Jigawa, Kaduna, Kano, Katsina, Yobe, Zamfara (NW and NE) rural community | Program process and outcome evaluation: Evaluation of a program to increase access and uptake to Reproductive, Maternal, Newborn and Child Health (RMNCH) services for hard-to-reach communities | Integrated MNCH outreach services: increasing demand and access to MNCH services in hard-to-reach communities* | Across the continuum of care.<br><br>Women and young married adolescents. | 271 hard-to-reach communities accessed with integrated RMNCH outreach services.                                                                                                                | Yes: Prior to intervention, the outreach teams were not meeting the full needs for maternal and child health in communities. The program has ensured a continuum of care for MNCH services, even in the most rural locations. | Facilitators: Community engagement, community needs assessment, support from states and national governments.                                                                       |
| Maternal and Child Survival Program <sup>43</sup> (2018)<br><br>Nigeria          | Kogi, Ebonyi (NC and SE) rural health facility                           | Post program outcome evaluation: To reduce newborn mortality through the                                                                                                                         | Provision of key newborn interventions: neonatal resuscitation, KMC etc*                                       | Postnatal (newborn) newborns                                              | ENC defined as provision of skin-to-skin contact after birth, clean cord care with or without CHX, and early initiation of breastfeeding -within                                               | Yes: MCSP's newborn health strategies have promoted the scale up of high impact interventions that                                                                                                                            | Facilitators: Incorporation into local authority's strategy health plan, demand creation activities, staff retention.                                                               |

|                                                                              |                                                                       |                                                                                                                                                                |                                                      |                                                               |                                                                                                                                                                                                                                                                                                                                    |                                                                                                                                                                                                           |                                                                                                               |
|------------------------------------------------------------------------------|-----------------------------------------------------------------------|----------------------------------------------------------------------------------------------------------------------------------------------------------------|------------------------------------------------------|---------------------------------------------------------------|------------------------------------------------------------------------------------------------------------------------------------------------------------------------------------------------------------------------------------------------------------------------------------------------------------------------------------|-----------------------------------------------------------------------------------------------------------------------------------------------------------------------------------------------------------|---------------------------------------------------------------------------------------------------------------|
|                                                                              |                                                                       | implementation of key newborn interventions.                                                                                                                   |                                                      |                                                               | 30 minutes of birth increased from about 26% to 92%. Over 90% of asphyxiated babies in intervention states received successful neonatal resuscitation. Uptake and use of CHX increased from 0% at baseline to about 92%.                                                                                                           | address the three major causes of newborn morbidity and mortality in Nigeria.                                                                                                                             |                                                                                                               |
| Maternal and Child Survival Program <sup>44</sup> (2018)<br>Nigeria          | Kogi, (NC and SE) rural health facility                               | Post program outcome evaluation: To increase voluntary family planning uptake among postpartum women delivering in health facilities in Kogi and Ebonyi states | Integrated Post-Partum Family Planning Intervention* | Postnatal (mothers)<br>Postpartum women                       | PPFP services were initiated in 233 health facilities, with 637 health care workers empowered to provide PPFP services. This increased the pool of competent service providers for both post-partum FP and long-acting reversible contraceptives (LARC). There was improved strategic planning for family planning in both states. | Yes: Trends show contraceptive access for voluntary post-partum family planning has increased in both states, despite initial low contraceptive use prevalence with an estimated 25k pregnancies averted. | Facilitators: Availability of competent health providers, effective provision of health information to women. |
| Maternal, Newborn and Child Health Programme <sup>45</sup> (2017)<br>Nigeria | Jigawa, Kano, Kaduna, Katsina, Yobe, Zamfara (NW, NE) rural community | Program outcome evaluation: To improve health message delivery to men and encourage their active role in                                                       | Male Support Groups*                                 | Across the continuum of care<br>Males in intervention states. | Over 1500 support groups established and supported. Over 4,000 interpersonal communication sessions held.                                                                                                                                                                                                                          | Yes.                                                                                                                                                                                                      | Facilitators: Active community/stakeholder engagement, community ownership.                                   |

|                                                                              |                                                                             |                                                                                                                                                                                                         |                                                         |                                                                                             |                                                                                                                                                                          |                                                                                                                                          |                                                                                                                                       |
|------------------------------------------------------------------------------|-----------------------------------------------------------------------------|---------------------------------------------------------------------------------------------------------------------------------------------------------------------------------------------------------|---------------------------------------------------------|---------------------------------------------------------------------------------------------|--------------------------------------------------------------------------------------------------------------------------------------------------------------------------|------------------------------------------------------------------------------------------------------------------------------------------|---------------------------------------------------------------------------------------------------------------------------------------|
|                                                                              |                                                                             | women and child health.                                                                                                                                                                                 |                                                         |                                                                                             |                                                                                                                                                                          |                                                                                                                                          |                                                                                                                                       |
| Maternal, Newborn and Child Health Programme <sup>46</sup> (2016)<br>Nigeria | Jigawa, Kano, Kaduna, Katsina, Yobe, Zamfara (NW, NE) rural health facility | Program outcome evaluation:<br>To assess outcome of an intervention increasing the uptake of long-acting reversible contraception services in primary Health centres through Competency-based Training. | Integrated Competency Based Training for health workers | Pre-pregnancy<br><br>Women of childbearing age                                              | 851 health care providers have been trained in the integrated package of reproductive, maternal, newborn and child health (RMNCH), including LARC services.              | Yes.                                                                                                                                     | Facilitators: Demand creation activities, good commodity supply chain.                                                                |
| Abegunde et al <sup>47</sup> (2015)<br>Nigeria                               | Sokoto (NW). urban and rural community and health facility                  | Program evaluation-outcome:<br>To assess the impact of interventions implemented between 2012 and 2013.                                                                                                 | Integrated management of (MNCH)/FP/reproductive health* | Across the continuum of care<br><br>women, newborns and children under 5yrs of age          | None of the nine indicators associated with the continuum of maternal, neonatal, and childcare satisfied the recommended 90% coverage target for achieving MDGs 4 and 5. | No: The majority of the LGAs did not meet intended targets and require intensified program/intervention.                                 | Barriers: Low quality data for planning the program.                                                                                  |
| Mckaig et al <sup>48</sup> (2009)<br>International                           | Kano (NW) urban and rural community and health facility                     | Program outcome evaluation (qualitative study):<br>To examine integrated MNCH/FP services as a means towards meeting the family planning                                                                | Scale-up of postpartum family planning*                 | Across the continuum of care<br><br>policymakers, health care providers, community members. | Significant increases in number of FP clients and method use per site following the implementation of the program.                                                       | Yes: The approach systematically increases MNCH/FP integration and had a positive effect on service use, particularly FP, even in a very | Barriers: Negative religious/community attitudes towards MNCH services.<br><br>Facilitators: Service integration, community linkages. |



|                                                  |                                                           |                                                                                                                                                                                             |                                                                                                          |                                                                             |                                                                                                                                                                                                                                                                                                                                             |                                                                                                                                                                       |  |
|--------------------------------------------------|-----------------------------------------------------------|---------------------------------------------------------------------------------------------------------------------------------------------------------------------------------------------|----------------------------------------------------------------------------------------------------------|-----------------------------------------------------------------------------|---------------------------------------------------------------------------------------------------------------------------------------------------------------------------------------------------------------------------------------------------------------------------------------------------------------------------------------------|-----------------------------------------------------------------------------------------------------------------------------------------------------------------------|--|
|                                                  |                                                           | and reproductive health needs of women in the postpartum period.                                                                                                                            |                                                                                                          |                                                                             |                                                                                                                                                                                                                                                                                                                                             | conservative environment.                                                                                                                                             |  |
| Kana et al <sup>49</sup> (2015)<br>Nigeria       | countrywide urban and rural health facility and community | Systematic review:<br>To describe and indirectly measure the effect of the Maternal, Newborn and Child Health (MNCH) interventions implemented in Nigeria from 1990 to 2014                 | Interventions for maternal and child health                                                              | Across the continuum of care<br><br>mothers, newborns, under-five children. | The national MMR shows a consistent reduction (Annual Percentage Change (APC) = -3.10%, 95% CI: -5.20 to -1.00 %) with marked decrease in the slope observed in the period with a cluster of published studies (2004–2014).                                                                                                                 | Yes: The development of MNCH policies, implementation and publication of interventions corresponds with the downward trend of maternal and child mortality in Nigeria |  |
| Abdul-Hadi et al <sup>50</sup> (2013)<br>Nigeria | Gombe (NE) rural community                                | Intervention assessment (quasi-experimental design):<br>To demonstrate effectiveness of Community Based Distribution of Injectable Contraceptives Using Community Health Extension Workers. | Community based distribution (CBD)of injectable contraceptives using community health extension workers* | Pre-pregnancy                                                               | The CBD mean couple years of protection (CYP) for injectables-depomedroxy-progesterone acetate (DMPA) and norethisterone enantate was higher (27.72 & 18.16 respectively) than the facility CYP (7.21 & 5.08 respectively) (p < 0.05) with no injection related complications. The CBD's mean CYP for all methods was also found to be four | Yes: Community based distribution of contraceptives was successful.                                                                                                   |  |

1  
2  
3  
4  
5  
6  
7  
8  
9  
10  
11  
12  
13  
14  
15  
16  
17  
18  
19  
20  
21  
22  
23  
24  
25  
26  
27  
28  
29  
30  
31  
32  
33  
34  
35  
36  
37  
38  
39  
40  
41  
42  
43  
44  
45  
46  
47

|                                                       |                                                                           |                                                                                                                                                                                                                                                                                             |                                                                                       |                                                           |                                                                                                                                                                                                                                                                                                                                                                           |                                                                                                                                                                                                    |                                                                  |
|-------------------------------------------------------|---------------------------------------------------------------------------|---------------------------------------------------------------------------------------------------------------------------------------------------------------------------------------------------------------------------------------------------------------------------------------------|---------------------------------------------------------------------------------------|-----------------------------------------------------------|---------------------------------------------------------------------------------------------------------------------------------------------------------------------------------------------------------------------------------------------------------------------------------------------------------------------------------------------------------------------------|----------------------------------------------------------------------------------------------------------------------------------------------------------------------------------------------------|------------------------------------------------------------------|
|                                                       |                                                                           |                                                                                                                                                                                                                                                                                             |                                                                                       |                                                           | times higher (11.65) than that generated in health facilities (2.86) (p < 0.05)                                                                                                                                                                                                                                                                                           |                                                                                                                                                                                                    |                                                                  |
| Speizer et al <sup>51</sup> (2014)<br>International   | Kaduna, Abuja-FCT, Kwara, Oyo and Edo (NC, NW, SS and SW) urban community | Longitudinal evaluation of program/intervention: To examine the role of demand generation activities undertaken as part of the Urban RH Initiative programs-seeking to increase modern contraceptive use by 20 percentage points in targeted urban areas, particularly among the urban poor | Family planning demand creation and supply side interventions.*                       | Pre-pregnancy<br>Women of childbearing age (15-49 years)  | Outreach by community health or family planning workers as well as local radio programs was significantly associated with increased use of modern contraceptive methods. Television programs had a significant effect on modern contraceptive use. Program slogans and materials distributed across the cities were also significantly associated with modern method use. | Yes: Multi-level targeted demand generation activities contributed to increasing modern contraceptive use in urban areas, leading to improved access to maternal and reproductive health services. | Facilitators: community engagement.                              |
| Hotchkiss et al <sup>52</sup> (2011)<br>International | Countrywide urban and rural health facility                               | Post program evaluation-cross sectional study: To investigate whether the expansion of the role of private providers in the provision of modern contraceptive                                                                                                                               | Expansion of the private commercial sector in the provision of contraceptive supplies | Pre-pregnancy<br>Women of childbearing age (15-49 years). | Proportion of women who report obtaining the contraceptive supplies from the commercial private sector increased by 69 percent over the 1999 to 2008 period. In Nigeria, the private commercial sector became the most                                                                                                                                                    | Yes: The expansion of the private commercial sector supply of contraceptives decreased inequities in the use of modern contraceptives in Nigeria.                                                  | Facilitators: social marketing of intervention to create demand. |

|                                                     |                                                                    |                                                                                                                                                                                                      |                                                                                                                  |                                                    |                                                                                                                                                                                                                                                                                                                                          |                                                                                                                                                                                         |                                                                                                                                                                                                                                                                                                                                  |
|-----------------------------------------------------|--------------------------------------------------------------------|------------------------------------------------------------------------------------------------------------------------------------------------------------------------------------------------------|------------------------------------------------------------------------------------------------------------------|----------------------------------------------------|------------------------------------------------------------------------------------------------------------------------------------------------------------------------------------------------------------------------------------------------------------------------------------------------------------------------------------------|-----------------------------------------------------------------------------------------------------------------------------------------------------------------------------------------|----------------------------------------------------------------------------------------------------------------------------------------------------------------------------------------------------------------------------------------------------------------------------------------------------------------------------------|
|                                                     |                                                                    | supplies is associated with increased horizontal inequity in modern contraceptive use.                                                                                                               |                                                                                                                  |                                                    | important source of contraceptive supplies to women in poorest wealth quintile group. In addition, women in better off wealth quintiles also became increasingly reliant on the private commercial sector.                                                                                                                               |                                                                                                                                                                                         |                                                                                                                                                                                                                                                                                                                                  |
| Fayemi et al <sup>53</sup><br>(2011)<br><br>Nigeria | Bauchi, Gombe, Plateau, Edo, Ogun (NC, NE, SS, SW) rural community | Longitudinal evaluation of program/ intervention: To improve maternal mortality reduction through increasing contraceptive uptake in 10 rural local government areas (LGAs) in five Nigerian states. | Community Based Delivery (CBD) of non-prescriptive family planning services and the treatment of minor ailments* | Pregnancy Women of childbearing age (15-49 years). | Increase in the proportion of community members who had utilised FP commodities at all, from 28% at baseline to 49%, and an increase in the proportion of current contraceptive users from 16% at baseline to 37%. An increase in knowledge of common family planning methods, including male and female condoms, injectables and pills. | Yes: A community-based distribution approach played a critical role in enhancing access to Reproductive Health and Family Planning information and services in the project communities. | Barriers: Inadequate financial support for program, poor support from spouses of participating women, misconceptions of community members about family planning.<br><br>Facilitators: Advocacy and community engagement, involvement of males in implementation, demand creation activities, regular monitoring, and evaluation. |

|                                                     |                                                                                                                      |                                                                                                                                                                                                                                                 |                                                                                      |                                                                  |                                                                                                                                                                                                                                                                                                                                                                                                                                                                                                          |                                                                                                                                                               |                                                                                                                          |
|-----------------------------------------------------|----------------------------------------------------------------------------------------------------------------------|-------------------------------------------------------------------------------------------------------------------------------------------------------------------------------------------------------------------------------------------------|--------------------------------------------------------------------------------------|------------------------------------------------------------------|----------------------------------------------------------------------------------------------------------------------------------------------------------------------------------------------------------------------------------------------------------------------------------------------------------------------------------------------------------------------------------------------------------------------------------------------------------------------------------------------------------|---------------------------------------------------------------------------------------------------------------------------------------------------------------|--------------------------------------------------------------------------------------------------------------------------|
| <p>Ogu et al<sup>54</sup> (2012)</p> <p>Nigeria</p> | <p>Kaduna, Kano, Adamawa, Bauchi, Borno, Taraba, and Katsina, Niger (NC, NE, NW) rural and urban health facility</p> | <p>Pre/Post-intervention (quasi-experimental): To investigate the effectiveness of an intervention designed to improve the capacity of private medical doctors to offer quality abortion and postabortion care to women in northern Nigeria</p> | <p>Capacity-building workshops for health workers to improve post-abortion care.</p> | <p>Pregnancy</p> <p>Women of childbearing age (15-49 years).</p> | <p>458 trained private medical doctors and 839 nurses and midwives across 430 private clinics treated a total of 17,009 women over the 10 years of the project (about 2,100 women annually). Not a single case of abortion-related maternal mortality was recorded, with only 33 women experiencing mild complications, while none suffered major complications of abortion care. At the same time, there was a reduction in treatment cost and a doubling of the contraceptive uptake by the women.</p> | <p>Yes: Building the capacity of private medical providers reduced maternal morbidity and mortality associated with induced abortion in northern Nigeria.</p> | <p>Facilitators: detailed community needs assessment, community engagement, culturally appropriate health education.</p> |
|-----------------------------------------------------|----------------------------------------------------------------------------------------------------------------------|-------------------------------------------------------------------------------------------------------------------------------------------------------------------------------------------------------------------------------------------------|--------------------------------------------------------------------------------------|------------------------------------------------------------------|----------------------------------------------------------------------------------------------------------------------------------------------------------------------------------------------------------------------------------------------------------------------------------------------------------------------------------------------------------------------------------------------------------------------------------------------------------------------------------------------------------|---------------------------------------------------------------------------------------------------------------------------------------------------------------|--------------------------------------------------------------------------------------------------------------------------|

|                                                              |                                                           |                                                                                                                                                                                                       |                                                                                                   |                                                                |                                                                                                                                                                                                                                                                                                                     |                                                                                                                                                                                                                     |  |
|--------------------------------------------------------------|-----------------------------------------------------------|-------------------------------------------------------------------------------------------------------------------------------------------------------------------------------------------------------|---------------------------------------------------------------------------------------------------|----------------------------------------------------------------|---------------------------------------------------------------------------------------------------------------------------------------------------------------------------------------------------------------------------------------------------------------------------------------------------------------------|---------------------------------------------------------------------------------------------------------------------------------------------------------------------------------------------------------------------|--|
| <p>Mens et al<sup>55</sup> (2011)</p> <p>International</p>   | <p>Edo (SS) rural community</p>                           | <p>Pre/Post-intervention evaluation: Explore peer to peer education as a tool in raising knowledge of MIP among women of childbearing age and preventive practices.</p>                               | <p>Peer led health education campaign to address malaria in pregnancy*.</p>                       | <p>Pregnancy</p> <p>Women of childbearing age: 15-49 years</p> | <p>The peer education campaign had a significant impact in raising the level of knowledge among the women.</p>                                                                                                                                                                                                      | <p>Yes: The knowledge of women of childbearing age on malaria in pregnancy and its preventive measures increased.</p>                                                                                               |  |
| <p>McNabb et al<sup>56</sup> (2015)</p> <p>International</p> | <p>Abuja-FCT and Nassarawa (NC) urban health facility</p> | <p>Pre/post intervention assessment: To determine if introducing the mobile app: 1) improved the quality of ANC services provided, and 2) improved client satisfaction with ANC services provided</p> | <p>An m-health technology intervention for CHEWs/HCWs to provide higher-quality ANC services*</p> | <p>Pregnancy</p> <p>Pregnant women</p>                         | <p>Overall, the intervention was associated with higher quality of ANC scores, with these improvements observed in multiple domains of care, including health counselling, technical services provided, and quality of health education. A significant improvement in overall client satisfaction was observed.</p> | <p>Yes: Introduction of a low-cost mobile case management and decision support application led to behaviour changes and improved the quality of services provided by a lower-level cadre of healthcare workers.</p> |  |

|                                                                                                                                           |                                                      |                                                  |                                                                                                                                                                                                                                                                                         |                                                                                                                                                                                                          |                                                                                                                   |                                                                                                                                                                                                                                                                                                                                  |                                                                                                                                                                                                                                                                                                                                                                                                   |
|-------------------------------------------------------------------------------------------------------------------------------------------|------------------------------------------------------|--------------------------------------------------|-----------------------------------------------------------------------------------------------------------------------------------------------------------------------------------------------------------------------------------------------------------------------------------------|----------------------------------------------------------------------------------------------------------------------------------------------------------------------------------------------------------|-------------------------------------------------------------------------------------------------------------------|----------------------------------------------------------------------------------------------------------------------------------------------------------------------------------------------------------------------------------------------------------------------------------------------------------------------------------|---------------------------------------------------------------------------------------------------------------------------------------------------------------------------------------------------------------------------------------------------------------------------------------------------------------------------------------------------------------------------------------------------|
| 1<br>2<br>3<br>4<br>5<br>6<br>7<br>8<br>9<br>10<br>11<br>12<br>13<br>14<br>15<br>16<br>17<br>18<br>19<br>20<br>21<br>22<br>23<br>24<br>25 | Anyaehe et al <sup>57</sup><br>(2011)<br><br>Nigeria | Imo (SE)<br>rural<br>community                   | Longitudinal<br>evaluation of<br>program/intervent<br>ion:<br>To assess the<br>impact of free<br>distribution of<br>ITN to pregnant<br>and nursing<br>mothers in a rural<br>community in<br>Nigeria, using<br>asymptomatic<br>malaria<br>parasitaemia as<br>the main outcome<br>measure | Roll Back Malaria<br>Campaign:<br>increased<br>availability of<br>ITNs for free<br>distribution to<br>pregnant women<br>and children<br>under at antenatal,<br>postnatal and<br>immunization<br>clinics* | Pregnancy and<br>postnatal<br>(mother and<br>newborn)<br><br>pregnant<br>women/nursing<br>mothers and<br>newborns | There was a sustained<br>but insignificant rise<br>in asymptomatic<br>malaria parasitaemia<br>post-distribution of<br>ITNs. Out of the 990<br>subjects recruited, 470<br>tested positive with<br>asymptomatic malaria<br>parasitaemia.                                                                                           | No: Although<br>ITN has a<br>capacity to reduce<br>mosquito bites<br>and malaria<br>prevalence, our<br>study showed a<br>non-significant<br>increase in<br>prevalence of<br>malaria after 6<br>months use in a<br>rural agrarian<br>Nigerian<br>community. This<br>suggests ITN<br>intervention must<br>be complemented<br>with awareness<br>campaigns and<br>other vector<br>control strategies. |
| 26<br>27<br>28<br>29<br>30<br>31<br>32<br>33<br>34<br>35<br>36<br>37<br>38<br>39<br>40<br>41<br>42<br>43<br>44<br>45<br>46<br>47          | Kabo et al <sup>58</sup><br>(2016)<br><br>Nigeria    | Bauchi State<br>(NE)<br>urban<br>health facility | Program<br>evaluation-<br>process and<br>outcome:<br>To assess whether<br>increased<br>compliance with<br>set performance<br>standards was<br>associated with<br>improved<br>maternal and<br>neonatal<br>outcomes                                                                       | Standards-Based<br>Management and<br>Recognition<br>(SBM-R)<br>program                                                                                                                                   | Across the<br>continuum of<br>care<br>Health service<br>providers                                                 | An increase in the<br>percentage of SBM-R<br>standards for MNH<br>achieved was<br>observed for 3 years<br>in succession after the<br>implementation of<br>SBM-R at all 23<br>facilities. In addition,<br>a decline in MMR and<br>NMR observed, along<br>with an increase in the<br>active management of<br>third stage of labour | Yes: Intervention<br>helped health<br>facilities achieve<br>more compliance<br>with MNH quality<br>of care<br>performance<br>standards, the use<br>of evidence-based<br>delivery practices<br>increased, leading<br>to decreases in<br>maternal and                                                                                                                                               |

|                                                 |                                                     |                                                                                                                                                                                                                                                                                        |                                                                                        |                                                         |                                                                                                                                                                                                                                                    |                                                                                                                                                                                |                                                                                                                                                             |
|-------------------------------------------------|-----------------------------------------------------|----------------------------------------------------------------------------------------------------------------------------------------------------------------------------------------------------------------------------------------------------------------------------------------|----------------------------------------------------------------------------------------|---------------------------------------------------------|----------------------------------------------------------------------------------------------------------------------------------------------------------------------------------------------------------------------------------------------------|--------------------------------------------------------------------------------------------------------------------------------------------------------------------------------|-------------------------------------------------------------------------------------------------------------------------------------------------------------|
|                                                 |                                                     |                                                                                                                                                                                                                                                                                        |                                                                                        |                                                         | and a decline in the incidence of postpartum haemorrhage.                                                                                                                                                                                          | neonatal mortality.                                                                                                                                                            |                                                                                                                                                             |
| Chabikuli et al <sup>59</sup> (2009)<br>Nigeria | 71 health facilities across Nigeria urban and rural | Pre/post evaluation of program: To measure changes in service utilization of a model integrating family planning with HIV counselling and testing (HCT), antiretroviral therapy (ART) and prevention of mother-to-child transmission (PMTCT) in the Nigerian public health facilities. | a referral-based, co-located family planning-HIV integration model                     | Pregnancy<br><br>Women of childbearing age: 15-49 years | Attendance at family planning clinics and mean couple year of protection increased significantly following integration of services. Attendance by men at family planning clinics was significantly higher among clients referred from HIV clinics. | Yes: Family planning-HIV integration using the referral model improved family planning service utilization by clients accessing HIV services due to increased referrals.       | Barriers: Low utilisation of intervention due to user fees, long waiting times.<br><br>Facilitators: decentralisation of services, integration of programs. |
| Kalu et al <sup>60</sup> (2012)<br>Nigeria      | Ebonyi (SE) urban health facility                   | Post-intervention evaluation: To review the implementation of Post Abortion Care and effective linkage to other post abortion services in Ebonyi State University Teaching Hospital,                                                                                                   | Provision of post-abortion care and effective linkage to other post abortion services* | Pregnancy<br><br>Health service providers               | About a third of the PAC care providers had formal training for the implementation of the PAC services. The commonest intervention offered the patients was Manual Vacuum Aspiration (MVA). Only 15% of the caregivers were                        | No: There is poor integration between emergency post abortion care and other reproductive health services in the centre, resulting in high rates of maternal mortality related |                                                                                                                                                             |

|                                                           |                                                         |                                                                                                                                                                                                            |                                                                                      |                                  |                                                                                                                                                                                                                            |                                                                                                                                                                                                               |                                                             |
|-----------------------------------------------------------|---------------------------------------------------------|------------------------------------------------------------------------------------------------------------------------------------------------------------------------------------------------------------|--------------------------------------------------------------------------------------|----------------------------------|----------------------------------------------------------------------------------------------------------------------------------------------------------------------------------------------------------------------------|---------------------------------------------------------------------------------------------------------------------------------------------------------------------------------------------------------------|-------------------------------------------------------------|
|                                                           |                                                         | Abakaliki,<br>Nigeria                                                                                                                                                                                      |                                                                                      |                                  | satisfied with the linkage between PAC and the Family Planning services.                                                                                                                                                   | to abortion complications.                                                                                                                                                                                    |                                                             |
| Joseph et al <sup>61</sup><br>(2011)<br><br>International | Edo (SS)<br>urban<br>health facility                    | Cohort study:<br>To assess adverse pregnancy outcomes in HIV infected women who received highly active antiretroviral therapy (HAART) from early pregnancy compared with untreated-maternal HIV infection. | Administration of highly active antiretroviral therapy (HAART) from early pregnancy* | Pregnancy<br><br>Pregnant women  | Intrauterine growth restriction (IUGR), pre-term birth and caesarean delivery were significantly higher among women with untreated-HIV infection in pregnancy compared with women who received HAART from early pregnancy. | Yes: Provision of HAART significantly reduces adverse pregnancy outcomes.                                                                                                                                     |                                                             |
| Ojengbede et al <sup>62</sup><br>(2010)<br><br>Nigeria    | Kano, Katsina, Oyo (NW, SW)<br>urban<br>health facility | Pre/post intervention evaluation:<br>To examine the impact of the NASG on PPH at four referral facilities in Nigeria                                                                                       | Provision of non-pneumatic anti-shock garment (NASG) for PPH.*                       | Childbirth<br><br>Pregnant women | Mean measured blood loss decreased by 80% between pre-intervention and post-intervention phases. Mortality decreased from 18% pre-intervention to 6% in the NASG phase (RR = 0.31, 95% CI 0.15–0.64, p = 0.0007).          | Yes: The use of the NASG as part of standard management of PPH and hypovolemic shock at four referral facilities in Nigeria was associated with a significant reduction in blood loss and maternal mortality. | Facilitators: Frequent training, monitoring and evaluation. |



|                                                                                                                                                                                                                                                                           |                                                          |                                                                                                                                                                                                                                                                                                                                           |                                                                                                                            |                                                                                                                           |                                                                                                                                                                                                                                                                                                                                                                     |                                                                                                                                                                                                                   |                                                                                                       |
|---------------------------------------------------------------------------------------------------------------------------------------------------------------------------------------------------------------------------------------------------------------------------|----------------------------------------------------------|-------------------------------------------------------------------------------------------------------------------------------------------------------------------------------------------------------------------------------------------------------------------------------------------------------------------------------------------|----------------------------------------------------------------------------------------------------------------------------|---------------------------------------------------------------------------------------------------------------------------|---------------------------------------------------------------------------------------------------------------------------------------------------------------------------------------------------------------------------------------------------------------------------------------------------------------------------------------------------------------------|-------------------------------------------------------------------------------------------------------------------------------------------------------------------------------------------------------------------|-------------------------------------------------------------------------------------------------------|
| <p>1<br/>2<br/>3<br/>4<br/>5<br/>6<br/>7<br/>8<br/>9<br/>10<br/>11<br/>12<br/>13<br/>14<br/>15<br/>16<br/>17<br/>18</p> <p>Chiwuzie et al<sup>63</sup><br/>(1997)<br/><br/>Nigeria</p>                                                                                    | <p>Edo (SS)<br/>rural<br/>community</p>                  | <p>Program<br/>evaluation (quasi-<br/>experimental<br/>design):<br/>To evaluate a<br/>community<br/>intervention<br/>designed to<br/>increase access to<br/>emergency<br/>obstetric care<br/>qualitative<br/>methods used</p>                                                                                                             | <p>Emergency loan<br/>funds to improve<br/>access to obstetric<br/>care</p>                                                | <p>Pregnancy<br/><br/>Women of<br/>childbearing<br/>age: 15-49<br/>years<br/>community<br/>leaders<br/>health workers</p> | <p>Of the 13 clans<br/>contacted, 12<br/>successfully launched<br/>loan funds. In the 1st<br/>year of the operation,<br/>83% of loans<br/>requested by<br/>women/families were<br/>granted and 93% loans<br/>were repaid in full. In<br/>addition to being used<br/>for transport, loans<br/>were used to help pay<br/>for drugs, blood, and<br/>hospital fees.</p> | <p>Yes: The loan<br/>fund improved<br/>access and<br/>reduced delay in<br/>reaching care.</p>                                                                                                                     | <p>Facilitators:<br/>community<br/>involvement, quality<br/>improvement of<br/>health facilities.</p> |
| <p>19<br/>20<br/>21<br/>22<br/>23<br/>24<br/>25<br/>26<br/>27<br/>28<br/>29<br/>30<br/>31<br/>32<br/>33<br/>34<br/>35<br/>36<br/>37<br/>38<br/>39<br/>40<br/>41<br/>42<br/>43<br/>44<br/>45<br/>46<br/>47</p> <p>Tukur et al<sup>64</sup><br/>(2012)<br/><br/>Nigeria</p> | <p>Kano (NW)<br/>urban and rural<br/>health facility</p> | <p>Evaluation of<br/>program (quasi-<br/>experimental):<br/>To evaluate<br/>whether a new<br/>low-cost strategy<br/>for the<br/>introduction of<br/>magnesium<br/>sulphate<br/>(MgSO4) for<br/>preeclampsia and<br/>eclampsia in low-<br/>resource areas<br/>will result in<br/>improved<br/>maternal and<br/>perinatal<br/>outcomes.</p> | <p>Training on the<br/>use of MgSO4 for<br/>severe pre-<br/>eclampsia and<br/>eclampsia in low-<br/>resource settings*</p> | <p>Pregnancy<br/><br/>Pregnant<br/>women</p>                                                                              | <p>1,045 patients with<br/>severe preeclampsia<br/>and eclampsia were<br/>treated. The case<br/>fatality rate for severe<br/>pre- eclampsia and<br/>eclampsia fell from<br/>20.9 % (95 % CI<br/>18.7–23.2) to 2.3 %<br/>(95 % CI 1.5–3.5).<br/>The perinatal<br/>mortality rate was<br/>12.3% compared to<br/>35.3 % in a centre<br/>using diazepam.</p>            | <p>Yes: Introduction<br/>of MgSO4 in low-<br/>resource settings<br/>led to improved<br/>maternal and<br/>foetal outcomes in<br/>patients<br/>presenting with<br/>severe pre-<br/>eclampsia and<br/>eclampsia.</p> | <p>Barriers: health<br/>workers resistance to<br/>change.</p>                                         |

|                                                                                                                                                                         |                                                          |                                       |                                                                                                                                                                                                                                                        |                                                                                                                                                  |                                                   |                                                                                                                                                                                                                                                                                                                                                                                                                                                                                                                                             |                                                                                                                                                                              |                                                                                                                                                                                                                                                                                   |
|-------------------------------------------------------------------------------------------------------------------------------------------------------------------------|----------------------------------------------------------|---------------------------------------|--------------------------------------------------------------------------------------------------------------------------------------------------------------------------------------------------------------------------------------------------------|--------------------------------------------------------------------------------------------------------------------------------------------------|---------------------------------------------------|---------------------------------------------------------------------------------------------------------------------------------------------------------------------------------------------------------------------------------------------------------------------------------------------------------------------------------------------------------------------------------------------------------------------------------------------------------------------------------------------------------------------------------------------|------------------------------------------------------------------------------------------------------------------------------------------------------------------------------|-----------------------------------------------------------------------------------------------------------------------------------------------------------------------------------------------------------------------------------------------------------------------------------|
| 1<br>2<br>3<br>4<br>5<br>6<br>7<br>8<br>9<br>10<br>11<br>12<br>13<br>14<br>15<br>16<br>17<br>18<br>19<br>20<br>21<br>22<br>23<br>24<br>25<br>26<br>27<br>28<br>29<br>30 | Prata et al <sup>65</sup><br>(2012)<br><br>International | Kaduna (NW)<br>urban<br>community     | Before -after<br>analysis (quasi-<br>experimental):<br>To demonstrate<br>the role of<br>community<br>mobilization<br>efforts and<br>examine the<br>safety and<br>feasibility of<br>misoprostol<br>distribution for<br>use in home births<br>in Nigeria | Birth<br>preparedness and<br>the prevention of<br>postpartum<br>haemorrhage<br>through<br>prophylactic use<br>of misoprostol in<br>home births*. | Pregnancy/chil<br>dbirth<br><br>Pregnant<br>women | Community<br>mobilization efforts<br>using TBAs, and<br>CORPs reached most<br>women with<br>information about<br>postpartum<br>haemorrhage and<br>misoprostol (88%).<br>Availability of<br>misoprostol at the<br>community level gave<br>over 70% of enrolled<br>women protection<br>against postpartum<br>haemorrhage. Many<br>women demonstrated<br>an understanding of<br>the threshold for<br>postpartum<br>haemorrhage, the risk<br>of death from this<br>disease, and the role<br>of misoprostol in<br>preventing and<br>treating it. | Yes: Community<br>mobilization had<br>a significant<br>impact on the<br>successful<br>distribution and<br>uptake of a<br>potentially life-<br>saving health<br>intervention. | Barriers: poor<br>diffusion/<br>understanding of<br>health messages led<br>to reluctance to<br>participate in<br>intervention.<br><br>Facilitators:<br>community<br>participation, use of<br>culturally appropriate<br>terms to disseminate<br>information about<br>intervention. |
| 31<br>32<br>33<br>34<br>35<br>36<br>37<br>38<br>39<br>40<br>41<br>42<br>43<br>44<br>45<br>46<br>47                                                                      | Hunyinbo et<br>al <sup>66</sup><br>(2008)<br><br>Nigeria | Ogun (SW)<br>urban<br>health facility | Pre/post<br>evaluation of<br>hospital-based<br>intervention:<br>To evaluate the<br>use of criteria-<br>based audits in<br>improving the<br>quality of<br>hospital-based                                                                                | Clinical/practice<br>guidelines for<br>optimal<br>management of<br>obstetric<br>complications*                                                   | Childbirth<br><br>Pregnant<br>women               | Overall, management<br>of complications such<br>obstetric<br>haemorrhage,<br>eclampsia, obstructed<br>labour, and genital<br>sepsis improved<br>significantly. Clinical<br>monitoring, drug use,<br>and urgent attention                                                                                                                                                                                                                                                                                                                    | Yes: Criteria-<br>based clinical<br>audit was feasible<br>and acceptable<br>strategy for<br>improving<br>management of<br>life-threatening<br>obstetric<br>complications.    | Barriers: Insufficient<br>supply of essential<br>commodities, low<br>morale of the staff.                                                                                                                                                                                         |

|                                                    |                                                                                               |                                                                                                                                                                                |                                                               |                                 |                                                                                                                                                                                                                                                                                                                                            |                                                                                                                                                                                                                                      |                                                                                                                                                           |
|----------------------------------------------------|-----------------------------------------------------------------------------------------------|--------------------------------------------------------------------------------------------------------------------------------------------------------------------------------|---------------------------------------------------------------|---------------------------------|--------------------------------------------------------------------------------------------------------------------------------------------------------------------------------------------------------------------------------------------------------------------------------------------------------------------------------------------|--------------------------------------------------------------------------------------------------------------------------------------------------------------------------------------------------------------------------------------|-----------------------------------------------------------------------------------------------------------------------------------------------------------|
|                                                    |                                                                                               | obstetric care services at the Federal Medical Centre, Abeokuta, Nigeria.                                                                                                      |                                                               |                                 | by senior medical staff also improved significantly after intervention.                                                                                                                                                                                                                                                                    |                                                                                                                                                                                                                                      |                                                                                                                                                           |
| Okonofua et al <sup>67</sup> (2013)<br><br>Nigeria | Kano, Lagos, CrossRivers, Plateau, Borno and Enugu (NW, SW, SS, NE, SE) urban health facility | Pre/Post-intervention (multi-centre) study:<br>To investigate the effectiveness of an intervention aimed at improving the case management of eclampsia                         | Health worker training to improve management of pre-eclampsia | Pregnancy<br><br>Pregnant women | The post intervention case fatality rate of 3.2 % was significantly less than the pre-intervention rate of 15.1 % (p < 0.001). The overall maternal and perinatal mortality ratios and rates respectively in the hospitals declined from 1199.2 to 954 per 100,000 deliveries and 141.5 to 129.8 per 1000 births, respectively (p > 0.05). | Yes: An intervention to build the capacity of care-providers to use an evidence-based protocol for the treatment of eclampsia in Nigeria was successful in reducing associated case fatality rate, maternal and perinatal mortality. | Barriers: Difficulties in supply of commodities.<br><br>Facilitators: training and retraining of health providers, monitoring, advocacy to policy makers. |
| Igwegbe et al <sup>68</sup> (2012)<br><br>Nigeria  | Anambra (SE) urban health facility                                                            | Impact evaluation:<br>To evaluate the impact of the introduction of the Service Compact with all Nigerians (SERVICOM) contract on maternal health at Nnamdi Azikiwe University | Improve quality of health services through SERVICOM.          | Pregnancy<br><br>Pregnant women | There was a progressive reduction in MMR and relative risk of maternal mortality, with a corresponding increase in live births. The presentation-intervention interval improved significantly from 2006. This measure significantly reduced type 3 delays                                                                                  | Yes: The resolution by the staff and management to change attitudes and service delivery according to the tenets of SERVICOM led to a gradual and consistent improvement in                                                          |                                                                                                                                                           |

|                                                    |                                                                                               |                                                                                                                                                                                                                    |                                                                       |                                                    |                                                                                                                                                                                                                              |                                                                                                                                                                                    |                                                                                                                        |
|----------------------------------------------------|-----------------------------------------------------------------------------------------------|--------------------------------------------------------------------------------------------------------------------------------------------------------------------------------------------------------------------|-----------------------------------------------------------------------|----------------------------------------------------|------------------------------------------------------------------------------------------------------------------------------------------------------------------------------------------------------------------------------|------------------------------------------------------------------------------------------------------------------------------------------------------------------------------------|------------------------------------------------------------------------------------------------------------------------|
|                                                    |                                                                                               | Teaching Hospital, Nnewi, Nigeria.                                                                                                                                                                                 |                                                                       |                                                    | from 2006, and consequently improved maternal mortality. Overall, MMR of 1098 per 100 000 live births in 2004 declined to 691 per 100,000 in 2010.                                                                           | all service points within the hospital. This measure significantly reduced the delays to treatment and led to reductions in maternal mortality.                                    |                                                                                                                        |
| Singh et al <sup>69</sup> (2017).<br>International | All geopolitical zones (NE, NW, NC, SS, SE, SW) urban and rural community and health facility | Observational (Retrospective cohort analysis): To assess the level of practice of SSC in Nigeria and determine whether it is associated with early initiation of breastfeeding i.e., within the first hour of life | skin to skin contact*                                                 | Postnatal (newborn) newborns                       | Only about 10% of mothers reported babies receiving (skin-skin contact) SSC. Newborns who were perceived to be large at birth were significantly more likely to experience SSC than smaller newborns.                        | No: Coverage of SSC remained low despite known benefits for newborns without complications.                                                                                        | Facilitators: availability of skilled workers are health facilities, equitable diffusion of maternal health knowledge. |
| Galadanci et al <sup>70</sup> (2011)<br>Nigeria    | Kano and Kaduna (NW) rural health facility                                                    | Program evaluation (process and outcome): To assess the 2-year results of an ongoing total quality assurance project in 10 Nigerian hospitals in a rural setting, and their impact                                 | Quality assurance project to improve maternal and neonatal mortality. | Across the continuum of care<br><br>Pregnant women | The mean maternal mortality ratio (MMR) was reduced from 1790 per 100,000 births in the first half of 2008 to 940 per 100 000 births in the second half of 2009. The average foetal mortality ratio (FMR) decreased slightly | Yes: Continuous monitoring of quality assurance in maternity units raised the awareness of the quality of obstetric performance and improved the quality of care provided, thereby |                                                                                                                        |

|                                                        |                                    |                                                                                                                                                        |                                                                                              |                                                                                                |                                                                                                                                                                                                                                                                                                                                                                                                      |                                                                                                                                                                                                                                  |                                                                                                      |
|--------------------------------------------------------|------------------------------------|--------------------------------------------------------------------------------------------------------------------------------------------------------|----------------------------------------------------------------------------------------------|------------------------------------------------------------------------------------------------|------------------------------------------------------------------------------------------------------------------------------------------------------------------------------------------------------------------------------------------------------------------------------------------------------------------------------------------------------------------------------------------------------|----------------------------------------------------------------------------------------------------------------------------------------------------------------------------------------------------------------------------------|------------------------------------------------------------------------------------------------------|
|                                                        |                                    | on the MMR and foetal mortality ratio (FMR) in these hospitals from 2008 to 2009.                                                                      |                                                                                              |                                                                                                | from 84.9 to 83.5 per 1000 births.                                                                                                                                                                                                                                                                                                                                                                   | improving MMR and FMR.                                                                                                                                                                                                           |                                                                                                      |
| Gummi et al <sup>71</sup> (1997)                       | Kebbi (NW) rural community         | Pre-post intervention assessment: To assess the effect of community education interventions to encourage utilization of emergency obstetric facilities | Community education intervention to increase knowledge and utilisation of health facilities* | Across the continuum of care<br><br>Women of childbearing age<br>husbands<br>community leaders | A post-intervention mini survey showed knowledge gains of over 30% on awareness of the causes of maternal death, nature of obstructed labour, signs of pre-eclampsia, need for prompt treatment, and importance of delaying marriage. The increase was greatest on the need for prompt care for women with obstetric complications. The case fatality rate declined from 38 % in 1991 to 5% in 1995. | No: Increased awareness of the signs of obstetric complications and the need for prompt treatment among community women and men did not result in greater utilization of emergency obstetric services at the facilities studied. | Barriers: Needing husband's permission to participate, higher costs of emergency obstetric services. |
| Miller et al <sup>72</sup> (2009)<br><br>International | Katsina (NW) urban health facility | Intervention assessment (quasi-experimental): To determine whether the non-pneumatic anti-shock garment (NASG) can                                     | Non-pneumatic anti-shock garment (NASG) for obstetric haemorrhage*                           | Childbirth<br><br>Pregnant women                                                               | Mean measured blood loss in the intervention phase was 73.5±93.9mL, compared with 340.4±248.2 mL pre-intervention (P<0.001). Maternal mortality was lower in the intervention phase                                                                                                                                                                                                                  | Yes: The NASG showed potential for reducing blood loss and maternal mortality caused by obstetric haemorrhage-related shock.                                                                                                     | Barriers: Limited access to services.                                                                |

|                                                |                           |                                                                                                                                                                                                                |                                                                                                           |                                                                   |                                                                                                                                                                                                                                                                                                            |                                                                                                                                                            |  |
|------------------------------------------------|---------------------------|----------------------------------------------------------------------------------------------------------------------------------------------------------------------------------------------------------------|-----------------------------------------------------------------------------------------------------------|-------------------------------------------------------------------|------------------------------------------------------------------------------------------------------------------------------------------------------------------------------------------------------------------------------------------------------------------------------------------------------------|------------------------------------------------------------------------------------------------------------------------------------------------------------|--|
|                                                |                           | improve maternal outcomes.                                                                                                                                                                                     |                                                                                                           |                                                                   | than in the pre-intervention phase (7 [8.1%]) vs 21 [25.3%] (RR 0.32; 95% CI, 0.14 –0.72).                                                                                                                                                                                                                 |                                                                                                                                                            |  |
| Odusanya et al <sup>73</sup> (2003)<br>Nigeria | Edo (SS) rural community  | Pre-post program evaluation:<br>To compare vaccination coverage obtained at the baseline and post-intervention.                                                                                                | Privately financed immunization program to increase immunization coverage in a rural community*           | Postnatal (newborn)<br><br>newborns children up to 2 years of age | Two years after the program was started, immunization coverage rates were 94% for BCG, 88% for DTP (third dose), and 82% for measles. 84% percent of children were fully immunized against all six diseases, compared with 43% at the commencement (p<0.0001). Hepatitis-B coverage (three doses) was 58%. | Yes: The vaccination program has significantly improved vaccination coverage.                                                                              |  |
| Amoran et al <sup>74</sup> (2013)<br>Nigeria   | Ogun (SW) rural community | Intervention evaluation (quasi-experimental):<br>To determine the effect of malaria education programme on the uptake of insecticide-treated nets (ITN) among nursing mothers in rural communities in Nigeria. | Health education intervention on malaria prevention practices among nursing mothers in rural communities* | Pregnancy<br><br>Nursing mothers                                  | Knowledge of indoor spraying increased from 14.7% to 58.2% (P < 0.001) and use of window and door nets increased from 48.3% to 74.8% (P < 0.001). The proportion of those with ITN use increased from 50.8% to 87.4% (P < 0.001) while those with practice of maintaining clean                            | Yes: Malaria control significantly improved in rural areas, as the caregivers were adequately empowered through appropriate health education intervention. |  |

1  
2  
3  
4  
5  
6  
7  
8  
9  
10  
11  
12  
13  
14  
15  
16  
17  
18  
19  
20  
21  
22  
23  
24  
25  
26  
27  
28  
29  
30  
31  
32  
33  
34  
35  
36  
37  
38  
39  
40  
41  
42  
43  
44  
45  
46  
47

|                                                    |                                                             |                                                                                                                                                                                           |                                                          |                                                   |                                                                                                                                                                                                                                                                                                                                                                                                                                                |                                                                                                                                                     |                                                                                                                                                                                                                                                   |
|----------------------------------------------------|-------------------------------------------------------------|-------------------------------------------------------------------------------------------------------------------------------------------------------------------------------------------|----------------------------------------------------------|---------------------------------------------------|------------------------------------------------------------------------------------------------------------------------------------------------------------------------------------------------------------------------------------------------------------------------------------------------------------------------------------------------------------------------------------------------------------------------------------------------|-----------------------------------------------------------------------------------------------------------------------------------------------------|---------------------------------------------------------------------------------------------------------------------------------------------------------------------------------------------------------------------------------------------------|
|                                                    |                                                             |                                                                                                                                                                                           |                                                          |                                                   | environment also increased from 40.4% to 54.5% (P < 0.001). There were no significant changes in all the practice of malaria prevention methods in the control group.                                                                                                                                                                                                                                                                          |                                                                                                                                                     |                                                                                                                                                                                                                                                   |
| Okonofua et al <sup>75</sup> (2011)<br><br>Nigeria | Whole country: 36 states plus FCT rural and urban community | Intervention evaluation (quasi-experimental): To determine the outcome of an advocacy program aimed at implementing a policy of free maternal and child health (MCH) services in Nigeria. | Free maternal and child health (MCH) services in Nigeria | Across the continuum of care<br><br>Policy makers | By December 2009, nine States (and FCT) (24.4%) were practicing comprehensive free maternal and child health policy in Nigeria, while 14 states (37.8%) offered partially free services. This represents an increase of eight states (53.3%) over the 15 states that offered free services before the advocacy activities began. Data from one state indicated an increase in ANC utilisation and attendance for delivery and post-natal care. | Yes: Advocacy has been successful in building the commitment of high-level government officials in addressing maternal and child health in Nigeria. | Barriers: Challenges implementing free services, insufficient data to monitor and evaluate program.<br><br>Facilitators: commitment of policy makers to the issue, stakeholder engagement, demand creation activities, culture of accountability. |

|                                                                                                                                                             |                                                                          |                                                                                |                                                                                                                                                                                                   |                                                                                                                  |                                                                                                    |                                                                                                                                                                                                                                                                                                                                                                                                                                                                                                                                      |                                                                                                                                                                                                               |                                                                                                                                                                        |
|-------------------------------------------------------------------------------------------------------------------------------------------------------------|--------------------------------------------------------------------------|--------------------------------------------------------------------------------|---------------------------------------------------------------------------------------------------------------------------------------------------------------------------------------------------|------------------------------------------------------------------------------------------------------------------|----------------------------------------------------------------------------------------------------|--------------------------------------------------------------------------------------------------------------------------------------------------------------------------------------------------------------------------------------------------------------------------------------------------------------------------------------------------------------------------------------------------------------------------------------------------------------------------------------------------------------------------------------|---------------------------------------------------------------------------------------------------------------------------------------------------------------------------------------------------------------|------------------------------------------------------------------------------------------------------------------------------------------------------------------------|
| 1<br>2<br>3<br>4<br>5<br>6<br>7<br>8<br>9<br>10<br>11<br>12<br>13<br>14<br>15<br>16<br>17<br>18<br>19<br>20<br>21<br>22<br>23<br>24<br>25<br>26<br>27<br>28 | Findley et al <sup>76</sup><br>(2013)<br><br>International               | Katsina, Zamfara<br>and Yobe (NE,<br>NW)<br>rural<br>community                 | Intervention<br>evaluation<br>quasi-<br>experimental                                                                                                                                              | Community<br>Based Maternal,<br>Newborn and<br>Child Health<br>Service<br>Delivery*.                             | Across the<br>continuum of<br>care<br><br>Women of<br>childbearing<br>age (15-49yrs)               | Anti-tetanus<br>vaccination rates and<br>early breast-feeding<br>rates increased.<br>Compared to the<br>control communities,<br>more than twice as<br>many women in<br>intervention<br>communities knew to<br>watch for specific<br>newborn danger signs<br>and significantly<br>fewer mothers did<br>nothing when their<br>child was sick. The<br>largest changes in care<br>for sick children were<br>seen in the use of<br>medications across<br>intervention areas,<br>leading to improved<br>home care for fever<br>and coughs. | Yes: The<br>community-based<br>approach to<br>promoting<br>improved<br>newborn and sick<br>childcare through<br>community<br>volunteers and<br>CHWs resulted in<br>improved<br>newborn and sick<br>childcare. | Facilitators: Group<br>learning and<br>communication<br>model used as part of<br>program strategy.                                                                     |
| 29<br>30<br>31<br>32<br>33<br>34<br>35<br>36<br>37<br>38<br>39<br>40<br>41<br>42<br>43<br>44<br>45<br>46<br>47                                              | Pathfinder<br>International <sup>77</sup><br>(2011)<br><br>International | Kano, Lagos,<br>Borno (NW,<br>SW)<br>rural<br>community and<br>health facility | Intervention<br>evaluation<br>(process and<br>outcome):<br>To improve health<br>system and<br>community<br>structures to<br>enable sustainable<br>change in the<br>quality and<br>coordination of | Maternal Health<br>Care<br>Improvement<br>Initiative:<br>Capacity building<br>and Health system<br>strengthening | Across the<br>continuum of<br>care<br><br>Health workers<br>Community<br>and political<br>leaders. | MCHIC members,<br>facility health<br>workers, male<br>motivators, young<br>mother peer educators,<br>CHWs and TBAs<br>were trained in<br>various maternal<br>health care concepts<br>and advocacy. There<br>was an observed<br>increase in community                                                                                                                                                                                                                                                                                 | Yes                                                                                                                                                                                                           | Barriers:<br>Political constraints,<br>inadequate<br>infrastructure,<br>cultural and religious<br>perceptions and<br>practices, poor<br>monitoring, and<br>evaluation. |



|                                                      |                                                          |                                                                                                                                                                                                                |                                                              |                                                                          |                                                                                                                                                                                                                                                                                                                                                                                          |                                                                                                                                                                                   |                                                                                                                                |
|------------------------------------------------------|----------------------------------------------------------|----------------------------------------------------------------------------------------------------------------------------------------------------------------------------------------------------------------|--------------------------------------------------------------|--------------------------------------------------------------------------|------------------------------------------------------------------------------------------------------------------------------------------------------------------------------------------------------------------------------------------------------------------------------------------------------------------------------------------------------------------------------------------|-----------------------------------------------------------------------------------------------------------------------------------------------------------------------------------|--------------------------------------------------------------------------------------------------------------------------------|
|                                                      |                                                          | maternal health (MH) service delivery, and to shape MH care-seeking behaviour among key populations.                                                                                                           |                                                              |                                                                          | service uptake for skilled birth attendants.                                                                                                                                                                                                                                                                                                                                             |                                                                                                                                                                                   | Facilitators: community involvement.                                                                                           |
| Galadanci et al <sup>78</sup> (2010)<br>Nigeria      | Kano (NW) rural and urban health facility                | Impact evaluation: To demonstrate the impact of introduction of free maternity services in Kano state                                                                                                          | Free Maternity Health Service Policy at Secondary Facilities | Across the continuum of care<br><br>Women of childbearing age (15-49yrs) | Since the introduction of free maternity services in 2001, ANC attendance and facility deliveries. Only 50% of women in the State utilize antenatal clinic.                                                                                                                                                                                                                              | No: Despite eight years of free maternity services in Kano State, there is still low utilization of maternity services.                                                           | Barriers: Inadequate funding, poor stock of commodities, inadequate infrastructure, and staff retention.                       |
| Charurat et al <sup>79</sup> (2010)<br>International | Kano, Zamfara and Katsina (NW, NE) urban health facility | Pre/Post intervention evaluation (mixed methodology): To determine the effectiveness of systematic screening to increase the use of FP and PFP services in selected MCHIP-supported sites in Northern Nigeria. | Postpartum Systematic Screening*                             | Postnatal (mothers and newborn)<br><br>Post-partum women                 | With this postpartum systematic screening checklist, clients attending immunization, newborn care and paediatric/sick baby services were more likely to be screened for FP, postnatal care and immunisation services. In response to high unmet need for FP, the majority (73%) of trained providers knew at least three family planning methods that are suitable for postpartum women, | No: The initiative increased screening for postpartum services and overall quality of counselling/ knowledge of providers. It however did not result in an increase in FP uptake. | Barriers: stock outs of commodities, needing husband's permission, long distances, women's lack of information about services. |

|                                                                                                                                        |                                                          |                                                                                                                  |                                                                                                                                                                                                          |                                                               |                                                                                                                                                                                                                   |                                                                                                                                                                                                                                                                                                      |                                                                                                                                          |                                                                                                                                                                                                                                                                    |
|----------------------------------------------------------------------------------------------------------------------------------------|----------------------------------------------------------|------------------------------------------------------------------------------------------------------------------|----------------------------------------------------------------------------------------------------------------------------------------------------------------------------------------------------------|---------------------------------------------------------------|-------------------------------------------------------------------------------------------------------------------------------------------------------------------------------------------------------------------|------------------------------------------------------------------------------------------------------------------------------------------------------------------------------------------------------------------------------------------------------------------------------------------------------|------------------------------------------------------------------------------------------------------------------------------------------|--------------------------------------------------------------------------------------------------------------------------------------------------------------------------------------------------------------------------------------------------------------------|
|                                                                                                                                        |                                                          |                                                                                                                  |                                                                                                                                                                                                          |                                                               | and all of them were providing family planning counselling to pregnant or postpartum women. While family planning referral increase dramatically, only few women (15%) said they would go for referrals same day. |                                                                                                                                                                                                                                                                                                      |                                                                                                                                          |                                                                                                                                                                                                                                                                    |
| 15<br>16<br>17<br>18<br>19<br>20<br>21<br>22<br>23<br>24                                                                               | Omole et al <sup>80</sup><br>(2018)<br><br>International | Osun (SW)<br>urban<br>health facility                                                                            | RCT:<br>To determine the impact of an SMS based intervention on maternal health seeking behaviour.                                                                                                       | mhealth/SMS based health promotion intervention*              | Pregnancy<br><br>Pregnant women                                                                                                                                                                                   | An increase in facility-based delivery seen in the intervention group. Most participants in the intervention group expressed support for the use of text message for maternal health promotion                                                                                                       | Yes: Positive impact of SMS intervention on facility-based delivery.                                                                     | Barriers: financial constraints, low level of literacy among recipients.                                                                                                                                                                                           |
| 25<br>26<br>27<br>28<br>29<br>30<br>31<br>32<br>33<br>34<br>35<br>36<br>37<br>38<br>39<br>40<br>41<br>42<br>43<br>44<br>45<br>46<br>47 | Okoli et al <sup>81</sup><br>(2014)<br><br>Nigeria       | FCT, Nassarawa, Ogun, Kaduna, Zamfara, Bauchi, Anambra, Ebonyi, Bayelsa (NC, SW, NW, NE, SE, SS) rural community | Program evaluation (quasi-experimental design):<br>To describe the use and effect of a Conditional Cash Transfer (CCT) programme to encourage use of critical MNCH services among rural women in Nigeria | Conditional Cash Transfer (CCT) for maternal and child health | Across the continuum of care<br><br>Women of childbearing age (15-49yrs)                                                                                                                                          | The CCT intervention is associated with a statistically significant increase in the monthly number of women attending four or more ANC visits (p < 0.01; 95% confidence interval 7.38 to 22.85). A statistically significant increase was also observed in the monthly number of women receiving two | Yes: CCT intervention showed significant effects on service uptake, although results for several outcomes of interest were inconclusive. | Barriers: loss of CCT beneficiaries to follow up, limited capacity of facilities to meet additional work required.<br><br>Facilitators: Collaborations with other organisations, building trust and promoting utilisation through prompt delivery of intervention. |

1  
2  
3  
4  
5  
6  
7  
8  
9  
10  
11  
12  
13  
14  
15  
16  
17  
18  
19  
20  
21  
22  
23  
24  
25  
26  
27  
28  
29  
30  
31  
32  
33  
34  
35  
36  
37  
38  
39  
40  
41  
42  
43  
44  
45  
46  
47

|                                                 |                                      |                                                                                                                                                                                      |                                                                                     |                                                                |                                                                                                                                                                                                                                                                                                                                                                                        |                                                                                                                                                                                             |                                                                                                                                                                                                                                                                                                                |
|-------------------------------------------------|--------------------------------------|--------------------------------------------------------------------------------------------------------------------------------------------------------------------------------------|-------------------------------------------------------------------------------------|----------------------------------------------------------------|----------------------------------------------------------------------------------------------------------------------------------------------------------------------------------------------------------------------------------------------------------------------------------------------------------------------------------------------------------------------------------------|---------------------------------------------------------------------------------------------------------------------------------------------------------------------------------------------|----------------------------------------------------------------------------------------------------------------------------------------------------------------------------------------------------------------------------------------------------------------------------------------------------------------|
|                                                 |                                      |                                                                                                                                                                                      |                                                                                     |                                                                | or more Tetanus toxoid doses during pregnancy (p < 0.01; 95% CI 9.23 to 34.08). Changes for other outcomes (number of women attending first ANC visit; number of deliveries with skilled attendance; number of neonates receiving OPV at birth) were not found to be statistically significant.                                                                                        |                                                                                                                                                                                             |                                                                                                                                                                                                                                                                                                                |
| Liu et al <sup>82</sup> (2019)<br>International | Akwa Ibom (SS) urban health facility | Pragmatic randomised control trial: To implement and evaluate a conditional cash transfer (CCT) programme for preventing mother-to-child transmission (PMTCT) in Akwa Ibom, Nigeria. | Conditional Cash Transfer (CCT) to improve utilisation of health services for PMTCT | Pregnancy and postnatal (mother and newborn)<br>Pregnant women | Women offered the CCT programme were more likely to give birth at the facility compared to women in standard care. For EID testing there was an absolute difference of 12.8% between those offered the CCT intervention and those in standard care. Over 86% of the facility-delivered newborns received nevirapine, and ITT and PP estimates were like those for facility deliveries. | Yes: CCTs improved the likelihood of HIV-positive women giving birth at a facility, of nevirapine being administered to their newborn, and of undergoing EID testing in Akwa Ibom, Nigeria. | Barriers: Challenges with accessing funds/cash, needing to obtaining partner permission, lack of integrated information systems across facilities, requirements to participate and dealing with a new HIV diagnosis. Facilitators: Positive encouragement, regular reminders, and counselling of participants. |

|                                                                                                                                                                                                                                                       |                                                                      |                                                                                                                                                                                                                                                                  |                                                                                                         |                                                                                              |                                                                                                                                                                                                                                                                                                                                                                                                                                                   |                                                                                                                                             |  |
|-------------------------------------------------------------------------------------------------------------------------------------------------------------------------------------------------------------------------------------------------------|----------------------------------------------------------------------|------------------------------------------------------------------------------------------------------------------------------------------------------------------------------------------------------------------------------------------------------------------|---------------------------------------------------------------------------------------------------------|----------------------------------------------------------------------------------------------|---------------------------------------------------------------------------------------------------------------------------------------------------------------------------------------------------------------------------------------------------------------------------------------------------------------------------------------------------------------------------------------------------------------------------------------------------|---------------------------------------------------------------------------------------------------------------------------------------------|--|
| <p>1<br/>2<br/>3<br/>4<br/>5<br/>6<br/>7<br/>8<br/>9<br/>10<br/>11<br/>12<br/>13<br/>14<br/>15<br/>16<br/>17<br/>18<br/>19<br/>20<br/>21<br/>22</p> <p>Edu et al<sup>83</sup><br/>(2017)<br/><br/>Nigeria</p>                                         | <p>Cross Rivers<br/>(SS)<br/>rural and urban<br/>health facility</p> | <p>Program<br/>evaluation using a<br/>mixed method<br/>design:<br/>To evaluate the<br/>effect of a free<br/>maternal health<br/>care program on<br/>the health care-<br/>seeking<br/>behaviours of<br/>pregnant women<br/>in Cross River<br/>State, Nigeria.</p> | <p>Free Maternal<br/>Health Care<br/>Program at<br/>primary and<br/>secondary health<br/>facilities</p> | <p>Across the<br/>continuum of<br/>care<br/>Women of<br/>childbearing<br/>age (15-49yrs)</p> | <p>Results of quantitative<br/>data show increase in<br/>the percentage of<br/>women accessing<br/>maternal health<br/>services. Qualitative<br/>results showed that<br/>women perceived that<br/>there have been<br/>increases in the<br/>number of women<br/>who utilize Antenatal<br/>care, delivery, and<br/>Post-Partum Care at<br/>health facilities,<br/>following the removal<br/>of direct cost of<br/>maternal health<br/>services.</p> | <p>Yes: Intervention<br/>led to an increase<br/>in the number of<br/>women who<br/>utilise health<br/>facilities for their<br/>care.</p>    |  |
| <p>23<br/>24<br/>25<br/>26<br/>27<br/>28<br/>29<br/>30<br/>31<br/>32<br/>33<br/>34<br/>35<br/>36<br/>37<br/>38<br/>39<br/>40<br/>41<br/>42<br/>43<br/>44<br/>45<br/>46<br/>47</p> <p>Noguchi et al<sup>84</sup><br/>(2020)<br/><br/>International</p> | <p>Nassarawa State<br/>(NC)<br/>urban<br/>health facility</p>        | <p>Pragmatic, cluster<br/>randomized,<br/>controlled trial:<br/>To investigate the<br/>impact of G-ANC<br/>on various<br/>maternal newborn<br/>health-related<br/>outcomes- IPTp<br/>uptake and<br/>insecticide-treated<br/>nets (ITN) use.</p>                  | <p>Grouped<br/>Antenatal Care<br/>for MIP<br/>interventions*</p>                                        | <p>Pregnancy<br/><br/>Pregnant<br/>women</p>                                                 | <p>Mean number of IPTp<br/>doses received was<br/>higher for intervention<br/>versus control arm.<br/>Reported use of ITN<br/>the previous night was<br/>similarly high in both<br/>arms for mothers in<br/>Nigeria (over 92%).<br/>Reported ITN use for<br/>infants (but not<br/>mothers) was higher<br/>in the intervention<br/>versus control arm in<br/>Nigeria.</p>                                                                          | <p>Yes: G-ANC may<br/>support uptake of<br/>important MIP<br/>interventions,<br/>particularly IPTp<br/>coverage and<br/>IPTp-SP uptake.</p> |  |

|                                                                        |                                                                    |                                                                                                                                                                                                                                               |                                                                                                              |                                                                                                                        |                                                                                                                                                                                                                                                                                                                                                                        |                                                                                                                                                                                                  |                                                                                                                                                                                                                                                             |
|------------------------------------------------------------------------|--------------------------------------------------------------------|-----------------------------------------------------------------------------------------------------------------------------------------------------------------------------------------------------------------------------------------------|--------------------------------------------------------------------------------------------------------------|------------------------------------------------------------------------------------------------------------------------|------------------------------------------------------------------------------------------------------------------------------------------------------------------------------------------------------------------------------------------------------------------------------------------------------------------------------------------------------------------------|--------------------------------------------------------------------------------------------------------------------------------------------------------------------------------------------------|-------------------------------------------------------------------------------------------------------------------------------------------------------------------------------------------------------------------------------------------------------------|
| <p>Oguntunde et al<sup>85</sup> (2018)</p> <p>Nigeria</p>              | <p>Kaduna and Jigawa (NW) rural community</p>                      | <p>Program outcome evaluation:<br/>To assess the perceptions of stakeholders and beneficiaries of ETS in two states in northern Nigeria, comparing two models of ETS [stand alone or part of an integrated package of MNH interventions].</p> | <p>Emergency Transport Schemes (ETS)*</p>                                                                    | <p>Pregnancy and childbirth.<br/>Pregnant women husbands community members health workers health service providers</p> | <p>Demand creation activities – especially working with traditional birth attendants and religious leaders – provided a strong linkage between the ETS and families of women in need of emergency transport services. Community members perceived the ETS model that included demand-generating activities as being more reliable and responsive to women’s needs.</p> | <p>Yes: ETS remained a key solution to lack of transport as a barrier to utilizing maternal and newborn health services in emergency situations in many rural and hard-to-reach communities.</p> | <p>Barriers: Security challenges, need for husband’s permission, poor road conditions, driver’s reluctance to attend to non-emergencies.</p> <p>Facilitators: Dedication of drivers in the scheme, integrated approach of program, community awareness.</p> |
| <p>Lalonde &amp; Grellier<sup>86</sup> (2012)</p> <p>International</p> | <p>Edo, Anambra, and Kaduna (SE, SS, NW) urban health facility</p> | <p>Program impact evaluation:<br/>An assessment of FIGO Saving Mothers and Newborns Initiative 2006–2011</p>                                                                                                                                  | <p>FIGO Saving Mothers and Newborns Initiative: training in emergency obstetric and newborn care (EmONC)</p> | <p>Across the continuum of care<br/><br/>Mothers and newborns</p>                                                      | <p>Magnesium sulfate supplied to all State hospitals by Kaduna State Government. Efforts led to the cost of magnesium sulfate reduced by manufacturers. And at least 4 obstetric protocols introduced. Significant reduction (approx. 28%) in maternal mortality due to eclampsia at the project site.</p>                                                             | <p>Yes.</p>                                                                                                                                                                                      | <p>Barriers: Limited financial resources, civil unrest.</p> <p>Facilitators: community participation and ownership.</p>                                                                                                                                     |

|                                                                 |                                                              |                                                                                                                                                         |                                            |                                                                       |                                                                                                                                                                                                                                                                                                     |                                                                                                                                                                        |                                                                                                                                                   |
|-----------------------------------------------------------------|--------------------------------------------------------------|---------------------------------------------------------------------------------------------------------------------------------------------------------|--------------------------------------------|-----------------------------------------------------------------------|-----------------------------------------------------------------------------------------------------------------------------------------------------------------------------------------------------------------------------------------------------------------------------------------------------|------------------------------------------------------------------------------------------------------------------------------------------------------------------------|---------------------------------------------------------------------------------------------------------------------------------------------------|
| <p>Okeke et al<sup>87</sup><br/>(2017)</p> <p>International</p> | <p>Enugu, Kwara and Kano (SE, NC, NE) rural community</p>    | <p>Program evaluation-outcome:<br/>To assess the outcomes of the implementation of the Nigeria Midwives Service Scheme</p>                              | <p>Midwives Service Scheme (MSS)*</p>      | <p>Pregnancy and childbirth.<br/><br/>Pregnant women<br/>Midwives</p> | <p>A slight increase of the use of antenatal care was observed, with no measurable impact on skilled birth attendance.<br/>Findings report important design, implementation and operational challenges that likely contributed to the program's lack of impact.</p>                                 | <p>No: Program achieved only a modest impact on the use of antenatal care and no measurable impact on skilled birth attendance.</p>                                    | <p>Barriers: Problems with the design of program, geographical challenges, limited awareness of clinic services and poor quality of services.</p> |
| <p>Ameh et al<sup>88</sup><br/>(2016)</p> <p>International</p>  | <p>Multi-country: Nigeria included urban health facility</p> | <p>Post program evaluation:<br/>To evaluate the effectiveness of healthcare provider training in Emergency Obstetric and Newborn Care (EmOC&amp;NC)</p> | <p>standardised EmONC training package</p> | <p>Across the continuum of care<br/><br/>Healthcare providers</p>     | <p>99.7% of healthcare providers improved their overall score for knowledge and for skill. There were significant improvements in knowledge and skills for each cadre of healthcare provider (p&lt;0.05), with the largest change seen for recognition and management of obstetric haemorrhage.</p> | <p>Yes: Short in-service EmOC&amp;NC training was associated with improved knowledge and skills for all cadres of healthcare providers working in maternity wards.</p> | <p>Barriers: Problems with intervention design.</p>                                                                                               |

|                                                                 |                                                                   |                                                                                                                                                                                                                                             |                                                                                        |                                                                  |                                                                                                                                                                                                                                                                                                                                                                                              |                                                                                                                                                                                                                                                  |                                                                                                                                                                 |
|-----------------------------------------------------------------|-------------------------------------------------------------------|---------------------------------------------------------------------------------------------------------------------------------------------------------------------------------------------------------------------------------------------|----------------------------------------------------------------------------------------|------------------------------------------------------------------|----------------------------------------------------------------------------------------------------------------------------------------------------------------------------------------------------------------------------------------------------------------------------------------------------------------------------------------------------------------------------------------------|--------------------------------------------------------------------------------------------------------------------------------------------------------------------------------------------------------------------------------------------------|-----------------------------------------------------------------------------------------------------------------------------------------------------------------|
| <p>Brals et al<sup>89</sup><br/>(2017)</p> <p>International</p> | <p>Kwara (NC)<br/>rural<br/>community and<br/>health facility</p> | <p>Interrupted time series- (quasi-experimental design):<br/>To evaluate the effect of the introduction of a multifaceted voluntary health insurance programme on hospital deliveries in rural Nigeria</p>                                  | <p>Kwara State Health Insurance program- a community-based health insurance scheme</p> | <p>Across the continuum of care</p> <p>Households</p>            | <p>Insurance coverage reached up to 70.2% in four years in the program area. An increase in hospital deliveries was observed in the program area during the 4-year follow-up period. Even women who did not enrol in health insurance but who could make use of the upgraded care, delivered more often in a hospital during the follow-up period than women living in the control area.</p> | <p>Yes: Voluntary health insurance combined with quality healthcare services was highly effective in increasing hospital deliveries in rural Nigeria, by improving access to healthcare for insured and uninsured women in the program area.</p> | <p>Barriers: Long distance from facilities.</p> <p>Facilitators: Integrated approach, improvement in quality of services.</p>                                   |
| <p>Okeke et al<sup>90</sup><br/>(2016)</p> <p>International</p> | <p>Whole country-<br/>Nigeria<br/>rural<br/>community</p>         | <p>Pre/post program evaluation:<br/>To examine the effects of the Midwives Service Scheme (MSS), a public sector program in Nigeria that increased the supply of skilled midwives in rural communities on pregnancy and birth outcomes.</p> | <p>Midwives Service Scheme (MSS)*</p>                                                  | <p>Pregnancy and childbirth</p> <p>Women of childbearing age</p> | <p>The main measured effect of the scheme was a 7.3 percentage point increase in antenatal care use in program clinics and a 5-percentage point increase in overall use of antenatal care, both within the first year of the program. We found no statistically significant effect of the scheme on skilled birth attendance or on maternal delivery complications.</p>                      | <p>No: Minimal improvements seen following the program, highlighting that scaling up supply of midwives may not be sufficient on its own to improve maternal and newborn health.</p>                                                             | <p>Barriers: Challenges with retention of midwives in scheme, poor quality of services, low perceived need for services, lack of transportation facilities.</p> |

|                                                           |                                                        |                                                                                                                                                                                                                                         |                                                                                         |                                                                                    |                                                                                                                                                                                                                                                                                                                                                                                           |                                                                                                                                                                                                                                                             |                                                                                                                                                                             |
|-----------------------------------------------------------|--------------------------------------------------------|-----------------------------------------------------------------------------------------------------------------------------------------------------------------------------------------------------------------------------------------|-----------------------------------------------------------------------------------------|------------------------------------------------------------------------------------|-------------------------------------------------------------------------------------------------------------------------------------------------------------------------------------------------------------------------------------------------------------------------------------------------------------------------------------------------------------------------------------------|-------------------------------------------------------------------------------------------------------------------------------------------------------------------------------------------------------------------------------------------------------------|-----------------------------------------------------------------------------------------------------------------------------------------------------------------------------|
| <p>Okereke et al<sup>91</sup> (2015)</p> <p>Nigeria</p>   | <p>Jigawa (NW) urban community and health facility</p> | <p>Post intervention assessment (qualitative): To assess the potential of clinical mentoring to improve maternal, newborn and child health service delivery, as well as the successes/challenges associated with the implementation</p> | <p>Clinical mentoring for health workers</p>                                            | <p>Across the continuum of care</p> <p>health workers health service providers</p> | <p>Clinical mentoring improved service delivery within the health facilities. Significant improvements in the professional capacity of mentored health workers were observed. Best practices were introduced with the support of the clinical mentors such as the use of magnesium sulphate and misoprostol for the management of eclampsia and post-partum haemorrhage respectively.</p> | <p>Yes: Stakeholders report that the introduction of clinical mentoring into the Jigawa State health system gave rise to an improved capacity of the mentored health care workers to deliver better quality maternal, newborn and child health services</p> | <p>Barriers: Financial costs of recruiting clinical mentors, insufficient time for health providers.</p> <p>Facilitators: promoting local ownership and sustainability.</p> |
| <p>Oguntunde et al<sup>92</sup> (2019)</p> <p>Nigeria</p> | <p>Kaduna and Katsina (NW) rural community</p>         | <p>Pre/post intervention evaluation (qualitative): To examine an intervention that educated married men in northern Nigeria about health issues related to pregnancy, labour, delivery, and the postpartum</p>                          | <p>Men's support group intervention to increase male involvement in women's health*</p> | <p>Across the continuum of care</p> <p>Married men.</p>                            | <p>Perceptions of the male support groups were overwhelmingly positive. Participants internalized important messages they learned, which influenced their decisions related to the health of their wives and children. Some take it upon themselves to educate others in their communities about</p>                                                                                      | <p>Yes: In the northern Nigeria context, educating men about danger signs of pregnancy, labour, delivery, newborn, and child health was crucial to improving maternal and newborn health outcomes. The intervention was</p>                                 | <p>Barriers: Financial cost of associated services.</p> <p>Facilitators: Inclusion of the community, positive perceived benefits of participation.</p>                      |



|                                             |                                                 |                                                                                                                                                                                  |                                                         |                                                    |                                                                                                                                                                                                                                                                                        |                                                                                                                                                       |                                                                                                                                                                                                                                            |
|---------------------------------------------|-------------------------------------------------|----------------------------------------------------------------------------------------------------------------------------------------------------------------------------------|---------------------------------------------------------|----------------------------------------------------|----------------------------------------------------------------------------------------------------------------------------------------------------------------------------------------------------------------------------------------------------------------------------------------|-------------------------------------------------------------------------------------------------------------------------------------------------------|--------------------------------------------------------------------------------------------------------------------------------------------------------------------------------------------------------------------------------------------|
|                                             |                                                 | period, as well as newborn and child health, through participation in male support groups.                                                                                       |                                                         |                                                    | what they learned, and many say they see changes at the community level, with more utilization of maternal, newborn, and child health services.                                                                                                                                        | successful such that the effect of the intervention went beyond participants to the community.                                                        |                                                                                                                                                                                                                                            |
| Adaji et al <sup>93</sup> (2019)<br>Nigeria | Kaduna (NW) rural community and health facility | Pre/post intervention assessment: To assess women's experience of group prenatal care in a rural Nigerian community.                                                             | Centering Pregnancy Model- group prenatal care program* | Pregnancy<br><br>Pregnant women                    | Mothers who could mention at least five out of eight danger signs of pregnancy increased significantly. Commitment to birth preparedness plans was high. The mothers enjoyed the group sessions and shared the lessons they learned with others.                                       | Yes: Group prenatal care was acceptable to women and utilised.                                                                                        | Barriers: Limited health service providers for implementation.<br><br>Facilitators: positive peer group dynamics and social networks.                                                                                                      |
| Onwujekwe et al <sup>94</sup> (2019)        | FCT (NC) urban health facility                  | Post program assessment (Qualitative): To examine the implementation of the NHIS-MCH project and identify barriers and facilitators for implementation, adaptation and scale up. | Free maternal and child health program                  | Across the continuum of care<br><br>Pregnant women | The program enrolled about 1.5 million pregnant women and children during the period of implementation in the country. The respondents perceived the program as pro-poor, efficient, and effective, and led to marked improvement in the functionality of the facilities, availability | Yes: The NHIS-MDG FMCHP had positive impact on the target population though it was not sustained following the conclusion of the MDG program in 2015. | Barriers: Inadequate stakeholder consultation, alleged corrupt practices, human resources challenges, infrastructural challenges, issues with counterpart funding and public financing.<br><br>Facilitators: Problems with project design. |

|                                                                                                                |                                                    |                                       |                                                                                                                                                                                                                                                                        |                                                                                                                                                                |                                                                                                                   |                                                                                                                                                                                                                                                                 |                                                                                                                                                                                         |                                                                                |
|----------------------------------------------------------------------------------------------------------------|----------------------------------------------------|---------------------------------------|------------------------------------------------------------------------------------------------------------------------------------------------------------------------------------------------------------------------------------------------------------------------|----------------------------------------------------------------------------------------------------------------------------------------------------------------|-------------------------------------------------------------------------------------------------------------------|-----------------------------------------------------------------------------------------------------------------------------------------------------------------------------------------------------------------------------------------------------------------|-----------------------------------------------------------------------------------------------------------------------------------------------------------------------------------------|--------------------------------------------------------------------------------|
|                                                                                                                |                                                    |                                       |                                                                                                                                                                                                                                                                        |                                                                                                                                                                | of services and reduced out-of-pocket expenditure, which led to increased demand and utilization of MCH services. |                                                                                                                                                                                                                                                                 |                                                                                                                                                                                         |                                                                                |
| 11<br>12<br>13<br>14<br>15<br>16<br>17<br>18<br>19<br>20<br>21<br>22<br>23<br>24<br>25<br>26<br>27<br>28<br>29 | Brown et al <sup>95</sup><br>(2016)<br><br>Nigeria | Oyo (SW)<br>urban<br>community        | Cluster<br>randomized<br>control trial:<br>To evaluate the<br>effect of<br>reminder/recall<br>system and<br>Primary Health<br>Care<br>Immunization<br>Providers'<br>Training<br>(PHCIPT)<br>intervention on<br>routine<br>immunization<br>completion<br>among infants. | Community<br>Nurse led<br>Reminder/Recall<br>(R/R) system<br>Alone and in<br>combination with<br>Primary Health<br>care<br>immunization<br>providers' training | Postnatal<br>(infant)<br><br>Mothers and<br>infants.                                                              | Cell phone<br>reminder/recall was<br>associated with the<br>highest immunization<br>completion rates<br>among the children in<br>the study.                                                                                                                     | Yes: cell phone<br>reminder/recall<br>was effective in<br>improving<br>immunization<br>completion rates.                                                                                |                                                                                |
| 30<br>31<br>32<br>33<br>34<br>35<br>36<br>37<br>38<br>39<br>40<br>41<br>42<br>43<br>44<br>45<br>46<br>47       | Asa et al <sup>96</sup><br>(2008)<br><br>Nigeria   | Osun (SW)<br>rural<br>health facility | Open randomised<br>control trial:<br>To evaluate the<br>efficacy of<br>intermittent<br>preventive<br>treatment of<br>malaria using<br>sulphadoxine-<br>pyrimethamine<br>(SP) in the                                                                                    | Intermittent<br>Preventive<br>Therapy in<br>Pregnancy IPT-p<br>for malaria using<br>sulphadoxine-<br>pyrimethamine<br>(SP)                                     | Pregnancy<br><br>Pregnant<br>women                                                                                | 33 (22.6%) and 52<br>(37.1%) women in the<br>study and control<br>groups, respectively,<br>had anaemia. With<br>multivariate analysis,<br>the difference in the<br>incidence of anaemia<br>in the two groups<br>remained significant<br>(p = 0.01; odds ratio = | Yes: The IPT<br>regime with<br>sulphadoxine-<br>pyrimethamine is<br>an effective,<br>practicable<br>strategy to<br>decrease risk of<br>anaemia in<br>women of low<br>parity residing in | Facilitators:<br>acceptability of<br>intervention among<br>target populations. |

|                                              |                                                  |                                                                                                                                                                                                  |                                                        |                                                          |                                                                                                                                                                                                                                                                                                                                                                                                                                                                                                        |                                                                                                                                                                                                                             |  |
|----------------------------------------------|--------------------------------------------------|--------------------------------------------------------------------------------------------------------------------------------------------------------------------------------------------------|--------------------------------------------------------|----------------------------------------------------------|--------------------------------------------------------------------------------------------------------------------------------------------------------------------------------------------------------------------------------------------------------------------------------------------------------------------------------------------------------------------------------------------------------------------------------------------------------------------------------------------------------|-----------------------------------------------------------------------------------------------------------------------------------------------------------------------------------------------------------------------------|--|
|                                              |                                                  | prevention of anaemia in women of low parity in a low socio-economic, malaria endemic setting.                                                                                                   |                                                        |                                                          | 0.5; 95% confidence interval = 0.29–0.85).                                                                                                                                                                                                                                                                                                                                                                                                                                                             | areas endemic for malaria.                                                                                                                                                                                                  |  |
| Walker et al <sup>97</sup> (2018)<br>Nigeria | Katsina (NW) rural community and health facility | Post intervention evaluation (quasi-experimental design):<br>To assess the impact of Muslim opinion leaders' training of healthcare providers on the uptake of MNCH services in Northern Nigeria | Muslim Opinion Leaders' led training of health workers | Across the continuum of care<br><br>Healthcare providers | The result indicates a significant difference both in perception and in practices between healthcare providers in intervention and control facilities, with respect to MNCH uptake. Access to services was higher in intervention facilities than in control facilities, with routine immunisation (including polio) recording highest hospital visits followed by other MNCH services related to pregnancy/child development. Family planning and hospital delivery were the least accessed services. | Yes: The healthcare providers who received trainings on Islamic precepts related to MNCH were able to spend greater amount of time with clients, providing counselling on Islam and MNCH. This led to improvements in MNCH. |  |

1  
2  
3  
4  
5  
6  
7  
8  
9  
10  
11  
12  
13  
14  
15  
16  
17  
18  
19  
20  
21  
22  
23  
24  
25  
26  
27  
28  
29  
30  
31  
32  
33  
34  
35  
36  
37  
38  
39  
40  
41  
42  
43  
44  
45  
46  
47

|                                                                                                          |                                                    |                                                 |                                                                                                                                                                                                        |                                                                                                                                |                                                                        |                                                                                                                                                                                                                       |                                                                                                                                                                                                            |                                                                                                                                    |
|----------------------------------------------------------------------------------------------------------|----------------------------------------------------|-------------------------------------------------|--------------------------------------------------------------------------------------------------------------------------------------------------------------------------------------------------------|--------------------------------------------------------------------------------------------------------------------------------|------------------------------------------------------------------------|-----------------------------------------------------------------------------------------------------------------------------------------------------------------------------------------------------------------------|------------------------------------------------------------------------------------------------------------------------------------------------------------------------------------------------------------|------------------------------------------------------------------------------------------------------------------------------------|
| 1<br>2<br>3<br>4<br>5<br>6<br>7<br>8<br>9<br>10<br>11<br>12<br>13<br>14                                  | Ehigiegba et al <sup>98</sup> (2012)<br>Nigeria    | Rivers (SS) urban community and health facility | Post program evaluation: To assess the implementation of a PMTCT program in a semi-urban cottage hospital, with a community health insurance scheme.                                                   | Community Health Insurance Scheme to promote the utilisation of MNCH services                                                  | Across the continuum of care<br><br>Pregnant women.                    | Service utilisation increased significantly. Average deliveries increased from about 20 to 120 per month. New infections were less than 2% in the period compared to 29% prior to the CHIS.                           | Yes: CHIS encouraged women to book early for ANC, which improved utilisation of VCT and other PMTCT services.                                                                                              | Facilitators: active community engagement, integration/ coordination of activities.                                                |
| 15<br>16<br>17<br>18<br>19<br>20<br>21<br>22<br>23<br>24<br>25<br>26<br>27<br>28<br>29                   | Adeleye et al <sup>99</sup> (2011)<br>Nigeria      | Edo (SS) rural community                        | Program process and outcome evaluation: To describe the development and implementation process of the Ekiador safe motherhood program and to analyze how it improved maternal health in the community. | Ekiador safe motherhood program: communication intervention to increase positive male engagement in maternal health            | Across the continuum of care<br><br>Community elders young adult males | A useful communication intervention was developed that increased the possibility of positive male engagement in maternal health.                                                                                      | Yes: Through small-group health talks, the male leaders in Ekiador, Southern Nigeria, became motivated to act as change agents and encouraged other men to assist with maternal health in their community. | Facilitators: delivery of intervention in line with local governance and customs                                                   |
| 30<br>31<br>32<br>33<br>34<br>35<br>36<br>37<br>38<br>39<br>40<br>41<br>42<br>43<br>44<br>45<br>46<br>47 | Haver et al <sup>100</sup> (2015)<br>International | Akwa Ibom (SS) rural community                  | Program evaluation: To describe outcomes, commonalities and lessons learned from country programs in which tasks in health promotion and distribution of                                               | CHW-led IPTp provision, insecticide-treated net distribution as part of a community-directed intervention for malaria control* | Pregnancy<br><br>Community health workers                              | The effects of the CDI program were largest for IPTp adherence, increasing the proportion of pregnant women taking at least two sulfadoxine-pyrimethamine doses during pregnancy by five times in the CDI communities | Yes: The health promotion and distribution of commodities afforded by these community based strategies yielded greater uptake of interventions than would have been achieved through                       | Barriers: poor access to underserved areas and absence of political will and commitment.<br><br>Facilitators: community engagement |

|                                                        |                                                                         |                                                                                                                                                                                |                                                                                            |                                                                        |                                                                                                                                                                                                                                                                                       |                                                                                                                                                                                                                |                                                                                                                                   |
|--------------------------------------------------------|-------------------------------------------------------------------------|--------------------------------------------------------------------------------------------------------------------------------------------------------------------------------|--------------------------------------------------------------------------------------------|------------------------------------------------------------------------|---------------------------------------------------------------------------------------------------------------------------------------------------------------------------------------------------------------------------------------------------------------------------------------|----------------------------------------------------------------------------------------------------------------------------------------------------------------------------------------------------------------|-----------------------------------------------------------------------------------------------------------------------------------|
|                                                        |                                                                         | commodities were intentionally shifted from skilled providers to CHWs to advance MNH strategies                                                                                |                                                                                            |                                                                        | compared with three times in the control group, for whom IPTp was available only at prenatal care (P<0.001)                                                                                                                                                                           | facility-based services alone.                                                                                                                                                                                 |                                                                                                                                   |
| Okeibunor et al <sup>101</sup> (2011)<br>International | Akwa Ibom (SS) rural community                                          | Before and After analysis (quasi-experimental design): To determine the degree to which community-directed interventions can improve access to malaria prevention in pregnancy | A community directed intervention (CDI) to improve effective access to malaria prevention. | Pregnancy<br>Pregnant women                                            | More women slept under an ITN during pregnancy in the treatment areas. The effects of the CDI programme were largest for IPTp adherence, increasing the fraction of pregnant women taking at least two SP doses during pregnancy by 35% relative to the control areas.                | Yes: Inclusion of community-based programmes with supply-side interventions substantially increased effective access to malaria prevention, and increase access to formal health care access-particularly ANC. | Barriers: Limited availability of intervention (ITNs). Facilitators: training and involvement of community members as volunteers. |
| Findley et al <sup>102</sup> (2015)<br>International   | Katsina, Zamfara (NW) and Yobe (NE) rural community and health facility | Quasi-experimental design: To evaluate an integrated maternal, newborn, and child health (MNCH) program to improve maternal health outcomes in Northern Nigeria                | Integrated Maternal, Newborn and Child Health (IMNCH) program*                             | Across the continuum of care<br>Women of childbearing age: 15-49 years | There was significant improvement in nearly all maternal health indicators assessed. These include women with standing permission from their husband to go to the health centre; health care utilization; delivery with a skilled birth attendant, knowledge of maternal danger signs | Yes: The improvements between 2009 and 2013 demonstrate the measurable impact on maternal health outcomes of the program through local communities and primary health care services.                           | Facilitators: Integration of interventions, improved quality of services at facilities, community engagement.                     |

|                                                     |                                   |                                                                                                                                                                 |                                                                                         |                                                         |                                                                                                                                                                                                                                                                                                                           |                                                                                                                                                                                                                  |                                                                                                                                                                               |
|-----------------------------------------------------|-----------------------------------|-----------------------------------------------------------------------------------------------------------------------------------------------------------------|-----------------------------------------------------------------------------------------|---------------------------------------------------------|---------------------------------------------------------------------------------------------------------------------------------------------------------------------------------------------------------------------------------------------------------------------------------------------------------------------------|------------------------------------------------------------------------------------------------------------------------------------------------------------------------------------------------------------------|-------------------------------------------------------------------------------------------------------------------------------------------------------------------------------|
|                                                     |                                   |                                                                                                                                                                 |                                                                                         |                                                         | and having at least 1 antenatal care (ANC) visit.                                                                                                                                                                                                                                                                         |                                                                                                                                                                                                                  |                                                                                                                                                                               |
| Leight et al <sup>103</sup> (2018)<br>International | Jigawa (NW) rural health facility | Cluster randomized control trial:<br>To examine the association between birth care receipt and use on maternal and neonatal health outcomes in Jigawa, Nigeria. | Community Resource Person (CoRP) led distribution of safe birth kits to pregnant women* | Pregnancy<br><br>Women of childbearing age: 15-49 years | Only about half of women who received the birth kits, used the kits.<br>There were no significant associations between birth kit use and facility-based delivery, completion of 4 or more ANC visits, skilled birth attendance and post-natal care. Women more likely to report prolonged labour and postpartum bleeding. | No: Introduction and the use of birth kits was not associated with reductions in maternal or neonatal morbidity, which may have been shaped by the mechanisms through which women accessed and utilise the kits. | Barriers: low level of penetration of birth kits, challenges with insecurity, low level of use of birth kits.<br><br>Facilitators: adequate education about the intervention. |

\* Interventions aligned with WHO 2011 and 2017 guidelines used in study.

NC: North-Central region

NW: North-West region

NE: North-East region

SS: South-South region

SE: South-East region

SW: South-West region

## Preferred Reporting Items for Systematic reviews and Meta-Analyses extension for Scoping Reviews (PRISMA-ScR) Checklist

| SECTION                           | ITEM | PRISMA-ScR CHECKLIST ITEM                                                                                                                                                                                                                                                                                  | REPORTED ON PAGE #   |
|-----------------------------------|------|------------------------------------------------------------------------------------------------------------------------------------------------------------------------------------------------------------------------------------------------------------------------------------------------------------|----------------------|
| <b>TITLE</b>                      |      |                                                                                                                                                                                                                                                                                                            |                      |
| Title                             | 1    | Identify the report as a scoping review.                                                                                                                                                                                                                                                                   | 1                    |
| <b>ABSTRACT</b>                   |      |                                                                                                                                                                                                                                                                                                            |                      |
| Structured summary                | 2    | Provide a structured summary that includes (as applicable): background, objectives, eligibility criteria, sources of evidence, charting methods, results, and conclusions that relate to the review questions and objectives.                                                                              | 2                    |
| <b>INTRODUCTION</b>               |      |                                                                                                                                                                                                                                                                                                            |                      |
| Rationale                         | 3    | Describe the rationale for the review in the context of what is already known. Explain why the review questions/objectives lend themselves to a scoping review approach.                                                                                                                                   | 4,5                  |
| Objectives                        | 4    | Provide an explicit statement of the questions and objectives being addressed with reference to their key elements (e.g., population or participants, concepts, and context) or other relevant key elements used to conceptualize the review questions and/or objectives.                                  | 5                    |
| <b>METHODS</b>                    |      |                                                                                                                                                                                                                                                                                                            |                      |
| Protocol and registration         | 5    | Indicate whether a review protocol exists; state if and where it can be accessed (e.g., a Web address); and if available, provide registration information, including the registration number.                                                                                                             | N/A                  |
| Eligibility criteria              | 6    | Specify characteristics of the sources of evidence used as eligibility criteria (e.g., years considered, language, and publication status), and provide a rationale.                                                                                                                                       | 6,7                  |
| Information sources*              | 7    | Describe all information sources in the search (e.g., databases with dates of coverage and contact with authors to identify additional sources), as well as the date the most recent search was executed.                                                                                                  | 6                    |
| Search                            | 8    | Present the full electronic search strategy for at least 1 database, including any limits used, such that it could be repeated.                                                                                                                                                                            | Supplementary file 2 |
| Selection of sources of evidence† | 9    | State the process for selecting sources of evidence (i.e., screening and eligibility) included in the scoping review.                                                                                                                                                                                      | 6                    |
| Data charting process‡            | 10   | Describe the methods of charting data from the included sources of evidence (e.g., calibrated forms or forms that have been tested by the team before their use, and whether data charting was done independently or in duplicate) and any processes for obtaining and confirming data from investigators. | 6,7                  |
| Data items                        | 11   | List and define all variables for which data were sought and any assumptions and simplifications made.                                                                                                                                                                                                     | 6                    |
| Critical appraisal of individual  | 12   | If done, provide a rationale for conducting a critical appraisal of included sources of evidence; describe                                                                                                                                                                                                 | N/A                  |



| SECTION                                       | ITEM | PRISMA-ScR CHECKLIST ITEM                                                                                                                                                                       | REPORTED ON PAGE #   |
|-----------------------------------------------|------|-------------------------------------------------------------------------------------------------------------------------------------------------------------------------------------------------|----------------------|
| sources of evidence§                          |      | the methods used and how this information was used in any data synthesis (if appropriate).                                                                                                      |                      |
| Synthesis of results                          | 13   | Describe the methods of handling and summarizing the data that were charted.                                                                                                                    | 6,7                  |
| <b>RESULTS</b>                                |      |                                                                                                                                                                                                 |                      |
| Selection of sources of evidence              | 14   | Give numbers of sources of evidence screened, assessed for eligibility, and included in the review, with reasons for exclusions at each stage, ideally using a flow diagram.                    | 8                    |
| Characteristics of sources of evidence        | 15   | For each source of evidence, present characteristics for which data were charted and provide the citations.                                                                                     | Table 2, 10          |
| Critical appraisal within sources of evidence | 16   | If done, present data on critical appraisal of included sources of evidence (see item 12).                                                                                                      | N/A                  |
| Results of individual sources of evidence     | 17   | For each included source of evidence, present the relevant data that were charted that relate to the review questions and objectives.                                                           | Supplementary file 1 |
| Synthesis of results                          | 18   | Summarize and/or present the charting results as they relate to the review questions and objectives.                                                                                            | 8-11                 |
| <b>DISCUSSION</b>                             |      |                                                                                                                                                                                                 |                      |
| Summary of evidence                           | 19   | Summarize the main results (including an overview of concepts, themes, and types of evidence available), link to the review questions and objectives, and consider the relevance to key groups. | 12, 13               |
| Limitations                                   | 20   | Discuss the limitations of the scoping review process.                                                                                                                                          | 13                   |
| Conclusions                                   | 21   | Provide a general interpretation of the results with respect to the review questions and objectives, as well as potential implications and/or next steps.                                       | 13                   |
| <b>FUNDING</b>                                |      |                                                                                                                                                                                                 |                      |
| Funding                                       | 22   | Describe sources of funding for the included sources of evidence, as well as sources of funding for the scoping review. Describe the role of the funders of the scoping review.                 | 1                    |

JB1 = Joanna Briggs Institute; PRISMA-ScR = Preferred Reporting Items for Systematic reviews and Meta-Analyses extension for Scoping Reviews.

\* Where *sources of evidence* (see second footnote) are compiled from, such as bibliographic databases, social media platforms, and Web sites.

† A more inclusive/heterogeneous term used to account for the different types of evidence or data sources (e.g., quantitative and/or qualitative research, expert opinion, and policy documents) that may be eligible in a scoping review as opposed to only studies. This is not to be confused with *information sources* (see first footnote).

‡ The frameworks by Arksey and O'Malley (6) and Levac and colleagues (7) and the JBI guidance (4, 5) refer to the process of data extraction in a scoping review as data charting.

§ The process of systematically examining research evidence to assess its validity, results, and relevance before using it to inform a decision. This term is used for items 12 and 19 instead of "risk of bias" (which is more applicable to systematic reviews of interventions) to include and acknowledge the various sources of evidence that may be used in a scoping review (e.g., quantitative and/or qualitative research, expert opinion, and policy document).

From: Tricco AC, Lillie E, Zarin W, O'Brien KK, Colquhoun H, Levac D, et al. PRISMA Extension for Scoping Reviews (PRISMA-ScR): Checklist and Explanation. *Ann Intern Med.* 2018;169:467–473. doi: 10.7326/M18-0850.

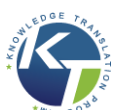

St. Michael's

Inspired Care.  
Inspiring Science.

For peer review only - <http://bmjopen.bmj.com/site/about/guidelines.xhtml>
