# Supplementary material for: Scoping review of maternal and newborn health interventions and programmes in Nigeria
Source: PubMed Central journal article supplement — BMJ Open. 2022 Feb 15;12(2):e054784. doi: 10.1136/bmjopen-2021-054784 (PMC8852735; doi:10.1136/bmjopen-2021-054784), 2022-02-15
Supplement: bmjopen-2021-054784supp001.pdf [file bmjopen-2021-054784supp001.pdf]

### Supplementary File 1: Search strategy and terms

#### PubMed search terms: 1<sup>st</sup> June, 2020.

((("Maternal Health"[Mesh]) OR "Infant, Newborn"[Mesh]) OR "Infant Health"[Mesh]) AND "Nigeria"[Mesh]) AND (("intervention" OR "program" OR "strategy"))

#### Embase search strategy: 11<sup>th</sup> July, 2020

1. "Maternal Health".mp. or maternal welfare/
2. "Infant, newborn".mp. or newborn/
3. "infant health".mp. or child health/
4. newborn care/ or "Newborn Health".mp.
5. 1 or 2 or 3 or 4
6. Nigeria.mp. [mp=title, abstract, heading word, drug trade name, original title, device manufacturer, drug manufacturer, device trade name, keyword, floating subheading word, candidate term word]
7. ("intervention" or "program" or "strategy").mp. [mp=title, abstract, heading word, drug trade name, original title, device manufacturer, drug manufacturer, device trade name, keyword, floating subheading word, candidate term word]
8. 5 and 6 and 7

#### Scopus search terms: 22<sup>nd</sup> July, 2020.

{maternal health} AND {newborn health} AND "Nigeria" AND "intervention" OR "program\*".

#### Websites of key organisations searched on Google 22<sup>nd</sup> July 2020.

Jhpiego

USAID/Maternal and Child Survival Program

Maternal Newborn Child Health (MNCH2) program

World Health Organisation

United Nations Children's Fund

Bill and Melinda Gates Foundation
