# Supplementary material for: Scoping review of maternal and newborn health interventions and programmes in Nigeria
Source: PubMed Central journal article supplement — BMJ Open. 2022 Feb 15;12(2):e054784. doi: 10.1136/bmjopen-2021-054784 (PMC8852735; doi:10.1136/bmjopen-2021-054784), 2022-02-15
Supplement: bmjopen-2021-054784supp002.pdf [file bmjopen-2021-054784supp002.pdf]

Supplementary File 2: Table S2: Data extraction tool and characteristics of included studies.

| Authors/<br>Publication<br>Year &<br>Lead author<br>Institution | Geographical<br>location/<br>setting/site                                                  | Study design and<br>Objective(s)                                                                                                                                                                                                                                  | Type of<br>Intervention*                                                                                                                                                                                  | Stage in<br>continuum of<br>care &<br>Target<br>Population(s)                                                                                                             | Reported Outcomes<br>(or<br>effectiveness/impact)                                                                                                                                                                              | Intended<br>outcomes<br>achieved<br>(Yes/No)                                                                                                                             | Barriers/challenges<br>and/or Facilitators                                                                     |
|-----------------------------------------------------------------|--------------------------------------------------------------------------------------------|-------------------------------------------------------------------------------------------------------------------------------------------------------------------------------------------------------------------------------------------------------------------|-----------------------------------------------------------------------------------------------------------------------------------------------------------------------------------------------------------|---------------------------------------------------------------------------------------------------------------------------------------------------------------------------|--------------------------------------------------------------------------------------------------------------------------------------------------------------------------------------------------------------------------------|--------------------------------------------------------------------------------------------------------------------------------------------------------------------------|----------------------------------------------------------------------------------------------------------------|
| Sloan et al <sup>24</sup><br>(2018)<br><br>International        | Kano, Katsina<br>and Kaduna<br>(NW)<br>urban and rural<br>community and<br>health facility | Program<br>evaluation<br>(before-after<br>analysis):<br>To evaluate the<br>MNH program<br>impact on<br>reducing<br>women's,<br>neonatal and<br>perinatal<br>mortality, and<br>stillbirth                                                                          | Integrated<br>maternal and<br>neonatal health<br>program: multiple<br>interventions to<br>address delays in<br>accessing care,<br>provide<br>emergency<br>obstetric care and<br>manage<br>complications*. | Pregnancy and<br>childbirth<br><br>Pregnant<br>women and<br>newborns                                                                                                      | Statistically<br>significant declines in<br>Maternal mortality,<br>Stillbirth, Neonatal<br>mortality, and<br>Perinatal mortality<br>rates.                                                                                     | Yes:<br>Improvements in<br>maternal and<br>newborn survival<br>observed.                                                                                                 | Facilitators:<br>Promoting local<br>ownership                                                                  |
| Oguntunde et<br>al <sup>25</sup> (2018)<br><br>Nigeria          | Jigawa, Kaduna<br>and Kano (NW)<br>urban<br>health facility                                | Post intervention<br>analysis<br>(qualitative<br>study):<br>To assess the<br>Facility Health<br>Committees<br>established in<br>three states in<br>northern Nigeria<br>as a platform to<br>improve the<br>quality of<br>maternal and<br>child health<br>services. | Facility Health<br>committees.*                                                                                                                                                                           | Across the<br>continuum of<br>care<br><br>Facility health<br>committee<br>members:<br>facility health<br>providers<br>facility clients<br>including<br>pregnant<br>women. | Committee members,<br>health providers, and<br>facility clients all<br>agree that the<br>committees have a<br>tangible positive<br>effect on the provision<br>of maternal and child<br>health services and<br>quality of care. | Yes: Facility<br>health committees<br>appear to have a<br>positive influence<br>on quality of<br>maternal and<br>child health<br>services in the<br>selected facilities. | Barriers: Inadequate<br>funding.<br><br>Facilitators: Gaining<br>trust and support of<br>community<br>members. |

|                                                           |                                       |                                                                                                                                                                                           |                                                                                                             |                                                                                                                 |                                                                                                                                                                                                                                        |                                                                                                                             |                                                                                                                                                                      |
|-----------------------------------------------------------|---------------------------------------|-------------------------------------------------------------------------------------------------------------------------------------------------------------------------------------------|-------------------------------------------------------------------------------------------------------------|-----------------------------------------------------------------------------------------------------------------|----------------------------------------------------------------------------------------------------------------------------------------------------------------------------------------------------------------------------------------|-----------------------------------------------------------------------------------------------------------------------------|----------------------------------------------------------------------------------------------------------------------------------------------------------------------|
| Alexander et al <sup>26</sup> (2018)<br><br>International | Oyo (SW) rural community              | RCT:<br>To compare pregnancy outcomes in women exposed to household air pollution from wood and kerosene fuel stoves to women who received ethanol CleanCook stoves.                      | CleanCook ethanol Stoves [plus training on how to use the stove and prevent the dangers of smoke exposure]. | Pregnancy<br><br>Pregnant women                                                                                 | Improved birth outcomes (mean birth weight, average gestational age at birth) were higher in ethanol stove users. Perinatal mortality (stillbirths and neonatal deaths) was twice as high in controls compared to ethanol stove users. | Yes: Transition from traditional biomass/ kerosene fuel to ethanol among pregnant women reduced adverse pregnancy outcomes. | Facilitators:<br>Adequate education on the use of intervention.                                                                                                      |
| Abegunde et al <sup>27</sup> (2015)<br><br>Nigeria        | Bauchi (NE) rural health facility     | Program evaluation (outcome):<br>To estimate the impact of the MNCH/FP/RH interventions implemented in Bauchi State and to evaluate the progress towards the achievement of MDGs 4 and 5. | Integrated MNCH/FP/RH program. *                                                                            | Across the continuum of care<br><br>Women of childbearing age (15-49 years).                                    | Maternal, newborn and child health indicators in the continuum of care neither reached the national average nor attained the 90% globally recommended coverage level.                                                                  | No: For several of the indicators, a modest improvement from baseline was found following the program.                      | Barriers: Inadequate financing, inadequate essential human resources for implementation.<br><br>Facilitators:<br>Involvement of community members in implementation. |
| Cannon et al <sup>28</sup> (2017)<br><br>International    | Sokoto (NW) urban and rural community | Post intervention assessment (qualitative):<br>To assess the perceived successes and benefits of using Misoprostol and Chlorhexidine as                                                   | Drugs/medication<br>Use of Misoprostol and Chlorhexidine gel. *                                             | Childbirth/Post natal newborn<br><br>Mothers and husbands health workers health service providers policy makers | Community-based distribution of Misoprostol and Chlorhexidine intervention was successful with overwhelming support for the use of the two drugs among users,                                                                          | Yes.                                                                                                                        | Barriers: Stocks outs, shortage of staff, socio-cultural barriers, myths, and fears about the medication.<br><br>Facilitators: Early advocacy with                   |

|                                                            |                                                                 |                                                                                                                                                                     |                                                              |                                                                            |                                                                                                                                                                                                                                                                                                                                                                        |                                                                                                                                                                                                                                                                               |                                                                                                                          |
|------------------------------------------------------------|-----------------------------------------------------------------|---------------------------------------------------------------------------------------------------------------------------------------------------------------------|--------------------------------------------------------------|----------------------------------------------------------------------------|------------------------------------------------------------------------------------------------------------------------------------------------------------------------------------------------------------------------------------------------------------------------------------------------------------------------------------------------------------------------|-------------------------------------------------------------------------------------------------------------------------------------------------------------------------------------------------------------------------------------------------------------------------------|--------------------------------------------------------------------------------------------------------------------------|
|                                                            |                                                                 | reported by different types of key stakeholders.                                                                                                                    |                                                              |                                                                            | their spouses, and members of drug distribution system                                                                                                                                                                                                                                                                                                                 |                                                                                                                                                                                                                                                                               | government and broader stakeholder engagement.                                                                           |
| Findley et al <sup>29</sup><br>(2013)<br><br>International | Katsina, Yobe, Zamfara (NE and NW)<br>urban and rural community | Program evaluation (quasi-experimental design):<br>Examine the extent to which the intervention program has facilitated improvements in key behaviours and outcomes | Integrated maternal, newborn, and child health program*      | Across the continuum of care<br><br>Women of childbearing age 15-49 years. | Between baseline and follow-up, the rates of anti-tetanus vaccination and early breast feeding increased. Also, more newborns were checked by trained health workers. Women were performing more of the critical newborn care activities at follow-up, relied less on TBAs for health advice, and more on trained health workers. Infant and child mortality declined. | Yes: In the context of ongoing improvements to the primary health care system, the participatory and community-based interventions focusing on improved newborn and infant care were effective at changing infant care practices and outcomes in the intervention communities | Facilitators:<br>Integrated approach of program, quality improvement at facilities, community participation and support. |
| Ishola et al <sup>30</sup><br>(2017)<br><br>Nigeria        | Kano and Zamfara (NW)<br>urban and rural community              | Program evaluation (outcome):<br>To characterize the effects of volunteer household counsellors (VHCs) upon improving                                               | ACCESS/Maternal and Child Health Integrated Program (MCHIP)* | Pregnancy<br><br>Pregnant women/mother                                     | Mothers who received counselling had better knowledge of BPCR compared to women who did not. Mothers who received counselling had greater odds of recognising danger                                                                                                                                                                                                   | Yes: VHCs have substantially increased knowledge of BPCR and danger signs among women.                                                                                                                                                                                        |                                                                                                                          |

|                                                             |                                         |                                                                                                                                                             |                                                                   |                                                |                                                                                                                                                                                                                                                                                                               |                                                                                                                                                                          |                                                                                                                     |
|-------------------------------------------------------------|-----------------------------------------|-------------------------------------------------------------------------------------------------------------------------------------------------------------|-------------------------------------------------------------------|------------------------------------------------|---------------------------------------------------------------------------------------------------------------------------------------------------------------------------------------------------------------------------------------------------------------------------------------------------------------|--------------------------------------------------------------------------------------------------------------------------------------------------------------------------|---------------------------------------------------------------------------------------------------------------------|
|                                                             |                                         | knowledge of birth preparedness and complication readiness (BPCR)                                                                                           |                                                                   |                                                | signs during delivery and post-partum.                                                                                                                                                                                                                                                                        |                                                                                                                                                                          |                                                                                                                     |
| Orobaton et al <sup>31</sup><br>(2016)<br><br>International | Sokoto state (NW)<br>rural<br>community | Program evaluation (process and outcome):<br>To evaluate the community distributed SP program.                                                              | Community distribution of SP for Malaria-In-Pregnancy*            | Pregnancy<br><br>Pregnant women                | Up to 95% coverage of SP1 doses in the intervention LGAs compared to 26% in the counterfactual LGAs. Measurable SP3+ coverage was 45% in the intervention and 0% in the counterfactual. Increased doses of IPTp-SP were associated with increases in newborn head circumference and lower odds of stillbirth. | Yes: Scale up and delivery of high impact IPTp-SP interventions in low resource malaria endemic settings, where few women access facility-based maternal health services | Facilitators: Authentic community ownership, integrated approach of program, community involvement, peer influence. |
| Ezugwu et al <sup>32</sup><br>(2014)<br><br>Nigeria         | Enugu (SE)<br>urban<br>health facility  | Post intervention assessment (retrospective review of program data):<br>Evaluating the impact of the adoption of this evidence-based guidelines on maternal | Promotion of Evidence based management of obstetric complications | Pregnancy and childbirth<br><br>Pregnant women | There was a significant reduction in case fatality rate for both eclampsia (15.8% vs. 2.7%; P = 0.024, odds ratio = 5.84) and Postpartum haemorrhage (13.6% vs. 2.5% P value = 0.023, odds ratio = 5.5). There was 43.5% reduction in the MMR                                                                 | Yes: Implementation of evidence-based guidelines/ intervention is possible in low resource settings and contributes to a significant reduction in the maternal deaths.   |                                                                                                                     |

|                                                    |                                                  |                                                                                                                                                                                                  |                                                                                 |                                                                 |                                                                                                                                                                                                                                                                                                               |                                                                                                                                                                                                                              |                                                                                                                                                                                                                                                        |
|----------------------------------------------------|--------------------------------------------------|--------------------------------------------------------------------------------------------------------------------------------------------------------------------------------------------------|---------------------------------------------------------------------------------|-----------------------------------------------------------------|---------------------------------------------------------------------------------------------------------------------------------------------------------------------------------------------------------------------------------------------------------------------------------------------------------------|------------------------------------------------------------------------------------------------------------------------------------------------------------------------------------------------------------------------------|--------------------------------------------------------------------------------------------------------------------------------------------------------------------------------------------------------------------------------------------------------|
|                                                    |                                                  | mortality reduction.                                                                                                                                                                             |                                                                                 |                                                                 | with the intervention (488 vs. 864/100 000 live births P = 0.039, odds ratio = 1.77).                                                                                                                                                                                                                         |                                                                                                                                                                                                                              |                                                                                                                                                                                                                                                        |
| Orobaton et al <sup>33</sup> (2015)<br><br>Nigeria | Sokoto (NW) rural community                      | Post program evaluation (retrospective analysis of program data): To evaluate the impact of scaling up the use of chlorhexidine digluconate 7.1% gel using a community-based distribution system | Drugs/medication : Chlorhexidine digluconate 7.1% gel plus misoprostol tablets* | Childbirth and Postnatal (newborn).<br><br>Mothers and newborns | Of newborns that received the intervention (gel), 99.97% survived past 28 days.                                                                                                                                                                                                                               | Yes: Community led efforts to scale up the use of a single dose application of chlorhexidine digluconate 7.1% gel and instructions on the hygienic care of the cord after application led to high rates of newborn survival. | Barriers: Inadequate financing/heavy reliance on donor funding, problems with supply/availability of commodities.<br><br>Facilitators: Community ownership and active involvement of men, evidence-based advocacy to government and community leaders. |
| Disu et al <sup>34</sup> (2015)<br><br>Nigeria     | All six geopolitical zones urban health facility | Post intervention assessment (cross sectional study): To evaluate the post-training neonatal resuscitation activities among doctors, nurses, and midwives across Nigeria                         | Capacity Building: Neonatal Resuscitation training                              | Postnatal (newborn)<br><br>Health workers                       | Over a five-year period (2008 to 2012), a total of 727 health workers were trained. At baseline, delivery attendance rates were 11 per doctor and 9 per nurse/midwife. These rates increased to 30 per doctor and 47 per nurse in 2012. Over 90% of doctors and nurses successfully used bag and mask to help | Yes: Neonatal resuscitation training in Nigeria is well-subscribed, successful and the frequency and scope of step-down trainings are good.                                                                                  |                                                                                                                                                                                                                                                        |

|                                             |                                               |                                                                                                                                                                                                              |                                                                                                                            |                                                                             |                                                                                                                                                                                                                                                                                                                                          |                                                                                                                                                                      |                                                                                                     |
|---------------------------------------------|-----------------------------------------------|--------------------------------------------------------------------------------------------------------------------------------------------------------------------------------------------------------------|----------------------------------------------------------------------------------------------------------------------------|-----------------------------------------------------------------------------|------------------------------------------------------------------------------------------------------------------------------------------------------------------------------------------------------------------------------------------------------------------------------------------------------------------------------------------|----------------------------------------------------------------------------------------------------------------------------------------------------------------------|-----------------------------------------------------------------------------------------------------|
|                                             |                                               |                                                                                                                                                                                                              |                                                                                                                            |                                                                             | babies breathe in the post-training period.                                                                                                                                                                                                                                                                                              |                                                                                                                                                                      |                                                                                                     |
| Kwast <sup>35</sup> (1996)<br>International | Oyo and Bauchi (SW, NE) urban health facility | Program evaluation (outcome): To describe selected MotherCare demonstration projects in the first 5 years between 1989 and 1993 in Bolivia, Guatemala, Indonesia, and Nigeria                                | Safe Motherhood Project: Lifesaving skills training for midwives and interpersonal communication skills for all providers* | Childbirth and Postnatal (mother and newborn).<br><br>Professional midwives | Significant reductions in postpartum haemorrhage and in prolonged labour; and a decline in intrapartum stillbirths, postpartum sepsis and broken-down episiotomies was observed. Midwives performed more than half of all vacuum extractions. Some reductions in maternal death were seen.                                               | Yes: The upgrading of skills together with provision of supplies and a supportive management policy ultimately saved lives through an enhanced delivery environment. |                                                                                                     |
| Eluwa et al <sup>36</sup> (2018)<br>Nigeria | Kano (NW) urban health facility               | Quasi-experimental design: To assess the effect of centering pregnancy group (CPG) antenatal care on the uptake of antenatal care (ANC), facility delivery and immunization rates for infants in Kano state. | Centering Pregnancy-group (CPG) prenatal care program                                                                      | Pregnancy<br><br>Pregnant women 15–49 years of age and newborns.            | Statistically significant improvement in proportion of women attending ANC at least once in the 2nd and 3rd trimester in intervention versus control group. More women in the intervention group had a health facility delivery, were more likely to immunize babies at 6 and 14 weeks and more likely to use postnatal health services. | Yes: Intervention had a positive effect on the use of antenatal services, facility delivery and postnatal services.                                                  | Barriers: lack of trust in health system, strong influence of socio-cultural beliefs and practices. |

|                                                           |                                              |                                                                                                                                                                                           |                                                                            |                                                         |                                                                                                                                                                                                                                                        |                                                                                                                                                                            |                                                                                                                |
|-----------------------------------------------------------|----------------------------------------------|-------------------------------------------------------------------------------------------------------------------------------------------------------------------------------------------|----------------------------------------------------------------------------|---------------------------------------------------------|--------------------------------------------------------------------------------------------------------------------------------------------------------------------------------------------------------------------------------------------------------|----------------------------------------------------------------------------------------------------------------------------------------------------------------------------|----------------------------------------------------------------------------------------------------------------|
| Sam-Agudu et al <sup>37</sup> (2017)<br><br>Nigeria       | Nassarawa and FCT (NC) urban health facility | Prospective matched cohort study:<br>Investigate the impact of a structured peer support intervention on EID presentation and secondarily on HIV-free survival among HIV-exposed infants. | Mentor Mothers program*                                                    | Postnatal (newborn)<br><br>Mothers and newborns         | Exposure to MM support was associated with higher odds of timely EID presentation among infants, compared with routine PS (adjusted odds ratios = 3.7, 95% confidence interval: 2.8 to 5.0).                                                           | Yes: Closely supervised, organized MM support significantly improved presentation for EID among HIV-exposed infants and uptake of EID testing in a rural Nigerian setting. | Facilitators: supportive supervision and quality of interactions between clients and mentors.                  |
| Qureshi et al <sup>38</sup> (2011).<br><br>International  | Sokoto (NW) rural community                  | Randomised community trial:<br>To assess the impact of community volunteers to promote exclusive breastfeeding.                                                                           | Counselling on EBF by community volunteers*                                | Postnatal (mothers and newborn).<br><br>Nursing mothers | After counselling, the proportion of mothers with intention to EBF (a knowledge score > 50%) increased significantly and women who were exclusively breastfeeding increased. A significant proportion of women agreed EBF was beneficial to the child. | Yes: Counselling served as a useful strategy for promoting the duration of EBF for six months and for developing support systems for nursing mothers.                      |                                                                                                                |
| Davies-Adetugbo et al <sup>39</sup> (1997)<br><br>Nigeria | Osun (SW) rural community                    | Pre/post intervention assessment:<br>To evaluate the impact of training community extension health workers on                                                                             | Training of community extension health workers on promoting breastfeeding* | Postnatal (mothers and newborn)<br><br>Pregnant women   | Significant increase in early initiation of breastfeeding by mothers who delivered at perinatal facilities staffed by ISBFP-trained PHC workers. 32% of the                                                                                            | Yes: The results suggest that the training enhanced the health workers' knowledge about EBF and attitudes towards                                                          | Barriers: Negative attitudes towards EBF.<br><br>Facilitators: Community participation and linkages, trainings |

|                                                         |                                                            |                                                                                                                                                                           |                                                                      |                                 |                                                                                                                                                                                                                                                                                                                                                  |                                                                                                                                                                                   |                                                                                                                   |
|---------------------------------------------------------|------------------------------------------------------------|---------------------------------------------------------------------------------------------------------------------------------------------------------------------------|----------------------------------------------------------------------|---------------------------------|--------------------------------------------------------------------------------------------------------------------------------------------------------------------------------------------------------------------------------------------------------------------------------------------------------------------------------------------------|-----------------------------------------------------------------------------------------------------------------------------------------------------------------------------------|-------------------------------------------------------------------------------------------------------------------|
|                                                         |                                                            | breastfeeding knowledge and practice among mothers in rural communities                                                                                                   |                                                                      |                                 | deliveries in intervention area reported early initiation of breastfeeding (within 30min of delivery) compared with only 6% in the control area. In all instances, trained PHC workers had better knowledge of and attitudes towards breastfeeding and made the correct recommendations on all aspects of breastfeeding than untrained controls. | breastfeeding, and that these workers have had a positive impact on at least one aspect of breastfeeding behaviour in the community: mothers' timely initiation of breastfeeding. | conducted in local language.                                                                                      |
| Ojofeitimi et al <sup>40</sup> (1982)<br><br>Nigeria    | Oyo (SW) urban health facility                             | Pre/post intervention assessment: To investigate the effect of regular nutritional counselling and fear mechanism techniques to motivate pregnant women to consume foods. | Nutritional counselling*                                             | Pregnancy<br><br>Pregnant women | The experimental group had a significant pattern of monthly weight gain ( $P < 0.02$ ) and heavier babies ( $P < 0.01$ ) than the control group.                                                                                                                                                                                                 | Yes: Nutritional counselling served to correct erroneous assumptions and aversions about food.                                                                                    |                                                                                                                   |
| Danmusa et al <sup>41</sup> (2014)<br><br>International | All six geopolitical zones urban and rural health facility | Program evaluation (process): To describe the findings of program                                                                                                         | Magnesium sulphate for the treatment of pre-eclampsia and eclampsia* | Pregnancy<br><br>Pregnant women | A significant drop in the case fatality rate due to eclampsia from 20.9% before the start of services to 2.3% after was observed in                                                                                                                                                                                                              | Yes: Reductions in deaths due to eclampsia, and states have collectively made significant                                                                                         | Barriers: High frequency of home births, resistance to change from health providers, inadequate number of trained |



|                                                                                  |                                                                          |                                                                                                                                                                                                  |                                                                                                                |                                                                           |                                                                                                                                                                                                |                                                                                                                                                                                                                               |                                                                                                                                                                                     |
|----------------------------------------------------------------------------------|--------------------------------------------------------------------------|--------------------------------------------------------------------------------------------------------------------------------------------------------------------------------------------------|----------------------------------------------------------------------------------------------------------------|---------------------------------------------------------------------------|------------------------------------------------------------------------------------------------------------------------------------------------------------------------------------------------|-------------------------------------------------------------------------------------------------------------------------------------------------------------------------------------------------------------------------------|-------------------------------------------------------------------------------------------------------------------------------------------------------------------------------------|
|                                                                                  |                                                                          | evaluation, including the challenges encountered while implementing the projects, the successes achieved, and existing opportunities for future scaling up of the services across the country.   |                                                                                                                |                                                                           | the lead state, Kano. A significant case fatality drop (from 15.1% to 2.7%) across the six state hospitals lends local legitimacy to the use of the drug to treat pre-eclampsia and eclampsia. | progress towards the full integration of the use of magnesium sulfate into the Nigerian healthcare system.                                                                                                                    | staff for implementation, poor quality of services.<br><br>Facilitators: Advocacy to stakeholders, community involvement, supportive national health policies, enhanced monitoring. |
| Maternal, Newborn and Child Health Programme <sup>42</sup> (2017)<br><br>Nigeria | Jigawa, Kaduna, Kano, Katsina, Yobe, Zamfara (NW and NE) rural community | Program process and outcome evaluation: Evaluation of a program to increase access and uptake to Reproductive, Maternal, Newborn and Child Health (RMNCH) services for hard-to-reach communities | Integrated MNCH outreach services: increasing demand and access to MNCH services in hard-to-reach communities* | Across the continuum of care.<br><br>Women and young married adolescents. | 271 hard-to-reach communities accessed with integrated RMNCH outreach services.                                                                                                                | Yes: Prior to intervention, the outreach teams were not meeting the full needs for maternal and child health in communities. The program has ensured a continuum of care for MNCH services, even in the most rural locations. | Facilitators: Community engagement, community needs assessment, support from states and national governments.                                                                       |
| Maternal and Child Survival Program <sup>43</sup> (2018)<br><br>Nigeria          | Kogi, Ebonyi (NC and SE) rural health facility                           | Post program outcome evaluation: To reduce newborn mortality through the                                                                                                                         | Provision of key newborn interventions: neonatal resuscitation, KMC etc*                                       | Postnatal (newborn)<br><br>newborns                                       | ENC defined as provision of skin-to-skin contact after birth, clean cord care with or without CHX, and early initiation of breastfeeding -within                                               | Yes: MCSP's newborn health strategies have promoted the scale up of high impact interventions that                                                                                                                            | Facilitators: Incorporation into local authority's strategy health plan, demand creation activities, staff retention.                                                               |

|                                                                                  |                                                                       |                                                                                                                                                                |                                                      |                                                                   |                                                                                                                                                                                                                                                                                                                                    |                                                                                                                                                                                                           |                                                                                                               |
|----------------------------------------------------------------------------------|-----------------------------------------------------------------------|----------------------------------------------------------------------------------------------------------------------------------------------------------------|------------------------------------------------------|-------------------------------------------------------------------|------------------------------------------------------------------------------------------------------------------------------------------------------------------------------------------------------------------------------------------------------------------------------------------------------------------------------------|-----------------------------------------------------------------------------------------------------------------------------------------------------------------------------------------------------------|---------------------------------------------------------------------------------------------------------------|
|                                                                                  |                                                                       | implementation of key newborn interventions.                                                                                                                   |                                                      |                                                                   | 30 minutes of birth increased from about 26% to 92%. Over 90% of asphyxiated babies in intervention states received successful neonatal resuscitation. Uptake and use of CHX increased from 0% at baseline to about 92%.                                                                                                           | address the three major causes of newborn morbidity and mortality in Nigeria.                                                                                                                             |                                                                                                               |
| Maternal and Child Survival Program <sup>44</sup> (2018)<br><br>Nigeria          | Kogi, (NC and SE) rural health facility                               | Post program outcome evaluation: To increase voluntary family planning uptake among postpartum women delivering in health facilities in Kogi and Ebonyi states | Integrated Post-Partum Family Planning Intervention* | Postnatal (mothers)<br><br>Postpartum women                       | PPFP services were initiated in 233 health facilities, with 637 health care workers empowered to provide PPFP services. This increased the pool of competent service providers for both post-partum FP and long-acting reversible contraceptives (LARC). There was improved strategic planning for family planning in both states. | Yes: Trends show contraceptive access for voluntary post-partum family planning has increased in both states, despite initial low contraceptive use prevalence with an estimated 25k pregnancies averted. | Facilitators: Availability of competent health providers, effective provision of health information to women. |
| Maternal, Newborn and Child Health Programme <sup>45</sup> (2017)<br><br>Nigeria | Jigawa, Kano, Kaduna, Katsina, Yobe, Zamfara (NW, NE) rural community | Program outcome evaluation: To improve health message delivery to men and encourage their active role in                                                       | Male Support Groups*                                 | Across the continuum of care<br><br>Males in intervention states. | Over 1500 support groups established and supported. Over 4,000 interpersonal communication sessions held.                                                                                                                                                                                                                          | Yes.                                                                                                                                                                                                      | Facilitators: Active community/stakeholder engagement, community ownership.                                   |

|                                                                                  |                                                                             |                                                                                                                                                                                                         |                                                         |                                                                                             |                                                                                                                                                                          |                                                                                                                                          |                                                                                                                                       |
|----------------------------------------------------------------------------------|-----------------------------------------------------------------------------|---------------------------------------------------------------------------------------------------------------------------------------------------------------------------------------------------------|---------------------------------------------------------|---------------------------------------------------------------------------------------------|--------------------------------------------------------------------------------------------------------------------------------------------------------------------------|------------------------------------------------------------------------------------------------------------------------------------------|---------------------------------------------------------------------------------------------------------------------------------------|
|                                                                                  |                                                                             | women and child health.                                                                                                                                                                                 |                                                         |                                                                                             |                                                                                                                                                                          |                                                                                                                                          |                                                                                                                                       |
| Maternal, Newborn and Child Health Programme <sup>46</sup> (2016)<br><br>Nigeria | Jigawa, Kano, Kaduna, Katsina, Yobe, Zamfara (NW, NE) rural health facility | Program outcome evaluation:<br>To assess outcome of an intervention increasing the uptake of long-acting reversible contraception services in primary Health centres through Competency-based Training. | Integrated Competency Based Training for health workers | Pre-pregnancy<br><br>Women of childbearing age                                              | 851 health care providers have been trained in the integrated package of reproductive, maternal, newborn and child health (RMNCH), including LARC services.              | Yes.                                                                                                                                     | Facilitators: Demand creation activities, good commodity supply chain.                                                                |
| Abegunde et al <sup>47</sup> (2015)<br><br>Nigeria                               | Sokoto (NW). urban and rural community and health facility                  | Program evaluation-outcome:<br>To assess the impact of interventions implemented between 2012 and 2013.                                                                                                 | Integrated management of (MNCH)/FP/reproductive health* | Across the continuum of care<br><br>women, newborns and children under 5yrs of age          | None of the nine indicators associated with the continuum of maternal, neonatal, and childcare satisfied the recommended 90% coverage target for achieving MDGs 4 and 5. | No: The majority of the LGAs did not meet intended targets and require intensified program/intervention.                                 | Barriers: Low quality data for planning the program.                                                                                  |
| Mckaig et al <sup>48</sup> (2009)<br><br>International                           | Kano (NW) urban and rural community and health facility                     | Program outcome evaluation (qualitative study):<br>To examine integrated MNCH/FP services as a means towards meeting the family planning                                                                | Scale-up of postpartum family planning*                 | Across the continuum of care<br><br>policymakers, health care providers, community members. | Significant increases in number of FP clients and method use per site following the implementation of the program.                                                       | Yes: The approach systematically increases MNCH/FP integration and had a positive effect on service use, particularly FP, even in a very | Barriers: Negative religious/community attitudes towards MNCH services.<br><br>Facilitators: Service integration, community linkages. |

|                                                  |                                                           |                                                                                                                                                                                             |                                                                                                           |                                                                         |                                                                                                                                                                                                                                                                                                                                             |                                                                                                                                                                       |  |
|--------------------------------------------------|-----------------------------------------------------------|---------------------------------------------------------------------------------------------------------------------------------------------------------------------------------------------|-----------------------------------------------------------------------------------------------------------|-------------------------------------------------------------------------|---------------------------------------------------------------------------------------------------------------------------------------------------------------------------------------------------------------------------------------------------------------------------------------------------------------------------------------------|-----------------------------------------------------------------------------------------------------------------------------------------------------------------------|--|
|                                                  |                                                           | and reproductive health needs of women in the postpartum period.                                                                                                                            |                                                                                                           |                                                                         |                                                                                                                                                                                                                                                                                                                                             | conservative environment.                                                                                                                                             |  |
| Kana et al <sup>49</sup> (2015)<br>Nigeria       | countrywide urban and rural health facility and community | Systematic review:<br>To describe and indirectly measure the effect of the Maternal, Newborn and Child Health (MNCH) interventions implemented in Nigeria from 1990 to 2014                 | Interventions for maternal and child health                                                               | Across the continuum of care<br>mothers, newborns, under-five children. | The national MMR shows a consistent reduction (Annual Percentage Change (APC) = -3.10%, 95% CI: -5.20 to -1.00 %) with marked decrease in the slope observed in the period with a cluster of published studies (2004–2014).                                                                                                                 | Yes: The development of MNCH policies, implementation and publication of interventions corresponds with the downward trend of maternal and child mortality in Nigeria |  |
| Abdul-Hadi et al <sup>50</sup> (2013)<br>Nigeria | Gombe (NE) rural community                                | Intervention assessment (quasi-experimental design):<br>To demonstrate effectiveness of Community Based Distribution of Injectable Contraceptives Using Community Health Extension Workers. | Community based distribution (CBD) of injectable contraceptives using community health extension workers* | Pre-pregnancy                                                           | The CBD mean couple years of protection (CYP) for injectables-depomedroxy-progesterone acetate (DMPA) and norethisterone enantate was higher (27.72 & 18.16 respectively) than the facility CYP (7.21 & 5.08 respectively) (p < 0.05) with no injection related complications. The CBD's mean CYP for all methods was also found to be four | Yes: Community based distribution of contraceptives was successful.                                                                                                   |  |

|                                                       |                                                                           |                                                                                                                                                                                                                                                                                                |                                                                                       |                                                           |                                                                                                                                                                                                                                                                                                                                                                           |                                                                                                                                                                                                    |                                                                  |
|-------------------------------------------------------|---------------------------------------------------------------------------|------------------------------------------------------------------------------------------------------------------------------------------------------------------------------------------------------------------------------------------------------------------------------------------------|---------------------------------------------------------------------------------------|-----------------------------------------------------------|---------------------------------------------------------------------------------------------------------------------------------------------------------------------------------------------------------------------------------------------------------------------------------------------------------------------------------------------------------------------------|----------------------------------------------------------------------------------------------------------------------------------------------------------------------------------------------------|------------------------------------------------------------------|
|                                                       |                                                                           |                                                                                                                                                                                                                                                                                                |                                                                                       |                                                           | times higher (11.65) than that generated in health facilities (2.86) ( $p < 0.05$ )                                                                                                                                                                                                                                                                                       |                                                                                                                                                                                                    |                                                                  |
| Speizer et al <sup>51</sup> (2014)<br>International   | Kaduna, Abuja-FCT, Kwara, Oyo and Edo (NC, NW, SS and SW) urban community | Longitudinal evaluation of program/intervention:<br>To examine the role of demand generation activities undertaken as part of the Urban RH Initiative programs-seeking to increase modern contraceptive use by 20 percentage points in targeted urban areas, particularly among the urban poor | Family planning demand creation and supply side interventions.*                       | Pre-pregnancy<br>Women of childbearing age (15-49 years)  | Outreach by community health or family planning workers as well as local radio programs was significantly associated with increased use of modern contraceptive methods. Television programs had a significant effect on modern contraceptive use. Program slogans and materials distributed across the cities were also significantly associated with modern method use. | Yes: Multi-level targeted demand generation activities contributed to increasing modern contraceptive use in urban areas, leading to improved access to maternal and reproductive health services. | Facilitators: community engagement.                              |
| Hotchkiss et al <sup>52</sup> (2011)<br>International | Countrywide urban and rural health facility                               | Post program evaluation-cross sectional study:<br>To investigate whether the expansion of the role of private providers in the provision of modern contraceptive                                                                                                                               | Expansion of the private commercial sector in the provision of contraceptive supplies | Pre-pregnancy<br>Women of childbearing age (15-49 years). | Proportion of women who report obtaining the contraceptive supplies from the commercial private sector increased by 69 percent over the 1999 to 2008 period. In Nigeria, the private commercial sector became the most                                                                                                                                                    | Yes: The expansion of the private commercial sector supply of contraceptives decreased inequities in the use of modern contraceptives in Nigeria.                                                  | Facilitators: social marketing of intervention to create demand. |

|                                                     |                                                                    |                                                                                                                                                                                                      |                                                                                                                  |                                                           |                                                                                                                                                                                                                                                                                                                                          |                                                                                                                                                                                         |                                                                                                                                                                                                                                                                                                                                  |
|-----------------------------------------------------|--------------------------------------------------------------------|------------------------------------------------------------------------------------------------------------------------------------------------------------------------------------------------------|------------------------------------------------------------------------------------------------------------------|-----------------------------------------------------------|------------------------------------------------------------------------------------------------------------------------------------------------------------------------------------------------------------------------------------------------------------------------------------------------------------------------------------------|-----------------------------------------------------------------------------------------------------------------------------------------------------------------------------------------|----------------------------------------------------------------------------------------------------------------------------------------------------------------------------------------------------------------------------------------------------------------------------------------------------------------------------------|
|                                                     |                                                                    | supplies is associated with increased horizontal inequity in modern contraceptive use.                                                                                                               |                                                                                                                  |                                                           | important source of contraceptive supplies to women in poorest wealth quintile group. In addition, women in better off wealth quintiles also became increasingly reliant on the private commercial sector.                                                                                                                               |                                                                                                                                                                                         |                                                                                                                                                                                                                                                                                                                                  |
| Fayemi et al <sup>53</sup><br>(2011)<br><br>Nigeria | Bauchi, Gombe, Plateau, Edo, Ogun (NC, NE, SS, SW) rural community | Longitudinal evaluation of program/ intervention: To improve maternal mortality reduction through increasing contraceptive uptake in 10 rural local government areas (LGAs) in five Nigerian states. | Community Based Delivery (CBD) of non-prescriptive family planning services and the treatment of minor ailments* | Pregnancy<br><br>Women of childbearing age (15-49 years). | Increase in the proportion of community members who had utilised FP commodities at all, from 28% at baseline to 49%, and an increase in the proportion of current contraceptive users from 16% at baseline to 37%. An increase in knowledge of common family planning methods, including male and female condoms, injectables and pills. | Yes: A community-based distribution approach played a critical role in enhancing access to Reproductive Health and Family Planning information and services in the project communities. | Barriers: Inadequate financial support for program, poor support from spouses of participating women, misconceptions of community members about family planning.<br><br>Facilitators: Advocacy and community engagement, involvement of males in implementation, demand creation activities, regular monitoring, and evaluation. |

|                                                  |                                                                                                               |                                                                                                                                                                                                                                             |                                                                               |                                                           |                                                                                                                                                                                                                                                                                                                                                                                                                                                                                                   |                                                                                                                                                        |                                                                                                                   |
|--------------------------------------------------|---------------------------------------------------------------------------------------------------------------|---------------------------------------------------------------------------------------------------------------------------------------------------------------------------------------------------------------------------------------------|-------------------------------------------------------------------------------|-----------------------------------------------------------|---------------------------------------------------------------------------------------------------------------------------------------------------------------------------------------------------------------------------------------------------------------------------------------------------------------------------------------------------------------------------------------------------------------------------------------------------------------------------------------------------|--------------------------------------------------------------------------------------------------------------------------------------------------------|-------------------------------------------------------------------------------------------------------------------|
| Ogu et al <sup>54</sup><br>(2012)<br><br>Nigeria | Kaduna, Kano, Adamawa, Bauchi, Borno, Taraba, and Katsina, Niger (NC, NE, NW) rural and urban health facility | Pre/Post-intervention (quasi-experimental):<br>To investigate the effectiveness of an intervention designed to improve the capacity of private medical doctors to offer quality abortion and postabortion care to women in northern Nigeria | Capacity-building workshops for health workers to improve post-abortion care. | Pregnancy<br><br>Women of childbearing age (15-49 years). | 458 trained private medical doctors and 839 nurses and midwives across 430 private clinics treated a total of 17,009 women over the 10 years of the project (about 2,100 women annually). Not a single case of abortion-related maternal mortality was recorded, with only 33 women experiencing mild complications, while none suffered major complications of abortion care. At the same time, there was a reduction in treatment cost and a doubling of the contraceptive uptake by the women. | Yes: Building the capacity of private medical providers reduced maternal morbidity and mortality associated with induced abortion in northern Nigeria. | Facilitators: detailed community needs assessment, community engagement, culturally appropriate health education. |
|--------------------------------------------------|---------------------------------------------------------------------------------------------------------------|---------------------------------------------------------------------------------------------------------------------------------------------------------------------------------------------------------------------------------------------|-------------------------------------------------------------------------------|-----------------------------------------------------------|---------------------------------------------------------------------------------------------------------------------------------------------------------------------------------------------------------------------------------------------------------------------------------------------------------------------------------------------------------------------------------------------------------------------------------------------------------------------------------------------------|--------------------------------------------------------------------------------------------------------------------------------------------------------|-------------------------------------------------------------------------------------------------------------------|

|                                                           |                                                             |                                                                                                                                                                                                                                    |                                                                                                               |                                                                  |                                                                                                                                                                                                                                                                                                                                                                 |                                                                                                                                                                                                                                                     |  |
|-----------------------------------------------------------|-------------------------------------------------------------|------------------------------------------------------------------------------------------------------------------------------------------------------------------------------------------------------------------------------------|---------------------------------------------------------------------------------------------------------------|------------------------------------------------------------------|-----------------------------------------------------------------------------------------------------------------------------------------------------------------------------------------------------------------------------------------------------------------------------------------------------------------------------------------------------------------|-----------------------------------------------------------------------------------------------------------------------------------------------------------------------------------------------------------------------------------------------------|--|
| Mens et al <sup>55</sup><br>(2011)<br><br>International   | Edo (SS)<br>rural<br>community                              | Pre/Post-<br>intervention<br>evaluation:<br>Explore peer to<br>peer education as<br>a tool in raising<br>knowledge of<br>MIP among<br>women of<br>childbearing age<br>and preventive<br>practices.                                 | Peer led health<br>education<br>campaign to<br>address malaria in<br>pregnancy*.                              | Pregnancy<br><br>Women of<br>childbearing<br>age: 15-49<br>years | The peer education<br>campaign had a<br>significant impact in<br>raising the level of<br>knowledge among the<br>women.                                                                                                                                                                                                                                          | Yes: The<br>knowledge of<br>women of<br>childbearing age<br>on malaria in<br>pregnancy and its<br>preventive<br>measures<br>increased.                                                                                                              |  |
| McNabb et al <sup>56</sup><br>(2015)<br><br>International | Abuja-FCT and<br>Nassarawa (NC)<br>urban<br>health facility | Pre/post<br>intervention<br>assessment:<br>To determine if<br>introducing the<br>mobile app: 1)<br>improved the<br>quality of ANC<br>services provided,<br>and 2) improved<br>client satisfaction<br>with ANC<br>services provided | An m-health<br>technology<br>intervention for<br>CHEWs/HCWs to<br>provide higher-<br>quality ANC<br>services* | Pregnancy<br><br>Pregnant<br>women                               | Overall, the<br>intervention was<br>associated with higher<br>quality of ANC<br>scores, with these<br>improvements<br>observed in multiple<br>domains of care,<br>including health<br>counselling, technical<br>services provided, and<br>quality of health<br>education. A<br>significant<br>improvement in<br>overall client<br>satisfaction was<br>observed. | Yes: Introduction<br>of a low-cost<br>mobile case<br>management and<br>decision support<br>application led to<br>behaviour<br>changes and<br>improved the<br>quality of services<br>provided by a<br>lower-level cadre<br>of healthcare<br>workers. |  |



|                                                      |                                                  |                                                                                                                                                                                                                                                                                     |                                                                                                                                                                                                          |                                                                                                                   |                                                                                                                                                                                                                                                                                                                                  |                                                                                                                                                                                                                                                                                                                                                                                                   |  |
|------------------------------------------------------|--------------------------------------------------|-------------------------------------------------------------------------------------------------------------------------------------------------------------------------------------------------------------------------------------------------------------------------------------|----------------------------------------------------------------------------------------------------------------------------------------------------------------------------------------------------------|-------------------------------------------------------------------------------------------------------------------|----------------------------------------------------------------------------------------------------------------------------------------------------------------------------------------------------------------------------------------------------------------------------------------------------------------------------------|---------------------------------------------------------------------------------------------------------------------------------------------------------------------------------------------------------------------------------------------------------------------------------------------------------------------------------------------------------------------------------------------------|--|
| Anyaehe et al <sup>57</sup><br>(2011)<br><br>Nigeria | Imo (SE)<br>rural<br>community                   | Longitudinal<br>evaluation of<br>program/intervention:<br>To assess the<br>impact of free<br>distribution of<br>ITN to pregnant<br>and nursing<br>mothers in a rural<br>community in<br>Nigeria, using<br>asymptomatic<br>malaria<br>parasitaemia as<br>the main outcome<br>measure | Roll Back Malaria<br>Campaign:<br>increased<br>availability of<br>ITNs for free<br>distribution to<br>pregnant women<br>and children<br>under at antenatal,<br>postnatal and<br>immunization<br>clinics* | Pregnancy and<br>postnatal<br>(mother and<br>newborn)<br><br>pregnant<br>women/nursing<br>mothers and<br>newborns | There was a sustained<br>but insignificant rise<br>in asymptomatic<br>malaria parasitaemia<br>post-distribution of<br>ITNs. Out of the 990<br>subjects recruited, 470<br>tested positive with<br>asymptomatic malaria<br>parasitaemia.                                                                                           | No: Although<br>ITN has a<br>capacity to reduce<br>mosquito bites<br>and malaria<br>prevalence, our<br>study showed a<br>non-significant<br>increase in<br>prevalence of<br>malaria after 6<br>months use in a<br>rural agrarian<br>Nigerian<br>community. This<br>suggests ITN<br>intervention must<br>be complemented<br>with awareness<br>campaigns and<br>other vector<br>control strategies. |  |
| Kabo et al <sup>58</sup><br>(2016)<br><br>Nigeria    | Bauchi State<br>(NE)<br>urban<br>health facility | Program<br>evaluation-<br>process and<br>outcome:<br>To assess whether<br>increased<br>compliance with<br>set performance<br>standards was<br>associated with<br>improved<br>maternal and<br>neonatal<br>outcomes                                                                   | Standards-Based<br>Management and<br>Recognition<br>(SBM-R)<br>program                                                                                                                                   | Across the<br>continuum of<br>care<br>Health service<br>providers                                                 | An increase in the<br>percentage of SBM-R<br>standards for MNH<br>achieved was<br>observed for 3 years<br>in succession after the<br>implementation of<br>SBM-R at all 23<br>facilities. In addition,<br>a decline in MMR and<br>NMR observed, along<br>with an increase in the<br>active management of<br>third stage of labour | Yes: Intervention<br>helped health<br>facilities achieve<br>more compliance<br>with MNH quality<br>of care<br>performance<br>standards, the use<br>of evidence-based<br>delivery practices<br>increased, leading<br>to decreases in<br>maternal and                                                                                                                                               |  |

|                                                 |                                                     |                                                                                                                                                                                                                                                                                           |                                                                                        |                                                         |                                                                                                                                                                                                                                                    |                                                                                                                                                                                |                                                                                                                                                             |
|-------------------------------------------------|-----------------------------------------------------|-------------------------------------------------------------------------------------------------------------------------------------------------------------------------------------------------------------------------------------------------------------------------------------------|----------------------------------------------------------------------------------------|---------------------------------------------------------|----------------------------------------------------------------------------------------------------------------------------------------------------------------------------------------------------------------------------------------------------|--------------------------------------------------------------------------------------------------------------------------------------------------------------------------------|-------------------------------------------------------------------------------------------------------------------------------------------------------------|
|                                                 |                                                     |                                                                                                                                                                                                                                                                                           |                                                                                        |                                                         | and a decline in the incidence of postpartum haemorrhage.                                                                                                                                                                                          | neonatal mortality.                                                                                                                                                            |                                                                                                                                                             |
| Chabikuli et al <sup>59</sup> (2009)<br>Nigeria | 71 health facilities across Nigeria urban and rural | Pre/post evaluation of program:<br>To measure changes in service utilization of a model integrating family planning with HIV counselling and testing (HCT), antiretroviral therapy (ART) and prevention of mother-to-child transmission (PMTCT) in the Nigerian public health facilities. | a referral-based, co-located family planning–HIV integration model                     | Pregnancy<br><br>Women of childbearing age: 15-49 years | Attendance at family planning clinics and mean couple year of protection increased significantly following integration of services. Attendance by men at family planning clinics was significantly higher among clients referred from HIV clinics. | Yes: Family planning–HIV integration using the referral model improved family planning service utilization by clients accessing HIV services due to increased referrals.       | Barriers: Low utilisation of intervention due to user fees, long waiting times.<br><br>Facilitators: decentralisation of services, integration of programs. |
| Kalu et al <sup>60</sup> (2012)<br>Nigeria      | Ebonyi (SE) urban health facility                   | Post-intervention evaluation:<br>To review the implementation of Post Abortion Care and effective linkage to other post abortion services in Ebonyi State University Teaching Hospital,                                                                                                   | Provision of post-abortion care and effective linkage to other post abortion services* | Pregnancy<br><br>Health service providers               | About a third of the PAC care providers had formal training for the implementation of the PAC services. The commonest intervention offered the patients was Manual Vacuum Aspiration (MVA). Only 15% of the caregivers were                        | No: There is poor integration between emergency post abortion care and other reproductive health services in the centre, resulting in high rates of maternal mortality related |                                                                                                                                                             |

|                                                           |                                                         |                                                                                                                                                                                                            |                                                                                      |                                  |                                                                                                                                                                                                                            |                                                                                                                                                                                                               |                                                             |
|-----------------------------------------------------------|---------------------------------------------------------|------------------------------------------------------------------------------------------------------------------------------------------------------------------------------------------------------------|--------------------------------------------------------------------------------------|----------------------------------|----------------------------------------------------------------------------------------------------------------------------------------------------------------------------------------------------------------------------|---------------------------------------------------------------------------------------------------------------------------------------------------------------------------------------------------------------|-------------------------------------------------------------|
|                                                           |                                                         | Abakaliki,<br>Nigeria                                                                                                                                                                                      |                                                                                      |                                  | satisfied with the linkage between PAC and the Family Planning services.                                                                                                                                                   | to abortion complications.                                                                                                                                                                                    |                                                             |
| Joseph et al <sup>61</sup><br>(2011)<br><br>International | Edo (SS)<br>urban<br>health facility                    | Cohort study:<br>To assess adverse pregnancy outcomes in HIV infected women who received highly active antiretroviral therapy (HAART) from early pregnancy compared with untreated-maternal HIV infection. | Administration of highly active antiretroviral therapy (HAART) from early pregnancy* | Pregnancy<br><br>Pregnant women  | Intrauterine growth restriction (IUGR), pre-term birth and caesarean delivery were significantly higher among women with untreated-HIV infection in pregnancy compared with women who received HAART from early pregnancy. | Yes: Provision of HAART significantly reduces adverse pregnancy outcomes.                                                                                                                                     |                                                             |
| Ojengbede et al <sup>62</sup><br>(2010)<br><br>Nigeria    | Kano, Katsina, Oyo (NW, SW)<br>urban<br>health facility | Pre/post intervention evaluation:<br>To examine the impact of the NASG on PPH at four referral facilities in Nigeria                                                                                       | Provision of non-pneumatic anti-shock garment (NASG) for PPH.*                       | Childbirth<br><br>Pregnant women | Mean measured blood loss decreased by 80% between pre-intervention and post-intervention phases. Mortality decreased from 18% pre-intervention to 6% in the NASG phase (RR = 0.31, 95% CI 0.15–0.64, p = 0.0007).          | Yes: The use of the NASG as part of standard management of PPH and hypovolemic shock at four referral facilities in Nigeria was associated with a significant reduction in blood loss and maternal mortality. | Facilitators: Frequent training, monitoring and evaluation. |

|                                                       |                                                 |                                                                                                                                                                                                                                                                                                                               |                                                                                                                            |                                                                                                            |                                                                                                                                                                                                                                                                                                                                                |                                                                                                                                                                                                              |                                                                                            |
|-------------------------------------------------------|-------------------------------------------------|-------------------------------------------------------------------------------------------------------------------------------------------------------------------------------------------------------------------------------------------------------------------------------------------------------------------------------|----------------------------------------------------------------------------------------------------------------------------|------------------------------------------------------------------------------------------------------------|------------------------------------------------------------------------------------------------------------------------------------------------------------------------------------------------------------------------------------------------------------------------------------------------------------------------------------------------|--------------------------------------------------------------------------------------------------------------------------------------------------------------------------------------------------------------|--------------------------------------------------------------------------------------------|
| Chiwuzie et al <sup>63</sup><br>(1997)<br><br>Nigeria | Edo (SS)<br>rural<br>community                  | Program<br>evaluation (quasi-<br>experimental<br>design):<br>To evaluate a<br>community<br>intervention<br>designed to<br>increase access to<br>emergency<br>obstetric care<br>qualitative<br>methods used                                                                                                                    | Emergency loan<br>funds to improve<br>access to obstetric<br>care                                                          | Pregnancy<br><br>Women of<br>childbearing<br>age: 15-49<br>years<br>community<br>leaders<br>health workers | Of the 13 clans<br>contacted, 12<br>successfully launched<br>loan funds. In the 1st<br>year of the operation,<br>83% of loans<br>requested by<br>women/families were<br>granted and 93% loans<br>were repaid in full. In<br>addition to being used<br>for transport, loans<br>were used to help pay<br>for drugs, blood, and<br>hospital fees. | Yes: The loan<br>fund improved<br>access and<br>reduced delay in<br>reaching care.                                                                                                                           | Facilitators:<br>community<br>involvement, quality<br>improvement of<br>health facilities. |
| Tukur et al <sup>64</sup><br>(2012)<br><br>Nigeria    | Kano (NW)<br>urban and rural<br>health facility | Evaluation of<br>program (quasi-<br>experimental):<br>To evaluate<br>whether a new<br>low-cost strategy<br>for the<br>introduction of<br>magnesium<br>sulphate<br>(MgSO <sub>4</sub> ) for<br>preeclampsia and<br>eclampsia in low-<br>resource areas<br>will result in<br>improved<br>maternal and<br>perinatal<br>outcomes. | Training on the<br>use of MgSO <sub>4</sub> for<br>severe pre-<br>eclampsia and<br>eclampsia in low-<br>resource settings* | Pregnancy<br><br>Pregnant<br>women                                                                         | 1,045 patients with<br>severe preeclampsia<br>and eclampsia were<br>treated. The case<br>fatality rate for severe<br>pre- eclampsia and<br>eclampsia fell from<br>20.9 % (95 % CI<br>18.7–23.2) to 2.3 %<br>(95 % CI 1.5–3.5).<br>The perinatal<br>mortality rate was<br>12.3% compared to<br>35.3 % in a centre<br>using diazepam.            | Yes: Introduction<br>of MgSO <sub>4</sub> in low-<br>resource settings<br>led to improved<br>maternal and<br>foetal outcomes in<br>patients<br>presenting with<br>severe pre-<br>eclampsia and<br>eclampsia. | Barriers: health<br>workers resistance to<br>change.                                       |

|                                                          |                                       |                                                                                                                                                                                                                                                        |                                                                                                                                                  |                                                   |                                                                                                                                                                                                                                                                                                                                                                                                                                                                                                                                             |                                                                                                                                                                              |                                                                                                                                                                                                                                                                                   |
|----------------------------------------------------------|---------------------------------------|--------------------------------------------------------------------------------------------------------------------------------------------------------------------------------------------------------------------------------------------------------|--------------------------------------------------------------------------------------------------------------------------------------------------|---------------------------------------------------|---------------------------------------------------------------------------------------------------------------------------------------------------------------------------------------------------------------------------------------------------------------------------------------------------------------------------------------------------------------------------------------------------------------------------------------------------------------------------------------------------------------------------------------------|------------------------------------------------------------------------------------------------------------------------------------------------------------------------------|-----------------------------------------------------------------------------------------------------------------------------------------------------------------------------------------------------------------------------------------------------------------------------------|
| Prata et al <sup>65</sup><br>(2012)<br><br>International | Kaduna (NW)<br>urban<br>community     | Before -after<br>analysis (quasi-<br>experimental):<br>To demonstrate<br>the role of<br>community<br>mobilization<br>efforts and<br>examine the<br>safety and<br>feasibility of<br>misoprostol<br>distribution for<br>use in home births<br>in Nigeria | Birth<br>preparedness and<br>the prevention of<br>postpartum<br>haemorrhage<br>through<br>prophylactic use<br>of misoprostol in<br>home births*. | Pregnancy/chil<br>dbirth<br><br>Pregnant<br>women | Community<br>mobilization efforts<br>using TBAs, and<br>CORPs reached most<br>women with<br>information about<br>postpartum<br>haemorrhage and<br>misoprostol (88%).<br>Availability of<br>misoprostol at the<br>community level gave<br>over 70% of enrolled<br>women protection<br>against postpartum<br>haemorrhage. Many<br>women demonstrated<br>an understanding of<br>the threshold for<br>postpartum<br>haemorrhage, the risk<br>of death from this<br>disease, and the role<br>of misoprostol in<br>preventing and<br>treating it. | Yes: Community<br>mobilization had<br>a significant<br>impact on the<br>successful<br>distribution and<br>uptake of a<br>potentially life-<br>saving health<br>intervention. | Barriers: poor<br>diffusion/<br>understanding of<br>health messages led<br>to reluctance to<br>participate in<br>intervention.<br><br>Facilitators:<br>community<br>participation, use of<br>culturally appropriate<br>terms to disseminate<br>information about<br>intervention. |
| Hunyinbo et<br>al <sup>66</sup><br>(2008)<br><br>Nigeria | Ogun (SW)<br>urban<br>health facility | Pre/post<br>evaluation of<br>hospital-based<br>intervention:<br>To evaluate the<br>use of criteria-<br>based audits in<br>improving the<br>quality of<br>hospital-based                                                                                | Clinical/practice<br>guidelines for<br>optimal<br>management of<br>obstetric<br>complications*                                                   | Childbirth<br><br>Pregnant<br>women               | Overall, management<br>of complications such<br>obstetric<br>haemorrhage,<br>eclampsia, obstructed<br>labour, and genital<br>sepsis improved<br>significantly. Clinical<br>monitoring, drug use,<br>and urgent attention                                                                                                                                                                                                                                                                                                                    | Yes: Criteria-<br>based clinical<br>audit was feasible<br>and acceptable<br>strategy for<br>improving<br>management of<br>life-threatening<br>obstetric<br>complications.    | Barriers: Insufficient<br>supply of essential<br>commodities, low<br>morale of the staff.                                                                                                                                                                                         |

|                                                |                                                                                               |                                                                                                                                                                                |                                                               |                                 |                                                                                                                                                                                                                                                                                                                                                    |                                                                                                                                                                                                                                      |                                                                                                                                                           |
|------------------------------------------------|-----------------------------------------------------------------------------------------------|--------------------------------------------------------------------------------------------------------------------------------------------------------------------------------|---------------------------------------------------------------|---------------------------------|----------------------------------------------------------------------------------------------------------------------------------------------------------------------------------------------------------------------------------------------------------------------------------------------------------------------------------------------------|--------------------------------------------------------------------------------------------------------------------------------------------------------------------------------------------------------------------------------------|-----------------------------------------------------------------------------------------------------------------------------------------------------------|
|                                                |                                                                                               | obstetric care services at the Federal Medical Centre, Abeokuta, Nigeria.                                                                                                      |                                                               |                                 | by senior medical staff also improved significantly after intervention.                                                                                                                                                                                                                                                                            |                                                                                                                                                                                                                                      |                                                                                                                                                           |
| Okonofua et al <sup>67</sup> (2013)<br>Nigeria | Kano, Lagos, CrossRivers, Plateau, Borno and Enugu (NW, SW, SS, NE, SE) urban health facility | Pre/Post-intervention (multi-centre) study:<br>To investigate the effectiveness of an intervention aimed at improving the case management of eclampsia                         | Health worker training to improve management of pre-eclampsia | Pregnancy<br><br>Pregnant women | The post intervention case fatality rate of 3.2 % was significantly less than the pre-intervention rate of 15.1 % ( $p < 0.001$ ). The overall maternal and perinatal mortality ratios and rates respectively in the hospitals declined from 1199.2 to 954 per 100,000 deliveries and 141.5 to 129.8 per 1000 births, respectively ( $p > 0.05$ ). | Yes: An intervention to build the capacity of care-providers to use an evidence-based protocol for the treatment of eclampsia in Nigeria was successful in reducing associated case fatality rate, maternal and perinatal mortality. | Barriers: Difficulties in supply of commodities.<br><br>Facilitators: training and retraining of health providers, monitoring, advocacy to policy makers. |
| Igwegbe et al <sup>68</sup> (2012)<br>Nigeria  | Anambra (SE) urban health facility                                                            | Impact evaluation:<br>To evaluate the impact of the introduction of the Service Compact with all Nigerians (SERVICOM) contract on maternal health at Nnamdi Azikiwe University | Improve quality of health services through SERVICOM.          | Pregnancy<br><br>Pregnant women | There was a progressive reduction in MMR and relative risk of maternal mortality, with a corresponding increase in live births. The presentation-intervention interval improved significantly from 2006. This measure significantly reduced type 3 delays                                                                                          | Yes: The resolution by the staff and management to change attitudes and service delivery according to the tenets of SERVICOM led to a gradual and consistent improvement in                                                          |                                                                                                                                                           |

|                                                        |                                                                                               |                                                                                                                                                                                                                    |                                                                       |                                                    |                                                                                                                                                                                                                              |                                                                                                                                                                                    |                                                                                                                        |
|--------------------------------------------------------|-----------------------------------------------------------------------------------------------|--------------------------------------------------------------------------------------------------------------------------------------------------------------------------------------------------------------------|-----------------------------------------------------------------------|----------------------------------------------------|------------------------------------------------------------------------------------------------------------------------------------------------------------------------------------------------------------------------------|------------------------------------------------------------------------------------------------------------------------------------------------------------------------------------|------------------------------------------------------------------------------------------------------------------------|
|                                                        |                                                                                               | Teaching Hospital, Nnewi, Nigeria.                                                                                                                                                                                 |                                                                       |                                                    | from 2006, and consequently improved maternal mortality. Overall, MMR of 1098 per 100 000 live births in 2004 declined to 691 per 100,000 in 2010.                                                                           | all service points within the hospital. This measure significantly reduced the delays to treatment and led to reductions in maternal mortality.                                    |                                                                                                                        |
| Singh et al <sup>69</sup> (2017).<br><br>International | All geopolitical zones (NE, NW, NC, SS, SE, SW) urban and rural community and health facility | Observational (Retrospective cohort analysis): To assess the level of practice of SSC in Nigeria and determine whether it is associated with early initiation of breastfeeding i.e., within the first hour of life | skin to skin contact*                                                 | Postnatal (newborn) newborns                       | Only about 10% of mothers reported babies receiving (skin-skin contact) SSC. Newborns who were perceived to be large at birth were significantly more likely to experience SSC than smaller newborns.                        | No: Coverage of SSC remained low despite known benefits for newborns without complications.                                                                                        | Facilitators: availability of skilled workers are health facilities, equitable diffusion of maternal health knowledge. |
| Galadanci et al <sup>70</sup> (2011)<br><br>Nigeria    | Kano and Kaduna (NW) rural health facility                                                    | Program evaluation (process and outcome): To assess the 2-year results of an ongoing total quality assurance project in 10 Nigerian hospitals in a rural setting, and their impact                                 | Quality assurance project to improve maternal and neonatal mortality. | Across the continuum of care<br><br>Pregnant women | The mean maternal mortality ratio (MMR) was reduced from 1790 per 100,000 births in the first half of 2008 to 940 per 100 000 births in the second half of 2009. The average foetal mortality ratio (FMR) decreased slightly | Yes: Continuous monitoring of quality assurance in maternity units raised the awareness of the quality of obstetric performance and improved the quality of care provided, thereby |                                                                                                                        |

|                                                        |                                    |                                                                                                                                                        |                                                                                              |                                                                                                |                                                                                                                                                                                                                                                                                                                                                                                                      |                                                                                                                                                                                                                                  |                                                                                                      |
|--------------------------------------------------------|------------------------------------|--------------------------------------------------------------------------------------------------------------------------------------------------------|----------------------------------------------------------------------------------------------|------------------------------------------------------------------------------------------------|------------------------------------------------------------------------------------------------------------------------------------------------------------------------------------------------------------------------------------------------------------------------------------------------------------------------------------------------------------------------------------------------------|----------------------------------------------------------------------------------------------------------------------------------------------------------------------------------------------------------------------------------|------------------------------------------------------------------------------------------------------|
|                                                        |                                    | on the MMR and foetal mortality ratio (FMR) in these hospitals from 2008 to 2009.                                                                      |                                                                                              |                                                                                                | from 84.9 to 83.5 per 1000 births.                                                                                                                                                                                                                                                                                                                                                                   | improving MMR and FMR.                                                                                                                                                                                                           |                                                                                                      |
| Gummi et al <sup>71</sup> (1997)                       | Kebbi (NW) rural community         | Pre-post intervention assessment: To assess the effect of community education interventions to encourage utilization of emergency obstetric facilities | Community education intervention to increase knowledge and utilisation of health facilities* | Across the continuum of care<br><br>Women of childbearing age<br>husbands<br>community leaders | A post-intervention mini survey showed knowledge gains of over 30% on awareness of the causes of maternal death, nature of obstructed labour, signs of pre-eclampsia, need for prompt treatment, and importance of delaying marriage. The increase was greatest on the need for prompt care for women with obstetric complications. The case fatality rate declined from 38 % in 1991 to 5% in 1995. | No: Increased awareness of the signs of obstetric complications and the need for prompt treatment among community women and men did not result in greater utilization of emergency obstetric services at the facilities studied. | Barriers: Needing husband's permission to participate, higher costs of emergency obstetric services. |
| Miller et al <sup>72</sup> (2009)<br><br>International | Katsina (NW) urban health facility | Intervention assessment (quasi-experimental): To determine whether the non-pneumatic anti-shock garment (NASG) can                                     | Non-pneumatic anti-shock garment (NASG) for obstetric haemorrhage*                           | Childbirth<br><br>Pregnant women                                                               | Mean measured blood loss in the intervention phase was 73.5±93.9mL, compared with 340.4±248.2 mL pre-intervention (P<0.001). Maternal mortality was lower in the intervention phase                                                                                                                                                                                                                  | Yes: The NASG showed potential for reducing blood loss and maternal mortality caused by obstetric haemorrhage-related shock.                                                                                                     | Barriers: Limited access to services.                                                                |



|                                                |                           |                                                                                                                                                                                                                |                                                                                                           |                                                            |                                                                                                                                                                                                                                                                                                            |                                                                                                                                                            |  |
|------------------------------------------------|---------------------------|----------------------------------------------------------------------------------------------------------------------------------------------------------------------------------------------------------------|-----------------------------------------------------------------------------------------------------------|------------------------------------------------------------|------------------------------------------------------------------------------------------------------------------------------------------------------------------------------------------------------------------------------------------------------------------------------------------------------------|------------------------------------------------------------------------------------------------------------------------------------------------------------|--|
|                                                |                           | improve maternal outcomes.                                                                                                                                                                                     |                                                                                                           |                                                            | than in the pre-intervention phase (7 [8.1%]) vs 21 [25.3%]) (RR 0.32; 95% CI, 0.14 –0.72).                                                                                                                                                                                                                |                                                                                                                                                            |  |
| Odusanya et al <sup>73</sup> (2003)<br>Nigeria | Edo (SS) rural community  | Pre-post program evaluation:<br>To compare vaccination coverage obtained at the baseline and post-intervention.                                                                                                | Privately financed immunization program to increase immunization coverage in a rural community*           | Postnatal (newborn) newborns children up to 2 years of age | Two years after the program was started, immunization coverage rates were 94% for BCG, 88% for DTP (third dose), and 82% for measles. 84% percent of children were fully immunized against all six diseases, compared with 43% at the commencement (p<0.0001). Hepatitis-B coverage (three doses) was 58%. | Yes: The vaccination program has significantly improved vaccination coverage.                                                                              |  |
| Amoran et al <sup>74</sup> (2013)<br>Nigeria   | Ogun (SW) rural community | Intervention evaluation (quasi-experimental):<br>To determine the effect of malaria education programme on the uptake of insecticide-treated nets (ITN) among nursing mothers in rural communities in Nigeria. | Health education intervention on malaria prevention practices among nursing mothers in rural communities* | Pregnancy<br>Nursing mothers                               | Knowledge of indoor spraying increased from 14.7% to 58.2% (P < 0.001) and use of window and door nets increased from 48.3% to 74.8% (P < 0.001). The proportion of those with ITN use increased from 50.8% to 87.4% (P < 0.001) while those with practice of maintaining clean                            | Yes: Malaria control significantly improved in rural areas, as the caregivers were adequately empowered through appropriate health education intervention. |  |

|                                                    |                                                                    |                                                                                                                                                                                              |                                                          |                                                   |                                                                                                                                                                                                                                                                                                                                                                                                                                                |                                                                                                                                                     |                                                                                                                                                                                                                                                   |
|----------------------------------------------------|--------------------------------------------------------------------|----------------------------------------------------------------------------------------------------------------------------------------------------------------------------------------------|----------------------------------------------------------|---------------------------------------------------|------------------------------------------------------------------------------------------------------------------------------------------------------------------------------------------------------------------------------------------------------------------------------------------------------------------------------------------------------------------------------------------------------------------------------------------------|-----------------------------------------------------------------------------------------------------------------------------------------------------|---------------------------------------------------------------------------------------------------------------------------------------------------------------------------------------------------------------------------------------------------|
|                                                    |                                                                    |                                                                                                                                                                                              |                                                          |                                                   | environment also increased from 40.4% to 54.5% (P < 0.001). There were no significant changes in all the practice of malaria prevention methods in the control group.                                                                                                                                                                                                                                                                          |                                                                                                                                                     |                                                                                                                                                                                                                                                   |
| Okonofua et al <sup>75</sup> (2011)<br><br>Nigeria | Whole country: 36 states plus FCT<br><br>rural and urban community | Intervention evaluation (quasi-experimental):<br>To determine the outcome of an advocacy program aimed at implementing a policy of free maternal and child health (MCH) services in Nigeria. | Free maternal and child health (MCH) services in Nigeria | Across the continuum of care<br><br>Policy makers | By December 2009, nine States (and FCT) (24.4%) were practicing comprehensive free maternal and child health policy in Nigeria, while 14 states (37.8%) offered partially free services. This represents an increase of eight states (53.3%) over the 15 states that offered free services before the advocacy activities began. Data from one state indicated an increase in ANC utilisation and attendance for delivery and post-natal care. | Yes: Advocacy has been successful in building the commitment of high-level government officials in addressing maternal and child health in Nigeria. | Barriers: Challenges implementing free services, insufficient data to monitor and evaluate program.<br><br>Facilitators: commitment of policy makers to the issue, stakeholder engagement, demand creation activities, culture of accountability. |

|                                                                       |                                                                 |                                                                                                                                                                     |                                                                                                   |                                                                                        |                                                                                                                                                                                                                                                                                                                                                                                                                                                                 |                                                                                                                                                                           |                                                                                                                                                   |
|-----------------------------------------------------------------------|-----------------------------------------------------------------|---------------------------------------------------------------------------------------------------------------------------------------------------------------------|---------------------------------------------------------------------------------------------------|----------------------------------------------------------------------------------------|-----------------------------------------------------------------------------------------------------------------------------------------------------------------------------------------------------------------------------------------------------------------------------------------------------------------------------------------------------------------------------------------------------------------------------------------------------------------|---------------------------------------------------------------------------------------------------------------------------------------------------------------------------|---------------------------------------------------------------------------------------------------------------------------------------------------|
| Findley et al <sup>76</sup><br>(2013)<br><br>International            | Katsina, Zamfara and Yobe (NE, NW) rural community              | Intervention evaluation quasi-experimental                                                                                                                          | Community Based Maternal, Newborn and Child Health Service Delivery*.                             | Across the continuum of care<br><br>Women of childbearing age (15-49yrs)               | Anti-tetanus vaccination rates and early breast-feeding rates increased. Compared to the control communities, more than twice as many women in intervention communities knew to watch for specific newborn danger signs and significantly fewer mothers did nothing when their child was sick. The largest changes in care for sick children were seen in the use of medications across intervention areas, leading to improved home care for fever and coughs. | Yes: The community-based approach to promoting improved newborn and sick childcare through community volunteers and CHWs resulted in improved newborn and sick childcare. | Facilitators: Group learning and communication model used as part of program strategy.                                                            |
| Pathfinder International <sup>77</sup><br>(2011)<br><br>International | Kano, Lagos, Borno (NW, SW) rural community and health facility | Intervention evaluation (process and outcome):<br>To improve health system and community structures to enable sustainable change in the quality and coordination of | Maternal Health Care Improvement Initiative:<br>Capacity building and Health system strengthening | Across the continuum of care<br><br>Health workers<br>Community and political leaders. | MCHIC members, facility health workers, male motivators, young mother peer educators, CHWs and TBAs were trained in various maternal health care concepts and advocacy. There was an observed increase in community                                                                                                                                                                                                                                             | Yes                                                                                                                                                                       | Barriers:<br>Political constraints, inadequate infrastructure, cultural and religious perceptions and practices, poor monitoring, and evaluation. |

|                                                      |                                                          |                                                                                                                                                                                                                   |                                                              |                                                                          |                                                                                                                                                                                                                                                                                                                                                                                          |                                                                                                                                                                                   |                                                                                                                                |
|------------------------------------------------------|----------------------------------------------------------|-------------------------------------------------------------------------------------------------------------------------------------------------------------------------------------------------------------------|--------------------------------------------------------------|--------------------------------------------------------------------------|------------------------------------------------------------------------------------------------------------------------------------------------------------------------------------------------------------------------------------------------------------------------------------------------------------------------------------------------------------------------------------------|-----------------------------------------------------------------------------------------------------------------------------------------------------------------------------------|--------------------------------------------------------------------------------------------------------------------------------|
|                                                      |                                                          | maternal health (MH) service delivery, and to shape MH care-seeking behaviour among key populations.                                                                                                              |                                                              |                                                                          | service uptake for skilled birth attendants.                                                                                                                                                                                                                                                                                                                                             |                                                                                                                                                                                   | Facilitators: community involvement.                                                                                           |
| Galadanci et al <sup>78</sup> (2010)<br>Nigeria      | Kano (NW) rural and urban health facility                | Impact evaluation:<br>To demonstrate the impact of introduction of free maternity services in Kano state                                                                                                          | Free Maternity Health Service Policy at Secondary Facilities | Across the continuum of care<br><br>Women of childbearing age (15-49yrs) | Since the introduction of free maternity services in 2001, ANC attendance and facility deliveries. Only 50% of women in the State utilize antenatal clinic.                                                                                                                                                                                                                              | No: Despite eight years of free maternity services in Kano State, there is still low utilization of maternity services.                                                           | Barriers: Inadequate funding, poor stock of commodities, inadequate infrastructure, and staff retention.                       |
| Charurat et al <sup>79</sup> (2010)<br>International | Kano, Zamfara and Katsina (NW, NE) urban health facility | Pre/Post intervention evaluation (mixed methodology):<br>To determine the effectiveness of systematic screening to increase the use of FP and PPF services in selected MCHIP-supported sites in Northern Nigeria. | Postpartum Systematic Screening*                             | Postnatal (mothers and newborn)<br><br>Post-partum women                 | With this postpartum systematic screening checklist, clients attending immunization, newborn care and paediatric/sick baby services were more likely to be screened for FP, postnatal care and immunisation services. In response to high unmet need for FP, the majority (73%) of trained providers knew at least three family planning methods that are suitable for postpartum women, | No: The initiative increased screening for postpartum services and overall quality of counselling/ knowledge of providers. It however did not result in an increase in FP uptake. | Barriers: stock outs of commodities, needing husband's permission, long distances, women's lack of information about services. |

|                                                          |                                                                                                                     |                                                                                                                                                                                                          |                                                               |                                                                          |                                                                                                                                                                                                                                                                                                      |                                                                                                                                          |                                                                                                                                                                                                                                                                    |
|----------------------------------------------------------|---------------------------------------------------------------------------------------------------------------------|----------------------------------------------------------------------------------------------------------------------------------------------------------------------------------------------------------|---------------------------------------------------------------|--------------------------------------------------------------------------|------------------------------------------------------------------------------------------------------------------------------------------------------------------------------------------------------------------------------------------------------------------------------------------------------|------------------------------------------------------------------------------------------------------------------------------------------|--------------------------------------------------------------------------------------------------------------------------------------------------------------------------------------------------------------------------------------------------------------------|
|                                                          |                                                                                                                     |                                                                                                                                                                                                          |                                                               |                                                                          | and all of them were providing family planning counselling to pregnant or postpartum women. While family planning referral increase dramatically, only few women (15%) said they would go for referrals same day.                                                                                    |                                                                                                                                          |                                                                                                                                                                                                                                                                    |
| Omole et al <sup>80</sup><br>(2018)<br><br>International | Osun (SW)<br>urban<br>health facility                                                                               | RCT:<br>To determine the impact of an SMS based intervention on maternal health seeking behaviour.                                                                                                       | mhealth/SMS based health promotion intervention*              | Pregnancy<br><br>Pregnant women                                          | An increase in facility-based delivery seen in the intervention group. Most participants in the intervention group expressed support for the use of text message for maternal health promotion                                                                                                       | Yes: Positive impact of SMS intervention on facility-based delivery.                                                                     | Barriers: financial constraints, low level of literacy among recipients.                                                                                                                                                                                           |
| Okoli et al <sup>81</sup><br>(2014)<br><br>Nigeria       | FCT, Nassarawa, Ogun, Kaduna, Zamfara, Bauchi, Anambra, Ebonyi, Bayelsa (NC, SW, NW, NE, SE, SS)<br>rural community | Program evaluation (quasi-experimental design):<br>To describe the use and effect of a Conditional Cash Transfer (CCT) programme to encourage use of critical MNCH services among rural women in Nigeria | Conditional Cash Transfer (CCT) for maternal and child health | Across the continuum of care<br><br>Women of childbearing age (15-49yrs) | The CCT intervention is associated with a statistically significant increase in the monthly number of women attending four or more ANC visits (p < 0.01; 95% confidence interval 7.38 to 22.85). A statistically significant increase was also observed in the monthly number of women receiving two | Yes: CCT intervention showed significant effects on service uptake, although results for several outcomes of interest were inconclusive. | Barriers: loss of CCT beneficiaries to follow up, limited capacity of facilities to meet additional work required.<br><br>Facilitators: Collaborations with other organisations, building trust and promoting utilisation through prompt delivery of intervention. |

|                                                 |                                      |                                                                                                                                                                                      |                                                                                     |                                                                    |                                                                                                                                                                                                                                                                                                                                                                                        |                                                                                                                                                                                             |                                                                                                                                                                                                                                                                                                                |
|-------------------------------------------------|--------------------------------------|--------------------------------------------------------------------------------------------------------------------------------------------------------------------------------------|-------------------------------------------------------------------------------------|--------------------------------------------------------------------|----------------------------------------------------------------------------------------------------------------------------------------------------------------------------------------------------------------------------------------------------------------------------------------------------------------------------------------------------------------------------------------|---------------------------------------------------------------------------------------------------------------------------------------------------------------------------------------------|----------------------------------------------------------------------------------------------------------------------------------------------------------------------------------------------------------------------------------------------------------------------------------------------------------------|
|                                                 |                                      |                                                                                                                                                                                      |                                                                                     |                                                                    | or more Tetanus toxoid doses during pregnancy ( $p < 0.01$ ; 95% CI 9.23 to 34.08). Changes for other outcomes (number of women attending first ANC visit; number of deliveries with skilled attendance; number of neonates receiving OPV at birth) were not found to be statistically significant.                                                                                    |                                                                                                                                                                                             |                                                                                                                                                                                                                                                                                                                |
| Liu et al <sup>82</sup> (2019)<br>International | Akwa Ibom (SS) urban health facility | Pragmatic randomised control trial: To implement and evaluate a conditional cash transfer (CCT) programme for preventing mother-to-child transmission (PMTCT) in Akwa Ibom, Nigeria. | Conditional Cash Transfer (CCT) to improve utilisation of health services for PMTCT | Pregnancy and postnatal (mother and newborn)<br><br>Pregnant women | Women offered the CCT programme were more likely to give birth at the facility compared to women in standard care. For EID testing there was an absolute difference of 12.8% between those offered the CCT intervention and those in standard care. Over 86% of the facility-delivered newborns received nevirapine, and ITT and PP estimates were like those for facility deliveries. | Yes: CCTs improved the likelihood of HIV-positive women giving birth at a facility, of nevirapine being administered to their newborn, and of undergoing EID testing in Akwa Ibom, Nigeria. | Barriers: Challenges with accessing funds/cash, needing to obtaining partner permission, lack of integrated information systems across facilities, requirements to participate and dealing with a new HIV diagnosis. Facilitators: Positive encouragement, regular reminders, and counselling of participants. |

|                                                            |                                                   |                                                                                                                                                                                                         |                                                                              |                                                                      |                                                                                                                                                                                                                                                                                                                                                                    |                                                                                                              |  |
|------------------------------------------------------------|---------------------------------------------------|---------------------------------------------------------------------------------------------------------------------------------------------------------------------------------------------------------|------------------------------------------------------------------------------|----------------------------------------------------------------------|--------------------------------------------------------------------------------------------------------------------------------------------------------------------------------------------------------------------------------------------------------------------------------------------------------------------------------------------------------------------|--------------------------------------------------------------------------------------------------------------|--|
| Edu et al <sup>83</sup><br>(2017)<br><br>Nigeria           | Cross Rivers (SS) rural and urban health facility | Program evaluation using a mixed method design:<br>To evaluate the effect of a free maternal health care program on the health care-seeking behaviours of pregnant women in Cross River State, Nigeria. | Free Maternal Health Care Program at primary and secondary health facilities | Across the continuum of care<br>Women of childbearing age (15-49yrs) | Results of quantitative data show increase in the percentage of women accessing maternal health services. Qualitative results showed that women perceived that there have been increases in the number of women who utilize Antenatal care, delivery, and Post-Partum Care at health facilities, following the removal of direct cost of maternal health services. | Yes: Intervention led to an increase in the number of women who utilise health facilities for their care.    |  |
| Noguchi et al <sup>84</sup><br>(2020)<br><br>International | Nassarawa State (NC) urban health facility        | Pragmatic, cluster randomized, controlled trial:<br>To investigate the impact of G-ANC on various maternal newborn health-related outcomes- IPTp uptake and insecticide-treated nets (ITN) use.         | Grouped Antenatal Care for MIP interventions*                                | Pregnancy<br><br>Pregnant women                                      | Mean number of IPTp doses received was higher for intervention versus control arm. Reported use of ITN the previous night was similarly high in both arms for mothers in Nigeria (over 92%). Reported ITN use for infants (but not mothers) was higher in the intervention versus control arm in Nigeria.                                                          | Yes: G-ANC may support uptake of important MIP interventions, particularly IPTp coverage and IPTp-SP uptake. |  |

|                                                              |                                                             |                                                                                                                                                                                                                                       |                                                                                                       |                                                                                                                                      |                                                                                                                                                                                                                                                                                                                                                                 |                                                                                                                                                                                           |                                                                                                                                                                                                                                                      |
|--------------------------------------------------------------|-------------------------------------------------------------|---------------------------------------------------------------------------------------------------------------------------------------------------------------------------------------------------------------------------------------|-------------------------------------------------------------------------------------------------------|--------------------------------------------------------------------------------------------------------------------------------------|-----------------------------------------------------------------------------------------------------------------------------------------------------------------------------------------------------------------------------------------------------------------------------------------------------------------------------------------------------------------|-------------------------------------------------------------------------------------------------------------------------------------------------------------------------------------------|------------------------------------------------------------------------------------------------------------------------------------------------------------------------------------------------------------------------------------------------------|
| Oguntunde et al <sup>85</sup> (2018)<br><br>Nigeria          | Kaduna and Jigawa (NW) rural community                      | Program outcome evaluation:<br>To assess the perceptions of stakeholders and beneficiaries of ETS in two states in northern Nigeria, comparing two models of ETS [stand alone or part of an integrated package of MNH interventions]. | Emergency Transport Schemes (ETS)*                                                                    | Pregnancy and childbirth.<br>Pregnant women<br>husbands<br>community members<br>community health workers<br>health service providers | Demand creation activities – especially working with traditional birth attendants and religious leaders – provided a strong linkage between the ETS and families of women in need of emergency transport services. Community members perceived the ETS model that included demand-generating activities as being more reliable and responsive to women's needs. | Yes: ETS remained a key solution to lack of transport as a barrier to utilizing maternal and newborn health services in emergency situations in many rural and hard-to-reach communities. | Barriers: Security challenges, need for husband's permission, poor road conditions, driver's reluctance to attend to non-emergencies.<br><br>Facilitators: Dedication of drivers in the scheme, integrated approach of program, community awareness. |
| Lalonde & Grellier <sup>86</sup> (2012)<br><br>International | Edo, Anambra, and Kaduna (SE, SS, NW) urban health facility | Program impact evaluation:<br>An assessment of FIGO Saving Mothers and Newborns Initiative 2006–2011                                                                                                                                  | FIGO Saving Mothers and Newborns Initiative: training in emergency obstetric and newborn care (EmONC) | Across the continuum of care<br><br>Mothers and newborns                                                                             | Magnesium sulfate supplied to all State hospitals by Kaduna State Government. Efforts led to the cost of magnesium sulfate reduced by manufacturers. And at least 4 obstetric protocols introduced. Significant reduction (approx. 28%) in maternal mortality due to eclampsia at the project site.                                                             | Yes.                                                                                                                                                                                      | Barriers: Limited financial resources, civil unrest.<br><br>Facilitators: community participation and ownership.                                                                                                                                     |



|                                                          |                                                             |                                                                                                                                             |                                     |                                                             |                                                                                                                                                                                                                                                                                                 |                                                                                                                                                             |                                                                                                                                            |
|----------------------------------------------------------|-------------------------------------------------------------|---------------------------------------------------------------------------------------------------------------------------------------------|-------------------------------------|-------------------------------------------------------------|-------------------------------------------------------------------------------------------------------------------------------------------------------------------------------------------------------------------------------------------------------------------------------------------------|-------------------------------------------------------------------------------------------------------------------------------------------------------------|--------------------------------------------------------------------------------------------------------------------------------------------|
| Okeke et al <sup>87</sup><br>(2017)<br><br>International | Enugu, Kwara and Kano (SE, NC, NE)<br>rural<br>community    | Program evaluation-outcome:<br>To assess the outcomes of the implementation of the Nigeria Midwives Service Scheme                          | Midwives Service Scheme (MSS)*      | Pregnancy and childbirth.<br><br>Pregnant women<br>Midwives | A slight increase of the use of antenatal care was observed, with no measurable impact on skilled birth attendance. Findings report important design, implementation and operational challenges that likely contributed to the program's lack of impact.                                        | No: Program achieved only a modest impact on the use of antenatal care and no measurable impact on skilled birth attendance.                                | Barriers: Problems with the design of program, geographical challenges, limited awareness of clinic services and poor quality of services. |
| Ameh et al <sup>88</sup><br>(2016)<br><br>International  | Multi-country: Nigeria included<br>urban<br>health facility | Post program evaluation:<br>To evaluate the effectiveness of healthcare provider training in Emergency Obstetric and Newborn Care (EmOC&NC) | standardised EmONC training package | Across the continuum of care<br><br>Healthcare providers    | 99.7% of healthcare providers improved their overall score for knowledge and for skill. There were significant improvements in knowledge and skills for each cadre of healthcare provider ( $p < 0.05$ ), with the largest change seen for recognition and management of obstetric haemorrhage. | Yes: Short in-service EmOC&NC training was associated with improved knowledge and skills for all cadres of healthcare providers working in maternity wards. | Barriers: Problems with intervention design.                                                                                               |

|                                                          |                                                         |                                                                                                                                                                                                                                                                            |                                                                                                |                                                                    |                                                                                                                                                                                                                                                                                                                                                                                                                                             |                                                                                                                                                                                                                                                                                        |                                                                                                                                                                                  |
|----------------------------------------------------------|---------------------------------------------------------|----------------------------------------------------------------------------------------------------------------------------------------------------------------------------------------------------------------------------------------------------------------------------|------------------------------------------------------------------------------------------------|--------------------------------------------------------------------|---------------------------------------------------------------------------------------------------------------------------------------------------------------------------------------------------------------------------------------------------------------------------------------------------------------------------------------------------------------------------------------------------------------------------------------------|----------------------------------------------------------------------------------------------------------------------------------------------------------------------------------------------------------------------------------------------------------------------------------------|----------------------------------------------------------------------------------------------------------------------------------------------------------------------------------|
| Brals et al <sup>89</sup><br>(2017)<br><br>International | Kwara (NC)<br>rural<br>community and<br>health facility | Interrupted time<br>series- (quasi-<br>experimental<br>design):<br>To evaluate the<br>effect of the<br>introduction of a<br>multifaceted<br>voluntary health<br>insurance<br>programme on<br>hospital deliveries<br>in rural Nigeria                                       | Kwara State<br>Health Insurance<br>program- a<br>community-based<br>health insurance<br>scheme | Across the<br>continuum of<br>care<br><br>Households               | Insurance coverage<br>reached up to 70.2%<br>in four years in the<br>program area. An<br>increase in hospital<br>deliveries was<br>observed in the<br>program area during<br>the 4-year follow-up<br>period. Even women<br>who did not enrol in<br>health insurance but<br>who could make use<br>of the upgraded care,<br>delivered more often<br>in a hospital during<br>the follow-up period<br>than women living in<br>the control area. | Yes: Voluntary<br>health insurance<br>combined with<br>quality healthcare<br>services was<br>highly effective<br>in increasing<br>hospital deliveries<br>in rural Nigeria,<br>by improving<br>access to<br>healthcare for<br>insured and<br>uninsured women<br>in the program<br>area. | Barriers: Long<br>distance from<br>facilities.<br><br>Facilitators:<br>Integrated approach,<br>improvement in<br>quality of services.                                            |
| Okeke et al <sup>90</sup><br>(2016)<br><br>International | Whole country-<br>Nigeria<br>rural<br>community         | Pre/post program<br>evaluation:<br>To examine the<br>effects of the<br>Midwives Service<br>Scheme (MSS), a<br>public sector<br>program in<br>Nigeria that<br>increased the<br>supply of skilled<br>midwives in rural<br>communities on<br>pregnancy and<br>birth outcomes. | Midwives Service<br>Scheme (MSS)*                                                              | Pregnancy and<br>childbirth<br><br>Women of<br>childbearing<br>age | The main measured<br>effect of the scheme<br>was a 7.3 percentage<br>point increase in<br>antenatal care use in<br>program clinics and a<br>5-percentage point<br>increase in overall use<br>of antenatal care, both<br>within the first year of<br>the program. We<br>found no statistically<br>significant effect of<br>the scheme on skilled<br>birth attendance or on<br>maternal delivery<br>complications.                            | No: Minimal<br>improvements<br>seen following the<br>program,<br>highlighting that<br>scaling up supply<br>of midwives may<br>not be sufficient<br>on its own to<br>improve maternal<br>and newborn<br>health.                                                                         | Barriers: Challenges<br>with retention of<br>midwives in scheme,<br>poor quality of<br>services, low<br>perceived need for<br>services, lack of<br>transportation<br>facilities. |

|                                                        |                                                          |                                                                                                                                                                                                                                                                                |                                                                                                 |                                                                                         |                                                                                                                                                                                                                                                                                                                                                                                                                                                 |                                                                                                                                                                                                                                                                                                   |                                                                                                                                                                                           |
|--------------------------------------------------------|----------------------------------------------------------|--------------------------------------------------------------------------------------------------------------------------------------------------------------------------------------------------------------------------------------------------------------------------------|-------------------------------------------------------------------------------------------------|-----------------------------------------------------------------------------------------|-------------------------------------------------------------------------------------------------------------------------------------------------------------------------------------------------------------------------------------------------------------------------------------------------------------------------------------------------------------------------------------------------------------------------------------------------|---------------------------------------------------------------------------------------------------------------------------------------------------------------------------------------------------------------------------------------------------------------------------------------------------|-------------------------------------------------------------------------------------------------------------------------------------------------------------------------------------------|
| Okereke et al <sup>91</sup><br>(2015)<br><br>Nigeria   | Jigawa (NW)<br>urban<br>community and<br>health facility | Post intervention<br>assessment<br>(qualitative):<br>To assess the<br>potential of<br>clinical mentoring<br>to improve<br>maternal,<br>newborn and<br>child health<br>service delivery,<br>as well as the<br>successes/challen<br>ges associated<br>with the<br>implementation | Clinical<br>mentoring for<br>health workers                                                     | Across the<br>continuum of<br>care<br><br>health workers<br>health service<br>providers | Clinical mentoring<br>improved service<br>delivery within the<br>health facilities.<br>Significant<br>improvements in the<br>professional capacity<br>of mentored health<br>workers were<br>observed. Best<br>practices were<br>introduced with the<br>support of the clinical<br>mentors such as the<br>use of magnesium<br>sulphate and<br>misoprostol for the<br>management of<br>eclampsia and post-<br>partum haemorrhage<br>respectively. | Yes: Stakeholders<br>report that the<br>introduction of<br>clinical mentoring<br>into the Jigawa<br>State health<br>system gave rise<br>to an improved<br>capacity of the<br>mentored health<br>care workers to<br>deliver better<br>quality maternal,<br>newborn and<br>child health<br>services | Barriers: Financial<br>costs of recruiting<br>clinical mentors,<br>insufficient time for<br>health providers.<br><br>Facilitators:<br>promoting local<br>ownership and<br>sustainability. |
| Oguntunde et<br>al <sup>92</sup> (2019)<br><br>Nigeria | Kaduna and<br>Katsina (NW)<br>rural<br>community         | Pre/post<br>intervention<br>evaluation<br>(qualitative):<br>To examine an<br>intervention that<br>educated married<br>men in northern<br>Nigeria about<br>health issues<br>related to<br>pregnancy,<br>labour, delivery,<br>and the<br>postpartum                              | Men's support<br>group<br>intervention to<br>increase male<br>involvement in<br>women's health* | Across the<br>continuum of<br>care<br><br>Married men.                                  | Perceptions of the<br>male support groups<br>were overwhelmingly<br>positive. Participants<br>internalized important<br>messages they<br>learned, which<br>influenced their<br>decisions related to<br>the health of their<br>wives and children.<br>Some take it upon<br>themselves to educate<br>others in their<br>communities about                                                                                                         | Yes: In the<br>northern Nigeria<br>context, educating<br>men about danger<br>signs of<br>pregnancy,<br>labour, delivery,<br>newborn, and<br>child health was<br>crucial to<br>improving<br>maternal and<br>newborn health<br>outcomes. The<br>intervention was                                    | Barriers: Financial<br>cost of associated<br>services.<br>Facilitators:<br>Inclusion of the<br>community, positive<br>perceived benefits of<br>participation.                             |

|                                             |                                                 |                                                                                                                                                                                  |                                                         |                                                |                                                                                                                                                                                                                                                                                        |                                                                                                                                                       |                                                                                                                                                                                                                                            |
|---------------------------------------------|-------------------------------------------------|----------------------------------------------------------------------------------------------------------------------------------------------------------------------------------|---------------------------------------------------------|------------------------------------------------|----------------------------------------------------------------------------------------------------------------------------------------------------------------------------------------------------------------------------------------------------------------------------------------|-------------------------------------------------------------------------------------------------------------------------------------------------------|--------------------------------------------------------------------------------------------------------------------------------------------------------------------------------------------------------------------------------------------|
|                                             |                                                 | period, as well as newborn and child health, through participation in male support groups.                                                                                       |                                                         |                                                | what they learned, and many say they see changes at the community level, with more utilization of maternal, newborn, and child health services.                                                                                                                                        | successful such that the effect of the intervention went beyond participants to the community.                                                        |                                                                                                                                                                                                                                            |
| Adaji et al <sup>93</sup> (2019)<br>Nigeria | Kaduna (NW) rural community and health facility | Pre/post intervention assessment: To assess women's experience of group prenatal care in a rural Nigerian community.                                                             | Centering Pregnancy Model- group prenatal care program* | Pregnancy<br>Pregnant women                    | Mothers who could mention at least five out of eight danger signs of pregnancy increased significantly. Commitment to birth preparedness plans was high. The mothers enjoyed the group sessions and shared the lessons they learned with others.                                       | Yes: Group prenatal care was acceptable to women and utilised.                                                                                        | Barriers: Limited health service providers for implementation.<br><br>Facilitators: positive peer group dynamics and social networks.                                                                                                      |
| Onwujekwe et al <sup>94</sup> (2019)        | FCT (NC) urban health facility                  | Post program assessment (Qualitative): To examine the implementation of the NHIS-MCH project and identify barriers and facilitators for implementation, adaptation and scale up. | Free maternal and child health program                  | Across the continuum of care<br>Pregnant women | The program enrolled about 1.5 million pregnant women and children during the period of implementation in the country. The respondents perceived the program as pro-poor, efficient, and effective, and led to marked improvement in the functionality of the facilities, availability | Yes: The NHIS-MDG FMCHP had positive impact on the target population though it was not sustained following the conclusion of the MDG program in 2015. | Barriers: Inadequate stakeholder consultation, alleged corrupt practices, human resources challenges, infrastructural challenges, issues with counterpart funding and public financing.<br><br>Facilitators: Problems with project design. |

|                                                    |                                       |                                                                                                                                                                                                                        |                                                                                                                                     |                                                |                                                                                                                                                                                                                                       |                                                                                                                                                          |                                                                          |
|----------------------------------------------------|---------------------------------------|------------------------------------------------------------------------------------------------------------------------------------------------------------------------------------------------------------------------|-------------------------------------------------------------------------------------------------------------------------------------|------------------------------------------------|---------------------------------------------------------------------------------------------------------------------------------------------------------------------------------------------------------------------------------------|----------------------------------------------------------------------------------------------------------------------------------------------------------|--------------------------------------------------------------------------|
|                                                    |                                       |                                                                                                                                                                                                                        |                                                                                                                                     |                                                | of services and reduced out-of-pocket expenditure, which led to increased demand and utilization of MCH services.                                                                                                                     |                                                                                                                                                          |                                                                          |
| Brown et al <sup>95</sup><br>(2016)<br><br>Nigeria | Oyo (SW)<br>urban<br>community        | Cluster randomized control trial:<br>To evaluate the effect of reminder/recall system and Primary Health Care Immunization Providers' Training (PHCIPT) intervention on routine immunization completion among infants. | Community Nurse led Reminder/Recall (R/R) system Alone and in combination with Primary Health care immunization providers' training | Postnatal (infant)<br><br>Mothers and infants. | Cell phone reminder/recall was associated with the highest immunization completion rates among the children in the study.                                                                                                             | Yes: cell phone reminder/recall was effective in improving immunization completion rates.                                                                |                                                                          |
| Asa et al <sup>96</sup><br>(2008)<br><br>Nigeria   | Osun (SW)<br>rural<br>health facility | Open randomised control trial:<br>To evaluate the efficacy of intermittent preventive treatment of malaria using sulphadoxine-pyrimethamine (SP) in the                                                                | Intermittent Preventive Therapy in Pregnancy IPT-p for malaria using sulphadoxine-pyrimethamine (SP)                                | Pregnancy<br><br>Pregnant women                | 33 (22.6%) and 52 (37.1%) women in the study and control groups, respectively, had anaemia. With multivariate analysis, the difference in the incidence of anaemia in the two groups remained significant ( $p = 0.01$ ; odds ratio = | Yes: The IPT regime with sulphadoxine-pyrimethamine is an effective, practicable strategy to decrease risk of anaemia in women of low parity residing in | Facilitators:<br>acceptability of intervention among target populations. |

|                                              |                                                  |                                                                                                                                                                                                  |                                                        |                                                          |                                                                                                                                                                                                                                                                                                                                                                                                                                                                                                        |                                                                                                                                                                                                                             |  |
|----------------------------------------------|--------------------------------------------------|--------------------------------------------------------------------------------------------------------------------------------------------------------------------------------------------------|--------------------------------------------------------|----------------------------------------------------------|--------------------------------------------------------------------------------------------------------------------------------------------------------------------------------------------------------------------------------------------------------------------------------------------------------------------------------------------------------------------------------------------------------------------------------------------------------------------------------------------------------|-----------------------------------------------------------------------------------------------------------------------------------------------------------------------------------------------------------------------------|--|
|                                              |                                                  | prevention of anaemia in women of low parity in a low socio-economic, malaria endemic setting.                                                                                                   |                                                        |                                                          | 0.5; 95% confidence interval = 0.29–0.85).                                                                                                                                                                                                                                                                                                                                                                                                                                                             | areas endemic for malaria.                                                                                                                                                                                                  |  |
| Walker et al <sup>97</sup> (2018)<br>Nigeria | Katsina (NW) rural community and health facility | Post intervention evaluation (quasi-experimental design):<br>To assess the impact of Muslim opinion leaders' training of healthcare providers on the uptake of MNCH services in Northern Nigeria | Muslim Opinion Leaders' led training of health workers | Across the continuum of care<br><br>Healthcare providers | The result indicates a significant difference both in perception and in practices between healthcare providers in intervention and control facilities, with respect to MNCH uptake. Access to services was higher in intervention facilities than in control facilities, with routine immunisation (including polio) recording highest hospital visits followed by other MNCH services related to pregnancy/child development. Family planning and hospital delivery were the least accessed services. | Yes: The healthcare providers who received trainings on Islamic precepts related to MNCH were able to spend greater amount of time with clients, providing counselling on Islam and MNCH. This led to improvements in MNCH. |  |

|                                                           |                                                          |                                                                                                                                                                                                                                                 |                                                                                                                                                         |                                                                                       |                                                                                                                                                                                                                                                      |                                                                                                                                                                                                                                                  |                                                                                                                                                      |
|-----------------------------------------------------------|----------------------------------------------------------|-------------------------------------------------------------------------------------------------------------------------------------------------------------------------------------------------------------------------------------------------|---------------------------------------------------------------------------------------------------------------------------------------------------------|---------------------------------------------------------------------------------------|------------------------------------------------------------------------------------------------------------------------------------------------------------------------------------------------------------------------------------------------------|--------------------------------------------------------------------------------------------------------------------------------------------------------------------------------------------------------------------------------------------------|------------------------------------------------------------------------------------------------------------------------------------------------------|
| Ehigiegba et al <sup>98</sup><br>(2012)<br><br>Nigeria    | Rivers (SS)<br>urban<br>community and<br>health facility | Post program<br>evaluation:<br>To assess the<br>implementation of<br>a PMTCT<br>program in a<br>semi-urban<br>cottage hospital,<br>with a community<br>health insurance<br>scheme.                                                              | Community<br>Health Insurance<br>Scheme to<br>promote the<br>utilisation of<br>MNCH services                                                            | Across the<br>continuum of<br>care<br><br>Pregnant<br>women.                          | Service utilisation<br>increased<br>significantly. Average<br>deliveries increased<br>from about 20 to 120<br>per month. New<br>infections were less<br>than 2% in the period<br>compared to 29%<br>prior to the CHIS.                               | Yes: CHIS<br>encouraged<br>women to book<br>early for ANC,<br>which improved<br>utilisation of VCT<br>and other PMTCT<br>services.                                                                                                               | Facilitators: active<br>community<br>engagement,<br>integration/<br>coordination of<br>activities.                                                   |
| Adeleye et al <sup>99</sup><br>(2011)<br><br>Nigeria      | Edo (SS)<br>rural<br>community                           | Program process<br>and outcome<br>evaluation:<br>To describe the<br>development and<br>implementation<br>process of the<br>Ekiadolor safe<br>motherhood<br>program and to<br>analyze how it<br>improved<br>maternal health in<br>the community. | Ekiadolor safe<br>motherhood<br>program:<br>communication<br>intervention to<br>increase positive<br>male engagement<br>in maternal health              | Across the<br>continuum of<br>care<br><br>Community<br>elders<br>young adult<br>males | A useful<br>communication<br>intervention was<br>developed that<br>increased the<br>possibility of positive<br>male engagement in<br>maternal health.                                                                                                | Yes: Through<br>small-group<br>health talks, the<br>male leaders in<br>Ekiadolor,<br>Southern Nigeria,<br>became motivated<br>to act as change<br>agents and<br>encouraged other<br>men to assist with<br>maternal health in<br>their community. | Facilitators: delivery<br>of intervention in line<br>with local<br>governance and<br>customs                                                         |
| Haver et al <sup>100</sup><br>(2015)<br><br>International | Akwa Ibom (SS)<br>rural<br>community                     | Program<br>evaluation:<br>To describe<br>outcomes,<br>commonalities<br>and lessons<br>learned from<br>country programs<br>in which tasks in<br>health promotion<br>and distribution of                                                          | CHW-led IPTp<br>provision,<br>insecticide-treated<br>net distribution as<br>part of a<br>community-<br>directed<br>intervention for<br>malaria control* | Pregnancy<br><br>Community<br>health workers                                          | The effects of the CDI<br>program were largest<br>for IPTp adherence,<br>increasing the<br>proportion of pregnant<br>women taking at least<br>two sulfadoxine-<br>pyrimethamine doses<br>during pregnancy by<br>five times in the CDI<br>communities | Yes: The health<br>promotion and<br>distribution of<br>commodities<br>afforded by these<br>community based<br>strategies yielded<br>greater uptake of<br>interventions than<br>would have been<br>achieved through                               | Barriers: poor access<br>to underserved areas<br>and absence of<br>political will and<br>commitment.<br><br>Facilitators:<br>community<br>engagement |

|                                                        |                                                                         |                                                                                                                                                                                |                                                                                            |                                                                            |                                                                                                                                                                                                                                                                                       |                                                                                                                                                                                                                |                                                                                                                                      |
|--------------------------------------------------------|-------------------------------------------------------------------------|--------------------------------------------------------------------------------------------------------------------------------------------------------------------------------|--------------------------------------------------------------------------------------------|----------------------------------------------------------------------------|---------------------------------------------------------------------------------------------------------------------------------------------------------------------------------------------------------------------------------------------------------------------------------------|----------------------------------------------------------------------------------------------------------------------------------------------------------------------------------------------------------------|--------------------------------------------------------------------------------------------------------------------------------------|
|                                                        |                                                                         | commodities were intentionally shifted from skilled providers to CHWs to advance MNH strategies                                                                                |                                                                                            |                                                                            | compared with three times in the control group, for whom IPTp was available only at prenatal care (P<0.001)                                                                                                                                                                           | facility-based services alone.                                                                                                                                                                                 |                                                                                                                                      |
| Okeibunor et al <sup>101</sup> (2011)<br>International | Akwa Ibom (SS) rural community                                          | Before and After analysis (quasi-experimental design): To determine the degree to which community-directed interventions can improve access to malaria prevention in pregnancy | A community directed intervention (CDI) to improve effective access to malaria prevention. | Pregnancy<br>Pregnant women                                                | More women slept under an ITN during pregnancy in the treatment areas. The effects of the CDI programme were largest for IPTp adherence, increasing the fraction of pregnant women taking at least two SP doses during pregnancy by 35% relative to the control areas.                | Yes: Inclusion of community-based programmes with supply-side interventions substantially increased effective access to malaria prevention, and increase access to formal health care access-particularly ANC. | Barriers: Limited availability of intervention (ITNs).<br>Facilitators: training and involvement of community members as volunteers. |
| Findley et al <sup>102</sup> (2015)<br>International   | Katsina, Zamfara (NW) and Yobe (NE) rural community and health facility | Quasi-experimental design: To evaluate an integrated maternal, newborn, and child health (MNCH) program to improve maternal health outcomes in Northern Nigeria                | Integrated Maternal, Newborn and Child Health (IMNCH) program*                             | Across the continuum of care<br><br>Women of childbearing age: 15-49 years | There was significant improvement in nearly all maternal health indicators assessed. These include women with standing permission from their husband to go to the health centre; health care utilization; delivery with a skilled birth attendant, knowledge of maternal danger signs | Yes: The improvements between 2009 and 2013 demonstrate the measurable impact on maternal health outcomes of the program through local communities and primary health care services.                           | Facilitators: Integration of interventions, improved quality of services at facilities, community engagement.                        |



|                                                     |                                   |                                                                                                                                                                 |                                                                                         |                                                         |                                                                                                                                                                                                                                                                                                                           |                                                                                                                                                                                                                  |                                                                                                                                                                               |
|-----------------------------------------------------|-----------------------------------|-----------------------------------------------------------------------------------------------------------------------------------------------------------------|-----------------------------------------------------------------------------------------|---------------------------------------------------------|---------------------------------------------------------------------------------------------------------------------------------------------------------------------------------------------------------------------------------------------------------------------------------------------------------------------------|------------------------------------------------------------------------------------------------------------------------------------------------------------------------------------------------------------------|-------------------------------------------------------------------------------------------------------------------------------------------------------------------------------|
|                                                     |                                   |                                                                                                                                                                 |                                                                                         |                                                         | and having at least 1 antenatal care (ANC) visit.                                                                                                                                                                                                                                                                         |                                                                                                                                                                                                                  |                                                                                                                                                                               |
| Leight et al <sup>103</sup> (2018)<br>International | Jigawa (NW) rural health facility | Cluster randomized control trial:<br>To examine the association between birth care receipt and use on maternal and neonatal health outcomes in Jigawa, Nigeria. | Community Resource Person (CoRP) led distribution of safe birth kits to pregnant women* | Pregnancy<br><br>Women of childbearing age: 15-49 years | Only about half of women who received the birth kits, used the kits.<br>There were no significant associations between birth kit use and facility-based delivery, completion of 4 or more ANC visits, skilled birth attendance and post-natal care. Women more likely to report prolonged labour and postpartum bleeding. | No: Introduction and the use of birth kits was not associated with reductions in maternal or neonatal morbidity, which may have been shaped by the mechanisms through which women accessed and utilise the kits. | Barriers: low level of penetration of birth kits, challenges with insecurity, low level of use of birth kits.<br><br>Facilitators: adequate education about the intervention. |

\* Interventions aligned with WHO 2011 and 2017 guidelines used in study.

NC: North-Central region

NW: North-West region

NE: North-East region

SS: South-South region

SE: South-East region

SW: South-West region
